# Supplementary material for: Methods of protein corona isolation for magnetic nanoparticles
Source: Royal Society of Chemistry journal article supplement (doi:10.1039/c7an00646b), 2017-01-01
Supplement: c7an00646b2.xlsx [file c7an00646b2.xlsx]

## Sheet: B1400 Repetition 1
Number	Identified Proteins	Spectrum Count B1400 N°1	Relative abundance (%)	Sum	Accession Number	Molecular Weight	Peptide count
1	Complement C3 OS=Homo sapiens GN=C3 PE=1 SV=2	1657	7.8334		P01024	187 kDa	119
2	Apolipoprotein B-100 OS=Homo sapiens GN=APOB PE=1 SV=2	1523	7.19992	21153	P04114	516 kDa	219
3	Complement C4-A OS=Homo sapiens GN=C4A PE=1 SV=2	1174	5.55004		P0C0L4	193 kDa	93
4	Serum albumin OS=Homo sapiens GN=ALB PE=1 SV=2	935	4.42018		P02768	69 kDa	56
5	Apolipoprotein A-I OS=Homo sapiens GN=APOA1 PE=1 SV=1	834	3.9427		P02647	31 kDa	31
6	Prothrombin OS=Homo sapiens GN=F2 PE=1 SV=2	734	3.46996		P00734	70 kDa	40
7	Apolipoprotein E OS=Homo sapiens GN=APOE PE=1 SV=1	720	3.40377		P02649	36 kDa	35
8	Antithrombin-III OS=Homo sapiens GN=SERPINC1 PE=1 SV=1	705	3.33286		P01008	53 kDa	39
9	Plasminogen OS=Homo sapiens GN=PLG PE=1 SV=2	641	3.0303		P00747	91 kDa	67
10	Plasma protease C1 inhibitor OS=Homo sapiens GN=SERPING1 PE=1 SV=2	562	2.65683		P05155	55 kDa	22
11	Complement factor H OS=Homo sapiens GN=CFH PE=1 SV=4	529	2.50083		P08603	139 kDa	72
12	Vitronectin OS=Homo sapiens GN=VTN PE=1 SV=1	520	2.45828		P04004	54 kDa	30
13	Kininogen-1 OS=Homo sapiens GN=KNG1 PE=1 SV=2	513	2.42519		P01042	72 kDa	37
14	Coagulation factor XII OS=Homo sapiens GN=F12 PE=1 SV=3	417	1.97135		P00748	68 kDa	45
15	Plasma kallikrein OS=Homo sapiens GN=KLKB1 PE=1 SV=1	413	1.95244		P03952	71 kDa	41
16	Ig gamma-3 chain C region OS=Homo sapiens GN=IGHG3 PE=1 SV=1	380	1.79644		A0A087WXL8	57 kDa	26
17	C4b-binding protein alpha chain OS=Homo sapiens GN=C4BPA PE=1 SV=2	352	1.66407		P04003	67 kDa	31
18	Complement C1q subcomponent subunit C OS=Homo sapiens GN=C1QC PE=1 SV=3	327	1.54588		P02747	26 kDa	6
19	Ig gamma-1 chain C region OS=Homo sapiens GN=IGHG1 PE=1 SV=1	323	1.52697		A0A087WV47	51 kDa	3
20	Ig gamma-1 chain C region OS=Homo sapiens GN=IGHG1 PE=1 SV=1	310	1.46551		A0A087WYE1	52 kDa	11
21	Histidine-rich glycoprotein OS=Homo sapiens GN=HRG PE=1 SV=1	305	1.44188		P04196	60 kDa	28
22	Alpha-2-macroglobulin OS=Homo sapiens GN=A2M PE=1 SV=3	299	1.41351		P01023	163 kDa	50
23	Complement C1q subcomponent subunit B OS=Homo sapiens GN=C1QB PE=1 SV=1	280	1.32369		D6R934 (+1)	26 kDa	14
24	Gelsolin OS=Homo sapiens GN=GSN PE=1 SV=1	242	1.14405		P06396	86 kDa	38
25	Ig mu chain C region OS=Homo sapiens GN=IGHM PE=1 SV=1	223	1.05422		A0A087X2C0	64 kDa	20
26	Ig kappa chain C region OS=Homo sapiens GN=IGKC PE=1 SV=1	208	0.983312		A0A087X130	25 kDa	3
27	Protein IGKV3-11 OS=Homo sapiens GN=IGKV3-11 PE=4 SV=1	208	0.983312		A0A087WZW8	26 kDa	17
28	Ig gamma-2 chain C region OS=Homo sapiens GN=IGHG2 PE=1 SV=2	179	0.846216		P01859	36 kDa	4
29	Carboxypeptidase B2 OS=Homo sapiens GN=CPB2 PE=1 SV=2	172	0.813123		Q96IY4	48 kDa	16
30	Serum amyloid A-4 protein OS=Homo sapiens GN=SAA4 PE=1 SV=2	168	0.794214		P35542	15 kDa	7
31	Complement factor H-related protein 1 OS=Homo sapiens GN=CFHR1 PE=1 SV=2	167	0.789486		Q03591	38 kDa	8
32	Coagulation factor V OS=Homo sapiens GN=F5 PE=1 SV=1	158	0.746939		A0A0A0MRJ7 (+1)	252 kDa	45
33	Complement C1s subcomponent OS=Homo sapiens GN=C1S PE=1 SV=1	144	0.680755		P09871	77 kDa	25
34	Complement C1r subcomponent OS=Homo sapiens GN=C1R PE=1 SV=1	143	0.676027		B4DPQ0	82 kDa	27
35	Apolipoprotein C-I (Fragment) OS=Homo sapiens GN=APOC1 PE=1 SV=1	134	0.63348		K7ERI9 (+1)	9 kDa	10
36	Coagulation factor XI OS=Homo sapiens GN=F11 PE=1 SV=1	131	0.619297		P03951	70 kDa	27
37	Isoform 2 of Apolipoprotein L1 OS=Homo sapiens GN=APOL1	124	0.586205		O14791-2	46 kDa	19
38	Uncharacterized protein OS=Homo sapiens PE=1 SV=1	119	0.562568		B4E1Z4	141 kDa	29
39	Protein S100-A8 OS=Homo sapiens GN=S100A8 PE=1 SV=1	106	0.501111		P05109	11 kDa	6
40	Inter-alpha-trypsin inhibitor heavy chain H1 OS=Homo sapiens GN=ITIH1 PE=1 SV=3	105	0.496383		P19827	101 kDa	20
41	Inter-alpha-trypsin inhibitor heavy chain H2 OS=Homo sapiens GN=ITIH2 PE=1 SV=2	104	0.491656		P19823 (+1)	106 kDa	23
42	Complement component C8 beta chain OS=Homo sapiens GN=C8B PE=1 SV=3	103	0.486929		P07358	67 kDa	21
43	Ig alpha-1 chain C region OS=Homo sapiens GN=IGHA1 PE=1 SV=2	103	0.486929		P01876	38 kDa	13
44	Complement factor H-related protein 5 OS=Homo sapiens GN=CFHR5 PE=1 SV=1	91	0.430199		Q9BXR6	64 kDa	22
45	Alpha-1-antitrypsin OS=Homo sapiens GN=SERPINA1 PE=1 SV=3	90	0.425472		P01009	47 kDa	21
46	Coagulation factor X OS=Homo sapiens GN=F10 PE=1 SV=2	90	0.425472		P00742	55 kDa	14
47	Plasma serine protease inhibitor OS=Homo sapiens GN=SERPINA5 PE=1 SV=3	90	0.425472		P05154	46 kDa	15
48	Protein S100-A9 OS=Homo sapiens GN=S100A9 PE=1 SV=1	90	0.425472		P06702	13 kDa	6
49	Complement C5 OS=Homo sapiens GN=C5 PE=1 SV=4	88	0.416017		P01031	188 kDa	42
50	Immunoglobulin lambda-like polypeptide 5 OS=Homo sapiens GN=IGLL5 PE=1 SV=1	84	0.397107		A0A087WYR4	25 kDa	10
51	Beta-2-glycoprotein 1 OS=Homo sapiens GN=APOH PE=1 SV=3	78	0.368742		P02749	38 kDa	14
52	Serpin B3 OS=Homo sapiens GN=SERPINB3 PE=1 SV=2	73	0.345105		P29508	45 kDa	23
53	Selenoprotein P OS=Homo sapiens GN=SEPP1 PE=1 SV=3	72	0.340377		P49908	43 kDa	9
54	Apolipoprotein A-IV OS=Homo sapiens GN=APOA4 PE=1 SV=3	69	0.326195		P06727	45 kDa	19
55	Serum amyloid P-component OS=Homo sapiens GN=APCS PE=1 SV=2	68	0.321467		P02743	25 kDa	7
56	Cytochrome c (Fragment) OS=Homo sapiens GN=CYCS PE=1 SV=1	63	0.29783		C9JFR7 (+1)	11 kDa	3
57	Complement component C9 OS=Homo sapiens GN=C9 PE=1 SV=2	62	0.293103		P02748	63 kDa	17
58	Complement factor H-related protein 2 OS=Homo sapiens GN=CFHR2 PE=1 SV=1	61	0.288375		P36980	31 kDa	4
59	Ig alpha-2 chain C region OS=Homo sapiens GN=IGHA2 PE=1 SV=3	61	0.288375		P01877	37 kDa	2
60	Alpha-2-antiplasmin OS=Homo sapiens GN=SERPINF2 PE=1 SV=3	60	0.283648		P08697	55 kDa	13
61	Serpin B4 OS=Homo sapiens GN=SERPINB4 PE=1 SV=2	60	0.283648		P48594	45 kDa	4
62	Isoform 2 of Clusterin OS=Homo sapiens GN=CLU	57	0.269465		P10909-2	58 kDa	12
63	Isoform F of Proteoglycan 4 OS=Homo sapiens GN=PRG4	57	0.269465		Q92954-6	146 kDa	11
64	Desmoplakin OS=Homo sapiens GN=DSP PE=1 SV=3	55	0.26001		P15924	332 kDa	36
65	Heparin cofactor 2 OS=Homo sapiens GN=SERPIND1 PE=1 SV=3	55	0.26001		P05546	57 kDa	12
66	Complement component C8 alpha chain OS=Homo sapiens GN=C8A PE=1 SV=2	54	0.255283		P07357	65 kDa	17
67	Sulfhydryl oxidase 1 OS=Homo sapiens GN=QSOX1 PE=1 SV=3	53	0.250555		O00391	83 kDa	23
68	Tetranectin OS=Homo sapiens GN=CLEC3B PE=1 SV=3	51	0.241101		P05452	23 kDa	8
69	Inter-alpha-trypsin inhibitor heavy chain H4 OS=Homo sapiens GN=ITIH4 PE=1 SV=4	49	0.231646		Q14624	103 kDa	20
70	Apolipoprotein A-II OS=Homo sapiens GN=APOA2 PE=1 SV=1	48	0.226918		P02652 (+1)	11 kDa	5
71	Complement C1q subcomponent subunit A OS=Homo sapiens GN=C1QA PE=1 SV=2	48	0.226918		P02745	26 kDa	10
72	Haptoglobin-related protein OS=Homo sapiens GN=HPR PE=2 SV=2	48	0.226918		P00739 (+1)	39 kDa	16
73	Haptoglobin OS=Homo sapiens GN=HP PE=1 SV=1	46	0.217463		P00738 (+2)	45 kDa	8
74	Complement component C8 gamma chain OS=Homo sapiens GN=C8G PE=1 SV=3	43	0.203281		P07360	22 kDa	10
75	Protein S100-A7 OS=Homo sapiens GN=S100A7 PE=1 SV=4	39	0.184371		P31151	11 kDa	6
76	Coagulation factor IX OS=Homo sapiens GN=F9 PE=1 SV=2	38	0.179644		P00740	52 kDa	9
77	Vitamin K-dependent protein S OS=Homo sapiens GN=PROS1 PE=1 SV=1	37	0.174916		P07225	75 kDa	11
78	Hepatocyte growth factor activator OS=Homo sapiens GN=HGFAC PE=1 SV=1	36	0.170189		D6RAR4 (+1)	71 kDa	9
79	Mannan-binding lectin serine protease 1 OS=Homo sapiens GN=MASP1 PE=1 SV=3	36	0.170189		P48740	79 kDa	12
80	Carboxypeptidase N catalytic chain OS=Homo sapiens GN=CPN1 PE=1 SV=1	33	0.156006		P15169	52 kDa	11
81	Transthyretin OS=Homo sapiens GN=TTR PE=1 SV=1	33	0.156006		P02766	16 kDa	7
82	Procollagen C-endopeptidase enhancer 1 OS=Homo sapiens GN=PCOLCE PE=1 SV=2	32	0.151279		Q15113	48 kDa	11
83	Protein IGHV3-74 (Fragment) OS=Homo sapiens GN=IGHV3-74 PE=1 SV=1	32	0.151279		A0A0B4J1X5	13 kDa	3
84	Ig kappa chain V-III region HAH OS=Homo sapiens PE=2 SV=1	31	0.146551		P18135	14 kDa	4
85	Insulin-like growth factor-binding protein 3 OS=Homo sapiens GN=IGFBP3 PE=1 SV=2	31	0.146551		P17936 (+1)	32 kDa	12
86	Isoform 2 of Complement factor H-related protein 3 OS=Homo sapiens GN=CFHR3	31	0.146551		Q02985-2	31 kDa	5
87	Insulin-like growth factor-binding protein complex acid labile subunit OS=Homo sapiens GN=IGFALS PE=1 SV=1	30	0.141824		P35858 (+1)	66 kDa	11
88	Apolipoprotein D (Fragment) OS=Homo sapiens GN=APOD PE=1 SV=1	29	0.137096		C9JF17 (+1)	24 kDa	6
89	CD5 antigen-like OS=Homo sapiens GN=CD5L PE=1 SV=1	29	0.137096		O43866	38 kDa	11
90	Serotransferrin OS=Homo sapiens GN=TF PE=1 SV=3	28	0.132369		P02787	77 kDa	18
91	Ig delta chain C region OS=Homo sapiens GN=IGHD PE=1 SV=1	26	0.122914		A0A087WUS7	42 kDa	9
92	Isoform 2 of Annexin A2 OS=Homo sapiens GN=ANXA2	26	0.122914		P07355-2	40 kDa	13
93	Serum paraoxonase/arylesterase 1 OS=Homo sapiens GN=PON1 PE=1 SV=3	26	0.122914		P27169	40 kDa	8
94	Dermcidin OS=Homo sapiens GN=DCD PE=1 SV=2	25	0.118187		P81605	11 kDa	3
95	Properdin OS=Homo sapiens GN=CFP PE=1 SV=2	25	0.118187		P27918	51 kDa	11
96	Ceruloplasmin OS=Homo sapiens GN=CP PE=1 SV=1	23	0.108732		P00450	122 kDa	15
97	Junction plakoglobin OS=Homo sapiens GN=JUP PE=1 SV=3	23	0.108732		P14923	82 kDa	14
98	Apolipoprotein(a) OS=Homo sapiens GN=LPA PE=1 SV=1	22	0.104004		P08519	501 kDa	10
99	Hemoglobin subunit beta OS=Homo sapiens GN=HBB PE=1 SV=2	21	0.0992767		P68871	16 kDa	10
100	78 kDa glucose-regulated protein OS=Homo sapiens GN=HSPA5 PE=1 SV=2	20	0.0945492		P11021	72 kDa	8
101	Glyceraldehyde-3-phosphate dehydrogenase OS=Homo sapiens GN=GAPDH PE=1 SV=3	20	0.0945492		P04406	36 kDa	7
102	Hyaluronan-binding protein 2 OS=Homo sapiens GN=HABP2 PE=1 SV=1	20	0.0945492		Q14520	63 kDa	9
103	Protein AMBP OS=Homo sapiens GN=AMBP PE=1 SV=1	20	0.0945492		P02760	39 kDa	8
104	Lipopolysaccharide-binding protein OS=Homo sapiens GN=LBP PE=1 SV=3	19	0.0898218		P18428	53 kDa	8
105	Alpha-2-HS-glycoprotein OS=Homo sapiens GN=AHSG PE=1 SV=1	18	0.0850943		P02765	39 kDa	7
106	Fibrinogen beta chain OS=Homo sapiens GN=FGB PE=1 SV=2	18	0.0850943		P02675	56 kDa	10
107	Isoform 2 of C4b-binding protein beta chain OS=Homo sapiens GN=C4BPB	18	0.0850943		P20851-2	28 kDa	5
108	Lactotransferrin (Fragment) OS=Homo sapiens GN=LTF PE=1 SV=1	16	0.0756394		E7EQB2 (+2)	77 kDa	14
109	Actin, cytoplasmic 1 OS=Homo sapiens GN=ACTB PE=1 SV=1	15	0.0709119		P60709 (+1)	42 kDa	9
110	Cartilage acidic protein 1 OS=Homo sapiens GN=CRTAC1 PE=1 SV=1	15	0.0709119		A0A0C4DFP6 (+1)	70 kDa	13
111	Kallistatin OS=Homo sapiens GN=SERPINA4 PE=1 SV=3	15	0.0709119		P29622	49 kDa	12
112	N-acetylmuramoyl-L-alanine amidase OS=Homo sapiens GN=PGLYRP2 PE=1 SV=1	14	0.0661845		Q96PD5	62 kDa	8
113	Transforming growth factor-beta-induced protein ig-h3 OS=Homo sapiens GN=TGFBI PE=1 SV=1	14	0.0661845		Q15582	75 kDa	12
114	Complement component C6 OS=Homo sapiens GN=C6 PE=1 SV=3	13	0.061457		P13671	105 kDa	7
115	Fatty acid-binding protein, epidermal OS=Homo sapiens GN=FABP5 PE=1 SV=3	13	0.061457		Q01469	15 kDa	5
116	Protein Z-dependent protease inhibitor OS=Homo sapiens GN=SERPINA10 PE=1 SV=1	13	0.061457		G3V2W1	55 kDa	4
117	Vitamin K-dependent protein C OS=Homo sapiens GN=PROC PE=1 SV=1	13	0.061457		P04070	52 kDa	5
118	Alpha-2-macroglobulin-like protein 1 OS=Homo sapiens GN=A2ML1 PE=1 SV=3	12	0.0567295		A8K2U0	161 kDa	6
119	Complement component C7 OS=Homo sapiens GN=C7 PE=1 SV=2	12	0.0567295		P10643	94 kDa	11
120	Fibrinogen gamma chain OS=Homo sapiens GN=FGG PE=1 SV=3	12	0.0567295		P02679 (+3)	52 kDa	7
121	Protein IGHV4-34 (Fragment) OS=Homo sapiens GN=IGHV4-34 PE=1 SV=1	12	0.0567295		A0A0A0MS12	14 kDa	3
122	Protein IGHV5-51 (Fragment) OS=Homo sapiens GN=IGHV5-51 PE=1 SV=1	12	0.0567295		A0A0C4DH38	13 kDa	3
123	Alpha-enolase OS=Homo sapiens GN=ENO1 PE=1 SV=2	11	0.0520021		P06733	47 kDa	8
124	Arginase-1 OS=Homo sapiens GN=ARG1 PE=1 SV=2	11	0.0520021		P05089	35 kDa	9
125	Complement factor I OS=Homo sapiens GN=CFI PE=1 SV=1	11	0.0520021		E7ETH0 (+2)	67 kDa	8
126	Fructose-bisphosphate aldolase OS=Homo sapiens GN=ALDOA PE=1 SV=1	11	0.0520021		J3KPS3 (+2)	40 kDa	9
127	Ig lambda chain V-I region WAH OS=Homo sapiens PE=1 SV=1	11	0.0520021		P04208	12 kDa	2
128	Isoform 6 of Prelamin-A/C OS=Homo sapiens GN=LMNA	11	0.0520021		P02545-6	69 kDa	11
129	Ficolin-3 OS=Homo sapiens GN=FCN3 PE=1 SV=2	10	0.0472746		O75636	33 kDa	4
130	Isoform M1 of Pyruvate kinase PKM OS=Homo sapiens GN=PKM	10	0.0472746		P14618-2	58 kDa	6
131	Malate dehydrogenase, mitochondrial OS=Homo sapiens GN=MDH2 PE=1 SV=3	10	0.0472746		P40926	36 kDa	8
132	Secreted phosphoprotein 24 OS=Homo sapiens GN=SPP2 PE=1 SV=1	10	0.0472746		Q13103	24 kDa	6
133	Alpha-1-antichymotrypsin OS=Homo sapiens GN=SERPINA3 PE=1 SV=2	9	0.0425472		P01011	48 kDa	5
134	Caspase-14 OS=Homo sapiens GN=CASP14 PE=1 SV=2	9	0.0425472		P31944	28 kDa	7
135	Hepatocyte growth factor-like protein OS=Homo sapiens GN=MST1 PE=1 SV=1	9	0.0425472		G3XAK1 (+1)	82 kDa	7
136	Hornerin OS=Homo sapiens GN=HRNR PE=1 SV=2	9	0.0425472		Q86YZ3	282 kDa	3
137	Lysozyme C OS=Homo sapiens GN=LYZ PE=1 SV=1	9	0.0425472		P61626	17 kDa	7
138	Multiple inositol polyphosphate phosphatase 1 OS=Homo sapiens GN=MINPP1 PE=1 SV=1	9	0.0425472		Q9UNW1	55 kDa	7
139	Protein IGLV3-19 (Fragment) OS=Homo sapiens GN=IGLV3-19 PE=1 SV=1	9	0.0425472		A0A075B6J8	12 kDa	4
140	Angiotensinogen OS=Homo sapiens GN=AGT PE=1 SV=1	8	0.0378197		P01019	53 kDa	5
141	Cathelicidin antimicrobial peptide OS=Homo sapiens GN=CAMP PE=1 SV=1	8	0.0378197		J3KNB4 (+1)	20 kDa	6
142	Desmoglein-1 OS=Homo sapiens GN=DSG1 PE=1 SV=2	8	0.0378197		Q02413	114 kDa	8
143	Fibronectin OS=Homo sapiens GN=FN1 PE=1 SV=4	8	0.0378197		P02751 (+6)	263 kDa	7
144	Ig kappa chain V-IV region JI OS=Homo sapiens PE=4 SV=1	8	0.0378197		P06313	15 kDa	3
145	Vinculin OS=Homo sapiens GN=VCL PE=1 SV=4	8	0.0378197		P18206 (+1)	124 kDa	6
146	Apolipoprotein C-IV OS=Homo sapiens GN=APOC4 PE=1 SV=1	7	0.0330922		P55056	15 kDa	4
147	Cathepsin D OS=Homo sapiens GN=CTSD PE=1 SV=1	7	0.0330922		P07339	45 kDa	6
148	Fibulin-1 OS=Homo sapiens GN=FBLN1 PE=1 SV=1	7	0.0330922		B1AHL2 (+1)	78 kDa	6
149	Glutathione peroxidase OS=Homo sapiens GN=GPX3 PE=1 SV=1	7	0.0330922		A0A087X1J7 (+1)	25 kDa	3
150	Insulin-like growth factor-binding protein 2 OS=Homo sapiens GN=IGFBP2 PE=1 SV=2	7	0.0330922		P18065	35 kDa	4
151	Isoform 3 of Collagen alpha-1(XVIII) chain OS=Homo sapiens GN=COL18A1	7	0.0330922		P39060-2	136 kDa	5
152	L-lactate dehydrogenase A chain OS=Homo sapiens GN=LDHA PE=1 SV=2	7	0.0330922		P00338 (+1)	37 kDa	4
153	Peroxiredoxin-2 OS=Homo sapiens GN=PRDX2 PE=1 SV=5	7	0.0330922		P32119	22 kDa	3
154	Protein-glutamine gamma-glutamyltransferase E OS=Homo sapiens GN=TGM3 PE=1 SV=4	7	0.0330922		Q08188	77 kDa	5
155	Coagulation factor VII OS=Homo sapiens GN=F7 PE=1 SV=2	6	0.0283648		F5H8B0 (+2)	42 kDa	4
156	Complement factor D OS=Homo sapiens GN=CFD PE=1 SV=1	6	0.0283648		K7ERG9	28 kDa	3
157	Filaggrin OS=Homo sapiens GN=FLG PE=1 SV=3	6	0.0283648		P20930	435 kDa	4
158	Ig kappa chain V-II region TEW OS=Homo sapiens PE=1 SV=1	6	0.0283648		P01617	12 kDa	3
159	Peroxiredoxin-1 (Fragment) OS=Homo sapiens GN=PRDX1 PE=1 SV=1	6	0.0283648		A0A0A0MSI0 (+1)	19 kDa	4
160	Protein APOC4-APOC2 OS=Homo sapiens GN=APOC4-APOC2 PE=4 SV=1	6	0.0283648		K7ER74	20 kDa	2
161	Protein IGHV3-49 OS=Homo sapiens GN=IGHV3-49 PE=1 SV=1	6	0.0283648		A0A087WU91 (+1)	12 kDa	2
162	Protein IGLV3-21 (Fragment) OS=Homo sapiens GN=IGLV3-21 PE=1 SV=1	6	0.0283648		A0A075B6J7	12 kDa	3
163	Protein IGLV3-25 (Fragment) OS=Homo sapiens GN=IGLV3-25 PE=1 SV=2	6	0.0283648		A0A075B6J4	12 kDa	2
164	Protein JCHAIN (Fragment) OS=Homo sapiens GN=JCHAIN PE=1 SV=5	6	0.0283648		D6RD17 (+1)	18 kDa	3
165	Vitamin D-binding protein OS=Homo sapiens GN=GC PE=1 SV=1	6	0.0283648		D6RF35	53 kDa	6
166	Angiogenin OS=Homo sapiens GN=ANG PE=1 SV=1	5	0.0236373		P03950	17 kDa	3
167	C-reactive protein OS=Homo sapiens GN=CRP PE=1 SV=1	5	0.0236373		P02741	25 kDa	3
168	Carboxypeptidase A4 OS=Homo sapiens GN=CPA4 PE=1 SV=1	5	0.0236373		B7Z5J4 (+2)	36 kDa	5
169	Cornifin-A OS=Homo sapiens GN=SPRR1A PE=1 SV=2	5	0.0236373		P35321	10 kDa	4
170	Desmocollin-1 OS=Homo sapiens GN=DSC1 PE=1 SV=2	5	0.0236373		Q08554	100 kDa	4
171	Ficolin-1 OS=Homo sapiens GN=FCN1 PE=1 SV=2	5	0.0236373		O00602	35 kDa	5
172	Hemopexin OS=Homo sapiens GN=HPX PE=1 SV=2	5	0.0236373		P02790	52 kDa	3
173	Isoform 2 of Apolipoprotein M OS=Homo sapiens GN=APOM	5	0.0236373		O95445-2	13 kDa	4
174	Nicotinate phosphoribosyltransferase (Fragment) OS=Homo sapiens GN=NAPRT PE=1 SV=1	5	0.0236373		H0YDA6	14 kDa	2
175	Phosphatidylinositol-glycan-specific phospholipase D OS=Homo sapiens GN=GPLD1 PE=1 SV=3	5	0.0236373		P80108	92 kDa	4
176	Pigment epithelium-derived factor OS=Homo sapiens GN=SERPINF1 PE=1 SV=4	5	0.0236373		P36955	46 kDa	4
177	Small proline-rich protein 2D OS=Homo sapiens GN=SPRR2D PE=2 SV=2	5	0.0236373		P22532	8 kDa	4
178	Ubiquitin-60S ribosomal protein L40 OS=Homo sapiens GN=UBA52 PE=1 SV=2	5	0.0236373		P62987	15 kDa	3
179	Annexin A3 OS=Homo sapiens GN=ANXA3 PE=1 SV=3	4	0.0189098		P12429	36 kDa	3
180	Calmodulin-like protein 5 OS=Homo sapiens GN=CALML5 PE=1 SV=2	4	0.0189098		Q9NZT1	16 kDa	4
181	Calsyntenin-1 OS=Homo sapiens GN=CLSTN1 PE=1 SV=1	4	0.0189098		O94985 (+1)	110 kDa	3
182	Carboxypeptidase N subunit 2 OS=Homo sapiens GN=CPN2 PE=1 SV=3	4	0.0189098		P22792	61 kDa	3
183	Cathepsin L2 OS=Homo sapiens GN=CTSV PE=1 SV=2	4	0.0189098		O60911	37 kDa	4
184	Creatine kinase U-type, mitochondrial OS=Homo sapiens GN=CKMT1A PE=1 SV=1	4	0.0189098		P12532 (+1)	47 kDa	4
185	Filaggrin-2 OS=Homo sapiens GN=FLG2 PE=1 SV=1	4	0.0189098		Q5D862	248 kDa	2
186	Flavin reductase (NADPH) OS=Homo sapiens GN=BLVRB PE=1 SV=3	4	0.0189098		P30043	22 kDa	4
187	Galectin-7 OS=Homo sapiens GN=LGALS7 PE=1 SV=2	4	0.0189098		P47929	15 kDa	3
188	Glutamine synthetase OS=Homo sapiens GN=GLUL PE=1 SV=4	4	0.0189098		P15104	42 kDa	4
189	Ig kappa chain V-III region B6 OS=Homo sapiens PE=1 SV=1	4	0.0189098		P01619	12 kDa	2
190	Insulin-like growth factor-binding protein 4 OS=Homo sapiens GN=IGFBP4 PE=1 SV=2	4	0.0189098		P22692	28 kDa	3
191	Insulin-like growth factor-binding protein 7 OS=Homo sapiens GN=IGFBP7 PE=1 SV=1	4	0.0189098		Q16270 (+1)	29 kDa	4
192	Isoform 2 of Serpin B12 OS=Homo sapiens GN=SERPINB12	4	0.0189098		Q96P63-2	48 kDa	3
193	Keratinocyte proline-rich protein OS=Homo sapiens GN=KPRP PE=1 SV=1	4	0.0189098		Q5T749	64 kDa	4
194	Neutrophil gelatinase-associated lipocalin OS=Homo sapiens GN=LCN2 PE=1 SV=2	4	0.0189098		P80188 (+1)	23 kDa	3
195	Plakophilin-1 OS=Homo sapiens GN=PKP1 PE=1 SV=1	4	0.0189098		A0A087WYY6	81 kDa	3
196	Prenylcysteine oxidase 1 OS=Homo sapiens GN=PCYOX1 PE=1 SV=3	4	0.0189098		Q9UHG3	57 kDa	3
197	Retinoic acid receptor responder protein 2 OS=Homo sapiens GN=RARRES2 PE=1 SV=1	4	0.0189098		Q99969	19 kDa	3
198	Adipocyte plasma membrane-associated protein (Fragment) OS=Homo sapiens GN=APMAP PE=1 SV=1	3	0.0141824		H0Y512	45 kDa	3
199	Angiopoietin-related protein 3 OS=Homo sapiens GN=ANGPTL3 PE=1 SV=1	3	0.0141824		Q9Y5C1	54 kDa	3
200	Cadherin-1 OS=Homo sapiens GN=CDH1 PE=1 SV=1	3	0.0141824		H3BNC6	59 kDa	3
201	Calmodulin-like protein 3 OS=Homo sapiens GN=CALML3 PE=1 SV=2	3	0.0141824		P27482	17 kDa	3
202	Cathepsin S OS=Homo sapiens GN=CTSS PE=1 SV=3	3	0.0141824		P25774	37 kDa	3
203	Cystatin-A OS=Homo sapiens GN=CSTA PE=1 SV=1	3	0.0141824		P01040	11 kDa	3
204	Fibrinogen alpha chain OS=Homo sapiens GN=FGA PE=1 SV=2	3	0.0141824		P02671 (+1)	95 kDa	3
205	Filamin-A OS=Homo sapiens GN=FLNA PE=1 SV=4	3	0.0141824		P21333 (+2)	281 kDa	3
206	Ganglioside GM2 activator OS=Homo sapiens GN=GM2A PE=1 SV=4	3	0.0141824		P17900	21 kDa	3
207	Hemoglobin subunit alpha OS=Homo sapiens GN=HBA1 PE=1 SV=2	3	0.0141824		P69905	15 kDa	2
208	Histone H4 OS=Homo sapiens GN=HIST1H4A PE=1 SV=2	3	0.0141824		P62805	11 kDa	3
209	IgGFc-binding protein OS=Homo sapiens GN=FCGBP PE=1 SV=1	3	0.0141824		A0A087WXI2 (+1)	445 kDa	3
210	Peptidyl-prolyl cis-trans isomerase A OS=Homo sapiens GN=PPIA PE=1 SV=2	3	0.0141824		P62937	18 kDa	3
211	Platelet factor 4 OS=Homo sapiens GN=PF4 PE=1 SV=2	3	0.0141824		P02776	11 kDa	2
212	Ribonuclease 4 OS=Homo sapiens GN=RNASE4 PE=1 SV=3	3	0.0141824		P34096	17 kDa	3
213	Triosephosphate isomerase OS=Homo sapiens GN=TPI1 PE=1 SV=3	3	0.0141824		P60174	31 kDa	3
214	14-3-3 protein sigma OS=Homo sapiens GN=SFN PE=1 SV=1	2	0.00945492		P31947 (+1)	28 kDa	2
215	Alpha-1B-glycoprotein OS=Homo sapiens GN=A1BG PE=1 SV=4	2	0.00945492		P04217	54 kDa	2
216	Apolipoprotein A-V OS=Homo sapiens GN=APOA5 PE=1 SV=1	2	0.00945492		Q6Q788	41 kDa	2
217	Chondroadherin OS=Homo sapiens GN=CHAD PE=2 SV=2	2	0.00945492		O15335	40 kDa	2
218	Elongation factor 1-alpha 1 OS=Homo sapiens GN=EEF1A1 PE=1 SV=1	2	0.00945492		P68104 (+1)	50 kDa	2
219	Inter-alpha-trypsin inhibitor heavy chain H3 OS=Homo sapiens GN=ITIH3 PE=1 SV=2	2	0.00945492		Q06033	100 kDa	2
220	Platelet basic protein OS=Homo sapiens GN=PPBP PE=1 SV=3	2	0.00945492		P02775	14 kDa	2
		21153	100

## Sheet: B1400 Repetition 2
Number	Identified Proteins	Spectrum Count B1400 N°2	Relative abundance (%)	Sum	Accession Number	Molecular Weight	Peptide count
1	Apolipoprotein B-100 OS=Homo sapiens GN=APOB PE=1 SV=2	2927	11.1056		P04114	516 kDa	261
2	Complement C3 OS=Homo sapiens GN=C3 PE=1 SV=2	1824	6.92063	26356	P01024	187 kDa	125
3	Serum albumin OS=Homo sapiens GN=ALB PE=1 SV=2	1306	4.95523		P02768	69 kDa	69
4	Complement C4-A OS=Homo sapiens GN=C4A PE=1 SV=2	1267	4.80725		P0C0L4	193 kDa	101
5	Apolipoprotein A-I OS=Homo sapiens GN=APOA1 PE=1 SV=1	1108	4.20398		P02647	31 kDa	38
6	Prothrombin OS=Homo sapiens GN=F2 PE=1 SV=2	916	3.47549		P00734	70 kDa	46
7	Plasminogen OS=Homo sapiens GN=PLG PE=1 SV=2	893	3.38822		P00747	91 kDa	77
8	Antithrombin-III OS=Homo sapiens GN=SERPINC1 PE=1 SV=1	797	3.02398		P01008	53 kDa	37
9	Vitronectin OS=Homo sapiens GN=VTN PE=1 SV=1	796	3.02019		P04004	54 kDa	39
10	Apolipoprotein E OS=Homo sapiens GN=APOE PE=1 SV=1	710	2.69388		P02649	36 kDa	32
11	Complement factor H OS=Homo sapiens GN=CFH PE=1 SV=4	706	2.67871		P08603	139 kDa	74
12	Histidine-rich glycoprotein OS=Homo sapiens GN=HRG PE=1 SV=1	703	2.66732		P04196	60 kDa	46
13	C4b-binding protein alpha chain OS=Homo sapiens GN=C4BPA PE=1 SV=2	610	2.31446		P04003	67 kDa	38
14	Kininogen-1 OS=Homo sapiens GN=KNG1 PE=1 SV=2	569	2.1589		P01042	72 kDa	42
15	Isoform LMW of Kininogen-1 OS=Homo sapiens GN=KNG1	558	2.11716		P01042-2	48 kDa	2
16	Plasma protease C1 inhibitor OS=Homo sapiens GN=SERPING1 PE=1 SV=2	516	1.95781		P05155	55 kDa	23
17	Coagulation factor XII OS=Homo sapiens GN=F12 PE=1 SV=3	468	1.77569		P00748	68 kDa	43
18	Alpha-2-macroglobulin OS=Homo sapiens GN=A2M PE=1 SV=3	442	1.67704		P01023	163 kDa	56
19	Plasma kallikrein OS=Homo sapiens GN=KLKB1 PE=1 SV=1	436	1.65427		P03952	71 kDa	46
20	Ig gamma-3 chain C region OS=Homo sapiens GN=IGHG3 PE=1 SV=1	327	1.2407		A0A087WXL8	57 kDa	27
21	Ig gamma-1 chain C region OS=Homo sapiens GN=IGHG1 PE=1 SV=1	311	1.18		A0A087WV47	51 kDa	3
22	Ig mu chain C region OS=Homo sapiens GN=IGHM PE=1 SV=1	307	1.16482		A0A087X2C0	64 kDa	23
23	Ig gamma-1 chain C region OS=Homo sapiens GN=IGHG1 PE=1 SV=1	298	1.13067		A0A087WYE1	52 kDa	11
24	Complement C1q subcomponent subunit C OS=Homo sapiens GN=C1QC PE=1 SV=3	270	1.02443		P02747	26 kDa	7
25	Gelsolin OS=Homo sapiens GN=GSN PE=1 SV=1	270	1.02443		P06396	86 kDa	33
26	Ig kappa chain C region OS=Homo sapiens GN=IGKC PE=1 SV=1	256	0.971316		A0A087X130	25 kDa	3
27	Protein IGKV3-11 OS=Homo sapiens GN=IGKV3-11 PE=4 SV=1	255	0.967522		A0A087WZW8	26 kDa	19
28	Protein IGKV1-8 OS=Homo sapiens GN=IGKV1-8 PE=4 SV=1	252	0.956139		A0A087WWV8	26 kDa	3
29	Complement C1q subcomponent subunit B OS=Homo sapiens GN=C1QB PE=1 SV=1	242	0.918197		D6R934 (+1)	26 kDa	11
30	Coagulation factor V OS=Homo sapiens GN=F5 PE=1 SV=1	204	0.774017		A0A0A0MRJ7 (+1)	252 kDa	48
31	Ig gamma-2 chain C region OS=Homo sapiens GN=IGHG2 PE=1 SV=2	192	0.728487		P01859	36 kDa	4
32	Complement factor H-related protein 1 OS=Homo sapiens GN=CFHR1 PE=1 SV=2	185	0.701927		Q03591	38 kDa	8
33	Carboxypeptidase B2 OS=Homo sapiens GN=CPB2 PE=1 SV=2	179	0.679162		Q96IY4	48 kDa	18
34	Inter-alpha-trypsin inhibitor heavy chain H2 OS=Homo sapiens GN=ITIH2 PE=1 SV=2	167	0.633632		P19823 (+1)	106 kDa	28
35	Uncharacterized protein OS=Homo sapiens PE=1 SV=1	165	0.626043		B4E1Z4	141 kDa	30
36	Complement C1r subcomponent OS=Homo sapiens GN=C1R PE=1 SV=1	154	0.584307		B4DPQ0	82 kDa	30
37	Serum amyloid A-4 protein OS=Homo sapiens GN=SAA4 PE=1 SV=2	148	0.561542		P35542	15 kDa	8
38	Coagulation factor XI OS=Homo sapiens GN=F11 PE=1 SV=1	143	0.542571		P03951	70 kDa	28
39	Inter-alpha-trypsin inhibitor heavy chain H1 OS=Homo sapiens GN=ITIH1 PE=1 SV=3	135	0.512217		P19827	101 kDa	22
40	Ig alpha-1 chain C region OS=Homo sapiens GN=IGHA1 PE=1 SV=2	127	0.481864		P01876	38 kDa	14
41	Isoform 2 of Apolipoprotein L1 OS=Homo sapiens GN=APOL1	127	0.481864		O14791-2	46 kDa	19
42	Coagulation factor X OS=Homo sapiens GN=F10 PE=1 SV=2	120	0.455304		P00742	55 kDa	14
43	Complement C1s subcomponent OS=Homo sapiens GN=C1S PE=1 SV=1	116	0.440127		P09871	77 kDa	22
44	Alpha-1-antitrypsin OS=Homo sapiens GN=SERPINA1 PE=1 SV=3	114	0.432539		P01009	47 kDa	25
45	Beta-2-glycoprotein 1 OS=Homo sapiens GN=APOH PE=1 SV=3	110	0.417362		P02749	38 kDa	16
46	Complement C5 OS=Homo sapiens GN=C5 PE=1 SV=4	110	0.417362		P01031	188 kDa	41
47	Apolipoprotein C-I (Fragment) OS=Homo sapiens GN=APOC1 PE=1 SV=1	102	0.387009		K7ERI9 (+1)	9 kDa	9
48	Complement factor H-related protein 5 OS=Homo sapiens GN=CFHR5 PE=1 SV=1	97	0.368038		Q9BXR6	64 kDa	22
49	Plasma serine protease inhibitor OS=Homo sapiens GN=SERPINA5 PE=1 SV=3	96	0.364243		P05154	46 kDa	16
50	Complement component C8 beta chain OS=Homo sapiens GN=C8B PE=1 SV=3	91	0.345272		P07358	67 kDa	19
51	Immunoglobulin lambda-like polypeptide 5 OS=Homo sapiens GN=IGLL5 PE=1 SV=1	89	0.337684		A0A087WYR4	25 kDa	8
52	Ig alpha-2 chain C region OS=Homo sapiens GN=IGHA2 PE=1 SV=3	88	0.33389		P01877	37 kDa	2
53	Selenoprotein P OS=Homo sapiens GN=SEPP1 PE=1 SV=3	82	0.311125		P49908	43 kDa	11
54	Serum amyloid P-component OS=Homo sapiens GN=APCS PE=1 SV=2	81	0.30733		P02743	25 kDa	9
55	Heparin cofactor 2 OS=Homo sapiens GN=SERPIND1 PE=1 SV=3	80	0.303536		P05546	57 kDa	15
56	Apolipoprotein A-IV OS=Homo sapiens GN=APOA4 PE=1 SV=3	76	0.288359		P06727	45 kDa	21
57	Complement component C9 OS=Homo sapiens GN=C9 PE=1 SV=2	76	0.288359		P02748	63 kDa	18
58	Coagulation factor IX OS=Homo sapiens GN=F9 PE=1 SV=2	72	0.273183		P00740	52 kDa	14
59	Sulfhydryl oxidase 1 OS=Homo sapiens GN=QSOX1 PE=1 SV=3	65	0.246623		O00391	83 kDa	26
60	Complement factor H-related protein 2 OS=Homo sapiens GN=CFHR2 PE=1 SV=1	62	0.235241		P36980	31 kDa	2
61	Vitamin K-dependent protein S OS=Homo sapiens GN=PROS1 PE=1 SV=1	60	0.227652		P07225	75 kDa	15
62	Isoform 2 of Clusterin OS=Homo sapiens GN=CLU	59	0.223858		P10909-2	58 kDa	13
63	Isoform F of Proteoglycan 4 OS=Homo sapiens GN=PRG4	59	0.223858		Q92954-6	146 kDa	12
64	Alpha-2-antiplasmin OS=Homo sapiens GN=SERPINF2 PE=1 SV=3	57	0.21627		P08697	55 kDa	15
65	Haptoglobin-related protein OS=Homo sapiens GN=HPR PE=2 SV=2	57	0.21627		P00739 (+1)	39 kDa	15
66	Complement C1q subcomponent subunit A OS=Homo sapiens GN=C1QA PE=1 SV=2	56	0.212475		P02745	26 kDa	9
67	Apolipoprotein(a) OS=Homo sapiens GN=LPA PE=1 SV=1	55	0.208681		P08519	501 kDa	16
68	Complement component C8 alpha chain OS=Homo sapiens GN=C8A PE=1 SV=2	54	0.204887		P07357	65 kDa	16
69	Haptoglobin OS=Homo sapiens GN=HP PE=1 SV=1	52	0.197299		P00738 (+2)	45 kDa	7
70	Serotransferrin OS=Homo sapiens GN=TF PE=1 SV=3	52	0.197299		P02787	77 kDa	26
71	Tetranectin OS=Homo sapiens GN=CLEC3B PE=1 SV=3	52	0.197299		P05452	23 kDa	7
72	Ig kappa chain V-III region HAH OS=Homo sapiens PE=2 SV=1	49	0.185916		P18135	14 kDa	7
73	Transthyretin OS=Homo sapiens GN=TTR PE=1 SV=1	47	0.178328		P02766	16 kDa	10
74	Hepatocyte growth factor activator OS=Homo sapiens GN=HGFAC PE=1 SV=1	44	0.166945		D6RAR4 (+1)	71 kDa	11
75	Protein IGHV3-74 (Fragment) OS=Homo sapiens GN=IGHV3-74 PE=1 SV=1	44	0.166945		A0A0B4J1X5	13 kDa	3
76	Complement component C8 gamma chain OS=Homo sapiens GN=C8G PE=1 SV=3	41	0.155562		P07360	22 kDa	9
77	Insulin-like growth factor-binding protein complex acid labile subunit OS=Homo sapiens GN=IGFALS PE=1 SV=1	41	0.155562		P35858 (+1)	66 kDa	16
78	Inter-alpha-trypsin inhibitor heavy chain H4 OS=Homo sapiens GN=ITIH4 PE=1 SV=4	41	0.155562		Q14624	103 kDa	16
79	Apolipoprotein D (Fragment) OS=Homo sapiens GN=APOD PE=1 SV=1	37	0.140385		C9JF17 (+1)	24 kDa	6
80	Apolipoprotein A-II OS=Homo sapiens GN=APOA2 PE=1 SV=1	35	0.132797		P02652 (+1)	11 kDa	6
81	Insulin-like growth factor-binding protein 3 OS=Homo sapiens GN=IGFBP3 PE=1 SV=2	35	0.132797		P17936 (+1)	32 kDa	10
82	Isoform 2 of C4b-binding protein beta chain OS=Homo sapiens GN=C4BPB	35	0.132797		P20851-2	28 kDa	6
83	Isoform 2 of Complement factor H-related protein 3 OS=Homo sapiens GN=CFHR3	35	0.132797		Q02985-2	31 kDa	7
84	Properdin OS=Homo sapiens GN=CFP PE=1 SV=2	35	0.132797		P27918	51 kDa	14
85	CD5 antigen-like OS=Homo sapiens GN=CD5L PE=1 SV=1	34	0.129003		O43866	38 kDa	12
86	Desmoplakin OS=Homo sapiens GN=DSP PE=1 SV=3	33	0.125209		P15924	332 kDa	24
87	Fibronectin OS=Homo sapiens GN=FN1 PE=1 SV=4	33	0.125209		P02751 (+6)	263 kDa	19
88	Carboxypeptidase N catalytic chain OS=Homo sapiens GN=CPN1 PE=1 SV=1	32	0.121414		P15169	52 kDa	12
89	Hyaluronan-binding protein 2 OS=Homo sapiens GN=HABP2 PE=1 SV=1	31	0.11762		Q14520	63 kDa	14
90	Ceruloplasmin OS=Homo sapiens GN=CP PE=1 SV=1	27	0.102443		P00450	122 kDa	14
91	Ig delta chain C region OS=Homo sapiens GN=IGHD PE=1 SV=1	26	0.0986493		A0A087WUS7	42 kDa	8
92	Protein AMBP OS=Homo sapiens GN=AMBP PE=1 SV=1	26	0.0986493		P02760	39 kDa	10
93	Vitamin K-dependent protein C OS=Homo sapiens GN=PROC PE=1 SV=1	25	0.0948551		P04070	52 kDa	9
94	78 kDa glucose-regulated protein OS=Homo sapiens GN=HSPA5 PE=1 SV=2	24	0.0910609		P11021	72 kDa	10
95	Mannan-binding lectin serine protease 1 OS=Homo sapiens GN=MASP1 PE=1 SV=3	24	0.0910609		P48740	79 kDa	8
96	Complement component C6 OS=Homo sapiens GN=C6 PE=1 SV=3	22	0.0834725		P13671	105 kDa	14
97	Dermcidin OS=Homo sapiens GN=DCD PE=1 SV=2	22	0.0834725		P81605	11 kDa	3
98	Hemoglobin subunit beta OS=Homo sapiens GN=HBB PE=1 SV=2	22	0.0834725		P68871	16 kDa	10
99	Procollagen C-endopeptidase enhancer 1 OS=Homo sapiens GN=PCOLCE PE=1 SV=2	22	0.0834725		Q15113	48 kDa	11
100	Actin, cytoplasmic 1 OS=Homo sapiens GN=ACTB PE=1 SV=1	21	0.0796783		P60709 (+1)	42 kDa	11
101	Serum paraoxonase/arylesterase 1 OS=Homo sapiens GN=PON1 PE=1 SV=3	21	0.0796783		P27169	40 kDa	8
102	Lactotransferrin (Fragment) OS=Homo sapiens GN=LTF PE=1 SV=1	20	0.075884		E7EQB2 (+2)	77 kDa	14
103	Fibrinogen beta chain OS=Homo sapiens GN=FGB PE=1 SV=2	19	0.0720898		P02675	56 kDa	11
104	Ig kappa chain V-IV region JI OS=Homo sapiens PE=4 SV=1	19	0.0720898		P06313	15 kDa	3
105	Protein Z-dependent protease inhibitor OS=Homo sapiens GN=SERPINA10 PE=1 SV=1	19	0.0720898		G3V2W1	55 kDa	7
106	Hornerin OS=Homo sapiens GN=HRNR PE=1 SV=2	18	0.0682956		Q86YZ3	282 kDa	5
107	Lipopolysaccharide-binding protein OS=Homo sapiens GN=LBP PE=1 SV=3	18	0.0682956		P18428	53 kDa	7
108	Secreted phosphoprotein 24 OS=Homo sapiens GN=SPP2 PE=1 SV=1	18	0.0682956		Q13103	24 kDa	8
109	Alpha-2-HS-glycoprotein OS=Homo sapiens GN=AHSG PE=1 SV=1	17	0.0645014		P02765	39 kDa	8
110	Cartilage acidic protein 1 OS=Homo sapiens GN=CRTAC1 PE=1 SV=1	16	0.0607072		A0A0C4DFP6 (+1)	70 kDa	12
111	N-acetylmuramoyl-L-alanine amidase OS=Homo sapiens GN=PGLYRP2 PE=1 SV=1	16	0.0607072		Q96PD5	62 kDa	8
112	Ficolin-3 OS=Homo sapiens GN=FCN3 PE=1 SV=2	15	0.056913		O75636	33 kDa	8
113	Transforming growth factor-beta-induced protein ig-h3 OS=Homo sapiens GN=TGFBI PE=1 SV=1	15	0.056913		Q15582	75 kDa	8
114	Cathelicidin antimicrobial peptide OS=Homo sapiens GN=CAMP PE=1 SV=1	14	0.0531188		J3KNB4 (+1)	20 kDa	9
115	Ig lambda chain V-I region WAH OS=Homo sapiens PE=1 SV=1	13	0.0493246		P04208	12 kDa	3
116	Kallistatin OS=Homo sapiens GN=SERPINA4 PE=1 SV=3	13	0.0493246		P29622	49 kDa	11
117	Complement component C7 OS=Homo sapiens GN=C7 PE=1 SV=2	11	0.0417362		P10643	94 kDa	11
118	Glutathione peroxidase OS=Homo sapiens GN=GPX3 PE=1 SV=1	11	0.0417362		A0A087X1J7 (+1)	25 kDa	4
119	Ig kappa chain V-II region TEW OS=Homo sapiens PE=1 SV=1	11	0.0417362		P01617	12 kDa	3
120	Isoform 2 of Apolipoprotein M OS=Homo sapiens GN=APOM	11	0.0417362		O95445-2	13 kDa	6
121	Junction plakoglobin OS=Homo sapiens GN=JUP PE=1 SV=3	11	0.0417362		P14923	82 kDa	9
122	Protein S100-A8 OS=Homo sapiens GN=S100A8 PE=1 SV=1	11	0.0417362		P05109	11 kDa	5
123	14-3-3 protein sigma OS=Homo sapiens GN=SFN PE=1 SV=1	10	0.037942		P31947 (+1)	28 kDa	7
124	Apolipoprotein C-IV OS=Homo sapiens GN=APOC4 PE=1 SV=1	10	0.037942		P55056	15 kDa	5
125	Coagulation factor VII OS=Homo sapiens GN=F7 PE=1 SV=2	10	0.037942		F5H8B0 (+2)	42 kDa	6
126	Epiplakin OS=Homo sapiens GN=EPPK1 PE=1 SV=2	10	0.037942		P58107	556 kDa	6
127	Histone H4 OS=Homo sapiens GN=HIST1H4A PE=1 SV=2	10	0.037942		P62805	11 kDa	5
128	Isoform M1 of Pyruvate kinase PKM OS=Homo sapiens GN=PKM	10	0.037942		P14618-2	58 kDa	5
129	Complement factor I OS=Homo sapiens GN=CFI PE=1 SV=1	9	0.0341478		E7ETH0 (+2)	67 kDa	8
130	Hepatocyte growth factor-like protein OS=Homo sapiens GN=MST1 PE=1 SV=1	9	0.0341478		G3XAK1 (+1)	82 kDa	8
131	Insulin-like growth factor-binding protein 2 OS=Homo sapiens GN=IGFBP2 PE=1 SV=2	9	0.0341478		P18065	35 kDa	6
132	Protein IGHV5-51 (Fragment) OS=Homo sapiens GN=IGHV5-51 PE=1 SV=1	9	0.0341478		A0A0C4DH38	13 kDa	3
133	Protein IGLV3-19 (Fragment) OS=Homo sapiens GN=IGLV3-19 PE=1 SV=1	9	0.0341478		A0A075B6J8	12 kDa	4
134	Serpin B3 OS=Homo sapiens GN=SERPINB3 PE=1 SV=2	9	0.0341478		P29508	45 kDa	8
135	V-set and immunoglobulin domain-containing protein 8 OS=Homo sapiens GN=VSIG8 PE=2 SV=1	9	0.0341478		Q5VU13	44 kDa	6
136	Fibrinogen gamma chain OS=Homo sapiens GN=FGG PE=1 SV=3	8	0.0303536		P02679 (+3)	52 kDa	6
137	Galectin-7 OS=Homo sapiens GN=LGALS7 PE=1 SV=2	8	0.0303536		P47929	15 kDa	4
138	Hemoglobin subunit alpha OS=Homo sapiens GN=HBA1 PE=1 SV=2	8	0.0303536		P69905	15 kDa	4
139	Isoform 2 of Annexin A2 OS=Homo sapiens GN=ANXA2	8	0.0303536		P07355-2	40 kDa	6
140	Isoform 3 of Collagen alpha-1(XVIII) chain OS=Homo sapiens GN=COL18A1	8	0.0303536		P39060-2	136 kDa	6
141	Protein APOC4-APOC2 OS=Homo sapiens GN=APOC4-APOC2 PE=4 SV=1	8	0.0303536		K7ER74	20 kDa	3
142	Alpha-enolase OS=Homo sapiens GN=ENO1 PE=1 SV=2	7	0.0265594		P06733	47 kDa	5
143	Calmodulin-like protein 5 OS=Homo sapiens GN=CALML5 PE=1 SV=2	7	0.0265594		Q9NZT1	16 kDa	5
144	Elongation factor 1-alpha 1 OS=Homo sapiens GN=EEF1A1 PE=1 SV=1	7	0.0265594		P68104 (+1)	50 kDa	4
145	Fibulin-1 OS=Homo sapiens GN=FBLN1 PE=1 SV=1	7	0.0265594		B1AHL2 (+1)	78 kDa	7
146	Glyceraldehyde-3-phosphate dehydrogenase OS=Homo sapiens GN=GAPDH PE=1 SV=3	7	0.0265594		P04406	36 kDa	3
147	Ig kappa chain V-III region B6 OS=Homo sapiens PE=1 SV=1	7	0.0265594		P01619	12 kDa	2
148	Insulin-like growth factor-binding protein 7 OS=Homo sapiens GN=IGFBP7 PE=1 SV=1	7	0.0265594		Q16270 (+1)	29 kDa	4
149	Multiple inositol polyphosphate phosphatase 1 OS=Homo sapiens GN=MINPP1 PE=1 SV=1	7	0.0265594		Q9UNW1	55 kDa	7
150	Pigment epithelium-derived factor OS=Homo sapiens GN=SERPINF1 PE=1 SV=4	7	0.0265594		P36955	46 kDa	6
151	Protein IGHV4-34 (Fragment) OS=Homo sapiens GN=IGHV4-34 PE=1 SV=1	7	0.0265594		A0A0A0MS12	14 kDa	2
152	Thrombospondin-1 OS=Homo sapiens GN=THBS1 PE=1 SV=2	7	0.0265594		P07996	129 kDa	4
153	Angiotensinogen OS=Homo sapiens GN=AGT PE=1 SV=1	6	0.0227652		P01019	53 kDa	4
154	Complement factor D OS=Homo sapiens GN=CFD PE=1 SV=1	6	0.0227652		K7ERG9	28 kDa	4
155	Desmoglein-1 OS=Homo sapiens GN=DSG1 PE=1 SV=2	6	0.0227652		Q02413	114 kDa	5
156	L-lactate dehydrogenase A chain OS=Homo sapiens GN=LDHA PE=1 SV=2	6	0.0227652		P00338 (+1)	37 kDa	4
157	Plakophilin-1 OS=Homo sapiens GN=PKP1 PE=1 SV=1	6	0.0227652		A0A087WYY6	81 kDa	3
158	Protein JCHAIN (Fragment) OS=Homo sapiens GN=JCHAIN PE=1 SV=5	6	0.0227652		D6RD17 (+1)	18 kDa	4
159	Protein S100-A9 OS=Homo sapiens GN=S100A9 PE=1 SV=1	6	0.0227652		P06702	13 kDa	4
160	Vitamin D-binding protein OS=Homo sapiens GN=GC PE=1 SV=1	6	0.0227652		D6RF35	53 kDa	6
161	Carboxypeptidase N subunit 2 OS=Homo sapiens GN=CPN2 PE=1 SV=3	5	0.018971		P22792	61 kDa	4
162	Endoplasmin OS=Homo sapiens GN=HSP90B1 PE=1 SV=1	5	0.018971		P14625	92 kDa	4
163	Heat shock protein beta-1 OS=Homo sapiens GN=HSPB1 PE=1 SV=2	5	0.018971		P04792	23 kDa	4
164	Hemopexin OS=Homo sapiens GN=HPX PE=1 SV=2	5	0.018971		P02790	52 kDa	3
165	Inter-alpha-trypsin inhibitor heavy chain H3 OS=Homo sapiens GN=ITIH3 PE=1 SV=2	5	0.018971		Q06033	100 kDa	4
166	Leucine-rich repeat-containing protein 15 OS=Homo sapiens GN=LRRC15 PE=2 SV=2	5	0.018971		Q8TF66 (+1)	64 kDa	5
167	Lysozyme C OS=Homo sapiens GN=LYZ PE=1 SV=1	5	0.018971		P61626	17 kDa	5
168	Peptidyl-prolyl cis-trans isomerase A OS=Homo sapiens GN=PPIA PE=1 SV=2	5	0.018971		P62937	18 kDa	3
169	Plectin OS=Homo sapiens GN=PLEC PE=1 SV=3	5	0.018971		Q15149	532 kDa	4
170	Protein IGLV3-21 (Fragment) OS=Homo sapiens GN=IGLV3-21 PE=1 SV=1	5	0.018971		A0A075B6J7	12 kDa	3
171	Retinoic acid receptor responder protein 2 OS=Homo sapiens GN=RARRES2 PE=1 SV=1	5	0.018971		Q99969	19 kDa	3
172	Alpha-1-antichymotrypsin OS=Homo sapiens GN=SERPINA3 PE=1 SV=2	4	0.0151768		P01011	48 kDa	2
173	Angiogenin OS=Homo sapiens GN=ANG PE=1 SV=1	4	0.0151768		P03950	17 kDa	3
174	Caspase-14 OS=Homo sapiens GN=CASP14 PE=1 SV=2	4	0.0151768		P31944	28 kDa	4
175	Chondroadherin OS=Homo sapiens GN=CHAD PE=2 SV=2	4	0.0151768		O15335	40 kDa	3
176	Creatine kinase M-type OS=Homo sapiens GN=CKM PE=1 SV=2	4	0.0151768		P06732	43 kDa	4
177	Fatty acid-binding protein, epidermal OS=Homo sapiens GN=FABP5 PE=1 SV=3	4	0.0151768		Q01469	15 kDa	4
178	Fibrinogen alpha chain OS=Homo sapiens GN=FGA PE=1 SV=2	4	0.0151768		P02671 (+1)	95 kDa	4
179	Flavin reductase (NADPH) OS=Homo sapiens GN=BLVRB PE=1 SV=3	4	0.0151768		P30043	22 kDa	4
180	Phosphatidylinositol-glycan-specific phospholipase D OS=Homo sapiens GN=GPLD1 PE=1 SV=3	4	0.0151768		P80108	92 kDa	4
181	Prenylcysteine oxidase 1 OS=Homo sapiens GN=PCYOX1 PE=1 SV=3	4	0.0151768		Q9UHG3	57 kDa	3
182	Protein IGHV3-49 OS=Homo sapiens GN=IGHV3-49 PE=1 SV=1	4	0.0151768		A0A087WU91 (+1)	12 kDa	2
183	Tubulin alpha-3C/D chain OS=Homo sapiens GN=TUBA3C PE=1 SV=3	4	0.0151768		Q13748 (+1)	50 kDa	3
184	Tubulin beta-4B chain OS=Homo sapiens GN=TUBB4B PE=1 SV=1	4	0.0151768		P68371	50 kDa	3
185	Ubiquitin-60S ribosomal protein L40 OS=Homo sapiens GN=UBA52 PE=1 SV=2	4	0.0151768		P62987	15 kDa	2
186	Adipocyte plasma membrane-associated protein (Fragment) OS=Homo sapiens GN=APMAP PE=1 SV=1	3	0.0113826		H0Y512	45 kDa	2
187	Alpha-1-acid glycoprotein 2 OS=Homo sapiens GN=ORM2 PE=1 SV=2	3	0.0113826		P19652	24 kDa	3
188	Alpha-1B-glycoprotein OS=Homo sapiens GN=A1BG PE=1 SV=4	3	0.0113826		P04217	54 kDa	2
189	Angiopoietin-related protein 3 OS=Homo sapiens GN=ANGPTL3 PE=1 SV=1	3	0.0113826		Q9Y5C1	54 kDa	2
190	C-reactive protein OS=Homo sapiens GN=CRP PE=1 SV=1	3	0.0113826		P02741	25 kDa	3
191	Cadherin-1 OS=Homo sapiens GN=CDH1 PE=1 SV=1	3	0.0113826		H3BNC6	59 kDa	3
192	Coagulation factor VIII OS=Homo sapiens GN=F8 PE=1 SV=1	3	0.0113826		P00451	267 kDa	3
193	Dendritic cell-specific transmembrane protein OS=Homo sapiens GN=DCSTAMP PE=1 SV=1	3	0.0113826		Q9H295	53 kDa	2
194	Ficolin-1 OS=Homo sapiens GN=FCN1 PE=1 SV=2	3	0.0113826		O00602	35 kDa	3
195	Fructose-bisphosphate aldolase OS=Homo sapiens GN=ALDOA PE=1 SV=1	3	0.0113826		J3KPS3 (+2)	40 kDa	3
196	Insulin-like growth factor-binding protein 4 OS=Homo sapiens GN=IGFBP4 PE=1 SV=2	3	0.0113826		P22692	28 kDa	3
197	Isoform 2 of Vitamin K-dependent protein Z OS=Homo sapiens GN=PROZ	3	0.0113826		P22891-2	47 kDa	3
198	Keratinocyte proline-rich protein OS=Homo sapiens GN=KPRP PE=1 SV=1	3	0.0113826		Q5T749	64 kDa	2
199	Protein S100-A7 OS=Homo sapiens GN=S100A7 PE=1 SV=4	3	0.0113826		P31151	11 kDa	3
200	Protein-glutamine gamma-glutamyltransferase E OS=Homo sapiens GN=TGM3 PE=1 SV=4	3	0.0113826		Q08188	77 kDa	3
201	Calsyntenin-1 OS=Homo sapiens GN=CLSTN1 PE=1 SV=1	2	0.0075884		O94985 (+1)	110 kDa	2
202	Cathepsin S OS=Homo sapiens GN=CTSS PE=1 SV=3	2	0.0075884		P25774	37 kDa	2
203	Cystatin-A OS=Homo sapiens GN=CSTA PE=1 SV=1	2	0.0075884		P01040	11 kDa	2
204	Filaggrin OS=Homo sapiens GN=FLG PE=1 SV=3	2	0.0075884		P20930	435 kDa	2
205	Isoform 6 of Prelamin-A/C OS=Homo sapiens GN=LMNA	2	0.0075884		P02545-6	69 kDa	2
206	Platelet basic protein OS=Homo sapiens GN=PPBP PE=1 SV=3	2	0.0075884		P02775	14 kDa	2
207	Platelet factor 4 OS=Homo sapiens GN=PF4 PE=1 SV=2	2	0.0075884		P02776	11 kDa	2
208	Protein IGLV3-25 (Fragment) OS=Homo sapiens GN=IGLV3-25 PE=1 SV=2	2	0.0075884		A0A075B6J4	12 kDa	2
209	Ribonuclease 4 OS=Homo sapiens GN=RNASE4 PE=1 SV=3	2	0.0075884		P34096	17 kDa	2
		26356	100

## Sheet: B1400 Repetition 3
Number	Identified Proteins	Spectrum Count B1400 N°3	Relative abundance (%)	Sum	Accession Number	Molecular Weight	Peptide count
1	Apolipoprotein B-100 OS=Homo sapiens GN=APOB PE=1 SV=2	2562	9.85044		P04114	516 kDa	247
2	Complement C3 OS=Homo sapiens GN=C3 PE=1 SV=2	2047	7.87035	26009	P01024	187 kDa	127
3	Complement C4-A OS=Homo sapiens GN=C4A PE=1 SV=2	1358	5.22127		P0C0L4	193 kDa	98
4	Serum albumin OS=Homo sapiens GN=ALB PE=1 SV=2	1271	4.88677		P02768	69 kDa	73
5	Apolipoprotein A-I OS=Homo sapiens GN=APOA1 PE=1 SV=1	964	3.70641		P02647	31 kDa	34
6	Prothrombin OS=Homo sapiens GN=F2 PE=1 SV=2	888	3.4142		P00734	70 kDa	44
7	Plasminogen OS=Homo sapiens GN=PLG PE=1 SV=2	856	3.29117		P00747	91 kDa	69
8	Antithrombin-III OS=Homo sapiens GN=SERPINC1 PE=1 SV=1	790	3.03741		P01008	53 kDa	36
9	Apolipoprotein E OS=Homo sapiens GN=APOE PE=1 SV=1	771	2.96436		P02649	36 kDa	34
10	Vitronectin OS=Homo sapiens GN=VTN PE=1 SV=1	742	2.85286		P04004	54 kDa	36
11	Complement factor H OS=Homo sapiens GN=CFH PE=1 SV=4	718	2.76058		P08603	139 kDa	70
12	Histidine-rich glycoprotein OS=Homo sapiens GN=HRG PE=1 SV=1	594	2.28382		P04196	60 kDa	47
13	Kininogen-1 OS=Homo sapiens GN=KNG1 PE=1 SV=2	592	2.27614		P01042	72 kDa	42
14	C4b-binding protein alpha chain OS=Homo sapiens GN=C4BPA PE=1 SV=2	589	2.2646		P04003	67 kDa	38
15	Isoform LMW of Kininogen-1 OS=Homo sapiens GN=KNG1	581	2.23384		P01042-2	48 kDa	2
16	Plasma protease C1 inhibitor OS=Homo sapiens GN=SERPING1 PE=1 SV=2	550	2.11465		P05155	55 kDa	22
17	Alpha-2-macroglobulin OS=Homo sapiens GN=A2M PE=1 SV=3	482	1.8532		P01023	163 kDa	60
18	Plasma kallikrein OS=Homo sapiens GN=KLKB1 PE=1 SV=1	471	1.81091		P03952	71 kDa	39
19	Coagulation factor XII OS=Homo sapiens GN=F12 PE=1 SV=3	448	1.72248		P00748	68 kDa	39
20	Ig gamma-3 chain C region OS=Homo sapiens GN=IGHG3 PE=1 SV=1	381	1.46488		A0A087WXL8	57 kDa	25
21	Ig gamma-1 chain C region OS=Homo sapiens GN=IGHG1 PE=1 SV=1	325	1.24957		A0A087WV47	51 kDa	3
22	Ig gamma-1 chain C region OS=Homo sapiens GN=IGHG1 PE=1 SV=1	314	1.20727		A0A087WYE1	52 kDa	11
23	Ig mu chain C region OS=Homo sapiens GN=IGHM PE=1 SV=1	309	1.18805		A0A087X2C0	64 kDa	23
24	Complement C1q subcomponent subunit C OS=Homo sapiens GN=C1QC PE=1 SV=3	301	1.15729		P02747	26 kDa	8
25	Gelsolin OS=Homo sapiens GN=GSN PE=1 SV=1	284	1.09193		P06396	86 kDa	31
26	Complement C1q subcomponent subunit B OS=Homo sapiens GN=C1QB PE=1 SV=1	256	0.984275		D6R934 (+1)	26 kDa	11
27	Ig kappa chain C region OS=Homo sapiens GN=IGKC PE=1 SV=1	218	0.838171		A0A087X130	25 kDa	2
28	Protein IGKV3-11 OS=Homo sapiens GN=IGKV3-11 PE=4 SV=1	216	0.830482		A0A087WZW8	26 kDa	13
29	Complement C1r subcomponent OS=Homo sapiens GN=C1R PE=1 SV=1	200	0.768965		B4DPQ0	82 kDa	26
30	Carboxypeptidase B2 OS=Homo sapiens GN=CPB2 PE=1 SV=2	195	0.74974		Q96IY4	48 kDa	17
31	Coagulation factor V OS=Homo sapiens GN=F5 PE=1 SV=1	188	0.722827		A0A0A0MRJ7 (+1)	252 kDa	50
32	Complement factor H-related protein 1 OS=Homo sapiens GN=CFHR1 PE=1 SV=2	186	0.715137		Q03591	38 kDa	8
33	Uncharacterized protein OS=Homo sapiens PE=1 SV=1	180	0.692068		B4E1Z4	141 kDa	27
34	Inter-alpha-trypsin inhibitor heavy chain H2 OS=Homo sapiens GN=ITIH2 PE=1 SV=2	166	0.638241		P19823 (+1)	106 kDa	26
35	Complement C1s subcomponent OS=Homo sapiens GN=C1S PE=1 SV=1	165	0.634396		P09871	77 kDa	26
36	Serum amyloid A-4 protein OS=Homo sapiens GN=SAA4 PE=1 SV=2	159	0.611327		P35542	15 kDa	7
37	Coagulation factor XI OS=Homo sapiens GN=F11 PE=1 SV=1	157	0.603637		P03951	70 kDa	31
38	Ig alpha-1 chain C region OS=Homo sapiens GN=IGHA1 PE=1 SV=2	148	0.569034		P01876	38 kDa	13
39	Ig gamma-2 chain C region OS=Homo sapiens GN=IGHG2 PE=1 SV=2	146	0.561344		P01859	36 kDa	4
40	Inter-alpha-trypsin inhibitor heavy chain H1 OS=Homo sapiens GN=ITIH1 PE=1 SV=3	130	0.499827		P19827	101 kDa	23
41	Isoform 2 of Apolipoprotein L1 OS=Homo sapiens GN=APOL1	126	0.484448		O14791-2	46 kDa	21
42	Complement C5 OS=Homo sapiens GN=C5 PE=1 SV=4	122	0.469068		P01031	188 kDa	44
43	Alpha-1-antitrypsin OS=Homo sapiens GN=SERPINA1 PE=1 SV=3	114	0.43831		P01009	47 kDa	25
44	Coagulation factor X OS=Homo sapiens GN=F10 PE=1 SV=2	112	0.43062		P00742	55 kDa	16
45	Complement component C8 beta chain OS=Homo sapiens GN=C8B PE=1 SV=3	110	0.422931		P07358	67 kDa	20
46	Apolipoprotein C-I (Fragment) OS=Homo sapiens GN=APOC1 PE=1 SV=1	109	0.419086		K7ERI9 (+1)	9 kDa	8
47	Plasma serine protease inhibitor OS=Homo sapiens GN=SERPINA5 PE=1 SV=3	103	0.396017		P05154	46 kDa	14
48	Complement factor H-related protein 5 OS=Homo sapiens GN=CFHR5 PE=1 SV=1	95	0.365258		Q9BXR6	64 kDa	24
49	Beta-2-glycoprotein 1 OS=Homo sapiens GN=APOH PE=1 SV=3	94	0.361413		P02749	38 kDa	16
50	Ig alpha-2 chain C region OS=Homo sapiens GN=IGHA2 PE=1 SV=3	93	0.357569		P01877	37 kDa	3
51	Selenoprotein P OS=Homo sapiens GN=SEPP1 PE=1 SV=3	93	0.357569		P49908	43 kDa	9
52	Heparin cofactor 2 OS=Homo sapiens GN=SERPIND1 PE=1 SV=3	89	0.342189		P05546	57 kDa	14
53	Immunoglobulin lambda-like polypeptide 5 OS=Homo sapiens GN=IGLL5 PE=1 SV=1	84	0.322965		A0A087WYR4	25 kDa	9
54	Complement component C9 OS=Homo sapiens GN=C9 PE=1 SV=2	78	0.299896		P02748	63 kDa	18
55	Isoform 2 of Clusterin OS=Homo sapiens GN=CLU	78	0.299896		P10909-2	58 kDa	13
56	Serum amyloid P-component OS=Homo sapiens GN=APCS PE=1 SV=2	75	0.288362		P02743	25 kDa	7
57	Apolipoprotein A-IV OS=Homo sapiens GN=APOA4 PE=1 SV=3	74	0.284517		P06727	45 kDa	19
58	Complement component C8 alpha chain OS=Homo sapiens GN=C8A PE=1 SV=2	73	0.280672		P07357	65 kDa	18
59	Sulfhydryl oxidase 1 OS=Homo sapiens GN=QSOX1 PE=1 SV=3	73	0.280672		O00391	83 kDa	25
60	Alpha-2-antiplasmin OS=Homo sapiens GN=SERPINF2 PE=1 SV=3	69	0.265293		P08697	55 kDa	12
61	Complement factor H-related protein 2 OS=Homo sapiens GN=CFHR2 PE=1 SV=1	65	0.249913		P36980	31 kDa	4
62	Coagulation factor IX OS=Homo sapiens GN=F9 PE=1 SV=2	63	0.242224		P00740	52 kDa	13
63	Haptoglobin OS=Homo sapiens GN=HP PE=1 SV=1	63	0.242224		P00738 (+2)	45 kDa	8
64	Haptoglobin-related protein OS=Homo sapiens GN=HPR PE=2 SV=2	60	0.230689		P00739 (+1)	39 kDa	15
65	Complement component C8 gamma chain OS=Homo sapiens GN=C8G PE=1 SV=3	59	0.226845		P07360	22 kDa	9
66	Tetranectin OS=Homo sapiens GN=CLEC3B PE=1 SV=3	57	0.219155		P05452	23 kDa	11
67	Isoform F of Proteoglycan 4 OS=Homo sapiens GN=PRG4	56	0.21531		Q92954-6	146 kDa	16
68	Vitamin K-dependent protein S OS=Homo sapiens GN=PROS1 PE=1 SV=1	52	0.199931		P07225	75 kDa	15
69	Apolipoprotein(a) OS=Homo sapiens GN=LPA PE=1 SV=1	51	0.196086		P08519	501 kDa	19
70	Complement C1q subcomponent subunit A OS=Homo sapiens GN=C1QA PE=1 SV=2	51	0.196086		P02745	26 kDa	8
71	Serotransferrin OS=Homo sapiens GN=TF PE=1 SV=3	51	0.196086		P02787	77 kDa	26
72	Transthyretin OS=Homo sapiens GN=TTR PE=1 SV=1	49	0.188396		P02766	16 kDa	10
73	Hepatocyte growth factor activator OS=Homo sapiens GN=HGFAC PE=1 SV=1	48	0.184552		D6RAR4 (+1)	71 kDa	11
74	Inter-alpha-trypsin inhibitor heavy chain H4 OS=Homo sapiens GN=ITIH4 PE=1 SV=4	47	0.180707		Q14624	103 kDa	16
75	Insulin-like growth factor-binding protein complex acid labile subunit OS=Homo sapiens GN=IGFALS PE=1 SV=1	45	0.173017		P35858 (+1)	66 kDa	16
76	Apolipoprotein D (Fragment) OS=Homo sapiens GN=APOD PE=1 SV=1	44	0.169172		C9JF17 (+1)	24 kDa	6
77	Carboxypeptidase N catalytic chain OS=Homo sapiens GN=CPN1 PE=1 SV=1	43	0.165327		P15169	52 kDa	12
78	Apolipoprotein A-II OS=Homo sapiens GN=APOA2 PE=1 SV=1	37	0.142258		P02652 (+1)	11 kDa	5
79	Hyaluronan-binding protein 2 OS=Homo sapiens GN=HABP2 PE=1 SV=1	36	0.138414		Q14520	63 kDa	15
80	Properdin OS=Homo sapiens GN=CFP PE=1 SV=2	36	0.138414		P27918	51 kDa	14
81	Insulin-like growth factor-binding protein 3 OS=Homo sapiens GN=IGFBP3 PE=1 SV=2	35	0.134569		P17936 (+1)	32 kDa	15
82	Ig kappa chain V-III region HAH OS=Homo sapiens PE=2 SV=1	33	0.126879		P18135	14 kDa	6
83	CD5 antigen-like OS=Homo sapiens GN=CD5L PE=1 SV=1	32	0.123034		O43866	38 kDa	11
84	Serum paraoxonase/arylesterase 1 OS=Homo sapiens GN=PON1 PE=1 SV=3	32	0.123034		P27169	40 kDa	9
85	Vitamin K-dependent protein C OS=Homo sapiens GN=PROC PE=1 SV=1	32	0.123034		P04070	52 kDa	9
86	Fibronectin OS=Homo sapiens GN=FN1 PE=1 SV=4	31	0.11919		P02751 (+6)	263 kDa	17
87	Isoform 2 of C4b-binding protein beta chain OS=Homo sapiens GN=C4BPB	31	0.11919		P20851-2	28 kDa	6
88	Ceruloplasmin OS=Homo sapiens GN=CP PE=1 SV=1	29	0.1115		P00450	122 kDa	15
89	Ig delta chain C region OS=Homo sapiens GN=IGHD PE=1 SV=1	29	0.1115		A0A087WUS7	42 kDa	7
90	Protein IGHV3-74 (Fragment) OS=Homo sapiens GN=IGHV3-74 PE=1 SV=1	29	0.1115		A0A0B4J1X5	13 kDa	3
91	Hornerin OS=Homo sapiens GN=HRNR PE=1 SV=2	28	0.107655		Q86YZ3	282 kDa	10
92	Dermcidin OS=Homo sapiens GN=DCD PE=1 SV=2	27	0.10381		P81605	11 kDa	6
93	Lipopolysaccharide-binding protein OS=Homo sapiens GN=LBP PE=1 SV=3	26	0.0999654		P18428	53 kDa	8
94	Protein AMBP OS=Homo sapiens GN=AMBP PE=1 SV=1	26	0.0999654		P02760	39 kDa	9
95	Isoform 2 of Complement factor H-related protein 3 OS=Homo sapiens GN=CFHR3	24	0.0922758		Q02985-2	31 kDa	4
96	Mannan-binding lectin serine protease 1 OS=Homo sapiens GN=MASP1 PE=1 SV=3	24	0.0922758		P48740	79 kDa	6
97	Complement component C6 OS=Homo sapiens GN=C6 PE=1 SV=3	23	0.0884309		P13671	105 kDa	13
98	Protein Z-dependent protease inhibitor OS=Homo sapiens GN=SERPINA10 PE=1 SV=1	23	0.0884309		G3V2W1	55 kDa	10
99	Lactotransferrin (Fragment) OS=Homo sapiens GN=LTF PE=1 SV=1	22	0.0845861		E7EQB2 (+2)	77 kDa	17
100	78 kDa glucose-regulated protein OS=Homo sapiens GN=HSPA5 PE=1 SV=2	21	0.0807413		P11021	72 kDa	9
101	Fibrinogen beta chain OS=Homo sapiens GN=FGB PE=1 SV=2	20	0.0768965		P02675	56 kDa	13
102	Procollagen C-endopeptidase enhancer 1 OS=Homo sapiens GN=PCOLCE PE=1 SV=2	18	0.0692068		Q15113	48 kDa	11
103	Transforming growth factor-beta-induced protein ig-h3 OS=Homo sapiens GN=TGFBI PE=1 SV=1	18	0.0692068		Q15582	75 kDa	14
104	Alpha-2-HS-glycoprotein OS=Homo sapiens GN=AHSG PE=1 SV=1	17	0.065362		P02765	39 kDa	8
105	Hemoglobin subunit beta OS=Homo sapiens GN=HBB PE=1 SV=2	17	0.065362		P68871	16 kDa	10
106	Secreted phosphoprotein 24 OS=Homo sapiens GN=SPP2 PE=1 SV=1	17	0.065362		Q13103	24 kDa	7
107	Complement component C7 OS=Homo sapiens GN=C7 PE=1 SV=2	16	0.0615172		P10643	94 kDa	11
108	Ficolin-3 OS=Homo sapiens GN=FCN3 PE=1 SV=2	16	0.0615172		O75636	33 kDa	8
109	Desmoplakin OS=Homo sapiens GN=DSP PE=1 SV=3	15	0.0576723		P15924	332 kDa	9
110	Insulin-like growth factor-binding protein 2 OS=Homo sapiens GN=IGFBP2 PE=1 SV=2	15	0.0576723		P18065	35 kDa	7
111	N-acetylmuramoyl-L-alanine amidase OS=Homo sapiens GN=PGLYRP2 PE=1 SV=1	15	0.0576723		Q96PD5	62 kDa	8
112	Protein IGHV5-51 (Fragment) OS=Homo sapiens GN=IGHV5-51 PE=1 SV=1	15	0.0576723		A0A0C4DH38	13 kDa	4
113	Cartilage acidic protein 1 OS=Homo sapiens GN=CRTAC1 PE=1 SV=1	14	0.0538275		A0A0C4DFP6 (+1)	70 kDa	12
114	Ig lambda chain V-I region WAH OS=Homo sapiens PE=1 SV=1	14	0.0538275		P04208	12 kDa	3
115	Keratinocyte proline-rich protein OS=Homo sapiens GN=KPRP PE=1 SV=1	14	0.0538275		Q5T749	64 kDa	7
116	Coagulation factor VII OS=Homo sapiens GN=F7 PE=1 SV=2	12	0.0461379		F5H8B0 (+2)	42 kDa	5
117	Fibrinogen gamma chain OS=Homo sapiens GN=FGG PE=1 SV=3	12	0.0461379		P02679 (+3)	52 kDa	6
118	Glutathione peroxidase OS=Homo sapiens GN=GPX3 PE=1 SV=1	12	0.0461379		A0A087X1J7 (+1)	25 kDa	5
119	Kallistatin OS=Homo sapiens GN=SERPINA4 PE=1 SV=3	12	0.0461379		P29622	49 kDa	12
120	Cathelicidin antimicrobial peptide OS=Homo sapiens GN=CAMP PE=1 SV=1	11	0.0422931		J3KNB4 (+1)	20 kDa	8
121	Complement factor I OS=Homo sapiens GN=CFI PE=1 SV=1	11	0.0422931		E7ETH0 (+2)	67 kDa	8
122	Isoform 2 of Apolipoprotein M OS=Homo sapiens GN=APOM	11	0.0422931		O95445-2	13 kDa	6
123	Protein S100-A8 OS=Homo sapiens GN=S100A8 PE=1 SV=1	11	0.0422931		P05109	11 kDa	2
124	Thrombospondin-1 OS=Homo sapiens GN=THBS1 PE=1 SV=2	11	0.0422931		P07996	129 kDa	9
125	Fibulin-1 OS=Homo sapiens GN=FBLN1 PE=1 SV=1	10	0.0384482		B1AHL2 (+1)	78 kDa	9
126	Hepatocyte growth factor-like protein OS=Homo sapiens GN=MST1 PE=1 SV=1	10	0.0384482		G3XAK1 (+1)	82 kDa	7
127	Histone-lysine N-methyltransferase 2A OS=Homo sapiens GN=KMT2A PE=1 SV=5	10	0.0384482		Q03164 (+2)	432 kDa	3
128	Ig kappa chain V-IV region JI OS=Homo sapiens PE=4 SV=1	10	0.0384482		P06313	15 kDa	3
129	Multiple inositol polyphosphate phosphatase 1 OS=Homo sapiens GN=MINPP1 PE=1 SV=1	10	0.0384482		Q9UNW1	55 kDa	7
130	Desmoglein-1 OS=Homo sapiens GN=DSG1 PE=1 SV=2	9	0.0346034		Q02413	114 kDa	7
131	Isoform 3 of Collagen alpha-1(XVIII) chain OS=Homo sapiens GN=COL18A1	9	0.0346034		P39060-2	136 kDa	6
132	Hemoglobin subunit alpha OS=Homo sapiens GN=HBA1 PE=1 SV=2	8	0.0307586		P69905	15 kDa	5
133	Pigment epithelium-derived factor OS=Homo sapiens GN=SERPINF1 PE=1 SV=4	8	0.0307586		P36955	46 kDa	6
134	Protein IGHV4-34 (Fragment) OS=Homo sapiens GN=IGHV4-34 PE=1 SV=1	8	0.0307586		A0A0A0MS12	14 kDa	3
135	Actin, cytoplasmic 1 OS=Homo sapiens GN=ACTB PE=1 SV=1	7	0.0269138		P60709 (+1)	42 kDa	5
136	Alpha-1-antichymotrypsin OS=Homo sapiens GN=SERPINA3 PE=1 SV=2	7	0.0269138		P01011	48 kDa	3
137	Complement factor D OS=Homo sapiens GN=CFD PE=1 SV=1	7	0.0269138		K7ERG9	28 kDa	5
138	Filaggrin-2 OS=Homo sapiens GN=FLG2 PE=1 SV=1	7	0.0269138		Q5D862	248 kDa	3
139	Ig kappa chain V-II region TEW OS=Homo sapiens PE=1 SV=1	7	0.0269138		P01617	12 kDa	2
140	Junction plakoglobin OS=Homo sapiens GN=JUP PE=1 SV=3	7	0.0269138		P14923	82 kDa	6
141	Protein JCHAIN (Fragment) OS=Homo sapiens GN=JCHAIN PE=1 SV=5	7	0.0269138		D6RD17 (+1)	18 kDa	3
142	Vitamin D-binding protein OS=Homo sapiens GN=GC PE=1 SV=1	7	0.0269138		D6RF35	53 kDa	5
143	Angiotensinogen OS=Homo sapiens GN=AGT PE=1 SV=1	6	0.0230689		P01019	53 kDa	4
144	Apolipoprotein C-IV OS=Homo sapiens GN=APOC4 PE=1 SV=1	6	0.0230689		P55056	15 kDa	3
145	Ig kappa chain V-III region B6 OS=Homo sapiens PE=1 SV=1	6	0.0230689		P01619	12 kDa	3
146	Isoform M1 of Pyruvate kinase PKM OS=Homo sapiens GN=PKM	6	0.0230689		P14618-2	58 kDa	3
147	Nicotinate phosphoribosyltransferase (Fragment) OS=Homo sapiens GN=NAPRT PE=1 SV=1	6	0.0230689		H0YDA6	14 kDa	2
148	Phosphatidylinositol-glycan-specific phospholipase D OS=Homo sapiens GN=GPLD1 PE=1 SV=3	6	0.0230689		P80108	92 kDa	3
149	Protein IGHV3-49 OS=Homo sapiens GN=IGHV3-49 PE=1 SV=1	6	0.0230689		A0A087WU91 (+1)	12 kDa	3
150	Protein IGLV3-21 (Fragment) OS=Homo sapiens GN=IGLV3-21 PE=1 SV=1	6	0.0230689		A0A075B6J7	12 kDa	2
151	Protein IGLV3-25 (Fragment) OS=Homo sapiens GN=IGLV3-25 PE=1 SV=2	6	0.0230689		A0A075B6J4	12 kDa	3
152	C-reactive protein OS=Homo sapiens GN=CRP PE=1 SV=1	5	0.0192241		P02741	25 kDa	3
153	Hemopexin OS=Homo sapiens GN=HPX PE=1 SV=2	5	0.0192241		P02790	52 kDa	4
154	Lysozyme C OS=Homo sapiens GN=LYZ PE=1 SV=1	5	0.0192241		P61626	17 kDa	4
155	Protein IGLV3-19 (Fragment) OS=Homo sapiens GN=IGLV3-19 PE=1 SV=1	5	0.0192241		A0A075B6J8	12 kDa	2
156	Ubiquitin carboxyl-terminal hydrolase 34 OS=Homo sapiens GN=USP34 PE=1 SV=2	5	0.0192241		Q70CQ2-DECOY	?	3
157	Angiopoietin-related protein 3 OS=Homo sapiens GN=ANGPTL3 PE=1 SV=1	4	0.0153793		Q9Y5C1	54 kDa	3
158	Carboxypeptidase N subunit 2 OS=Homo sapiens GN=CPN2 PE=1 SV=3	4	0.0153793		P22792	61 kDa	4
159	Cathepsin S OS=Homo sapiens GN=CTSS PE=1 SV=3	4	0.0153793		P25774	37 kDa	4
160	Dendritic cell-specific transmembrane protein OS=Homo sapiens GN=DCSTAMP PE=1 SV=1	4	0.0153793		Q9H295	53 kDa	4
161	Endoplasmin OS=Homo sapiens GN=HSP90B1 PE=1 SV=1	4	0.0153793		P14625	92 kDa	3
162	Fibrinogen alpha chain OS=Homo sapiens GN=FGA PE=1 SV=2	4	0.0153793		P02671 (+1)	95 kDa	4
163	Ficolin-1 OS=Homo sapiens GN=FCN1 PE=1 SV=2	4	0.0153793		O00602	35 kDa	4
164	Flavin reductase (NADPH) OS=Homo sapiens GN=BLVRB PE=1 SV=3	4	0.0153793		P30043	22 kDa	4
165	Glyceraldehyde-3-phosphate dehydrogenase OS=Homo sapiens GN=GAPDH PE=1 SV=3	4	0.0153793		P04406	36 kDa	2
166	L-lactate dehydrogenase A chain OS=Homo sapiens GN=LDHA PE=1 SV=2	4	0.0153793		P00338 (+1)	37 kDa	2
167	Prenylcysteine oxidase 1 OS=Homo sapiens GN=PCYOX1 PE=1 SV=3	4	0.0153793		Q9UHG3	57 kDa	3
168	Ribonuclease 4 OS=Homo sapiens GN=RNASE4 PE=1 SV=3	4	0.0153793		P34096	17 kDa	4
169	Adipocyte plasma membrane-associated protein (Fragment) OS=Homo sapiens GN=APMAP PE=1 SV=1	3	0.0115345		H0Y512	45 kDa	3
170	Alpha-1-acid glycoprotein 2 OS=Homo sapiens GN=ORM2 PE=1 SV=2	3	0.0115345		P19652	24 kDa	2
171	Alpha-1B-glycoprotein OS=Homo sapiens GN=A1BG PE=1 SV=4	3	0.0115345		P04217	54 kDa	3
172	Cadherin-1 OS=Homo sapiens GN=CDH1 PE=1 SV=1	3	0.0115345		H3BNC6	59 kDa	2
173	Calsyntenin-1 OS=Homo sapiens GN=CLSTN1 PE=1 SV=1	3	0.0115345		O94985 (+1)	110 kDa	3
174	Creatine kinase M-type OS=Homo sapiens GN=CKM PE=1 SV=2	3	0.0115345		P06732	43 kDa	3
175	Cystatin-A OS=Homo sapiens GN=CSTA PE=1 SV=1	3	0.0115345		P01040	11 kDa	2
176	Insulin-like growth factor-binding protein 4 OS=Homo sapiens GN=IGFBP4 PE=1 SV=2	3	0.0115345		P22692	28 kDa	3
177	Nebulin OS=Homo sapiens GN=NEB PE=1 SV=1	3	0.0115345		A0A087X1N7 (+2)	991 kDa	3
178	Retinoic acid receptor responder protein 2 OS=Homo sapiens GN=RARRES2 PE=1 SV=1	3	0.0115345		Q99969	19 kDa	2
179	Apolipoprotein A-V OS=Homo sapiens GN=APOA5 PE=1 SV=1	2	0.00768965		Q6Q788	41 kDa	2
180	Caspase-14 OS=Homo sapiens GN=CASP14 PE=1 SV=2	2	0.00768965		P31944	28 kDa	2
181	Chondroadherin OS=Homo sapiens GN=CHAD PE=2 SV=2	2	0.00768965		O15335	40 kDa	2
182	Coagulation factor VIII OS=Homo sapiens GN=F8 PE=1 SV=1	2	0.00768965		P00451	267 kDa	2
183	Cornifin-A OS=Homo sapiens GN=SPRR1A PE=1 SV=2	2	0.00768965		P35321	10 kDa	2
184	Creatine kinase U-type, mitochondrial OS=Homo sapiens GN=CKMT1A PE=1 SV=1	2	0.00768965		P12532 (+1)	47 kDa	2
185	Galectin-7 OS=Homo sapiens GN=LGALS7 PE=1 SV=2	2	0.00768965		P47929	15 kDa	2
186	IgGFc-binding protein OS=Homo sapiens GN=FCGBP PE=1 SV=1	2	0.00768965		A0A087WXI2 (+1)	445 kDa	2
187	Insulin-like growth factor-binding protein 7 OS=Homo sapiens GN=IGFBP7 PE=1 SV=1	2	0.00768965		Q16270 (+1)	29 kDa	2
188	Inter-alpha-trypsin inhibitor heavy chain H3 OS=Homo sapiens GN=ITIH3 PE=1 SV=2	2	0.00768965		Q06033	100 kDa	2
189	Phospholipase A1 member A OS=Homo sapiens GN=PLA1A PE=1 SV=1	2	0.00768965		G5E9W0 (+3)	48 kDa	2
190	Platelet factor 4 OS=Homo sapiens GN=PF4 PE=1 SV=2	2	0.00768965		P02776	11 kDa	2
191	Protein S100-A9 OS=Homo sapiens GN=S100A9 PE=1 SV=1	2	0.00768965		P06702	13 kDa	2
192	Small proline-rich protein 2D OS=Homo sapiens GN=SPRR2D PE=2 SV=2	2	0.00768965		P22532	8 kDa	2
		26009	100

## Sheet: B20 Repetition 1
Number	Identified Proteins	Spectrum Count B20 N°1	Relative abundance (%)	Sum	Accession Number	Molecular Weight	Peptide count
1	Apolipoprotein B-100 OS=Homo sapiens GN=APOB PE=1 SV=2	2613	9.00569		P04114	516 kDa	252
2	Complement C3 OS=Homo sapiens GN=C3 PE=1 SV=2	2518	8.67827	29015	P01024	187 kDa	137
3	Complement C4-A OS=Homo sapiens GN=C4A PE=1 SV=2	1422	4.90091		P0C0L4	193 kDa	105
4	Apolipoprotein A-I OS=Homo sapiens GN=APOA1 PE=1 SV=1	1218	4.19783		P02647	31 kDa	38
5	Serum albumin OS=Homo sapiens GN=ALB PE=1 SV=2	1155	3.9807		P02768	69 kDa	66
6	Prothrombin OS=Homo sapiens GN=F2 PE=1 SV=2	1022	3.52232		P00734	70 kDa	46
7	Apolipoprotein E OS=Homo sapiens GN=APOE PE=1 SV=1	923	3.18111		P02649	36 kDa	38
8	Antithrombin-III OS=Homo sapiens GN=SERPINC1 PE=1 SV=1	917	3.16043		P01008	53 kDa	39
9	Plasminogen OS=Homo sapiens GN=PLG PE=1 SV=2	848	2.92263		P00747	91 kDa	80
10	Vitronectin OS=Homo sapiens GN=VTN PE=1 SV=1	800	2.75719		P04004	54 kDa	38
11	Complement factor H OS=Homo sapiens GN=CFH PE=1 SV=4	783	2.6986		P08603	139 kDa	78
12	Kininogen-1 OS=Homo sapiens GN=KNG1 PE=1 SV=2	706	2.43322		P01042	72 kDa	44
13	Isoform LMW of Kininogen-1 OS=Homo sapiens GN=KNG1	696	2.39876		P01042-2	48 kDa	2
14	Histidine-rich glycoprotein OS=Homo sapiens GN=HRG PE=1 SV=1	671	2.3126		P04196	60 kDa	48
15	C4b-binding protein alpha chain OS=Homo sapiens GN=C4BPA PE=1 SV=2	610	2.10236		P04003	67 kDa	44
16	Coagulation factor XII OS=Homo sapiens GN=F12 PE=1 SV=3	585	2.0162		P00748	68 kDa	52
17	Plasma kallikrein OS=Homo sapiens GN=KLKB1 PE=1 SV=1	581	2.00241		P03952	71 kDa	43
18	Plasma protease C1 inhibitor OS=Homo sapiens GN=SERPING1 PE=1 SV=2	488	1.68189		P05155	55 kDa	28
19	Alpha-2-macroglobulin OS=Homo sapiens GN=A2M PE=1 SV=3	469	1.61641		P01023	163 kDa	60
20	Uncharacterized protein OS=Homo sapiens PE=1 SV=1	426	1.46821		B4E1Z4	141 kDa	43
21	Ig gamma-3 chain C region OS=Homo sapiens GN=IGHG3 PE=1 SV=1	415	1.43029		A0A087WXL8	57 kDa	30
22	Gelsolin OS=Homo sapiens GN=GSN PE=1 SV=1	342	1.1787		P06396	86 kDa	35
23	Ig gamma-1 chain C region OS=Homo sapiens GN=IGHG1 PE=1 SV=1	328	1.13045		A0A087WV47	51 kDa	3
24	Ig gamma-1 chain C region OS=Homo sapiens GN=IGHG1 PE=1 SV=1	321	1.10632		A0A087WYE1	52 kDa	11
25	Complement C1q subcomponent subunit C OS=Homo sapiens GN=C1QC PE=1 SV=3	301	1.03739		P02747	26 kDa	9
26	Complement C1q subcomponent subunit B OS=Homo sapiens GN=C1QB PE=1 SV=1	287	0.989144		D6R934 (+1)	26 kDa	12
27	Ig mu chain C region OS=Homo sapiens GN=IGHM PE=1 SV=1	286	0.985697		A0A087X2C0	64 kDa	22
28	Carboxypeptidase B2 OS=Homo sapiens GN=CPB2 PE=1 SV=2	240	0.827158		Q96IY4	48 kDa	17
29	Coagulation factor V OS=Homo sapiens GN=F5 PE=1 SV=1	222	0.765121		A0A0A0MRJ7 (+1)	252 kDa	52
30	Complement factor H-related protein 1 OS=Homo sapiens GN=CFHR1 PE=1 SV=2	219	0.754782		Q03591	38 kDa	7
31	Complement C1r subcomponent OS=Homo sapiens GN=C1R PE=1 SV=1	217	0.747889		B4DPQ0	82 kDa	29
32	Protein IGKV3-11 OS=Homo sapiens GN=IGKV3-11 PE=4 SV=1	208	0.716871		A0A087WZW8	26 kDa	15
33	Ig kappa chain C region OS=Homo sapiens GN=IGKC PE=1 SV=1	203	0.699638		A0A087X130	25 kDa	2
34	Inter-alpha-trypsin inhibitor heavy chain H2 OS=Homo sapiens GN=ITIH2 PE=1 SV=2	198	0.682406		P19823 (+1)	106 kDa	28
35	Coagulation factor XI OS=Homo sapiens GN=F11 PE=1 SV=1	179	0.616922		P03951	70 kDa	29
36	Complement C1s subcomponent OS=Homo sapiens GN=C1S PE=1 SV=1	177	0.610029		P09871	77 kDa	27
37	Isoform 2 of Apolipoprotein L1 OS=Homo sapiens GN=APOL1	174	0.59969		O14791-2	46 kDa	20
38	Serum amyloid A-4 protein OS=Homo sapiens GN=SAA4 PE=1 SV=2	172	0.592797		P35542	15 kDa	8
39	Inter-alpha-trypsin inhibitor heavy chain H1 OS=Homo sapiens GN=ITIH1 PE=1 SV=3	170	0.585904		P19827	101 kDa	27
40	Ig gamma-2 chain C region OS=Homo sapiens GN=IGHG2 PE=1 SV=2	167	0.575564		P01859	36 kDa	3
41	Complement C5 OS=Homo sapiens GN=C5 PE=1 SV=4	157	0.541099		P01031	188 kDa	54
42	Alpha-1-antitrypsin OS=Homo sapiens GN=SERPINA1 PE=1 SV=3	139	0.479063		P01009	47 kDa	24
43	Plasma serine protease inhibitor OS=Homo sapiens GN=SERPINA5 PE=1 SV=3	139	0.479063		P05154	46 kDa	17
44	Beta-2-glycoprotein 1 OS=Homo sapiens GN=APOH PE=1 SV=3	138	0.475616		P02749	38 kDa	18
45	Coagulation factor X OS=Homo sapiens GN=F10 PE=1 SV=2	135	0.465277		P00742	55 kDa	17
46	Apolipoprotein C-I (Fragment) OS=Homo sapiens GN=APOC1 PE=1 SV=1	133	0.458384		K7ERI9 (+1)	9 kDa	8
47	Ig alpha-1 chain C region OS=Homo sapiens GN=IGHA1 PE=1 SV=2	131	0.451491		P01876	38 kDa	13
48	Complement component C8 beta chain OS=Homo sapiens GN=C8B PE=1 SV=3	130	0.448044		P07358	67 kDa	23
49	Selenoprotein P OS=Homo sapiens GN=SEPP1 PE=1 SV=3	114	0.3929		P49908	43 kDa	10
50	Complement factor H-related protein 5 OS=Homo sapiens GN=CFHR5 PE=1 SV=1	110	0.379114		Q9BXR6	64 kDa	21
51	Immunoglobulin lambda-like polypeptide 5 OS=Homo sapiens GN=IGLL5 PE=1 SV=1	98	0.337756		A0A087WYR4	25 kDa	10
52	Complement component C9 OS=Homo sapiens GN=C9 PE=1 SV=2	97	0.33431		P02748	63 kDa	22
53	Heparin cofactor 2 OS=Homo sapiens GN=SERPIND1 PE=1 SV=3	95	0.327417		P05546	57 kDa	15
54	Isoform 2 of Clusterin OS=Homo sapiens GN=CLU	95	0.327417		P10909-2	58 kDa	19
55	Sulfhydryl oxidase 1 OS=Homo sapiens GN=QSOX1 PE=1 SV=3	90	0.310184		O00391	83 kDa	26
56	Alpha-2-antiplasmin OS=Homo sapiens GN=SERPINF2 PE=1 SV=3	84	0.289505		P08697	55 kDa	15
57	Ig alpha-2 chain C region OS=Homo sapiens GN=IGHA2 PE=1 SV=3	82	0.282612		P01877	37 kDa	3
58	Apolipoprotein A-IV OS=Homo sapiens GN=APOA4 PE=1 SV=3	79	0.272273		P06727	45 kDa	21
59	Insulin-like growth factor-binding protein complex acid labile subunit OS=Homo sapiens GN=IGFALS PE=1 SV=1	79	0.272273		P35858 (+1)	66 kDa	18
60	Isoform F of Proteoglycan 4 OS=Homo sapiens GN=PRG4	76	0.261933		Q92954-6	146 kDa	15
61	Hepatocyte growth factor activator OS=Homo sapiens GN=HGFAC PE=1 SV=1	73	0.251594		D6RAR4 (+1)	71 kDa	13
62	Coagulation factor IX OS=Homo sapiens GN=F9 PE=1 SV=2	70	0.241255		P00740	52 kDa	14
63	Inter-alpha-trypsin inhibitor heavy chain H4 OS=Homo sapiens GN=ITIH4 PE=1 SV=4	70	0.241255		Q14624	103 kDa	21
64	Complement C1q subcomponent subunit A OS=Homo sapiens GN=C1QA PE=1 SV=2	69	0.237808		P02745	26 kDa	9
65	Complement component C8 alpha chain OS=Homo sapiens GN=C8A PE=1 SV=2	69	0.237808		P07357	65 kDa	17
66	Complement factor H-related protein 2 OS=Homo sapiens GN=CFHR2 PE=1 SV=1	67	0.230915		P36980	31 kDa	4
67	Vitamin K-dependent protein S OS=Homo sapiens GN=PROS1 PE=1 SV=1	67	0.230915		P07225	75 kDa	16
68	Carboxypeptidase N catalytic chain OS=Homo sapiens GN=CPN1 PE=1 SV=1	64	0.220576		P15169	52 kDa	14
69	Serum amyloid P-component OS=Homo sapiens GN=APCS PE=1 SV=2	64	0.220576		P02743	25 kDa	7
70	Haptoglobin-related protein OS=Homo sapiens GN=HPR PE=2 SV=2	63	0.217129		P00739 (+1)	39 kDa	19
71	Properdin OS=Homo sapiens GN=CFP PE=1 SV=2	63	0.217129		P27918	51 kDa	16
72	Haptoglobin OS=Homo sapiens GN=HP PE=1 SV=1	55	0.189557		P00738 (+2)	45 kDa	7
73	Apolipoprotein A-II OS=Homo sapiens GN=APOA2 PE=1 SV=1	52	0.179218		P02652 (+1)	11 kDa	5
74	Serotransferrin OS=Homo sapiens GN=TF PE=1 SV=3	52	0.179218		P02787	77 kDa	21
75	Tetranectin OS=Homo sapiens GN=CLEC3B PE=1 SV=3	52	0.179218		P05452	23 kDa	9
76	Complement component C8 gamma chain OS=Homo sapiens GN=C8G PE=1 SV=3	51	0.175771		P07360	22 kDa	9
77	Apolipoprotein(a) OS=Homo sapiens GN=LPA PE=1 SV=1	48	0.165432		P08519	501 kDa	16
78	Transthyretin OS=Homo sapiens GN=TTR PE=1 SV=1	47	0.161985		P02766	16 kDa	9
79	Insulin-like growth factor-binding protein 3 OS=Homo sapiens GN=IGFBP3 PE=1 SV=2	45	0.155092		P17936 (+1)	32 kDa	13
80	Apolipoprotein D (Fragment) OS=Homo sapiens GN=APOD PE=1 SV=1	43	0.148199		C9JF17 (+1)	24 kDa	6
81	78 kDa glucose-regulated protein OS=Homo sapiens GN=HSPA5 PE=1 SV=2	42	0.144753		P11021	72 kDa	14
82	Vitamin K-dependent protein C OS=Homo sapiens GN=PROC PE=1 SV=1	41	0.141306		P04070	52 kDa	11
83	Ceruloplasmin OS=Homo sapiens GN=CP PE=1 SV=1	40	0.13786		P00450	122 kDa	16
84	Ig kappa chain V-III region HAH OS=Homo sapiens PE=2 SV=1	37	0.12752		P18135	14 kDa	6
85	Isoform 2 of Complement factor H-related protein 3 OS=Homo sapiens GN=CFHR3	36	0.124074		Q02985-2	31 kDa	7
86	Protein AMBP OS=Homo sapiens GN=AMBP PE=1 SV=1	36	0.124074		P02760	39 kDa	10
87	Hyaluronan-binding protein 2 OS=Homo sapiens GN=HABP2 PE=1 SV=1	35	0.120627		Q14520	63 kDa	16
88	Ig delta chain C region OS=Homo sapiens GN=IGHD PE=1 SV=1	34	0.117181		A0A087WUS7	42 kDa	8
89	Isoform 2 of C4b-binding protein beta chain OS=Homo sapiens GN=C4BPB	34	0.117181		P20851-2	28 kDa	8
90	Serum paraoxonase/arylesterase 1 OS=Homo sapiens GN=PON1 PE=1 SV=3	34	0.117181		P27169	40 kDa	8
91	Mannan-binding lectin serine protease 1 OS=Homo sapiens GN=MASP1 PE=1 SV=3	31	0.106841		P48740	79 kDa	10
92	Fibronectin OS=Homo sapiens GN=FN1 PE=1 SV=4	30	0.103395		P02751 (+6)	263 kDa	19
93	Procollagen C-endopeptidase enhancer 1 OS=Homo sapiens GN=PCOLCE PE=1 SV=2	30	0.103395		Q15113	48 kDa	11
94	Protein IGHV3-74 (Fragment) OS=Homo sapiens GN=IGHV3-74 PE=1 SV=1	29	0.0999483		A0A0B4J1X5	13 kDa	2
95	CD5 antigen-like OS=Homo sapiens GN=CD5L PE=1 SV=1	27	0.0930553		O43866	38 kDa	13
96	Complement component C6 OS=Homo sapiens GN=C6 PE=1 SV=3	27	0.0930553		P13671	105 kDa	15
97	N-acetylmuramoyl-L-alanine amidase OS=Homo sapiens GN=PGLYRP2 PE=1 SV=1	27	0.0930553		Q96PD5	62 kDa	9
98	Dermcidin OS=Homo sapiens GN=DCD PE=1 SV=2	26	0.0896088		P81605	11 kDa	4
99	Protein Z-dependent protease inhibitor OS=Homo sapiens GN=SERPINA10 PE=1 SV=1	26	0.0896088		G3V2W1	55 kDa	10
100	Kallistatin OS=Homo sapiens GN=SERPINA4 PE=1 SV=3	24	0.0827158		P29622	49 kDa	12
101	Hemoglobin subunit beta OS=Homo sapiens GN=HBB PE=1 SV=2	23	0.0792693		P68871	16 kDa	10
102	Lactotransferrin (Fragment) OS=Homo sapiens GN=LTF PE=1 SV=1	23	0.0792693		E7EQB2 (+2)	77 kDa	13
103	Fibrinogen beta chain OS=Homo sapiens GN=FGB PE=1 SV=2	21	0.0723764		P02675	56 kDa	13
104	Fibrinogen gamma chain OS=Homo sapiens GN=FGG PE=1 SV=3	21	0.0723764		P02679 (+3)	52 kDa	9
105	Alpha-2-HS-glycoprotein OS=Homo sapiens GN=AHSG PE=1 SV=1	20	0.0689299		P02765	39 kDa	8
106	Ficolin-3 OS=Homo sapiens GN=FCN3 PE=1 SV=2	20	0.0689299		O75636	33 kDa	9
107	Hornerin OS=Homo sapiens GN=HRNR PE=1 SV=2	18	0.0620369		Q86YZ3	282 kDa	6
108	Lipopolysaccharide-binding protein OS=Homo sapiens GN=LBP PE=1 SV=3	17	0.0585904		P18428	53 kDa	8
109	Cartilage acidic protein 1 OS=Homo sapiens GN=CRTAC1 PE=1 SV=1	16	0.0551439		A0A0C4DFP6 (+1)	70 kDa	11
110	Transforming growth factor-beta-induced protein ig-h3 OS=Homo sapiens GN=TGFBI PE=1 SV=1	16	0.0551439		Q15582	75 kDa	15
111	Coagulation factor VII OS=Homo sapiens GN=F7 PE=1 SV=2	15	0.0516974		F5H8B0 (+2)	42 kDa	5
112	Complement factor I OS=Homo sapiens GN=CFI PE=1 SV=1	15	0.0516974		E7ETH0 (+2)	67 kDa	11
113	Insulin-like growth factor-binding protein 2 OS=Homo sapiens GN=IGFBP2 PE=1 SV=2	15	0.0516974		P18065	35 kDa	7
114	Protein IGHV5-51 (Fragment) OS=Homo sapiens GN=IGHV5-51 PE=1 SV=1	15	0.0516974		A0A0C4DH38	13 kDa	3
115	Multiple inositol polyphosphate phosphatase 1 OS=Homo sapiens GN=MINPP1 PE=1 SV=1	14	0.0482509		Q9UNW1	55 kDa	8
116	Complement factor D OS=Homo sapiens GN=CFD PE=1 SV=1	13	0.0448044		K7ERG9	28 kDa	8
117	Hepatocyte growth factor-like protein OS=Homo sapiens GN=MST1 PE=1 SV=1	13	0.0448044		G3XAK1 (+1)	82 kDa	8
118	Secreted phosphoprotein 24 OS=Homo sapiens GN=SPP2 PE=1 SV=1	13	0.0448044		Q13103	24 kDa	6
119	Angiopoietin-related protein 3 OS=Homo sapiens GN=ANGPTL3 PE=1 SV=1	12	0.0413579		Q9Y5C1	54 kDa	7
120	Cathelicidin antimicrobial peptide OS=Homo sapiens GN=CAMP PE=1 SV=1	12	0.0413579		J3KNB4 (+1)	20 kDa	7
121	Complement component C7 OS=Homo sapiens GN=C7 PE=1 SV=2	12	0.0413579		P10643	94 kDa	11
122	Ig lambda chain V-I region WAH OS=Homo sapiens PE=1 SV=1	12	0.0413579		P04208	12 kDa	3
123	Pigment epithelium-derived factor OS=Homo sapiens GN=SERPINF1 PE=1 SV=4	12	0.0413579		P36955	46 kDa	8
124	Actin, cytoplasmic 1 OS=Homo sapiens GN=ACTB PE=1 SV=1	11	0.0379114		P60709 (+1)	42 kDa	6
125	Apolipoprotein C-IV OS=Homo sapiens GN=APOC4 PE=1 SV=1	11	0.0379114		P55056	15 kDa	6
126	Fibulin-1 OS=Homo sapiens GN=FBLN1 PE=1 SV=1	11	0.0379114		B1AHL2 (+1)	78 kDa	9
127	Protein IGLV3-21 (Fragment) OS=Homo sapiens GN=IGLV3-21 PE=1 SV=1	11	0.0379114		A0A075B6J7	12 kDa	2
128	Thrombospondin-1 OS=Homo sapiens GN=THBS1 PE=1 SV=2	11	0.0379114		P07996	129 kDa	7
129	Vitamin D-binding protein OS=Homo sapiens GN=GC PE=1 SV=1	11	0.0379114		D6RF35	53 kDa	9
130	Protein S100-A8 OS=Homo sapiens GN=S100A8 PE=1 SV=1	10	0.0344649		P05109	11 kDa	3
131	Angiogenin OS=Homo sapiens GN=ANG PE=1 SV=1	9	0.0310184		P03950	17 kDa	6
132	Angiotensinogen OS=Homo sapiens GN=AGT PE=1 SV=1	9	0.0310184		P01019	53 kDa	5
133	Fibrinogen alpha chain OS=Homo sapiens GN=FGA PE=1 SV=2	9	0.0310184		P02671 (+1)	95 kDa	7
134	Glutathione peroxidase OS=Homo sapiens GN=GPX3 PE=1 SV=1	9	0.0310184		A0A087X1J7 (+1)	25 kDa	4
135	Ig kappa chain V-IV region JI OS=Homo sapiens PE=4 SV=1	9	0.0310184		P06313	15 kDa	4
136	Insulin-like growth factor-binding protein 7 OS=Homo sapiens GN=IGFBP7 PE=1 SV=1	9	0.0310184		Q16270 (+1)	29 kDa	3
137	Protein APOC4-APOC2 OS=Homo sapiens GN=APOC4-APOC2 PE=4 SV=1	9	0.0310184		K7ER74	20 kDa	3
138	Carboxypeptidase N subunit 2 OS=Homo sapiens GN=CPN2 PE=1 SV=3	8	0.0275719		P22792	61 kDa	5
139	Isoform 2 of Apolipoprotein M OS=Homo sapiens GN=APOM	8	0.0275719		O95445-2	13 kDa	5
140	Isoform 3 of Collagen alpha-1(XVIII) chain OS=Homo sapiens GN=COL18A1	8	0.0275719		P39060-2	136 kDa	6
141	Protein IGHV3-49 OS=Homo sapiens GN=IGHV3-49 PE=1 SV=1	8	0.0275719		A0A087WU91 (+1)	12 kDa	3
142	Adipocyte plasma membrane-associated protein (Fragment) OS=Homo sapiens GN=APMAP PE=1 SV=1	7	0.0241255		H0Y512	45 kDa	6
143	Alpha-1-antichymotrypsin OS=Homo sapiens GN=SERPINA3 PE=1 SV=2	7	0.0241255		P01011	48 kDa	5
144	Calsyntenin-1 OS=Homo sapiens GN=CLSTN1 PE=1 SV=1	7	0.0241255		O94985 (+1)	110 kDa	5
145	Creatine kinase M-type OS=Homo sapiens GN=CKM PE=1 SV=2	7	0.0241255		P06732	43 kDa	6
146	Hemoglobin subunit alpha OS=Homo sapiens GN=HBA1 PE=1 SV=2	7	0.0241255		P69905	15 kDa	4
147	Desmoplakin OS=Homo sapiens GN=DSP PE=1 SV=3	6	0.020679		P15924	332 kDa	3
148	Fructose-bisphosphate aldolase OS=Homo sapiens GN=ALDOA PE=1 SV=1	6	0.020679		J3KPS3 (+2)	40 kDa	4
149	Prenylcysteine oxidase 1 OS=Homo sapiens GN=PCYOX1 PE=1 SV=3	6	0.020679		Q9UHG3	57 kDa	5
150	Protein IGHV4-34 (Fragment) OS=Homo sapiens GN=IGHV4-34 PE=1 SV=1	6	0.020679		A0A0A0MS12	14 kDa	2
151	Protein IGLV3-19 (Fragment) OS=Homo sapiens GN=IGLV3-19 PE=1 SV=1	6	0.020679		A0A075B6J8	12 kDa	2
152	Retinoic acid receptor responder protein 2 OS=Homo sapiens GN=RARRES2 PE=1 SV=1	6	0.020679		Q99969	19 kDa	3
153	Alpha-enolase OS=Homo sapiens GN=ENO1 PE=1 SV=2	5	0.0172325		P06733	47 kDa	4
154	Cathepsin S OS=Homo sapiens GN=CTSS PE=1 SV=3	5	0.0172325		P25774	37 kDa	4
155	Flavin reductase (NADPH) OS=Homo sapiens GN=BLVRB PE=1 SV=3	5	0.0172325		P30043	22 kDa	5
156	Ig kappa chain V-II region TEW OS=Homo sapiens PE=1 SV=1	5	0.0172325		P01617	12 kDa	2
157	L-lactate dehydrogenase A chain OS=Homo sapiens GN=LDHA PE=1 SV=2	5	0.0172325		P00338 (+1)	37 kDa	4
158	Lysozyme C OS=Homo sapiens GN=LYZ PE=1 SV=1	5	0.0172325		P61626	17 kDa	5
159	Alpha-1-acid glycoprotein 2 OS=Homo sapiens GN=ORM2 PE=1 SV=2	4	0.013786		P19652	24 kDa	3
160	C-reactive protein OS=Homo sapiens GN=CRP PE=1 SV=1	4	0.013786		P02741	25 kDa	3
161	Cadherin-1 OS=Homo sapiens GN=CDH1 PE=1 SV=1	4	0.013786		H3BNC6	59 kDa	4
162	Phospholipase A1 member A OS=Homo sapiens GN=PLA1A PE=1 SV=1	4	0.013786		G5E9W0 (+3)	48 kDa	3
163	Ribonuclease 4 OS=Homo sapiens GN=RNASE4 PE=1 SV=3	4	0.013786		P34096	17 kDa	3
164	Ficolin-1 OS=Homo sapiens GN=FCN1 PE=1 SV=2	3	0.0103395		O00602	35 kDa	3
165	Glyceraldehyde-3-phosphate dehydrogenase OS=Homo sapiens GN=GAPDH PE=1 SV=3	3	0.0103395		P04406	36 kDa	2
166	Hemopexin OS=Homo sapiens GN=HPX PE=1 SV=2	3	0.0103395		P02790	52 kDa	3
167	Isoform M1 of Pyruvate kinase PKM OS=Homo sapiens GN=PKM	3	0.0103395		P14618-2	58 kDa	3
168	Keratinocyte proline-rich protein OS=Homo sapiens GN=KPRP PE=1 SV=1	3	0.0103395		Q5T749	64 kDa	2
169	Peptidyl-prolyl cis-trans isomerase A OS=Homo sapiens GN=PPIA PE=1 SV=2	3	0.0103395		P62937	18 kDa	3
170	Phosphatidylinositol-glycan-specific phospholipase D OS=Homo sapiens GN=GPLD1 PE=1 SV=3	3	0.0103395		P80108	92 kDa	2
171	Platelet basic protein OS=Homo sapiens GN=PPBP PE=1 SV=3	3	0.0103395		P02775	14 kDa	3
172	Platelet factor 4 OS=Homo sapiens GN=PF4 PE=1 SV=2	3	0.0103395		P02776	11 kDa	3
173	Protein JCHAIN (Fragment) OS=Homo sapiens GN=JCHAIN PE=1 SV=5	3	0.0103395		D6RD17 (+1)	18 kDa	3
174	Protein S100-A9 OS=Homo sapiens GN=S100A9 PE=1 SV=1	3	0.0103395		P06702	13 kDa	2
175	Alpha-1B-glycoprotein OS=Homo sapiens GN=A1BG PE=1 SV=4	2	0.00689299		P04217	54 kDa	2
176	Chondroadherin OS=Homo sapiens GN=CHAD PE=2 SV=2	2	0.00689299		O15335	40 kDa	2
177	Coagulation factor VIII OS=Homo sapiens GN=F8 PE=1 SV=1	2	0.00689299		P00451	267 kDa	2
178	Cystatin-A OS=Homo sapiens GN=CSTA PE=1 SV=1	2	0.00689299		P01040	11 kDa	2
179	Endoplasmin OS=Homo sapiens GN=HSP90B1 PE=1 SV=1	2	0.00689299		P14625	92 kDa	2
180	Inter-alpha-trypsin inhibitor heavy chain H3 OS=Homo sapiens GN=ITIH3 PE=1 SV=2	2	0.00689299		Q06033	100 kDa	2
181	Plectin OS=Homo sapiens GN=PLEC PE=1 SV=3	2	0.00689299		Q15149	532 kDa	2
		29015	100

## Sheet: B20 Repetition 2
Number	Identified Proteins	Spectrum Count B20 N°2	Relative abundance (%)	Sum	Accession Number	Molecular Weight	Peptide count
1	Complement C3 OS=Homo sapiens GN=C3 PE=1 SV=2	2578	9.28674		P01024	187 kDa	137
2	Apolipoprotein B-100 OS=Homo sapiens GN=APOB PE=1 SV=2	2577	9.28314	27760	P04114	516 kDa	264
3	Complement C4-A OS=Homo sapiens GN=C4A PE=1 SV=2	1373	4.94597		P0C0L4	193 kDa	105
4	Apolipoprotein A-I OS=Homo sapiens GN=APOA1 PE=1 SV=1	1159	4.17507		P02647	31 kDa	37
5	Serum albumin OS=Homo sapiens GN=ALB PE=1 SV=2	1061	3.82205		P02768	69 kDa	63
6	Apolipoprotein E OS=Homo sapiens GN=APOE PE=1 SV=1	899	3.23847		P02649	36 kDa	35
7	Prothrombin OS=Homo sapiens GN=F2 PE=1 SV=2	873	3.14481		P00734	70 kDa	46
8	Antithrombin-III OS=Homo sapiens GN=SERPINC1 PE=1 SV=1	839	3.02233		P01008	53 kDa	36
9	Complement factor H OS=Homo sapiens GN=CFH PE=1 SV=4	747	2.69092		P08603	139 kDa	77
10	Plasminogen OS=Homo sapiens GN=PLG PE=1 SV=2	725	2.61167		P00747	91 kDa	75
11	Vitronectin OS=Homo sapiens GN=VTN PE=1 SV=1	709	2.55403		P04004	54 kDa	42
12	C4b-binding protein alpha chain OS=Homo sapiens GN=C4BPA PE=1 SV=2	685	2.46758		P04003	67 kDa	43
13	Histidine-rich glycoprotein OS=Homo sapiens GN=HRG PE=1 SV=1	635	2.28746		P04196	60 kDa	50
14	Kininogen-1 OS=Homo sapiens GN=KNG1 PE=1 SV=2	603	2.17219		P01042	72 kDa	42
15	Isoform LMW of Kininogen-1 OS=Homo sapiens GN=KNG1	594	2.13977		P01042-2	48 kDa	3
16	Plasma kallikrein OS=Homo sapiens GN=KLKB1 PE=1 SV=1	524	1.88761		P03952	71 kDa	47
17	Plasma protease C1 inhibitor OS=Homo sapiens GN=SERPING1 PE=1 SV=2	505	1.81916		P05155	55 kDa	24
18	Coagulation factor XII OS=Homo sapiens GN=F12 PE=1 SV=3	483	1.73991		P00748	68 kDa	40
19	Alpha-2-macroglobulin OS=Homo sapiens GN=A2M PE=1 SV=3	425	1.53098		P01023	163 kDa	60
20	Uncharacterized protein OS=Homo sapiens PE=1 SV=1	410	1.47695		B4E1Z4	141 kDa	46
21	Ig gamma-3 chain C region OS=Homo sapiens GN=IGHG3 PE=1 SV=1	358	1.28963		A0A087WXL8	57 kDa	25
22	Gelsolin OS=Homo sapiens GN=GSN PE=1 SV=1	309	1.11311		P06396	86 kDa	41
23	Complement C1q subcomponent subunit B OS=Homo sapiens GN=C1QB PE=1 SV=1	302	1.0879		D6R934 (+1)	26 kDa	12
24	Ig gamma-1 chain C region OS=Homo sapiens GN=IGHG1 PE=1 SV=1	280	1.00865		A0A087WV47	51 kDa	3
25	Complement C1q subcomponent subunit C OS=Homo sapiens GN=C1QC PE=1 SV=3	273	0.983429		P02747	26 kDa	8
26	Ig gamma-1 chain C region OS=Homo sapiens GN=IGHG1 PE=1 SV=1	273	0.983429		A0A087WYE1	52 kDa	9
27	Complement C1r subcomponent OS=Homo sapiens GN=C1R PE=1 SV=1	249	0.896974		B4DPQ0	82 kDa	33
28	Ig mu chain C region OS=Homo sapiens GN=IGHM PE=1 SV=1	241	0.868156		A0A087X2C0	64 kDa	23
29	Carboxypeptidase B2 OS=Homo sapiens GN=CPB2 PE=1 SV=2	233	0.839337		Q96IY4	48 kDa	18
30	Ig kappa chain C region OS=Homo sapiens GN=IGKC PE=1 SV=1	213	0.767291		A0A087X130	25 kDa	2
31	Protein IGKV3-11 OS=Homo sapiens GN=IGKV3-11 PE=4 SV=1	212	0.763689		A0A087WZW8	26 kDa	16
32	Coagulation factor V OS=Homo sapiens GN=F5 PE=1 SV=1	208	0.74928		A0A0A0MRJ7 (+1)	252 kDa	52
33	Complement C1s subcomponent OS=Homo sapiens GN=C1S PE=1 SV=1	207	0.745677		P09871	77 kDa	30
34	Protein IGKV1-8 OS=Homo sapiens GN=IGKV1-8 PE=4 SV=1	207	0.745677		A0A087WWV8	26 kDa	2
35	Inter-alpha-trypsin inhibitor heavy chain H2 OS=Homo sapiens GN=ITIH2 PE=1 SV=2	189	0.680836		P19823 (+1)	106 kDa	27
36	Serum amyloid A-4 protein OS=Homo sapiens GN=SAA4 PE=1 SV=2	179	0.644813		P35542	15 kDa	10
37	Inter-alpha-trypsin inhibitor heavy chain H1 OS=Homo sapiens GN=ITIH1 PE=1 SV=3	171	0.615994		P19827	101 kDa	25
38	Complement C5 OS=Homo sapiens GN=C5 PE=1 SV=4	170	0.612392		P01031	188 kDa	52
39	Complement factor H-related protein 1 OS=Homo sapiens GN=CFHR1 PE=1 SV=2	169	0.60879		Q03591	38 kDa	6
40	Coagulation factor XI OS=Homo sapiens GN=F11 PE=1 SV=1	156	0.56196		P03951	70 kDa	29
41	Isoform 2 of Apolipoprotein L1 OS=Homo sapiens GN=APOL1	149	0.536744		O14791-2	46 kDa	22
42	Ig gamma-2 chain C region OS=Homo sapiens GN=IGHG2 PE=1 SV=2	144	0.518732		P01859	36 kDa	3
43	Coagulation factor X OS=Homo sapiens GN=F10 PE=1 SV=2	143	0.51513		P00742	55 kDa	14
44	Beta-2-glycoprotein 1 OS=Homo sapiens GN=APOH PE=1 SV=3	133	0.479107		P02749	38 kDa	19
45	Ig alpha-1 chain C region OS=Homo sapiens GN=IGHA1 PE=1 SV=2	133	0.479107		P01876	38 kDa	14
46	Alpha-1-antitrypsin OS=Homo sapiens GN=SERPINA1 PE=1 SV=3	127	0.457493		P01009	47 kDa	25
47	Complement component C8 beta chain OS=Homo sapiens GN=C8B PE=1 SV=3	120	0.432277		P07358	67 kDa	22
48	Plasma serine protease inhibitor OS=Homo sapiens GN=SERPINA5 PE=1 SV=3	115	0.414265		P05154	46 kDa	15
49	Complement component C9 OS=Homo sapiens GN=C9 PE=1 SV=2	111	0.399856		P02748	63 kDa	21
50	Isoform 2 of Clusterin OS=Homo sapiens GN=CLU	104	0.37464		P10909-2	58 kDa	16
51	Apolipoprotein C-I (Fragment) OS=Homo sapiens GN=APOC1 PE=1 SV=1	102	0.367435		K7ERI9 (+1)	9 kDa	10
52	Selenoprotein P OS=Homo sapiens GN=SEPP1 PE=1 SV=3	100	0.360231		P49908	43 kDa	10
53	Heparin cofactor 2 OS=Homo sapiens GN=SERPIND1 PE=1 SV=3	91	0.32781		P05546	57 kDa	16
54	Complement factor H-related protein 5 OS=Homo sapiens GN=CFHR5 PE=1 SV=1	90	0.324207		Q9BXR6	64 kDa	22
55	Immunoglobulin lambda-like polypeptide 5 OS=Homo sapiens GN=IGLL5 PE=1 SV=1	87	0.313401		A0A087WYR4	25 kDa	8
56	Ig alpha-2 chain C region OS=Homo sapiens GN=IGHA2 PE=1 SV=3	81	0.291787		P01877	37 kDa	2
57	Apolipoprotein A-IV OS=Homo sapiens GN=APOA4 PE=1 SV=3	80	0.288184		P06727	45 kDa	20
58	Sulfhydryl oxidase 1 OS=Homo sapiens GN=QSOX1 PE=1 SV=3	80	0.288184		O00391	83 kDa	29
59	Insulin-like growth factor-binding protein complex acid labile subunit OS=Homo sapiens GN=IGFALS PE=1 SV=1	79	0.284582		P35858 (+1)	66 kDa	18
60	Alpha-2-antiplasmin OS=Homo sapiens GN=SERPINF2 PE=1 SV=3	78	0.28098		P08697	55 kDa	14
61	Serum amyloid P-component OS=Homo sapiens GN=APCS PE=1 SV=2	73	0.262968		P02743	25 kDa	6
62	Coagulation factor IX OS=Homo sapiens GN=F9 PE=1 SV=2	70	0.252161		P00740	52 kDa	14
63	Complement component C8 alpha chain OS=Homo sapiens GN=C8A PE=1 SV=2	70	0.252161		P07357	65 kDa	15
64	Haptoglobin-related protein OS=Homo sapiens GN=HPR PE=2 SV=2	69	0.248559		P00739 (+1)	39 kDa	15
65	Complement C1q subcomponent subunit A OS=Homo sapiens GN=C1QA PE=1 SV=2	68	0.244957		P02745	26 kDa	8
66	Vitamin K-dependent protein S OS=Homo sapiens GN=PROS1 PE=1 SV=1	64	0.230548		P07225	75 kDa	18
67	Isoform F of Proteoglycan 4 OS=Homo sapiens GN=PRG4	63	0.226945		Q92954-6	146 kDa	17
68	Apolipoprotein A-II OS=Homo sapiens GN=APOA2 PE=1 SV=1	61	0.219741		P02652 (+1)	11 kDa	6
69	Haptoglobin OS=Homo sapiens GN=HP PE=1 SV=1	61	0.219741		P00738 (+2)	45 kDa	7
70	Complement factor H-related protein 2 OS=Homo sapiens GN=CFHR2 PE=1 SV=1	60	0.216138		P36980	31 kDa	4
71	Inter-alpha-trypsin inhibitor heavy chain H4 OS=Homo sapiens GN=ITIH4 PE=1 SV=4	56	0.201729		Q14624	103 kDa	20
72	Hepatocyte growth factor activator OS=Homo sapiens GN=HGFAC PE=1 SV=1	53	0.190922		D6RAR4 (+1)	71 kDa	12
73	Carboxypeptidase N catalytic chain OS=Homo sapiens GN=CPN1 PE=1 SV=1	52	0.18732		P15169	52 kDa	11
74	Tetranectin OS=Homo sapiens GN=CLEC3B PE=1 SV=3	52	0.18732		P05452	23 kDa	9
75	Apolipoprotein(a) OS=Homo sapiens GN=LPA PE=1 SV=1	49	0.176513		P08519	501 kDa	21
76	Complement component C8 gamma chain OS=Homo sapiens GN=C8G PE=1 SV=3	48	0.172911		P07360	22 kDa	10
77	Serotransferrin OS=Homo sapiens GN=TF PE=1 SV=3	48	0.172911		P02787	77 kDa	27
78	Properdin OS=Homo sapiens GN=CFP PE=1 SV=2	47	0.169308		P27918	51 kDa	15
79	Transthyretin OS=Homo sapiens GN=TTR PE=1 SV=1	47	0.169308		P02766	16 kDa	8
80	78 kDa glucose-regulated protein OS=Homo sapiens GN=HSPA5 PE=1 SV=2	44	0.158501		P11021	72 kDa	13
81	Ceruloplasmin OS=Homo sapiens GN=CP PE=1 SV=1	44	0.158501		P00450	122 kDa	17
82	Insulin-like growth factor-binding protein 3 OS=Homo sapiens GN=IGFBP3 PE=1 SV=2	42	0.151297		P17936 (+1)	32 kDa	16
83	Apolipoprotein D (Fragment) OS=Homo sapiens GN=APOD PE=1 SV=1	41	0.147695		C9JF17 (+1)	24 kDa	6
84	Vitamin K-dependent protein C OS=Homo sapiens GN=PROC PE=1 SV=1	38	0.136888		P04070	52 kDa	9
85	Ig kappa chain V-III region HAH OS=Homo sapiens PE=2 SV=1	37	0.133285		P18135	14 kDa	7
86	Hyaluronan-binding protein 2 OS=Homo sapiens GN=HABP2 PE=1 SV=1	36	0.129683		Q14520	63 kDa	14
87	Isoform 2 of Complement factor H-related protein 3 OS=Homo sapiens GN=CFHR3	36	0.129683		Q02985-2	31 kDa	7
88	Ig delta chain C region OS=Homo sapiens GN=IGHD PE=1 SV=1	34	0.122478		A0A087WUS7	42 kDa	8
89	Hornerin OS=Homo sapiens GN=HRNR PE=1 SV=2	33	0.118876		Q86YZ3	282 kDa	11
90	Isoform 2 of C4b-binding protein beta chain OS=Homo sapiens GN=C4BPB	33	0.118876		P20851-2	28 kDa	7
91	Procollagen C-endopeptidase enhancer 1 OS=Homo sapiens GN=PCOLCE PE=1 SV=2	33	0.118876		Q15113	48 kDa	12
92	Protein Z-dependent protease inhibitor OS=Homo sapiens GN=SERPINA10 PE=1 SV=1	33	0.118876		G3V2W1	55 kDa	12
93	Serum paraoxonase/arylesterase 1 OS=Homo sapiens GN=PON1 PE=1 SV=3	33	0.118876		P27169	40 kDa	9
94	Mannan-binding lectin serine protease 1 OS=Homo sapiens GN=MASP1 PE=1 SV=3	32	0.115274		P48740	79 kDa	10
95	N-acetylmuramoyl-L-alanine amidase OS=Homo sapiens GN=PGLYRP2 PE=1 SV=1	32	0.115274		Q96PD5	62 kDa	9
96	Protein AMBP OS=Homo sapiens GN=AMBP PE=1 SV=1	30	0.108069		P02760	39 kDa	9
97	Complement component C6 OS=Homo sapiens GN=C6 PE=1 SV=3	27	0.0972622		P13671	105 kDa	13
98	Kallistatin OS=Homo sapiens GN=SERPINA4 PE=1 SV=3	26	0.0936599		P29622	49 kDa	13
99	Alpha-2-HS-glycoprotein OS=Homo sapiens GN=AHSG PE=1 SV=1	25	0.0900576		P02765	39 kDa	8
100	Fibronectin OS=Homo sapiens GN=FN1 PE=1 SV=4	25	0.0900576		P02751 (+6)	263 kDa	16
101	Dermcidin OS=Homo sapiens GN=DCD PE=1 SV=2	24	0.0864553		P81605	11 kDa	4
102	Hemoglobin subunit beta OS=Homo sapiens GN=HBB PE=1 SV=2	24	0.0864553		P68871	16 kDa	11
103	Lactotransferrin (Fragment) OS=Homo sapiens GN=LTF PE=1 SV=1	23	0.082853		E7EQB2 (+2)	77 kDa	16
104	Fibrinogen gamma chain OS=Homo sapiens GN=FGG PE=1 SV=3	22	0.0792507		P02679 (+3)	52 kDa	10
105	Lipopolysaccharide-binding protein OS=Homo sapiens GN=LBP PE=1 SV=3	22	0.0792507		P18428	53 kDa	10
106	Protein IGHV3-74 (Fragment) OS=Homo sapiens GN=IGHV3-74 PE=1 SV=1	22	0.0792507		A0A0B4J1X5	13 kDa	3
107	CD5 antigen-like OS=Homo sapiens GN=CD5L PE=1 SV=1	21	0.0756484		O43866	38 kDa	12
108	Cartilage acidic protein 1 OS=Homo sapiens GN=CRTAC1 PE=1 SV=1	18	0.0648415		A0A0C4DFP6 (+1)	70 kDa	11
109	Cathelicidin antimicrobial peptide OS=Homo sapiens GN=CAMP PE=1 SV=1	18	0.0648415		J3KNB4 (+1)	20 kDa	8
110	Complement component C7 OS=Homo sapiens GN=C7 PE=1 SV=2	17	0.0612392		P10643	94 kDa	14
111	Fibrinogen beta chain OS=Homo sapiens GN=FGB PE=1 SV=2	17	0.0612392		P02675	56 kDa	11
112	Coagulation factor VII OS=Homo sapiens GN=F7 PE=1 SV=2	16	0.0576369		F5H8B0 (+2)	42 kDa	6
113	Ficolin-3 OS=Homo sapiens GN=FCN3 PE=1 SV=2	16	0.0576369		O75636	33 kDa	8
114	Transforming growth factor-beta-induced protein ig-h3 OS=Homo sapiens GN=TGFBI PE=1 SV=1	16	0.0576369		Q15582	75 kDa	13
115	Complement factor D OS=Homo sapiens GN=CFD PE=1 SV=1	15	0.0540346		K7ERG9	28 kDa	8
116	Protein IGHV5-51 (Fragment) OS=Homo sapiens GN=IGHV5-51 PE=1 SV=1	15	0.0540346		A0A0C4DH38	13 kDa	3
117	Apolipoprotein C-IV OS=Homo sapiens GN=APOC4 PE=1 SV=1	14	0.0504323		P55056	15 kDa	6
118	Complement factor I OS=Homo sapiens GN=CFI PE=1 SV=1	14	0.0504323		E7ETH0 (+2)	67 kDa	11
119	Glutathione peroxidase OS=Homo sapiens GN=GPX3 PE=1 SV=1	14	0.0504323		A0A087X1J7 (+1)	25 kDa	5
120	Hepatocyte growth factor-like protein OS=Homo sapiens GN=MST1 PE=1 SV=1	13	0.04683		G3XAK1 (+1)	82 kDa	10
121	Isoform 2 of Apolipoprotein M OS=Homo sapiens GN=APOM	13	0.04683		O95445-2	13 kDa	8
122	Secreted phosphoprotein 24 OS=Homo sapiens GN=SPP2 PE=1 SV=1	13	0.04683		Q13103	24 kDa	7
123	Alpha-1-antichymotrypsin OS=Homo sapiens GN=SERPINA3 PE=1 SV=2	12	0.0432277		P01011	48 kDa	9
124	Pigment epithelium-derived factor OS=Homo sapiens GN=SERPINF1 PE=1 SV=4	12	0.0432277		P36955	46 kDa	8
125	Protein IGLV3-21 (Fragment) OS=Homo sapiens GN=IGLV3-21 PE=1 SV=1	12	0.0432277		A0A075B6J7	12 kDa	4
126	Vitamin D-binding protein OS=Homo sapiens GN=GC PE=1 SV=1	12	0.0432277		D6RF35	53 kDa	9
127	Fibulin-1 OS=Homo sapiens GN=FBLN1 PE=1 SV=1	11	0.0396254		B1AHL2 (+1)	78 kDa	10
128	Ig lambda chain V-I region WAH OS=Homo sapiens PE=1 SV=1	11	0.0396254		P04208	12 kDa	2
129	Desmoplakin OS=Homo sapiens GN=DSP PE=1 SV=3	10	0.0360231		P15924	332 kDa	8
130	Hemoglobin subunit alpha OS=Homo sapiens GN=HBA1 PE=1 SV=2	10	0.0360231		P69905	15 kDa	5
131	Insulin-like growth factor-binding protein 2 OS=Homo sapiens GN=IGFBP2 PE=1 SV=2	10	0.0360231		P18065	35 kDa	5
132	Actin, cytoplasmic 1 OS=Homo sapiens GN=ACTB PE=1 SV=1	9	0.0324207		P60709 (+1)	42 kDa	6
133	Insulin-like growth factor-binding protein 7 OS=Homo sapiens GN=IGFBP7 PE=1 SV=1	9	0.0324207		Q16270 (+1)	29 kDa	5
134	Multiple inositol polyphosphate phosphatase 1 OS=Homo sapiens GN=MINPP1 PE=1 SV=1	9	0.0324207		Q9UNW1	55 kDa	6
135	Protein APOC4-APOC2 OS=Homo sapiens GN=APOC4-APOC2 PE=4 SV=1	9	0.0324207		K7ER74	20 kDa	2
136	Protein IGLV3-19 (Fragment) OS=Homo sapiens GN=IGLV3-19 PE=1 SV=1	9	0.0324207		A0A075B6J8	12 kDa	4
137	Protein S100-A8 OS=Homo sapiens GN=S100A8 PE=1 SV=1	9	0.0324207		P05109	11 kDa	3
138	Angiopoietin-related protein 3 OS=Homo sapiens GN=ANGPTL3 PE=1 SV=1	8	0.0288184		Q9Y5C1	54 kDa	6
139	Angiotensinogen OS=Homo sapiens GN=AGT PE=1 SV=1	8	0.0288184		P01019	53 kDa	7
140	Carboxypeptidase N subunit 2 OS=Homo sapiens GN=CPN2 PE=1 SV=3	8	0.0288184		P22792	61 kDa	5
141	Nicotinate phosphoribosyltransferase (Fragment) OS=Homo sapiens GN=NAPRT PE=1 SV=1	8	0.0288184		H0YDA6	14 kDa	3
142	Protein IGHV4-34 (Fragment) OS=Homo sapiens GN=IGHV4-34 PE=1 SV=1	8	0.0288184		A0A0A0MS12	14 kDa	3
143	Protein IGLV3-25 (Fragment) OS=Homo sapiens GN=IGLV3-25 PE=1 SV=2	8	0.0288184		A0A075B6J4	12 kDa	3
144	Filaggrin-2 OS=Homo sapiens GN=FLG2 PE=1 SV=1	7	0.0252161		Q5D862	248 kDa	3
145	Flavin reductase (NADPH) OS=Homo sapiens GN=BLVRB PE=1 SV=3	7	0.0252161		P30043	22 kDa	5
146	Isoform M1 of Pyruvate kinase PKM OS=Homo sapiens GN=PKM	7	0.0252161		P14618-2	58 kDa	6
147	Protein IGHV3-49 OS=Homo sapiens GN=IGHV3-49 PE=1 SV=1	7	0.0252161		A0A087WU91 (+1)	12 kDa	2
148	Thrombospondin-1 OS=Homo sapiens GN=THBS1 PE=1 SV=2	7	0.0252161		P07996	129 kDa	6
149	Angiogenin OS=Homo sapiens GN=ANG PE=1 SV=1	6	0.0216138		P03950	17 kDa	4
150	Fibrinogen alpha chain OS=Homo sapiens GN=FGA PE=1 SV=2	6	0.0216138		P02671 (+1)	95 kDa	5
151	Ig kappa chain V-II region TEW OS=Homo sapiens PE=1 SV=1	6	0.0216138		P01617	12 kDa	2
152	Ig kappa chain V-III region B6 OS=Homo sapiens PE=1 SV=1	6	0.0216138		P01619	12 kDa	2
153	Isoform 3 of Collagen alpha-1(XVIII) chain OS=Homo sapiens GN=COL18A1	6	0.0216138		P39060-2	136 kDa	5
154	Lysozyme C OS=Homo sapiens GN=LYZ PE=1 SV=1	6	0.0216138		P61626	17 kDa	5
155	Retinoic acid receptor responder protein 2 OS=Homo sapiens GN=RARRES2 PE=1 SV=1	6	0.0216138		Q99969	19 kDa	2
156	Filaggrin OS=Homo sapiens GN=FLG PE=1 SV=3	5	0.0180115		P20930	435 kDa	3
157	Hemopexin OS=Homo sapiens GN=HPX PE=1 SV=2	5	0.0180115		P02790	52 kDa	5
158	Ig kappa chain V-IV region JI OS=Homo sapiens PE=4 SV=1	5	0.0180115		P06313	15 kDa	3
159	Junction plakoglobin OS=Homo sapiens GN=JUP PE=1 SV=3	5	0.0180115		P14923	82 kDa	5
160	Protein JCHAIN (Fragment) OS=Homo sapiens GN=JCHAIN PE=1 SV=5	5	0.0180115		D6RD17 (+1)	18 kDa	4
161	Adipocyte plasma membrane-associated protein (Fragment) OS=Homo sapiens GN=APMAP PE=1 SV=1	4	0.0144092		H0Y512	45 kDa	4
162	C-reactive protein OS=Homo sapiens GN=CRP PE=1 SV=1	4	0.0144092		P02741	25 kDa	3
163	Cadherin-1 OS=Homo sapiens GN=CDH1 PE=1 SV=1	4	0.0144092		H3BNC6	59 kDa	3
164	Cathepsin S OS=Homo sapiens GN=CTSS PE=1 SV=3	4	0.0144092		P25774	37 kDa	4
165	Creatine kinase M-type OS=Homo sapiens GN=CKM PE=1 SV=2	4	0.0144092		P06732	43 kDa	3
166	Desmoglein-1 OS=Homo sapiens GN=DSG1 PE=1 SV=2	4	0.0144092		Q02413	114 kDa	4
167	Endoplasmin OS=Homo sapiens GN=HSP90B1 PE=1 SV=1	4	0.0144092		P14625	92 kDa	4
168	Keratinocyte proline-rich protein OS=Homo sapiens GN=KPRP PE=1 SV=1	4	0.0144092		Q5T749	64 kDa	4
169	Platelet factor 4 OS=Homo sapiens GN=PF4 PE=1 SV=2	4	0.0144092		P02776	11 kDa	4
170	Ribonuclease 4 OS=Homo sapiens GN=RNASE4 PE=1 SV=3	4	0.0144092		P34096	17 kDa	4
171	Alpha-1B-glycoprotein OS=Homo sapiens GN=A1BG PE=1 SV=4	3	0.0108069		P04217	54 kDa	2
172	Fructose-bisphosphate aldolase OS=Homo sapiens GN=ALDOA PE=1 SV=1	3	0.0108069		J3KPS3 (+2)	40 kDa	3
173	Insulin-like growth factor-binding protein 4 OS=Homo sapiens GN=IGFBP4 PE=1 SV=2	3	0.0108069		P22692	28 kDa	3
174	Inter-alpha-trypsin inhibitor heavy chain H3 OS=Homo sapiens GN=ITIH3 PE=1 SV=2	3	0.0108069		Q06033	100 kDa	3
175	Isoform 2 of Annexin A2 OS=Homo sapiens GN=ANXA2	3	0.0108069		P07355-2	40 kDa	3
176	Nebulin OS=Homo sapiens GN=NEB PE=1 SV=1	3	0.0108069		A0A087X1N7 (+2)	991 kDa	3
177	Platelet basic protein OS=Homo sapiens GN=PPBP PE=1 SV=3	3	0.0108069		P02775	14 kDa	2
178	Prenylcysteine oxidase 1 OS=Homo sapiens GN=PCYOX1 PE=1 SV=3	3	0.0108069		Q9UHG3	57 kDa	3
179	Protein S100-A3 OS=Homo sapiens GN=S100A3 PE=1 SV=1	3	0.0108069		P33764	12 kDa	3
180	V-set and immunoglobulin domain-containing protein 8 OS=Homo sapiens GN=VSIG8 PE=2 SV=1	3	0.0108069		Q5VU13	44 kDa	2
181	Alpha-1-acid glycoprotein 2 OS=Homo sapiens GN=ORM2 PE=1 SV=2	2	0.00720461		P19652	24 kDa	2
182	Alpha-enolase OS=Homo sapiens GN=ENO1 PE=1 SV=2	2	0.00720461		P06733	47 kDa	2
183	Calsyntenin-1 OS=Homo sapiens GN=CLSTN1 PE=1 SV=1	2	0.00720461		O94985 (+1)	110 kDa	2
184	Chondroadherin OS=Homo sapiens GN=CHAD PE=2 SV=2	2	0.00720461		O15335	40 kDa	2
185	Coagulation factor VIII OS=Homo sapiens GN=F8 PE=1 SV=1	2	0.00720461		P00451	267 kDa	2
186	Ficolin-1 OS=Homo sapiens GN=FCN1 PE=1 SV=2	2	0.00720461		O00602	35 kDa	2
187	IgGFc-binding protein OS=Homo sapiens GN=FCGBP PE=1 SV=1	2	0.00720461		A0A087WXI2 (+1)	445 kDa	2
188	L-lactate dehydrogenase A chain OS=Homo sapiens GN=LDHA PE=1 SV=2	2	0.00720461		P00338 (+1)	37 kDa	2
189	Peptidyl-prolyl cis-trans isomerase A OS=Homo sapiens GN=PPIA PE=1 SV=2	2	0.00720461		P62937	18 kDa	2
190	Phosphatidylinositol-glycan-specific phospholipase D OS=Homo sapiens GN=GPLD1 PE=1 SV=3	2	0.00720461		P80108	92 kDa	2
191	Phospholipase A1 member A OS=Homo sapiens GN=PLA1A PE=1 SV=1	2	0.00720461		G5E9W0 (+3)	48 kDa	2
192	Plectin OS=Homo sapiens GN=PLEC PE=1 SV=3	2	0.00720461		Q15149	532 kDa	2
		27760	100

## Sheet: B20 Repetition 3
Number	Identified Proteins	Spectrum Count B20 N°3	Relative abundance (%)	Sum	Accession Number	Molecular Weight	Peptide count
1	Complement C3 OS=Homo sapiens GN=C3 PE=1 SV=2	2805	9.38002		P01024	187 kDa	126
2	Apolipoprotein B-100 OS=Homo sapiens GN=APOB PE=1 SV=2	2127	7.11276	29904	P04114	516 kDa	242
3	Complement C4-A OS=Homo sapiens GN=C4A PE=1 SV=2	1431	4.78531		P0C0L4	193 kDa	103
4	Serum albumin OS=Homo sapiens GN=ALB PE=1 SV=2	1378	4.60808		P02768	69 kDa	73
5	Prothrombin OS=Homo sapiens GN=F2 PE=1 SV=2	1081	3.6149		P00734	70 kDa	47
6	Apolipoprotein A-I OS=Homo sapiens GN=APOA1 PE=1 SV=1	1072	3.5848		P02647	31 kDa	40
7	Apolipoprotein E OS=Homo sapiens GN=APOE PE=1 SV=1	1002	3.35072		P02649	36 kDa	36
8	Antithrombin-III OS=Homo sapiens GN=SERPINC1 PE=1 SV=1	956	3.1969		P01008	53 kDa	43
9	Vitronectin OS=Homo sapiens GN=VTN PE=1 SV=1	842	2.81568		P04004	54 kDa	40
10	Plasma kallikrein OS=Homo sapiens GN=KLKB1 PE=1 SV=1	797	2.6652		P03952	71 kDa	46
11	Kininogen-1 OS=Homo sapiens GN=KNG1 PE=1 SV=2	765	2.55819		P01042	72 kDa	45
12	Plasminogen OS=Homo sapiens GN=PLG PE=1 SV=2	765	2.55819		P00747	91 kDa	71
13	Histidine-rich glycoprotein OS=Homo sapiens GN=HRG PE=1 SV=1	750	2.50803		P04196	60 kDa	49
14	Isoform LMW of Kininogen-1 OS=Homo sapiens GN=KNG1	750	2.50803		P01042-2	48 kDa	2
15	Complement factor H OS=Homo sapiens GN=CFH PE=1 SV=4	647	2.16359		P08603	139 kDa	76
16	C4b-binding protein alpha chain OS=Homo sapiens GN=C4BPA PE=1 SV=2	593	1.98301		P04003	67 kDa	42
17	Coagulation factor XII OS=Homo sapiens GN=F12 PE=1 SV=3	590	1.97298		P00748	68 kDa	48
18	Plasma protease C1 inhibitor OS=Homo sapiens GN=SERPING1 PE=1 SV=2	504	1.68539		P05155	55 kDa	28
19	Uncharacterized protein OS=Homo sapiens PE=1 SV=1	406	1.35768		B4E1Z4	141 kDa	47
20	Alpha-2-macroglobulin OS=Homo sapiens GN=A2M PE=1 SV=3	401	1.34096		P01023	163 kDa	58
21	Ig gamma-3 chain C region OS=Homo sapiens GN=IGHG3 PE=1 SV=1	398	1.33093		A0A087WXL8	57 kDa	27
22	Gelsolin OS=Homo sapiens GN=GSN PE=1 SV=1	378	1.26404		P06396	86 kDa	38
23	Complement C1q subcomponent subunit B OS=Homo sapiens GN=C1QB PE=1 SV=1	319	1.06675		D6R934 (+1)	26 kDa	14
24	Ig gamma-1 chain C region OS=Homo sapiens GN=IGHG1 PE=1 SV=1	299	0.999866		A0A087WV47	51 kDa	3
25	Complement C1q subcomponent subunit C OS=Homo sapiens GN=C1QC PE=1 SV=3	294	0.983146		P02747	26 kDa	9
26	Ig gamma-1 chain C region OS=Homo sapiens GN=IGHG1 PE=1 SV=1	292	0.976458		A0A087WYE1	52 kDa	9
27	Complement factor H-related protein 1 OS=Homo sapiens GN=CFHR1 PE=1 SV=2	286	0.956394		Q03591	38 kDa	7
28	Coagulation factor V OS=Homo sapiens GN=F5 PE=1 SV=1	246	0.822632		A0A0A0MRJ7 (+1)	252 kDa	49
29	Carboxypeptidase B2 OS=Homo sapiens GN=CPB2 PE=1 SV=2	235	0.785848		Q96IY4	48 kDa	18
30	Protein IGKV3-11 OS=Homo sapiens GN=IGKV3-11 PE=4 SV=1	225	0.752408		A0A087WZW8	26 kDa	15
31	Ig mu chain C region OS=Homo sapiens GN=IGHM PE=1 SV=1	222	0.742376		A0A087X2C0	64 kDa	20
32	Protein IGKV1-8 OS=Homo sapiens GN=IGKV1-8 PE=4 SV=1	220	0.735688		A0A087WWV8	26 kDa	2
33	Coagulation factor XI OS=Homo sapiens GN=F11 PE=1 SV=1	206	0.688871		P03951	70 kDa	31
34	Inter-alpha-trypsin inhibitor heavy chain H2 OS=Homo sapiens GN=ITIH2 PE=1 SV=2	203	0.678839		P19823 (+1)	106 kDa	27
35	Complement C1r subcomponent OS=Homo sapiens GN=C1R PE=1 SV=1	200	0.668807		B4DPQ0	82 kDa	32
36	Complement C1s subcomponent OS=Homo sapiens GN=C1S PE=1 SV=1	193	0.645399		P09871	77 kDa	28
37	Inter-alpha-trypsin inhibitor heavy chain H1 OS=Homo sapiens GN=ITIH1 PE=1 SV=3	187	0.625334		P19827	101 kDa	25
38	Serum amyloid A-4 protein OS=Homo sapiens GN=SAA4 PE=1 SV=2	181	0.60527		P35542	15 kDa	8
39	Complement C5 OS=Homo sapiens GN=C5 PE=1 SV=4	178	0.595238		P01031	188 kDa	56
40	Isoform 2 of Apolipoprotein L1 OS=Homo sapiens GN=APOL1	177	0.591894		O14791-2	46 kDa	22
41	Plasma serine protease inhibitor OS=Homo sapiens GN=SERPINA5 PE=1 SV=3	169	0.565142		P05154	46 kDa	17
42	Complement factor H-related protein 5 OS=Homo sapiens GN=CFHR5 PE=1 SV=1	161	0.53839		Q9BXR6	64 kDa	23
43	Ig gamma-2 chain C region OS=Homo sapiens GN=IGHG2 PE=1 SV=2	148	0.494917		P01859	36 kDa	3
44	Coagulation factor X OS=Homo sapiens GN=F10 PE=1 SV=2	136	0.454789		P00742	55 kDa	14
45	Complement component C8 beta chain OS=Homo sapiens GN=C8B PE=1 SV=3	130	0.434724		P07358	67 kDa	22
46	Ig alpha-1 chain C region OS=Homo sapiens GN=IGHA1 PE=1 SV=2	130	0.434724		P01876	38 kDa	14
47	Alpha-1-antitrypsin OS=Homo sapiens GN=SERPINA1 PE=1 SV=3	129	0.43138		P01009	47 kDa	23
48	Beta-2-glycoprotein 1 OS=Homo sapiens GN=APOH PE=1 SV=3	129	0.43138		P02749	38 kDa	20
49	Complement component C9 OS=Homo sapiens GN=C9 PE=1 SV=2	121	0.404628		P02748	63 kDa	19
50	Complement factor H-related protein 2 OS=Homo sapiens GN=CFHR2 PE=1 SV=1	112	0.374532		P36980	31 kDa	3
51	Apolipoprotein C-I (Fragment) OS=Homo sapiens GN=APOC1 PE=1 SV=1	108	0.361156		K7ERI9 (+1)	9 kDa	8
52	Selenoprotein P OS=Homo sapiens GN=SEPP1 PE=1 SV=3	107	0.357812		P49908	43 kDa	10
53	Apolipoprotein A-IV OS=Homo sapiens GN=APOA4 PE=1 SV=3	105	0.351124		P06727	45 kDa	21
54	Isoform 2 of Clusterin OS=Homo sapiens GN=CLU	103	0.344436		P10909-2	58 kDa	17
55	Complement C1q subcomponent subunit A OS=Homo sapiens GN=C1QA PE=1 SV=2	86	0.287587		P02745	26 kDa	9
56	Haptoglobin OS=Homo sapiens GN=HP PE=1 SV=1	85	0.284243		P00738 (+2)	45 kDa	7
57	Immunoglobulin lambda-like polypeptide 5 OS=Homo sapiens GN=IGLL5 PE=1 SV=1	85	0.284243		A0A087WYR4	25 kDa	7
58	Carboxypeptidase N catalytic chain OS=Homo sapiens GN=CPN1 PE=1 SV=1	82	0.274211		P15169	52 kDa	14
59	Haptoglobin-related protein OS=Homo sapiens GN=HPR PE=2 SV=2	82	0.274211		P00739 (+1)	39 kDa	17
60	Ig alpha-2 chain C region OS=Homo sapiens GN=IGHA2 PE=1 SV=3	82	0.274211		P01877	37 kDa	2
61	Coagulation factor IX OS=Homo sapiens GN=F9 PE=1 SV=2	80	0.267523		P00740	52 kDa	16
62	Heparin cofactor 2 OS=Homo sapiens GN=SERPIND1 PE=1 SV=3	80	0.267523		P05546	57 kDa	12
63	Isoform F of Proteoglycan 4 OS=Homo sapiens GN=PRG4	80	0.267523		Q92954-6	146 kDa	16
64	Sulfhydryl oxidase 1 OS=Homo sapiens GN=QSOX1 PE=1 SV=3	77	0.257491		O00391	83 kDa	27
65	Alpha-2-antiplasmin OS=Homo sapiens GN=SERPINF2 PE=1 SV=3	75	0.250803		P08697	55 kDa	14
66	Complement component C8 alpha chain OS=Homo sapiens GN=C8A PE=1 SV=2	73	0.244114		P07357	65 kDa	17
67	Insulin-like growth factor-binding protein complex acid labile subunit OS=Homo sapiens GN=IGFALS PE=1 SV=1	72	0.24077		P35858 (+1)	66 kDa	17
68	Vitamin K-dependent protein S OS=Homo sapiens GN=PROS1 PE=1 SV=1	72	0.24077		P07225	75 kDa	19
69	Serum paraoxonase/arylesterase 1 OS=Homo sapiens GN=PON1 PE=1 SV=3	69	0.230738		P27169	40 kDa	10
70	Insulin-like growth factor-binding protein 3 OS=Homo sapiens GN=IGFBP3 PE=1 SV=2	64	0.214018		P17936 (+1)	32 kDa	15
71	Inter-alpha-trypsin inhibitor heavy chain H4 OS=Homo sapiens GN=ITIH4 PE=1 SV=4	60	0.200642		Q14624	103 kDa	20
72	Hepatocyte growth factor activator OS=Homo sapiens GN=HGFAC PE=1 SV=1	57	0.19061		D6RAR4 (+1)	71 kDa	10
73	Transthyretin OS=Homo sapiens GN=TTR PE=1 SV=1	57	0.19061		P02766	16 kDa	10
74	Hornerin OS=Homo sapiens GN=HRNR PE=1 SV=2	56	0.187266		Q86YZ3	282 kDa	19
75	Desmoplakin OS=Homo sapiens GN=DSP PE=1 SV=3	55	0.183922		P15924	332 kDa	37
76	Serotransferrin OS=Homo sapiens GN=TF PE=1 SV=3	54	0.180578		P02787	77 kDa	26
77	Serum amyloid P-component OS=Homo sapiens GN=APCS PE=1 SV=2	54	0.180578		P02743	25 kDa	6
78	Vitamin K-dependent protein C OS=Homo sapiens GN=PROC PE=1 SV=1	53	0.177234		P04070	52 kDa	11
79	CD5 antigen-like OS=Homo sapiens GN=CD5L PE=1 SV=1	52	0.17389		O43866	38 kDa	14
80	Apolipoprotein A-II OS=Homo sapiens GN=APOA2 PE=1 SV=1	51	0.170546		P02652 (+1)	11 kDa	7
81	78 kDa glucose-regulated protein OS=Homo sapiens GN=HSPA5 PE=1 SV=2	50	0.167202		P11021	72 kDa	13
82	Properdin OS=Homo sapiens GN=CFP PE=1 SV=2	49	0.163858		P27918	51 kDa	18
83	Complement component C8 gamma chain OS=Homo sapiens GN=C8G PE=1 SV=3	48	0.160514		P07360	22 kDa	10
84	Apolipoprotein D (Fragment) OS=Homo sapiens GN=APOD PE=1 SV=1	45	0.150482		C9JF17 (+1)	24 kDa	6
85	Protein Z-dependent protease inhibitor OS=Homo sapiens GN=SERPINA10 PE=1 SV=1	45	0.150482		G3V2W1	55 kDa	10
86	Isoform 2 of C4b-binding protein beta chain OS=Homo sapiens GN=C4BPB	44	0.147138		P20851-2	28 kDa	8
87	Ceruloplasmin OS=Homo sapiens GN=CP PE=1 SV=1	43	0.143793		P00450	122 kDa	15
88	Tetranectin OS=Homo sapiens GN=CLEC3B PE=1 SV=3	43	0.143793		P05452	23 kDa	8
89	Isoform 2 of Complement factor H-related protein 3 OS=Homo sapiens GN=CFHR3	40	0.133761		Q02985-2	31 kDa	6
90	Apolipoprotein(a) OS=Homo sapiens GN=LPA PE=1 SV=1	39	0.130417		P08519	501 kDa	18
91	Fibrinogen beta chain OS=Homo sapiens GN=FGB PE=1 SV=2	37	0.123729		P02675	56 kDa	16
92	Ig delta chain C region OS=Homo sapiens GN=IGHD PE=1 SV=1	37	0.123729		A0A087WUS7	42 kDa	7
93	Procollagen C-endopeptidase enhancer 1 OS=Homo sapiens GN=PCOLCE PE=1 SV=2	37	0.123729		Q15113	48 kDa	11
94	Ig kappa chain V-III region HAH OS=Homo sapiens PE=2 SV=1	36	0.120385		P18135	14 kDa	8
95	Protein AMBP OS=Homo sapiens GN=AMBP PE=1 SV=1	33	0.110353		P02760	39 kDa	11
96	Hyaluronan-binding protein 2 OS=Homo sapiens GN=HABP2 PE=1 SV=1	32	0.107009		Q14520	63 kDa	12
97	Fibronectin OS=Homo sapiens GN=FN1 PE=1 SV=4	30	0.100321		P02751 (+6)	263 kDa	19
98	N-acetylmuramoyl-L-alanine amidase OS=Homo sapiens GN=PGLYRP2 PE=1 SV=1	30	0.100321		Q96PD5	62 kDa	8
99	Mannan-binding lectin serine protease 1 OS=Homo sapiens GN=MASP1 PE=1 SV=3	29	0.096977		P48740	79 kDa	11
100	Complement component C6 OS=Homo sapiens GN=C6 PE=1 SV=3	26	0.0869449		P13671	105 kDa	13
101	Filaggrin OS=Homo sapiens GN=FLG PE=1 SV=3	25	0.0836009		P20930	435 kDa	22
102	Hemoglobin subunit beta OS=Homo sapiens GN=HBB PE=1 SV=2	25	0.0836009		P68871	16 kDa	10
103	Protein IGHV3-74 (Fragment) OS=Homo sapiens GN=IGHV3-74 PE=1 SV=1	25	0.0836009		A0A0B4J1X5	13 kDa	3
104	Alpha-2-HS-glycoprotein OS=Homo sapiens GN=AHSG PE=1 SV=1	24	0.0802568		P02765	39 kDa	8
105	Secreted phosphoprotein 24 OS=Homo sapiens GN=SPP2 PE=1 SV=1	24	0.0802568		Q13103	24 kDa	6
106	Dermcidin OS=Homo sapiens GN=DCD PE=1 SV=2	23	0.0769128		P81605	11 kDa	5
107	Filaggrin-2 OS=Homo sapiens GN=FLG2 PE=1 SV=1	23	0.0769128		Q5D862	248 kDa	14
108	Ficolin-3 OS=Homo sapiens GN=FCN3 PE=1 SV=2	21	0.0702247		O75636	33 kDa	9
109	Junction plakoglobin OS=Homo sapiens GN=JUP PE=1 SV=3	21	0.0702247		P14923	82 kDa	13
110	Lactotransferrin (Fragment) OS=Homo sapiens GN=LTF PE=1 SV=1	21	0.0702247		E7EQB2 (+2)	77 kDa	18
111	Actin, cytoplasmic 1 OS=Homo sapiens GN=ACTB PE=1 SV=1	20	0.0668807		P60709 (+1)	42 kDa	6
112	Pigment epithelium-derived factor OS=Homo sapiens GN=SERPINF1 PE=1 SV=4	20	0.0668807		P36955	46 kDa	9
113	Caspase-14 OS=Homo sapiens GN=CASP14 PE=1 SV=2	19	0.0635367		P31944	28 kDa	8
114	Kallistatin OS=Homo sapiens GN=SERPINA4 PE=1 SV=3	19	0.0635367		P29622	49 kDa	12
115	Protein S100-A8 OS=Homo sapiens GN=S100A8 PE=1 SV=1	19	0.0635367		P05109	11 kDa	4
116	Complement factor I OS=Homo sapiens GN=CFI PE=1 SV=1	18	0.0601926		E7ETH0 (+2)	67 kDa	7
117	Fibrinogen gamma chain OS=Homo sapiens GN=FGG PE=1 SV=3	18	0.0601926		P02679 (+3)	52 kDa	8
118	Transforming growth factor-beta-induced protein ig-h3 OS=Homo sapiens GN=TGFBI PE=1 SV=1	17	0.0568486		Q15582	75 kDa	14
119	Cartilage acidic protein 1 OS=Homo sapiens GN=CRTAC1 PE=1 SV=1	16	0.0535045		A0A0C4DFP6 (+1)	70 kDa	11
120	Apolipoprotein C-IV OS=Homo sapiens GN=APOC4 PE=1 SV=1	15	0.0501605		P55056	15 kDa	6
121	Insulin-like growth factor-binding protein 2 OS=Homo sapiens GN=IGFBP2 PE=1 SV=2	15	0.0501605		P18065	35 kDa	7
122	Angiopoietin-related protein 3 OS=Homo sapiens GN=ANGPTL3 PE=1 SV=1	14	0.0468165		Q9Y5C1	54 kDa	7
123	Complement component C7 OS=Homo sapiens GN=C7 PE=1 SV=2	14	0.0468165		P10643	94 kDa	12
124	Lipopolysaccharide-binding protein OS=Homo sapiens GN=LBP PE=1 SV=3	14	0.0468165		P18428	53 kDa	9
125	Adipocyte plasma membrane-associated protein (Fragment) OS=Homo sapiens GN=APMAP PE=1 SV=1	13	0.0434724		H0Y512	45 kDa	6
126	Coagulation factor VII OS=Homo sapiens GN=F7 PE=1 SV=2	12	0.0401284		F5H8B0 (+2)	42 kDa	5
127	Protein IGHV5-51 (Fragment) OS=Homo sapiens GN=IGHV5-51 PE=1 SV=1	12	0.0401284		A0A0C4DH38	13 kDa	3
128	Thrombospondin-1 OS=Homo sapiens GN=THBS1 PE=1 SV=2	12	0.0401284		P07996	129 kDa	8
129	Cathelicidin antimicrobial peptide OS=Homo sapiens GN=CAMP PE=1 SV=1	11	0.0367844		J3KNB4 (+1)	20 kDa	8
130	Complement factor D OS=Homo sapiens GN=CFD PE=1 SV=1	11	0.0367844		K7ERG9	28 kDa	7
131	Glutathione peroxidase OS=Homo sapiens GN=GPX3 PE=1 SV=1	11	0.0367844		A0A087X1J7 (+1)	25 kDa	6
132	Lysozyme C OS=Homo sapiens GN=LYZ PE=1 SV=1	11	0.0367844		P61626	17 kDa	7
133	Alpha-1-acid glycoprotein 2 OS=Homo sapiens GN=ORM2 PE=1 SV=2	10	0.0334403		P19652	24 kDa	4
134	Alpha-1-antichymotrypsin OS=Homo sapiens GN=SERPINA3 PE=1 SV=2	10	0.0334403		P01011	48 kDa	5
135	Glyceraldehyde-3-phosphate dehydrogenase OS=Homo sapiens GN=GAPDH PE=1 SV=3	10	0.0334403		P04406	36 kDa	4
136	Hepatocyte growth factor-like protein OS=Homo sapiens GN=MST1 PE=1 SV=1	10	0.0334403		G3XAK1 (+1)	82 kDa	6
137	Multiple inositol polyphosphate phosphatase 1 OS=Homo sapiens GN=MINPP1 PE=1 SV=1	10	0.0334403		Q9UNW1	55 kDa	8
138	Protein IGLV3-19 (Fragment) OS=Homo sapiens GN=IGLV3-19 PE=1 SV=1	10	0.0334403		A0A075B6J8	12 kDa	4
139	Fibrinogen alpha chain OS=Homo sapiens GN=FGA PE=1 SV=2	9	0.0300963		P02671 (+1)	95 kDa	5
140	Hemoglobin subunit alpha OS=Homo sapiens GN=HBA1 PE=1 SV=2	9	0.0300963		P69905	15 kDa	5
141	Ig lambda chain V-I region WAH OS=Homo sapiens PE=1 SV=1	9	0.0300963		P04208	12 kDa	3
142	Protein S100-A9 OS=Homo sapiens GN=S100A9 PE=1 SV=1	9	0.0300963		P06702	13 kDa	4
143	Apolipoprotein A-V OS=Homo sapiens GN=APOA5 PE=1 SV=1	8	0.0267523		Q6Q788	41 kDa	4
144	Cystatin-A OS=Homo sapiens GN=CSTA PE=1 SV=1	8	0.0267523		P01040	11 kDa	3
145	Desmoglein-1 OS=Homo sapiens GN=DSG1 PE=1 SV=2	8	0.0267523		Q02413	114 kDa	5
146	Ig kappa chain V-IV region JI OS=Homo sapiens PE=4 SV=1	8	0.0267523		P06313	15 kDa	4
147	Isoform 2 of Annexin A2 OS=Homo sapiens GN=ANXA2	8	0.0267523		P07355-2	40 kDa	4
148	Protein IGLV3-25 (Fragment) OS=Homo sapiens GN=IGLV3-25 PE=1 SV=2	8	0.0267523		A0A075B6J4	12 kDa	3
149	Protein-glutamine gamma-glutamyltransferase E OS=Homo sapiens GN=TGM3 PE=1 SV=4	8	0.0267523		Q08188	77 kDa	5
150	Fibulin-1 OS=Homo sapiens GN=FBLN1 PE=1 SV=1	7	0.0234082		B1AHL2 (+1)	78 kDa	6
151	Fructose-bisphosphate aldolase OS=Homo sapiens GN=ALDOA PE=1 SV=1	7	0.0234082		J3KPS3 (+2)	40 kDa	4
152	Insulin-like growth factor-binding protein 7 OS=Homo sapiens GN=IGFBP7 PE=1 SV=1	7	0.0234082		Q16270 (+1)	29 kDa	5
153	Isoform 2 of Apolipoprotein M OS=Homo sapiens GN=APOM	7	0.0234082		O95445-2	13 kDa	6
154	Isoform 3 of Collagen alpha-1(XVIII) chain OS=Homo sapiens GN=COL18A1	7	0.0234082		P39060-2	136 kDa	6
155	Isoform M1 of Pyruvate kinase PKM OS=Homo sapiens GN=PKM	7	0.0234082		P14618-2	58 kDa	6
156	Protein APOC4-APOC2 OS=Homo sapiens GN=APOC4-APOC2 PE=4 SV=1	7	0.0234082		K7ER74	20 kDa	2
157	Protein IGHV3-49 OS=Homo sapiens GN=IGHV3-49 PE=1 SV=1	7	0.0234082		A0A087WU91 (+1)	12 kDa	3
158	Protein IGHV4-34 (Fragment) OS=Homo sapiens GN=IGHV4-34 PE=1 SV=1	7	0.0234082		A0A0A0MS12	14 kDa	3
159	Retinoic acid receptor responder protein 2 OS=Homo sapiens GN=RARRES2 PE=1 SV=1	7	0.0234082		Q99969	19 kDa	4
160	Vitamin D-binding protein OS=Homo sapiens GN=GC PE=1 SV=1	7	0.0234082		D6RF35	53 kDa	5
161	Calmodulin-like protein 5 OS=Homo sapiens GN=CALML5 PE=1 SV=2	6	0.0200642		Q9NZT1	16 kDa	4
162	Desmocollin-1 OS=Homo sapiens GN=DSC1 PE=1 SV=2	6	0.0200642		Q08554	100 kDa	5
163	Ig kappa chain V-II region TEW OS=Homo sapiens PE=1 SV=1	6	0.0200642		P01617	12 kDa	2
164	Isoform 2 of Alcohol dehydrogenase 4 OS=Homo sapiens GN=ADH4	6	0.0200642		P08319-2	43 kDa	3
165	Keratinocyte proline-rich protein OS=Homo sapiens GN=KPRP PE=1 SV=1	6	0.0200642		Q5T749	64 kDa	6
166	Nicotinate phosphoribosyltransferase (Fragment) OS=Homo sapiens GN=NAPRT PE=1 SV=1	6	0.0200642		H0YDA6	14 kDa	2
167	Protein JCHAIN (Fragment) OS=Homo sapiens GN=JCHAIN PE=1 SV=5	6	0.0200642		D6RD17 (+1)	18 kDa	4
168	Angiotensinogen OS=Homo sapiens GN=AGT PE=1 SV=1	5	0.0167202		P01019	53 kDa	5
169	Carboxypeptidase N subunit 2 OS=Homo sapiens GN=CPN2 PE=1 SV=3	5	0.0167202		P22792	61 kDa	4
170	Creatine kinase M-type OS=Homo sapiens GN=CKM PE=1 SV=2	5	0.0167202		P06732	43 kDa	5
171	Flavin reductase (NADPH) OS=Homo sapiens GN=BLVRB PE=1 SV=3	5	0.0167202		P30043	22 kDa	4
172	Hemopexin OS=Homo sapiens GN=HPX PE=1 SV=2	5	0.0167202		P02790	52 kDa	3
173	Prenylcysteine oxidase 1 OS=Homo sapiens GN=PCYOX1 PE=1 SV=3	5	0.0167202		Q9UHG3	57 kDa	4
174	Protein IGLV3-21 (Fragment) OS=Homo sapiens GN=IGLV3-21 PE=1 SV=1	5	0.0167202		A0A075B6J7	12 kDa	2
175	Angiogenin OS=Homo sapiens GN=ANG PE=1 SV=1	4	0.0133761		P03950	17 kDa	2
176	C-reactive protein OS=Homo sapiens GN=CRP PE=1 SV=1	4	0.0133761		P02741	25 kDa	3
177	Ig kappa chain V-III region B6 OS=Homo sapiens PE=1 SV=1	4	0.0133761		P01619	12 kDa	2
178	Insulin-like growth factor-binding protein 4 OS=Homo sapiens GN=IGFBP4 PE=1 SV=2	4	0.0133761		P22692	28 kDa	2
179	Inter-alpha-trypsin inhibitor heavy chain H3 OS=Homo sapiens GN=ITIH3 PE=1 SV=2	4	0.0133761		Q06033	100 kDa	3
180	Isoform 2 of Serpin B12 OS=Homo sapiens GN=SERPINB12	4	0.0133761		Q96P63-2	48 kDa	2
181	L-lactate dehydrogenase A chain OS=Homo sapiens GN=LDHA PE=1 SV=2	4	0.0133761		P00338 (+1)	37 kDa	4
182	Peroxiredoxin-2 OS=Homo sapiens GN=PRDX2 PE=1 SV=5	4	0.0133761		P32119	22 kDa	2
183	Phosphatidylinositol-glycan-specific phospholipase D OS=Homo sapiens GN=GPLD1 PE=1 SV=3	4	0.0133761		P80108	92 kDa	3
184	Platelet factor 4 OS=Homo sapiens GN=PF4 PE=1 SV=2	4	0.0133761		P02776	11 kDa	3
185	Protein S100-A7 OS=Homo sapiens GN=S100A7 PE=1 SV=4	4	0.0133761		P31151	11 kDa	3
186	Cadherin-1 OS=Homo sapiens GN=CDH1 PE=1 SV=1	3	0.0100321		H3BNC6	59 kDa	3
187	Chondroadherin OS=Homo sapiens GN=CHAD PE=2 SV=2	3	0.0100321		O15335	40 kDa	3
188	Cornifin-A OS=Homo sapiens GN=SPRR1A PE=1 SV=2	3	0.0100321		P35321	10 kDa	2
189	Endoplasmin OS=Homo sapiens GN=HSP90B1 PE=1 SV=1	3	0.0100321		P14625	92 kDa	3
190	Galectin-7 OS=Homo sapiens GN=LGALS7 PE=1 SV=2	3	0.0100321		P47929	15 kDa	2
191	Peroxiredoxin-1 (Fragment) OS=Homo sapiens GN=PRDX1 PE=1 SV=1	3	0.0100321		A0A0A0MSI0 (+1)	19 kDa	2
192	Plectin OS=Homo sapiens GN=PLEC PE=1 SV=3	3	0.0100321		Q15149	532 kDa	3
193	Suprabasin OS=Homo sapiens GN=SBSN PE=1 SV=2	3	0.0100321		Q6UWP8	61 kDa	3
194	Calsyntenin-1 OS=Homo sapiens GN=CLSTN1 PE=1 SV=1	2	0.00668807		O94985 (+1)	110 kDa	2
195	Cathepsin S OS=Homo sapiens GN=CTSS PE=1 SV=3	2	0.00668807		P25774	37 kDa	2
196	Fatty acid-binding protein, epidermal OS=Homo sapiens GN=FABP5 PE=1 SV=3	2	0.00668807		Q01469	15 kDa	2
197	Ficolin-1 OS=Homo sapiens GN=FCN1 PE=1 SV=2	2	0.00668807		O00602	35 kDa	2
198	IgGFc-binding protein OS=Homo sapiens GN=FCGBP PE=1 SV=1	2	0.00668807		A0A087WXI2 (+1)	445 kDa	2
199	Small proline-rich protein 2D OS=Homo sapiens GN=SPRR2D PE=2 SV=2	2	0.00668807		P22532	8 kDa	2
		29904	100
