# Supplementary material for: Methods of protein corona isolation for magnetic nanoparticles
Source: Royal Society of Chemistry journal article supplement (doi:10.1039/c7an00646b), 2017-01-01
Supplement: c7an00646b3.xlsx [file c7an00646b3.xlsx]

## Sheet: B1400 undiluted
Number	Identified Proteins	Spectrum Count B1400 undiluted	Relative abundance (%)	Sum	Accession Number	Molecular Weight	Peptide count
1	Apolipoprotein B-100 OS=Homo sapiens GN=APOB PE=1 SV=2	1643	9.77453		P04114	516 kDa	250
2	Complement C3 OS=Homo sapiens GN=C3 PE=1 SV=2	1090	6.48462	16809	P01024	187 kDa	131
3	Serum albumin OS=Homo sapiens GN=ALB PE=1 SV=2	604	3.59331		P02768	69 kDa	73
4	Complement C4-A OS=Homo sapiens GN=C4A PE=1 SV=2	587	3.49218		P0C0L4	193 kDa	5
5	Complement C4-B OS=Homo sapiens GN=C4B PE=1 SV=2	586	3.48623		P0C0L5	193 kDa	106
6	Complement factor H OS=Homo sapiens GN=CFH PE=1 SV=4	554	3.29585		P08603	139 kDa	83
7	Plasminogen OS=Homo sapiens GN=PLG PE=1 SV=2	521	3.09953		P00747	91 kDa	101
8	Alpha-2-macroglobulin OS=Homo sapiens GN=A2M PE=1 SV=3	464	2.76043		P01023	163 kDa	68
9	Prothrombin OS=Homo sapiens GN=F2 PE=1 SV=2	438	2.60575		P00734	70 kDa	57
10	Antithrombin-III OS=Homo sapiens GN=SERPINC1 PE=1 SV=1	417	2.48081		P01008	53 kDa	42
11	C4b-binding protein alpha chain OS=Homo sapiens GN=C4BPA PE=1 SV=2	380	2.26069		P04003	67 kDa	48
12	Apolipoprotein A-I OS=Homo sapiens GN=APOA1 PE=1 SV=1	289	1.71932		P02647	31 kDa	47
13	Histidine-rich glycoprotein OS=Homo sapiens GN=HRG PE=1 SV=1	281	1.67172		P04196	60 kDa	52
14	Coagulation factor V OS=Homo sapiens GN=F5 PE=1 SV=1	255	1.51704		A0A0A0MRJ7 (+1)	252 kDa	56
15	Kininogen-1 OS=Homo sapiens GN=KNG1 PE=1 SV=2	241	1.43376		P01042	72 kDa	49
16	Isoform LMW of Kininogen-1 OS=Homo sapiens GN=KNG1	235	1.39806		P01042-2	48 kDa	2
17	Coagulation factor XII OS=Homo sapiens GN=F12 PE=1 SV=3	223	1.32667		P00748	68 kDa	52
18	Vitronectin OS=Homo sapiens GN=VTN PE=1 SV=1	216	1.28503		P04004	54 kDa	47
19	Apolipoprotein E OS=Homo sapiens GN=APOE PE=1 SV=1	207	1.23148		P02649	36 kDa	31
20	Plasma kallikrein (Fragment) OS=Homo sapiens GN=KLKB1 PE=1 SV=1	202	1.20174		H0YAC1	77 kDa	41
21	Plasma protease C1 inhibitor OS=Homo sapiens GN=SERPING1 PE=1 SV=2	201	1.19579		P05155 (+1)	55 kDa	26
22	Uncharacterized protein OS=Homo sapiens PE=1 SV=1	194	1.15414		B4E1Z4	141 kDa	39
23	Inter-alpha-trypsin inhibitor heavy chain H2 OS=Homo sapiens GN=ITIH2 PE=1 SV=1	192	1.14225		Q5T985	105 kDa	30
24	Gelsolin OS=Homo sapiens GN=GSN PE=1 SV=1	178	1.05896		P06396	86 kDa	38
25	Inter-alpha-trypsin inhibitor heavy chain H1 OS=Homo sapiens GN=ITIH1 PE=1 SV=3	169	1.00541		P19827	101 kDa	33
26	Ig mu chain C region OS=Homo sapiens GN=IGHM PE=1 SV=1	150	0.892379		A0A087X2C0	64 kDa	22
27	Complement C5 OS=Homo sapiens GN=C5 PE=1 SV=4	149	0.88643		P01031	188 kDa	54
28	Ig gamma-1 chain C region OS=Homo sapiens GN=IGHG1 PE=1 SV=1	149	0.88643		A0A087WV47	51 kDa	22
29	Ig mu chain C region OS=Homo sapiens GN=IGHM PE=1 SV=1	140	0.832887		A0A087WYJ9	66 kDa	2
30	Ig gamma-1 chain C region OS=Homo sapiens GN=IGHG1 PE=1 SV=1	131	0.779344		A0A087WYC5	52 kDa	2
31	Coagulation factor XI OS=Homo sapiens GN=F11 PE=1 SV=1	128	0.761497		P03951	70 kDa	28
32	Complement C1r subcomponent OS=Homo sapiens GN=C1R PE=1 SV=1	124	0.7377		B4DPQ0	82 kDa	32
33	Ig gamma-3 chain C region OS=Homo sapiens GN=IGHG3 PE=1 SV=1	118	0.702005		A0A087WXL8	57 kDa	9
34	Protein IGKV3-11 OS=Homo sapiens GN=IGKV3-11 PE=4 SV=1	117	0.696056		A0A087WZW8	26 kDa	30
35	Carboxypeptidase B2 OS=Homo sapiens GN=CPB2 PE=1 SV=2	115	0.684157		Q96IY4	48 kDa	20
36	Complement C1s subcomponent OS=Homo sapiens GN=C1S PE=1 SV=1	115	0.684157		P09871	77 kDa	25
37	Ig kappa chain C region OS=Homo sapiens GN=IGKC PE=1 SV=1	115	0.684157		A0A087X130	25 kDa	3
38	Ig kappa chain C region OS=Homo sapiens GN=IGKC PE=1 SV=1	115	0.684157		A0A087WTX5	26 kDa	2
39	Ig kappa chain C region OS=Homo sapiens GN=IGKC PE=1 SV=1	113	0.672259		A0A087WYL9	26 kDa	3
40	Alpha-1-antitrypsin OS=Homo sapiens GN=SERPINA1 PE=1 SV=3	107	0.636564		P01009	47 kDa	24
41	Ig gamma-2 chain C region OS=Homo sapiens GN=IGHG2 PE=1 SV=2	100	0.594919		P01859	36 kDa	8
42	Heparin cofactor 2 OS=Homo sapiens GN=SERPIND1 PE=1 SV=3	87	0.51758		P05546	57 kDa	14
43	Serotransferrin OS=Homo sapiens GN=TF PE=1 SV=3	87	0.51758		P02787	77 kDa	33
44	Complement component C9 OS=Homo sapiens GN=C9 PE=1 SV=2	86	0.511631		P02748	63 kDa	26
45	Complement factor H-related protein 1 OS=Homo sapiens GN=CFHR1 PE=1 SV=2	84	0.499732		Q03591	38 kDa	7
46	Vitamin K-dependent protein S OS=Homo sapiens GN=PROS1 PE=1 SV=1	80	0.475936		P07225	75 kDa	22
47	Sulfhydryl oxidase 1 OS=Homo sapiens GN=QSOX1 PE=1 SV=3	77	0.458088		O00391	83 kDa	25
48	Beta-2-glycoprotein 1 OS=Homo sapiens GN=APOH PE=1 SV=3	76	0.452139		P02749	38 kDa	16
49	Complement component C6 OS=Homo sapiens GN=C6 PE=1 SV=3	76	0.452139		P13671	105 kDa	25
50	Ceruloplasmin OS=Homo sapiens GN=CP PE=1 SV=1	75	0.44619		P00450	122 kDa	26
51	Ig alpha-1 chain C region OS=Homo sapiens GN=IGHA1 PE=1 SV=2	74	0.44024		P01876	38 kDa	14
52	Isoform 2 of Apolipoprotein L1 OS=Homo sapiens GN=APOL1	73	0.434291		O14791-2	46 kDa	24
53	Complement C1q subcomponent subunit B OS=Homo sapiens GN=C1QB PE=1 SV=1	71	0.422393		D6R934 (+1)	26 kDa	9
54	Complement component C8 beta chain OS=Homo sapiens GN=C8B PE=1 SV=3	71	0.422393		P07358	67 kDa	27
55	Coagulation factor X OS=Homo sapiens GN=F10 PE=1 SV=2	69	0.410494		P00742	55 kDa	15
56	Apolipoprotein A-IV OS=Homo sapiens GN=APOA4 PE=1 SV=3	66	0.392647		P06727	45 kDa	23
57	Apolipoprotein(a) OS=Homo sapiens GN=LPA PE=1 SV=1	66	0.392647		P08519	501 kDa	22
58	Complement factor H-related protein 5 OS=Homo sapiens GN=CFHR5 PE=1 SV=1	66	0.392647		Q9BXR6	64 kDa	23
59	Hornerin OS=Homo sapiens GN=HRNR PE=1 SV=2	66	0.392647		Q86YZ3	282 kDa	20
60	Plasma serine protease inhibitor OS=Homo sapiens GN=SERPINA5 PE=1 SV=3	66	0.392647		P05154	46 kDa	15
61	Coagulation factor IX OS=Homo sapiens GN=F9 PE=1 SV=2	63	0.374799		P00740	52 kDa	15
62	Fibronectin OS=Homo sapiens GN=FN1 PE=1 SV=4	59	0.351002		P02751 (+5)	263 kDa	31
63	Ig lambda-3 chain C regions (Fragment) OS=Homo sapiens GN=IGLC3 PE=1 SV=2	59	0.351002		A0A075B6L0	11 kDa	2
64	Alpha-2-antiplasmin OS=Homo sapiens GN=SERPINF2 PE=1 SV=3	58	0.345053		P08697	55 kDa	13
65	Hyaluronan-binding protein 2 OS=Homo sapiens GN=HABP2 PE=1 SV=1	57	0.339104		Q14520	63 kDa	17
66	Insulin-like growth factor-binding protein complex acid labile subunit OS=Homo sapiens GN=IGFALS PE=1 SV=1	56	0.333155		P35858 (+1)	66 kDa	15
67	Ig alpha-2 chain C region OS=Homo sapiens GN=IGHA2 PE=1 SV=3	55	0.327206		P01877	37 kDa	4
68	78 kDa glucose-regulated protein OS=Homo sapiens GN=HSPA5 PE=1 SV=2	54	0.321256		P11021	72 kDa	22
69	Complement C1q subcomponent subunit C OS=Homo sapiens GN=C1QC PE=1 SV=3	53	0.315307		P02747	26 kDa	10
70	Pregnancy zone protein OS=Homo sapiens GN=PZP PE=1 SV=4	53	0.315307		P20742	164 kDa	3
71	Immunoglobulin lambda-like polypeptide 5 OS=Homo sapiens GN=IGLL5 PE=1 SV=1	52	0.309358		A0A087WWT5	25 kDa	2
72	Immunoglobulin lambda-like polypeptide 5 OS=Homo sapiens GN=IGLL5 PE=1 SV=1	50	0.29746		A0A087WYR4	25 kDa	12
73	Inter-alpha-trypsin inhibitor heavy chain H4 OS=Homo sapiens GN=ITIH4 PE=1 SV=4	48	0.285561		Q14624	103 kDa	17
74	Complement component C7 OS=Homo sapiens GN=C7 PE=1 SV=2	44	0.261765		P10643	94 kDa	27
75	Thrombospondin-1 OS=Homo sapiens GN=THBS1 PE=1 SV=2	44	0.261765		P07996	129 kDa	25
76	Protein SAA2-SAA4 OS=Homo sapiens GN=SAA2-SAA4 PE=4 SV=1	43	0.255815		A0A096LPE2	23 kDa	8
77	Isoform 2 of Clusterin OS=Homo sapiens GN=CLU	42	0.249866		P10909-2	58 kDa	15
78	Properdin OS=Homo sapiens GN=CFP PE=1 SV=2	42	0.249866		P27918	51 kDa	12
79	Complement component C8 alpha chain OS=Homo sapiens GN=C8A PE=1 SV=2	40	0.237968		P07357	65 kDa	18
80	Complement factor H-related protein 2 OS=Homo sapiens GN=CFHR2 PE=1 SV=1	38	0.226069		P36980 (+1)	31 kDa	3
81	Isoform F of Proteoglycan 4 OS=Homo sapiens GN=PRG4	38	0.226069		Q92954-6	146 kDa	14
82	Selenoprotein P OS=Homo sapiens GN=SEPP1 PE=1 SV=3	37	0.22012		P49908	43 kDa	10
83	Fibrinogen gamma chain OS=Homo sapiens GN=FGG PE=1 SV=3	36	0.214171		P02679 (+1)	52 kDa	14
84	Haptoglobin-related protein OS=Homo sapiens GN=HPR PE=2 SV=2	35	0.208222		P00739 (+1)	39 kDa	16
85	Ig alpha-2 chain C region (Fragment) OS=Homo sapiens GN=IGHA2 PE=1 SV=1	35	0.208222		A0A075B6N7	37 kDa	2
86	Mannan-binding lectin serine protease 1 OS=Homo sapiens GN=MASP1 PE=1 SV=3	35	0.208222		P48740	79 kDa	14
87	Isoform 2 of Insulin-like growth factor-binding protein 3 OS=Homo sapiens GN=IGFBP3	34	0.202273		P17936-2	32 kDa	14
88	Hepatocyte growth factor activator OS=Homo sapiens GN=HGFAC PE=1 SV=1	33	0.196323		D6RAR4 (+1)	71 kDa	10
89	Lactotransferrin (Fragment) OS=Homo sapiens GN=LTF PE=1 SV=1	33	0.196323		E7EQB2	77 kDa	30
90	Carboxypeptidase N catalytic chain OS=Homo sapiens GN=CPN1 PE=1 SV=1	32	0.190374		P15169	52 kDa	12
91	Complement factor H-related protein 3 OS=Homo sapiens GN=CFHR3 PE=1 SV=2	31	0.184425		Q02985	37 kDa	7
92	Haptoglobin OS=Homo sapiens GN=HP PE=1 SV=4	31	0.184425		H0Y300	49 kDa	8
93	Isoform 2 of Mannan-binding lectin serine protease 1 OS=Homo sapiens GN=MASP1	30	0.178476		P48740-2	82 kDa	3
94	Protein Z-dependent protease inhibitor OS=Homo sapiens GN=SERPINA10 PE=1 SV=1	30	0.178476		G3V2W1 (+1)	55 kDa	9
95	Transthyretin OS=Homo sapiens GN=TTR PE=1 SV=1	30	0.178476		A0A087WV45	15 kDa	7
96	CD5 antigen-like OS=Homo sapiens GN=CD5L PE=1 SV=1	28	0.166577		O43866	38 kDa	13
97	Hepatocyte growth factor-like protein OS=Homo sapiens GN=MST1 PE=1 SV=1	28	0.166577		G3XAK1 (+1)	82 kDa	15
98	Protein AMBP OS=Homo sapiens GN=AMBP PE=1 SV=1	28	0.166577		P02760	39 kDa	10
99	Vitamin K-dependent protein C OS=Homo sapiens GN=PROC PE=1 SV=1	28	0.166577		E7END6 (+2)	55 kDa	12
100	Complement factor D OS=Homo sapiens GN=CFD PE=1 SV=1	27	0.160628		K7ERG9 (+1)	28 kDa	11
101	Protein IGHV3-74 (Fragment) OS=Homo sapiens GN=IGHV3-74 PE=1 SV=1	26	0.154679		A0A0B4J1X5	13 kDa	2
102	Cartilage acidic protein 1 OS=Homo sapiens GN=CRTAC1 PE=1 SV=1	25	0.14873		A0A0C4DFP6 (+2)	70 kDa	14
103	Apolipoprotein C-I (Fragment) OS=Homo sapiens GN=APOC1 PE=1 SV=1	24	0.142781		K7ERI9 (+1)	9 kDa	9
104	Complement component C8 gamma chain OS=Homo sapiens GN=C8G PE=1 SV=3	24	0.142781		P07360	22 kDa	10
105	Ig kappa chain V-III region HAH OS=Homo sapiens PE=2 SV=1	23	0.136831		P18135	14 kDa	6
106	Desmoplakin OS=Homo sapiens GN=DSP PE=1 SV=3	22	0.130882		P15924	332 kDa	12
107	Isoform B of Coagulation factor VII OS=Homo sapiens GN=F7	22	0.130882		P08709-2	49 kDa	6
108	Kallistatin OS=Homo sapiens GN=SERPINA4 PE=1 SV=3	22	0.130882		P29622	49 kDa	14
109	Tetranectin OS=Homo sapiens GN=CLEC3B PE=1 SV=1	22	0.130882		E9PHK0	18 kDa	10
110	Alpha-2-HS-glycoprotein OS=Homo sapiens GN=AHSG PE=1 SV=1	21	0.124933		P02765	39 kDa	7
111	Ig delta chain C region (Fragment) OS=Homo sapiens GN=IGHD PE=1 SV=1	21	0.124933		A0A0A0MS09	48 kDa	9
112	Procollagen C-endopeptidase enhancer 1 OS=Homo sapiens GN=PCOLCE PE=1 SV=2	21	0.124933		Q15113	48 kDa	13
113	Protein IGHV3-72 OS=Homo sapiens GN=IGHV3-72 PE=1 SV=1	21	0.124933		A0A087WW89	11 kDa	3
114	Apolipoprotein D (Fragment) OS=Homo sapiens GN=APOD PE=1 SV=1	20	0.118984		C9JF17 (+1)	24 kDa	7
115	Complement C1q subcomponent subunit A OS=Homo sapiens GN=C1QA PE=1 SV=2	19	0.113035		P02745	26 kDa	9
116	Fibulin-1 OS=Homo sapiens GN=FBLN1 PE=1 SV=1	19	0.113035		B1AHL2	78 kDa	2
117	Isoform 2 of N-acetylmuramoyl-L-alanine amidase OS=Homo sapiens GN=PGLYRP2	19	0.113035		Q96PD5-2	68 kDa	9
118	Serum amyloid P-component OS=Homo sapiens GN=APCS PE=1 SV=2	19	0.113035		P02743	25 kDa	7
119	Trypsin-1 OS=Homo sapiens GN=PRSS1 PE=1 SV=1	19	0.113035		P07477	27 kDa	3
120	Fibrinogen beta chain OS=Homo sapiens GN=FGB PE=1 SV=2	18	0.107085		P02675	56 kDa	10
121	Fibulin-1 OS=Homo sapiens GN=FBLN1 PE=1 SV=4	18	0.107085		P23142	77 kDa	10
122	Complement factor I OS=Homo sapiens GN=CFI PE=1 SV=1	17	0.101136		E7ETH0	67 kDa	11
123	Serum paraoxonase/arylesterase 1 OS=Homo sapiens GN=PON1 PE=1 SV=3	17	0.101136		P27169	40 kDa	10
124	Transforming growth factor-beta-induced protein ig-h3 OS=Homo sapiens GN=TGFBI PE=1 SV=1	17	0.101136		Q15582	75 kDa	16
125	Actin, cytoplasmic 1 OS=Homo sapiens GN=ACTB PE=1 SV=1	16	0.0951871		P60709 (+1)	42 kDa	3
126	Apolipoprotein A-II OS=Homo sapiens GN=APOA2 PE=1 SV=1	16	0.0951871		V9GYM3	15 kDa	4
127	Inter-alpha-trypsin inhibitor heavy chain H3 OS=Homo sapiens GN=ITIH3 PE=1 SV=2	16	0.0951871		Q06033 (+1)	100 kDa	13
128	Dermcidin OS=Homo sapiens GN=DCD PE=1 SV=2	15	0.0892379		P81605	11 kDa	3
129	Desmoglein-1 OS=Homo sapiens GN=DSG1 PE=1 SV=2	15	0.0892379		Q02413	114 kDa	7
130	Lipopolysaccharide-binding protein OS=Homo sapiens GN=LBP PE=1 SV=3	15	0.0892379		P18428	53 kDa	7
131	Vitamin D-binding protein OS=Homo sapiens GN=GC PE=1 SV=1	15	0.0892379		P02774 (+1)	53 kDa	9
132	Amyloid beta A4 protein OS=Homo sapiens GN=APP PE=1 SV=1	14	0.0832887		A0A0A0MRG2 (+2)	75 kDa	2
133	Hemoglobin subunit beta OS=Homo sapiens GN=HBB PE=1 SV=2	14	0.0832887		P68871	16 kDa	9
134	Ig kappa chain V-I region Scw OS=Homo sapiens PE=1 SV=1	14	0.0832887		P01609	12 kDa	2
135	Keratinocyte proline-rich protein OS=Homo sapiens GN=KPRP PE=1 SV=1	14	0.0832887		Q5T749	64 kDa	9
136	Fibrinogen alpha chain OS=Homo sapiens GN=FGA PE=1 SV=2	13	0.0773395		P02671	95 kDa	5
137	Hemopexin OS=Homo sapiens GN=HPX PE=1 SV=2	13	0.0773395		P02790	52 kDa	6
138	Insulin-like growth factor-binding protein 2 OS=Homo sapiens GN=IGFBP2 PE=1 SV=2	13	0.0773395		P18065	35 kDa	6
139	Junction plakoglobin OS=Homo sapiens GN=JUP PE=1 SV=3	13	0.0773395		P14923	82 kDa	8
140	Angiopoietin-related protein 3 OS=Homo sapiens GN=ANGPTL3 PE=1 SV=1	12	0.0713903		Q9Y5C1	54 kDa	7
141	Protein S100-A8 OS=Homo sapiens GN=S100A8 PE=1 SV=1	12	0.0713903		P05109	11 kDa	3
142	Secreted phosphoprotein 24 OS=Homo sapiens GN=SPP2 PE=1 SV=1	12	0.0713903		Q13103	24 kDa	7
143	Carboxypeptidase N subunit 2 OS=Homo sapiens GN=CPN2 PE=1 SV=3	11	0.0654411		P22792	61 kDa	9
144	Complement C1r subcomponent-like protein OS=Homo sapiens GN=C1RL PE=1 SV=2	11	0.0654411		Q9NZP8	53 kDa	2
145	Endoplasmin OS=Homo sapiens GN=HSP90B1 PE=1 SV=1	11	0.0654411		P14625	92 kDa	8
146	Heat shock cognate 71 kDa protein OS=Homo sapiens GN=HSPA8 PE=1 SV=1	11	0.0654411		E9PKE3 (+1)	69 kDa	4
147	Ig heavy chain V-III region BUT OS=Homo sapiens PE=1 SV=1	11	0.0654411		P01767	12 kDa	2
148	Isoform 2 of C4b-binding protein beta chain OS=Homo sapiens GN=C4BPB	11	0.0654411		P20851-2	28 kDa	8
149	Isoform 2 of Calsyntenin-1 OS=Homo sapiens GN=CLSTN1	11	0.0654411		O94985-2	109 kDa	8
150	Protein IGHV5-51 (Fragment) OS=Homo sapiens GN=IGHV5-51 PE=1 SV=1	11	0.0654411		A0A0C4DH38	13 kDa	3
151	Alpha-1-antichymotrypsin OS=Homo sapiens GN=SERPINA3 PE=1 SV=2	10	0.0594919		P01011	48 kDa	6
152	Alpha-enolase OS=Homo sapiens GN=ENO1 PE=1 SV=2	10	0.0594919		P06733	47 kDa	8
153	Ig heavy chain V-III region WEA OS=Homo sapiens PE=1 SV=1	10	0.0594919		P01763	12 kDa	2
154	Isoform 2 of Ficolin-3 OS=Homo sapiens GN=FCN3	10	0.0594919		O75636-2	32 kDa	7
155	Pigment epithelium-derived factor OS=Homo sapiens GN=SERPINF1 PE=1 SV=4	10	0.0594919		P36955	46 kDa	8
156	Protein IGHV3-30 (Fragment) OS=Homo sapiens GN=IGHV3-30 PE=1 SV=1	10	0.0594919		A0A0B4J2B7	13 kDa	2
157	Actin, aortic smooth muscle OS=Homo sapiens GN=ACTA2 PE=1 SV=1	9	0.0535427		P62736 (+1)	42 kDa	4
158	Apolipoprotein M OS=Homo sapiens GN=APOM PE=1 SV=2	9	0.0535427		O95445	21 kDa	6
159	Ig kappa chain V-IV region Len OS=Homo sapiens PE=1 SV=2	9	0.0535427		P01625	13 kDa	4
160	Multiple inositol polyphosphate phosphatase 1 OS=Homo sapiens GN=MINPP1 PE=1 SV=1	9	0.0535427		Q9UNW1	55 kDa	7
161	Pyruvate kinase PKM OS=Homo sapiens GN=PKM PE=1 SV=4	9	0.0535427		P14618	58 kDa	6
162	Alpha-synuclein OS=Homo sapiens GN=SNCA PE=1 SV=1	8	0.0475936		E7EPV7 (+2)	12 kDa	3
163	Filaggrin OS=Homo sapiens GN=FLG PE=1 SV=3	8	0.0475936		P20930	435 kDa	3
164	Filamin-A OS=Homo sapiens GN=FLNA PE=1 SV=4	8	0.0475936		P21333 (+2)	281 kDa	5
165	Glyceraldehyde-3-phosphate dehydrogenase OS=Homo sapiens GN=GAPDH PE=1 SV=3	8	0.0475936		P04406	36 kDa	4
166	Hemoglobin subunit alpha OS=Homo sapiens GN=HBA1 PE=1 SV=2	8	0.0475936		P69905	15 kDa	6
167	Ig kappa chain V-III region B6 OS=Homo sapiens PE=1 SV=1	8	0.0475936		P01619	12 kDa	3
168	Ig lambda chain V-III region SH OS=Homo sapiens PE=1 SV=1	8	0.0475936		P01714	11 kDa	3
169	IgGFc-binding protein OS=Homo sapiens GN=FCGBP PE=1 SV=1	8	0.0475936		A0A087WXI2 (+1)	445 kDa	7
170	Isoform 3 of Collagen alpha-1(XVIII) chain OS=Homo sapiens GN=COL18A1	8	0.0475936		P39060-2	136 kDa	8
171	Isoform 3 of L-lactate dehydrogenase A chain OS=Homo sapiens GN=LDHA	8	0.0475936		P00338-3	40 kDa	5
172	Prenylcysteine oxidase 1 OS=Homo sapiens GN=PCYOX1 PE=1 SV=3	8	0.0475936		Q9UHG3	57 kDa	7
173	Protein S100-A7 OS=Homo sapiens GN=S100A7 PE=1 SV=4	8	0.0475936		P31151	11 kDa	3
174	Afamin OS=Homo sapiens GN=AFM PE=1 SV=1	7	0.0416444		P43652	69 kDa	5
175	Angiogenin OS=Homo sapiens GN=ANG PE=1 SV=1	7	0.0416444		P03950	17 kDa	5
176	Angiotensinogen OS=Homo sapiens GN=AGT PE=1 SV=1	7	0.0416444		P01019	53 kDa	6
177	B-cell receptor CD22 OS=Homo sapiens GN=CD22 PE=1 SV=2	7	0.0416444		P20273 (+1)	95 kDa	2
178	Cartilage oligomeric matrix protein OS=Homo sapiens GN=COMP PE=1 SV=1	7	0.0416444		G3XAP6 (+1)	80 kDa	7
179	Cathepsin S OS=Homo sapiens GN=CTSS PE=1 SV=3	7	0.0416444		P25774	37 kDa	7
180	Filaggrin-2 OS=Homo sapiens GN=FLG2 PE=1 SV=1	7	0.0416444		Q5D862	248 kDa	3
181	Fructose-bisphosphate aldolase OS=Homo sapiens GN=ALDOA PE=1 SV=1	7	0.0416444		J3KPS3 (+1)	40 kDa	7
182	Phosphatidylinositol-glycan-specific phospholipase D OS=Homo sapiens GN=GPLD1 PE=1 SV=3	7	0.0416444		P80108	92 kDa	7
183	Phospholipid transfer protein OS=Homo sapiens GN=PLTP PE=1 SV=1	7	0.0416444		P55058	55 kDa	4
184	Protein IGLV1-47 (Fragment) OS=Homo sapiens GN=IGLV1-47 PE=1 SV=1	7	0.0416444		A0A075B6I8	12 kDa	4
185	Semenogelin-1 OS=Homo sapiens GN=SEMG1 PE=1 SV=2	7	0.0416444		P04279	52 kDa	7
186	Alpha-1-acid glycoprotein 2 OS=Homo sapiens GN=ORM2 PE=1 SV=2	6	0.0356952		P19652	24 kDa	5
187	Apolipoprotein A-V OS=Homo sapiens GN=APOA5 PE=1 SV=1	6	0.0356952		Q6Q788	41 kDa	5
188	Creatine kinase M-type OS=Homo sapiens GN=CKM PE=1 SV=2	6	0.0356952		P06732	43 kDa	3
189	Flavin reductase (NADPH) OS=Homo sapiens GN=BLVRB PE=1 SV=3	6	0.0356952		P30043	22 kDa	5
190	Ig kappa chain V-I region HK102 (Fragment) OS=Homo sapiens GN=IGKV1-5 PE=4 SV=1	6	0.0356952		P01602	13 kDa	4
191	Lysozyme C OS=Homo sapiens GN=LYZ PE=1 SV=1	6	0.0356952		P61626	17 kDa	3
192	Mannosyl-oligosaccharide 1,2-alpha-mannosidase IA OS=Homo sapiens GN=MAN1A1 PE=1 SV=3	6	0.0356952		P33908	73 kDa	5
193	Protein IGKV2D-29 OS=Homo sapiens GN=IGKV2D-29 PE=1 SV=1	6	0.0356952		A0A087X0P6	11 kDa	3
194	Protein IGLV3-25 (Fragment) OS=Homo sapiens GN=IGLV3-25 PE=1 SV=2	6	0.0356952		A0A075B6J4	12 kDa	3
195	Retinoic acid receptor responder protein 2 OS=Homo sapiens GN=RARRES2 PE=1 SV=1	6	0.0356952		Q99969	19 kDa	3
196	Serpin A11 OS=Homo sapiens GN=SERPINA11 PE=2 SV=2	6	0.0356952		Q86U17	47 kDa	5
197	Adipocyte plasma membrane-associated protein OS=Homo sapiens GN=APMAP PE=1 SV=2	5	0.029746		Q9HDC9	46 kDa	5
198	Alpha-1B-glycoprotein OS=Homo sapiens GN=A1BG PE=1 SV=4	5	0.029746		P04217	54 kDa	4
199	Annexin A1 OS=Homo sapiens GN=ANXA1 PE=1 SV=2	5	0.029746		P04083	39 kDa	5
200	Caspase-14 OS=Homo sapiens GN=CASP14 PE=1 SV=2	5	0.029746		P31944	28 kDa	3
201	Coagulation factor VIII OS=Homo sapiens GN=F8 PE=1 SV=1	5	0.029746		P00451	267 kDa	5
202	Ficolin-1 OS=Homo sapiens GN=FCN1 PE=1 SV=2	5	0.029746		O00602	35 kDa	5
203	Glutathione peroxidase OS=Homo sapiens GN=GPX3 PE=1 SV=1	5	0.029746		A0A087X1J7 (+1)	25 kDa	3
204	HCG2043239 (Fragment) OS=Homo sapiens GN=IGLV3-9 PE=1 SV=1	5	0.029746		A0A075B6K5	12 kDa	2
205	Phosphoglycerate kinase 1 OS=Homo sapiens GN=PGK1 PE=1 SV=3	5	0.029746		P00558	45 kDa	5
206	Protein IGLV1-51 (Fragment) OS=Homo sapiens GN=IGLV1-51 PE=1 SV=1	5	0.029746		A0A075B6I5	13 kDa	2
207	Annexin A2 OS=Homo sapiens GN=ANXA2 PE=1 SV=2	4	0.0237968		P07355 (+1)	39 kDa	2
208	Catalase OS=Homo sapiens GN=CAT PE=1 SV=3	4	0.0237968		P04040	60 kDa	4
209	Cathelicidin antimicrobial peptide OS=Homo sapiens GN=CAMP PE=1 SV=1	4	0.0237968		J3KNB4	20 kDa	4
210	Ig kappa chain V-I region DEE OS=Homo sapiens PE=1 SV=1	4	0.0237968		P01597	12 kDa	3
211	Moesin OS=Homo sapiens GN=MSN PE=1 SV=3	4	0.0237968		P26038	68 kDa	4
212	Platelet factor 4 OS=Homo sapiens GN=PF4 PE=1 SV=2	4	0.0237968		P02776	11 kDa	3
213	Protein APOC4-APOC2 OS=Homo sapiens GN=APOC4-APOC2 PE=4 SV=1	4	0.0237968		K7ER74	20 kDa	2
214	Protein IGKV1-17 (Fragment) OS=Homo sapiens GN=IGKV1-17 PE=1 SV=1	4	0.0237968		A0A0B4J1Z4	13 kDa	3
215	Protein S100-A9 OS=Homo sapiens GN=S100A9 PE=1 SV=1	4	0.0237968		P06702	13 kDa	2
216	Protein-glutamine gamma-glutamyltransferase E OS=Homo sapiens GN=TGM3 PE=1 SV=4	4	0.0237968		Q08188	77 kDa	4
217	Serpin B12 OS=Homo sapiens GN=SERPINB12 PE=1 SV=1	4	0.0237968		Q96P63 (+1)	46 kDa	3
218	Apolipoprotein C-IV OS=Homo sapiens GN=APOC4 PE=1 SV=1	3	0.0178476		P55056	15 kDa	3
219	Beta-Ala-His dipeptidase OS=Homo sapiens GN=CNDP1 PE=1 SV=4	3	0.0178476		Q96KN2	57 kDa	3
220	C-reactive protein OS=Homo sapiens GN=CRP PE=1 SV=1	3	0.0178476		P02741	25 kDa	3
221	Ficolin-2 OS=Homo sapiens GN=FCN2 PE=1 SV=2	3	0.0178476		Q15485	34 kDa	2
222	GEM-interacting protein (Fragment) OS=Homo sapiens GN=GMIP PE=1 SV=1	3	0.0178476		K7EJC2	33 kDa	2
223	Ig lambda chain V-I region NEW OS=Homo sapiens PE=1 SV=1	3	0.0178476		P01701	11 kDa	2
224	Insulin-like growth factor-binding protein 5 OS=Homo sapiens GN=IGFBP5 PE=1 SV=1	3	0.0178476		P24593	31 kDa	3
225	Isoform 2 of Vitamin K-dependent protein Z OS=Homo sapiens GN=PROZ	3	0.0178476		P22891-2	47 kDa	3
226	Isoform 3 of Complement C1q tumor necrosis factor-related protein 3 OS=Homo sapiens GN=C1QTNF3	3	0.0178476		Q9BXJ4-3	35 kDa	2
227	Isoform 4 of TRAF2 and NCK-interacting protein kinase OS=Homo sapiens GN=TNIK	3	0.0178476		Q9UKE5-4-DECOY (+3)	?	2
228	Mannan-binding lectin serine protease 2 OS=Homo sapiens GN=MASP2 PE=1 SV=4	3	0.0178476		O00187	76 kDa	2
229	Neuropilin-1 OS=Homo sapiens GN=NRP1 PE=1 SV=3	3	0.0178476		O14786	103 kDa	2
230	Neutrophil defensin 1 OS=Homo sapiens GN=DEFA1 PE=1 SV=1	3	0.0178476		P59665 (+1)	10 kDa	2
231	Partitioning defective 3 homolog B OS=Homo sapiens GN=PARD3B PE=1 SV=1	3	0.0178476		R4GN62-DECOY	?	3
232	Peptidyl-prolyl cis-trans isomerase B OS=Homo sapiens GN=PPIB PE=1 SV=2	3	0.0178476		P23284	24 kDa	3
233	Platelet-activating factor acetylhydrolase OS=Homo sapiens GN=PLA2G7 PE=1 SV=1	3	0.0178476		Q13093	50 kDa	2
234	Protein IGHV3-73 (Fragment) OS=Homo sapiens GN=IGHV3-73 PE=1 SV=1	3	0.0178476		A0A0B4J1V6	13 kDa	2
235	Protein IGKV2-24 (Fragment) OS=Homo sapiens GN=IGKV2-24 PE=1 SV=1	3	0.0178476		A0A0C4DH68	13 kDa	2
236	Protein JCHAIN (Fragment) OS=Homo sapiens GN=JCHAIN PE=1 SV=5	3	0.0178476		D6RD17 (+1)	18 kDa	2
237	Ribonuclease 4 OS=Homo sapiens GN=RNASE4 PE=1 SV=3	3	0.0178476		P34096	17 kDa	3
238	Vinculin OS=Homo sapiens GN=VCL PE=1 SV=4	3	0.0178476		P18206 (+1)	124 kDa	3
239	Zinc-alpha-2-glycoprotein OS=Homo sapiens GN=AZGP1 PE=1 SV=2	3	0.0178476		P25311	34 kDa	2
240	6-phosphogluconate dehydrogenase, decarboxylating OS=Homo sapiens GN=PGD PE=1 SV=3	2	0.0118984		P52209 (+1)	53 kDa	2
241	Alcohol dehydrogenase 1B OS=Homo sapiens GN=ADH1B PE=1 SV=2	2	0.0118984		P00325	40 kDa	2
242	Bone morphogenetic protein 1 OS=Homo sapiens GN=BMP1 PE=1 SV=2	2	0.0118984		P13497	111 kDa	2
243	Cornulin OS=Homo sapiens GN=CRNN PE=1 SV=1	2	0.0118984		Q9UBG3	54 kDa	2
244	Cystatin-B OS=Homo sapiens GN=CSTB PE=1 SV=2	2	0.0118984		P04080	11 kDa	2
245	Extracellular matrix protein 1 OS=Homo sapiens GN=ECM1 PE=1 SV=2	2	0.0118984		Q16610 (+1)	61 kDa	2
246	Fatty acid-binding protein, epidermal OS=Homo sapiens GN=FABP5 PE=1 SV=3	2	0.0118984		Q01469	15 kDa	2
247	Histone H4 OS=Homo sapiens GN=HIST1H4A PE=1 SV=2	2	0.0118984		P62805	11 kDa	2
248	Ig heavy chain V-II region WAH OS=Homo sapiens PE=1 SV=1	2	0.0118984		P01824	14 kDa	2
249	Isoform 3 of Insulin-like growth factor II OS=Homo sapiens GN=IGF2	2	0.0118984		P01344-3	26 kDa	2
250	Multimerin-2 OS=Homo sapiens GN=MMRN2 PE=1 SV=2	2	0.0118984		Q9H8L6	104 kDa	2
251	P-selectin OS=Homo sapiens GN=SELP PE=1 SV=3	2	0.0118984		P16109 (+3)	91 kDa	2
252	Peptidyl-prolyl cis-trans isomerase A OS=Homo sapiens GN=PPIA PE=1 SV=2	2	0.0118984		P62937	18 kDa	2
253	Plasminogen activator inhibitor 1 OS=Homo sapiens GN=SERPINE1 PE=1 SV=1	2	0.0118984		P05121	45 kDa	2
254	Platelet basic protein OS=Homo sapiens GN=PPBP PE=1 SV=3	2	0.0118984		P02775	14 kDa	2
255	Polymeric immunoglobulin receptor OS=Homo sapiens GN=PIGR PE=1 SV=4	2	0.0118984		P01833	83 kDa	2
256	Protein IGLV4-60 (Fragment) OS=Homo sapiens GN=IGLV4-60 PE=1 SV=1	2	0.0118984		A0A075B6I1	13 kDa	2
257	Protein IGLV7-43 (Fragment) OS=Homo sapiens GN=IGLV7-43 PE=4 SV=1	2	0.0118984		A0A0B4J1U2 (+1)	12 kDa	2
258	Protein IGLV8-61 (Fragment) OS=Homo sapiens GN=IGLV8-61 PE=1 SV=4	2	0.0118984		A0A075B6I0	13 kDa	2
259	Skin-specific protein 32 OS=Homo sapiens GN=XP32 PE=1 SV=1	2	0.0118984		Q5T750	26 kDa	2
260	Small proline-rich protein 3 (Fragment) OS=Homo sapiens GN=SPRR3 PE=1 SV=5	2	0.0118984		B1AN48 (+1)	17 kDa	2
261	Spectrin beta chain, non-erythrocytic 5 OS=Homo sapiens GN=SPTBN5 PE=1 SV=2	2	0.0118984		Q9NRC6	417 kDa	2

## Sheet: B1400 diluted 5 times
Number	Identified Proteins	Total Spectrum Count B1400 diluted 5 times	Relative abundance (%)	Sum	Accession Number	Molecular Weight	Peptide count
1	Apolipoprotein B-100 OS=Homo sapiens GN=APOB PE=1 SV=2	983	9.43831		P04114	516 kDa	190
2	Complement C3 OS=Homo sapiens GN=C3 PE=1 SV=2	669	6.42343	10415	P01024	187 kDa	105
3	Serum albumin OS=Homo sapiens GN=ALB PE=1 SV=2	387	3.71579		P02768	69 kDa	56
4	Complement C4-A OS=Homo sapiens GN=C4A PE=1 SV=2	385	3.69659		P0C0L4	193 kDa	4
5	Complement C4-B OS=Homo sapiens GN=C4B PE=1 SV=2	382	3.66779		P0C0L5	193 kDa	64
6	Complement factor H OS=Homo sapiens GN=CFH PE=1 SV=4	340	3.26452		P08603	139 kDa	63
7	Plasminogen OS=Homo sapiens GN=PLG PE=1 SV=2	295	2.83245		P00747	91 kDa	54
8	Prothrombin OS=Homo sapiens GN=F2 PE=1 SV=2	269	2.58281		P00734	70 kDa	39
9	Alpha-2-macroglobulin OS=Homo sapiens GN=A2M PE=1 SV=3	266	2.55401		P01023	163 kDa	51
10	C4b-binding protein alpha chain OS=Homo sapiens GN=C4BPA PE=1 SV=2	247	2.37158		P04003	67 kDa	39
11	Apolipoprotein A-I OS=Homo sapiens GN=APOA1 PE=1 SV=1	240	2.30437		P02647	31 kDa	32
12	Antithrombin-III OS=Homo sapiens GN=SERPINC1 PE=1 SV=1	234	2.24676		P01008	53 kDa	34
13	Apolipoprotein E OS=Homo sapiens GN=APOE PE=1 SV=1	176	1.68987		P02649	36 kDa	27
14	Histidine-rich glycoprotein OS=Homo sapiens GN=HRG PE=1 SV=1	167	1.60346		P04196	60 kDa	30
15	Hornerin OS=Homo sapiens GN=HRNR PE=1 SV=2	159	1.52664		Q86YZ3	282 kDa	30
16	Isoform LMW of Kininogen-1 OS=Homo sapiens GN=KNG1	156	1.49784		P01042-2	48 kDa	2
17	Kininogen-1 OS=Homo sapiens GN=KNG1 PE=1 SV=2	154	1.47864		P01042	72 kDa	35
18	Plasma kallikrein (Fragment) OS=Homo sapiens GN=KLKB1 PE=1 SV=1	154	1.47864		H0YAC1	77 kDa	30
19	Vitronectin OS=Homo sapiens GN=VTN PE=1 SV=1	136	1.30581		P04004	54 kDa	25
20	Coagulation factor V OS=Homo sapiens GN=F5 PE=1 SV=1	134	1.28661		A0A0A0MRJ7 (+1)	252 kDa	43
21	Coagulation factor XII OS=Homo sapiens GN=F12 PE=1 SV=3	122	1.17139		P00748	68 kDa	31
22	Uncharacterized protein OS=Homo sapiens PE=1 SV=1	114	1.09458		B4E1Z4	141 kDa	28
23	Plasma protease C1 inhibitor OS=Homo sapiens GN=SERPING1 PE=1 SV=2	113	1.08497		P05155 (+1)	55 kDa	17
24	Inter-alpha-trypsin inhibitor heavy chain H2 OS=Homo sapiens GN=ITIH2 PE=1 SV=1	104	0.99856		Q5T985	105 kDa	22
25	Ig kappa chain C region OS=Homo sapiens GN=IGKC PE=1 SV=1	99	0.950552		A0A087X130	25 kDa	2
26	Protein IGKV3-11 OS=Homo sapiens GN=IGKV3-11 PE=4 SV=1	99	0.950552		A0A087WZW8	26 kDa	13
27	Gelsolin OS=Homo sapiens GN=GSN PE=1 SV=1	96	0.921747		P06396	86 kDa	28
28	Ig gamma-1 chain C region OS=Homo sapiens GN=IGHG1 PE=1 SV=1	96	0.921747		A0A087WV47	51 kDa	18
29	Ig mu chain C region OS=Homo sapiens GN=IGHM PE=1 SV=1	95	0.912146		A0A087X2C0	64 kDa	19
30	Inter-alpha-trypsin inhibitor heavy chain H1 OS=Homo sapiens GN=ITIH1 PE=1 SV=3	90	0.864138		P19827	101 kDa	21
31	Ig gamma-1 chain C region OS=Homo sapiens GN=IGHG1 PE=1 SV=1	88	0.844935		A0A087WYC5	52 kDa	2
32	Ig gamma-3 chain C region OS=Homo sapiens GN=IGHG3 PE=1 SV=1	86	0.825732		A0A087WXL8	57 kDa	7
33	Complement C1q subcomponent subunit B OS=Homo sapiens GN=C1QB PE=1 SV=1	76	0.729717		D6R934 (+1)	26 kDa	8
34	Complement C1s subcomponent OS=Homo sapiens GN=C1S PE=1 SV=1	76	0.729717		P09871	77 kDa	21
35	Complement C5 OS=Homo sapiens GN=C5 PE=1 SV=4	74	0.710514		P01031	188 kDa	36
36	Complement C1r subcomponent OS=Homo sapiens GN=C1R PE=1 SV=1	70	0.672108		B4DPQ0	82 kDa	22
37	Coagulation factor XI OS=Homo sapiens GN=F11 PE=1 SV=1	67	0.643303		P03951	70 kDa	20
38	Desmoplakin OS=Homo sapiens GN=DSP PE=1 SV=3	66	0.633701		P15924	332 kDa	23
39	Carboxypeptidase B2 OS=Homo sapiens GN=CPB2 PE=1 SV=2	64	0.614498		Q96IY4	48 kDa	13
40	Alpha-1-antitrypsin OS=Homo sapiens GN=SERPINA1 PE=1 SV=3	62	0.595295		P01009	47 kDa	21
41	Desmoglein-1 OS=Homo sapiens GN=DSG1 PE=1 SV=2	61	0.585694		Q02413	114 kDa	15
42	Ig gamma-2 chain C region OS=Homo sapiens GN=IGHG2 PE=1 SV=2	61	0.585694		P01859	36 kDa	6
43	Vitamin K-dependent protein S OS=Homo sapiens GN=PROS1 PE=1 SV=1	58	0.556889		P07225	75 kDa	16
44	Complement factor H-related protein 1 OS=Homo sapiens GN=CFHR1 PE=1 SV=2	55	0.528084		Q03591	38 kDa	7
45	Heparin cofactor 2 OS=Homo sapiens GN=SERPIND1 PE=1 SV=3	52	0.49928		P05546	57 kDa	14
46	Ig alpha-1 chain C region OS=Homo sapiens GN=IGHA1 PE=1 SV=2	52	0.49928		P01876	38 kDa	13
47	Beta-2-glycoprotein 1 OS=Homo sapiens GN=APOH PE=1 SV=3	48	0.460874		P02749	38 kDa	12
48	Coagulation factor X OS=Homo sapiens GN=F10 PE=1 SV=2	48	0.460874		P00742	55 kDa	13
49	Coagulation factor IX OS=Homo sapiens GN=F9 PE=1 SV=2	47	0.451272		P00740	52 kDa	11
50	Complement component C9 OS=Homo sapiens GN=C9 PE=1 SV=2	46	0.441671		P02748	63 kDa	19
51	Apolipoprotein A-IV OS=Homo sapiens GN=APOA4 PE=1 SV=3	45	0.432069		P06727	45 kDa	17
52	Complement component C8 beta chain OS=Homo sapiens GN=C8B PE=1 SV=3	45	0.432069		P07358	67 kDa	20
53	Keratinocyte proline-rich protein OS=Homo sapiens GN=KPRP PE=1 SV=1	45	0.432069		Q5T749	64 kDa	13
54	Isoform 2 of Apolipoprotein L1 OS=Homo sapiens GN=APOL1	43	0.412866		O14791-2	46 kDa	16
55	Plasma serine protease inhibitor OS=Homo sapiens GN=SERPINA5 PE=1 SV=3	43	0.412866		P05154	46 kDa	11
56	Complement factor H-related protein 5 OS=Homo sapiens GN=CFHR5 PE=1 SV=1	42	0.403265		Q9BXR6	64 kDa	19
57	Sulfhydryl oxidase 1 OS=Homo sapiens GN=QSOX1 PE=1 SV=3	42	0.403265		O00391	83 kDa	17
58	Ig lambda-3 chain C regions (Fragment) OS=Homo sapiens GN=IGLC3 PE=1 SV=2	39	0.37446		A0A075B6L0	11 kDa	2
59	Apolipoprotein(a) OS=Homo sapiens GN=LPA PE=1 SV=1	38	0.364858		P08519	501 kDa	21
60	Complement C1q subcomponent subunit C OS=Homo sapiens GN=C1QC PE=1 SV=3	36	0.345655		P02747	26 kDa	6
61	Ig alpha-2 chain C region OS=Homo sapiens GN=IGHA2 PE=1 SV=3	35	0.336054		P01877	37 kDa	3
62	Protein SAA2-SAA4 OS=Homo sapiens GN=SAA2-SAA4 PE=4 SV=1	35	0.336054		A0A096LPE2	23 kDa	6
63	Insulin-like growth factor-binding protein complex acid labile subunit OS=Homo sapiens GN=IGFALS PE=1 SV=1	34	0.326452		P35858 (+1)	66 kDa	12
64	Junction plakoglobin OS=Homo sapiens GN=JUP PE=1 SV=3	34	0.326452		P14923	82 kDa	17
65	Immunoglobulin lambda-like polypeptide 5 OS=Homo sapiens GN=IGLL5 PE=1 SV=1	33	0.316851		A0A087WYR4	25 kDa	7
66	Serotransferrin OS=Homo sapiens GN=TF PE=1 SV=3	33	0.316851		P02787	77 kDa	22
67	78 kDa glucose-regulated protein OS=Homo sapiens GN=HSPA5 PE=1 SV=2	31	0.297648		P11021	72 kDa	13
68	Alpha-2-antiplasmin OS=Homo sapiens GN=SERPINF2 PE=1 SV=3	31	0.297648		P08697	55 kDa	11
69	Properdin OS=Homo sapiens GN=CFP PE=1 SV=2	30	0.288046		P27918	51 kDa	13
70	Ceruloplasmin OS=Homo sapiens GN=CP PE=1 SV=1	29	0.278445		P00450	122 kDa	15
71	Selenoprotein P OS=Homo sapiens GN=SEPP1 PE=1 SV=3	29	0.278445		P49908	43 kDa	7
72	Complement component C6 OS=Homo sapiens GN=C6 PE=1 SV=3	28	0.268843		P13671	105 kDa	14
73	Complement factor H-related protein 2 OS=Homo sapiens GN=CFHR2 PE=1 SV=1	25	0.240038		P36980 (+1)	31 kDa	2
74	Dermcidin OS=Homo sapiens GN=DCD PE=1 SV=2	25	0.240038		P81605	11 kDa	5
75	Ig alpha-2 chain C region (Fragment) OS=Homo sapiens GN=IGHA2 PE=1 SV=1	25	0.240038		A0A075B6N7	37 kDa	2
76	Inter-alpha-trypsin inhibitor heavy chain H4 OS=Homo sapiens GN=ITIH4 PE=1 SV=4	24	0.230437		Q14624	103 kDa	13
77	Isoform 2 of Clusterin OS=Homo sapiens GN=CLU	23	0.220835		P10909-2	58 kDa	13
78	Tetranectin OS=Homo sapiens GN=CLEC3B PE=1 SV=1	23	0.220835		E9PHK0	18 kDa	7
79	Transthyretin OS=Homo sapiens GN=TTR PE=1 SV=1	23	0.220835		A0A087WV45	15 kDa	8
80	Complement component C8 alpha chain OS=Homo sapiens GN=C8A PE=1 SV=2	22	0.211234		P07357	65 kDa	16
81	Hyaluronan-binding protein 2 OS=Homo sapiens GN=HABP2 PE=1 SV=1	22	0.211234		Q14520	63 kDa	8
82	Ig kappa chain V-III region HAH OS=Homo sapiens PE=2 SV=1	22	0.211234		P18135	14 kDa	5
83	Serum amyloid P-component OS=Homo sapiens GN=APCS PE=1 SV=2	22	0.211234		P02743	25 kDa	6
84	Caspase-14 OS=Homo sapiens GN=CASP14 PE=1 SV=2	21	0.201632		P31944	28 kDa	6
85	Complement component C7 OS=Homo sapiens GN=C7 PE=1 SV=2	21	0.201632		P10643	94 kDa	19
86	Annexin A2 OS=Homo sapiens GN=ANXA2 PE=1 SV=2	20	0.192031		P07355 (+1)	39 kDa	5
87	Protein-glutamine gamma-glutamyltransferase E OS=Homo sapiens GN=TGM3 PE=1 SV=4	20	0.192031		Q08188	77 kDa	6
88	Alpha-2-HS-glycoprotein OS=Homo sapiens GN=AHSG PE=1 SV=1	19	0.182429		P02765	39 kDa	7
89	Alpha-synuclein OS=Homo sapiens GN=SNCA PE=1 SV=1	19	0.182429		E7EPV7 (+2)	12 kDa	6
90	Desmocollin-1 OS=Homo sapiens GN=DSC1 PE=1 SV=2	19	0.182429		Q08554	100 kDa	7
91	Filaggrin-2 OS=Homo sapiens GN=FLG2 PE=1 SV=1	19	0.182429		Q5D862	248 kDa	7
92	Protein S100-A8 OS=Homo sapiens GN=S100A8 PE=1 SV=1	19	0.182429		P05109	11 kDa	3
93	Trypsin-1 OS=Homo sapiens GN=PRSS1 PE=1 SV=1	19	0.182429		P07477	27 kDa	3
94	Vitamin K-dependent protein C OS=Homo sapiens GN=PROC PE=1 SV=1	19	0.182429		E7END6 (+2)	55 kDa	9
95	Amyloid beta A4 protein OS=Homo sapiens GN=APP PE=1 SV=1	18	0.172828		A0A0A0MRG2 (+2)	75 kDa	2
96	Apolipoprotein A-II OS=Homo sapiens GN=APOA2 PE=1 SV=1	18	0.172828		V9GYM3	15 kDa	5
97	Carboxypeptidase N catalytic chain OS=Homo sapiens GN=CPN1 PE=1 SV=1	18	0.172828		P15169	52 kDa	10
98	Filaggrin OS=Homo sapiens GN=FLG PE=1 SV=3	18	0.172828		P20930	435 kDa	9
99	Haptoglobin-related protein OS=Homo sapiens GN=HPR PE=2 SV=2	18	0.172828		P00739 (+1)	39 kDa	15
100	Hemoglobin subunit beta OS=Homo sapiens GN=HBB PE=1 SV=2	18	0.172828		P68871	16 kDa	8
101	Apolipoprotein C-I (Fragment) OS=Homo sapiens GN=APOC1 PE=1 SV=1	17	0.163226		K7ERI9 (+1)	9 kDa	8
102	Complement factor H-related protein 3 OS=Homo sapiens GN=CFHR3 PE=1 SV=2	17	0.163226		Q02985	37 kDa	2
103	Haptoglobin OS=Homo sapiens GN=HP PE=1 SV=4	17	0.163226		H0Y300	49 kDa	6
104	Protein S100-A9 OS=Homo sapiens GN=S100A9 PE=1 SV=1	17	0.163226		P06702	13 kDa	3
105	CD5 antigen-like OS=Homo sapiens GN=CD5L PE=1 SV=1	16	0.153625		O43866	38 kDa	11
106	Fibronectin OS=Homo sapiens GN=FN1 PE=1 SV=4	16	0.153625		P02751 (+5)	263 kDa	11
107	Ig kappa chain V-III region NG9 (Fragment) OS=Homo sapiens PE=2 SV=1	16	0.153625		P01621	11 kDa	2
108	Isoform 2 of Insulin-like growth factor-binding protein 3 OS=Homo sapiens GN=IGFBP3	16	0.153625		P17936-2	32 kDa	7
109	Lactotransferrin (Fragment) OS=Homo sapiens GN=LTF PE=1 SV=1	16	0.153625		E7EQB2	77 kDa	13
110	Protein AMBP OS=Homo sapiens GN=AMBP PE=1 SV=1	16	0.153625		P02760	39 kDa	9
111	Protein S100-A7 OS=Homo sapiens GN=S100A7 PE=1 SV=4	16	0.153625		P31151	11 kDa	3
112	Serpin B12 OS=Homo sapiens GN=SERPINB12 PE=1 SV=1	16	0.153625		Q96P63 (+1)	46 kDa	4
113	Cartilage acidic protein 1 OS=Homo sapiens GN=CRTAC1 PE=1 SV=1	15	0.144023		A0A0C4DFP6 (+2)	70 kDa	10
114	Catalase OS=Homo sapiens GN=CAT PE=1 SV=3	15	0.144023		P04040	60 kDa	4
115	Kallistatin OS=Homo sapiens GN=SERPINA4 PE=1 SV=3	15	0.144023		P29622	49 kDa	11
116	Actin, cytoplasmic 1 OS=Homo sapiens GN=ACTB PE=1 SV=1	14	0.134422		P60709 (+1)	42 kDa	2
117	Isoform F of Proteoglycan 4 OS=Homo sapiens GN=PRG4	14	0.134422		Q92954-6	146 kDa	6
118	Glyceraldehyde-3-phosphate dehydrogenase OS=Homo sapiens GN=GAPDH PE=1 SV=3	13	0.12482		P04406	36 kDa	4
119	Prolactin-inducible protein OS=Homo sapiens GN=PIP PE=1 SV=1	13	0.12482		P12273	17 kDa	3
120	Apolipoprotein D (Fragment) OS=Homo sapiens GN=APOD PE=1 SV=1	12	0.115218		C9JF17 (+1)	24 kDa	6
121	Fatty acid-binding protein, epidermal OS=Homo sapiens GN=FABP5 PE=1 SV=3	12	0.115218		Q01469	15 kDa	4
122	Fibrinogen gamma chain OS=Homo sapiens GN=FGG PE=1 SV=3	12	0.115218		P02679 (+1)	52 kDa	7
123	Hepatocyte growth factor activator OS=Homo sapiens GN=HGFAC PE=1 SV=1	12	0.115218		D6RAR4 (+1)	71 kDa	5
124	Isoform 2 of N-acetylmuramoyl-L-alanine amidase OS=Homo sapiens GN=PGLYRP2	12	0.115218		Q96PD5-2	68 kDa	7
125	Protein Z-dependent protease inhibitor OS=Homo sapiens GN=SERPINA10 PE=1 SV=1	12	0.115218		G3V2W1 (+1)	55 kDa	6
126	Mannan-binding lectin serine protease 1 OS=Homo sapiens GN=MASP1 PE=1 SV=3	11	0.105617		P48740	79 kDa	7
127	Procollagen C-endopeptidase enhancer 1 OS=Homo sapiens GN=PCOLCE PE=1 SV=2	11	0.105617		Q15113	48 kDa	9
128	Actin, aortic smooth muscle OS=Homo sapiens GN=ACTA2 PE=1 SV=1	10	0.0960154		P62736 (+1)	42 kDa	3
129	Complement factor D OS=Homo sapiens GN=CFD PE=1 SV=1	10	0.0960154		K7ERG9 (+1)	28 kDa	3
130	Protein IGHV3-72 OS=Homo sapiens GN=IGHV3-72 PE=1 SV=1	10	0.0960154		A0A087WW89	11 kDa	3
131	Secreted phosphoprotein 24 OS=Homo sapiens GN=SPP2 PE=1 SV=1	10	0.0960154		Q13103	24 kDa	5
132	Zinc-alpha-2-glycoprotein OS=Homo sapiens GN=AZGP1 PE=1 SV=2	10	0.0960154		P25311	34 kDa	4
133	Fibrinogen beta chain OS=Homo sapiens GN=FGB PE=1 SV=2	9	0.0864138		P02675	56 kDa	7
134	Hemoglobin subunit alpha OS=Homo sapiens GN=HBA1 PE=1 SV=2	9	0.0864138		P69905	15 kDa	4
135	Lipopolysaccharide-binding protein OS=Homo sapiens GN=LBP PE=1 SV=3	9	0.0864138		P18428	53 kDa	7
136	Serpin B3 OS=Homo sapiens GN=SERPINB3 PE=1 SV=2	9	0.0864138		P29508	45 kDa	4
137	Serum paraoxonase/arylesterase 1 OS=Homo sapiens GN=PON1 PE=1 SV=3	9	0.0864138		P27169	40 kDa	7
138	Skin-specific protein 32 OS=Homo sapiens GN=XP32 PE=1 SV=1	9	0.0864138		Q5T750	26 kDa	4
139	Arginase-1 OS=Homo sapiens GN=ARG1 PE=1 SV=2	8	0.0768123		P05089	35 kDa	3
140	Complement C1q subcomponent subunit A OS=Homo sapiens GN=C1QA PE=1 SV=2	8	0.0768123		P02745	26 kDa	4
141	Fibulin-1 OS=Homo sapiens GN=FBLN1 PE=1 SV=4	8	0.0768123		P23142	77 kDa	6
142	Ig delta chain C region (Fragment) OS=Homo sapiens GN=IGHD PE=1 SV=1	8	0.0768123		A0A0A0MS09	48 kDa	6
143	Isoform B of Coagulation factor VII OS=Homo sapiens GN=F7	8	0.0768123		P08709-2	49 kDa	6
144	Lysozyme C OS=Homo sapiens GN=LYZ PE=1 SV=1	8	0.0768123		P61626	17 kDa	4
145	Thrombospondin-1 OS=Homo sapiens GN=THBS1 PE=1 SV=2	8	0.0768123		P07996	129 kDa	6
146	Cathelicidin antimicrobial peptide OS=Homo sapiens GN=CAMP PE=1 SV=1	7	0.0672108		J3KNB4	20 kDa	6
147	Complement component C8 gamma chain OS=Homo sapiens GN=C8G PE=1 SV=3	7	0.0672108		P07360	22 kDa	5
148	Complement factor I OS=Homo sapiens GN=CFI PE=1 SV=1	7	0.0672108		E7ETH0	67 kDa	5
149	Gamma-glutamylcyclotransferase OS=Homo sapiens GN=GGCT PE=1 SV=1	7	0.0672108		O75223	21 kDa	4
150	Ig lambda chain V-III region SH OS=Homo sapiens PE=1 SV=1	7	0.0672108		P01714	11 kDa	2
151	Protein JCHAIN (Fragment) OS=Homo sapiens GN=JCHAIN PE=1 SV=5	7	0.0672108		D6RD17 (+1)	18 kDa	3
152	Pyruvate kinase PKM OS=Homo sapiens GN=PKM PE=1 SV=4	7	0.0672108		P14618	58 kDa	3
153	Suprabasin OS=Homo sapiens GN=SBSN PE=1 SV=2	7	0.0672108		Q6UWP8	61 kDa	2
154	Angiotensinogen OS=Homo sapiens GN=AGT PE=1 SV=1	6	0.0576092		P01019	53 kDa	5
155	Apolipoprotein C-IV OS=Homo sapiens GN=APOC4 PE=1 SV=1	6	0.0576092		P55056	15 kDa	4
156	Ig kappa chain V-IV region Len OS=Homo sapiens PE=1 SV=2	6	0.0576092		P01625	13 kDa	3
157	Isoform 2 of C4b-binding protein beta chain OS=Homo sapiens GN=C4BPB	6	0.0576092		P20851-2	28 kDa	5
158	Isoform 2 of Ficolin-3 OS=Homo sapiens GN=FCN3	6	0.0576092		O75636-2	32 kDa	5
159	Isoform 3 of L-lactate dehydrogenase A chain OS=Homo sapiens GN=LDHA	6	0.0576092		P00338-3	40 kDa	4
160	Multiple inositol polyphosphate phosphatase 1 OS=Homo sapiens GN=MINPP1 PE=1 SV=1	6	0.0576092		Q9UNW1	55 kDa	5
161	Protein APOC4-APOC2 OS=Homo sapiens GN=APOC4-APOC2 PE=4 SV=1	6	0.0576092		K7ER74	20 kDa	3
162	Protein IGHV5-51 (Fragment) OS=Homo sapiens GN=IGHV5-51 PE=1 SV=1	6	0.0576092		A0A0C4DH38	13 kDa	3
163	Angiogenin OS=Homo sapiens GN=ANG PE=1 SV=1	5	0.0480077		P03950	17 kDa	5
164	Apolipoprotein C-III OS=Homo sapiens GN=APOC3 PE=1 SV=1	5	0.0480077		B0YIW2 (+1)	13 kDa	2
165	Cathepsin D OS=Homo sapiens GN=CTSD PE=1 SV=1	5	0.0480077		P07339	45 kDa	2
166	Cystatin-A OS=Homo sapiens GN=CSTA PE=1 SV=1	5	0.0480077		P01040	11 kDa	2
167	Dihydrolipoyl dehydrogenase, mitochondrial OS=Homo sapiens GN=DLD PE=1 SV=2	5	0.0480077		P09622	54 kDa	2
168	Ig kappa chain V-I region Scw OS=Homo sapiens PE=1 SV=1	5	0.0480077		P01609	12 kDa	2
169	Insulin-like growth factor-binding protein 2 OS=Homo sapiens GN=IGFBP2 PE=1 SV=2	5	0.0480077		P18065	35 kDa	3
170	Plakophilin-1 OS=Homo sapiens GN=PKP1 PE=1 SV=2	5	0.0480077		Q13835	83 kDa	2
171	Thioredoxin OS=Homo sapiens GN=TXN PE=1 SV=3	5	0.0480077		P10599 (+1)	12 kDa	2
172	Alpha-1-antichymotrypsin OS=Homo sapiens GN=SERPINA3 PE=1 SV=2	4	0.0384061		P01011	48 kDa	3
173	Carboxypeptidase N subunit 2 OS=Homo sapiens GN=CPN2 PE=1 SV=3	4	0.0384061		P22792	61 kDa	4
174	Corneodesmosin OS=Homo sapiens GN=CDSN PE=1 SV=1	4	0.0384061		G8JLG2	52 kDa	2
175	Galectin-7 OS=Homo sapiens GN=LGALS7 PE=1 SV=2	4	0.0384061		P47929	15 kDa	2
176	HCG2043239 (Fragment) OS=Homo sapiens GN=IGLV3-9 PE=1 SV=1	4	0.0384061		A0A075B6K5	12 kDa	2
177	Hepatocyte growth factor-like protein OS=Homo sapiens GN=MST1 PE=1 SV=1	4	0.0384061		G3XAK1 (+1)	82 kDa	3
178	Histone H4 OS=Homo sapiens GN=HIST1H4A PE=1 SV=2	4	0.0384061		P62805	11 kDa	2
179	Neutrophil defensin 1 OS=Homo sapiens GN=DEFA1 PE=1 SV=1	4	0.0384061		P59665 (+1)	10 kDa	2
180	Transforming growth factor-beta-induced protein ig-h3 OS=Homo sapiens GN=TGFBI PE=1 SV=1	4	0.0384061		Q15582	75 kDa	4
181	Afamin OS=Homo sapiens GN=AFM PE=1 SV=1	3	0.0288046		P43652	69 kDa	2
182	Alpha-1-acid glycoprotein 2 OS=Homo sapiens GN=ORM2 PE=1 SV=2	3	0.0288046		P19652	24 kDa	3
183	Cornifin-B OS=Homo sapiens GN=SPRR1B PE=1 SV=2	3	0.0288046		P22528	10 kDa	2
184	Fibrinogen alpha chain OS=Homo sapiens GN=FGA PE=1 SV=2	3	0.0288046		P02671	95 kDa	3
185	Fructose-bisphosphate aldolase OS=Homo sapiens GN=ALDOA PE=1 SV=1	3	0.0288046		J3KPS3 (+1)	40 kDa	3
186	Hemopexin OS=Homo sapiens GN=HPX PE=1 SV=2	3	0.0288046		P02790	52 kDa	3
187	Isoform 2 of Calsyntenin-1 OS=Homo sapiens GN=CLSTN1	3	0.0288046		O94985-2	109 kDa	3
188	Isoform 3 of Collagen alpha-1(XVIII) chain OS=Homo sapiens GN=COL18A1	3	0.0288046		P39060-2	136 kDa	3
189	Isoform 3 of Insulin-like growth factor II OS=Homo sapiens GN=IGF2	3	0.0288046		P01344-3	26 kDa	2
190	Mannosyl-oligosaccharide 1,2-alpha-mannosidase IA OS=Homo sapiens GN=MAN1A1 PE=1 SV=3	3	0.0288046		P33908	73 kDa	2
191	Peroxiredoxin-2 OS=Homo sapiens GN=PRDX2 PE=1 SV=5	3	0.0288046		P32119	22 kDa	2
192	Pigment epithelium-derived factor OS=Homo sapiens GN=SERPINF1 PE=1 SV=4	3	0.0288046		P36955	46 kDa	3
193	Platelet factor 4 OS=Homo sapiens GN=PF4 PE=1 SV=2	3	0.0288046		P02776	11 kDa	2
194	Protein IGHV3-15 (Fragment) OS=Homo sapiens GN=IGHV3-15 PE=1 SV=1	3	0.0288046		A0A0B4J1V0	13 kDa	2
195	Protein IGKV2D-29 OS=Homo sapiens GN=IGKV2D-29 PE=1 SV=1	3	0.0288046		A0A087X0P6	11 kDa	2
196	Protein IGLV3-25 (Fragment) OS=Homo sapiens GN=IGLV3-25 PE=1 SV=2	3	0.0288046		A0A075B6J4	12 kDa	2
197	Protein-glutamine gamma-glutamyltransferase K OS=Homo sapiens GN=TGM1 PE=1 SV=4	3	0.0288046		P22735	90 kDa	2
198	Retinoic acid receptor responder protein 2 OS=Homo sapiens GN=RARRES2 PE=1 SV=1	3	0.0288046		Q99969	19 kDa	2
199	Adipocyte plasma membrane-associated protein OS=Homo sapiens GN=APMAP PE=1 SV=2	2	0.0192031		Q9HDC9	46 kDa	2
200	Alpha-1B-glycoprotein OS=Homo sapiens GN=A1BG PE=1 SV=4	2	0.0192031		P04217	54 kDa	2
201	Angiopoietin-related protein 3 OS=Homo sapiens GN=ANGPTL3 PE=1 SV=1	2	0.0192031		Q9Y5C1	54 kDa	2
202	Annexin A1 OS=Homo sapiens GN=ANXA1 PE=1 SV=2	2	0.0192031		P04083	39 kDa	2
203	Apolipoprotein M OS=Homo sapiens GN=APOM PE=1 SV=2	2	0.0192031		O95445	21 kDa	2
204	Cathepsin S OS=Homo sapiens GN=CTSS PE=1 SV=3	2	0.0192031		P25774	37 kDa	2
205	Glutathione peroxidase OS=Homo sapiens GN=GPX3 PE=1 SV=1	2	0.0192031		A0A087X1J7 (+1)	25 kDa	2
206	Insulin-like growth factor-binding protein 5 OS=Homo sapiens GN=IGFBP5 PE=1 SV=1	2	0.0192031		P24593	31 kDa	2
207	Inter-alpha-trypsin inhibitor heavy chain H3 OS=Homo sapiens GN=ITIH3 PE=1 SV=2	2	0.0192031		Q06033 (+1)	100 kDa	2
208	Protein IGLV8-61 (Fragment) OS=Homo sapiens GN=IGLV8-61 PE=1 SV=4	2	0.0192031		A0A075B6I0	13 kDa	2
209	Ribonuclease 4 OS=Homo sapiens GN=RNASE4 PE=1 SV=3	2	0.0192031		P34096	17 kDa	2
210	Vitamin D-binding protein OS=Homo sapiens GN=GC PE=1 SV=1	2	0.0192031		P02774 (+1)	53 kDa	2

## Sheet: B20 undiluted
Number	Identified Proteins	Total Spectrum Count B20 undiluted	Relative abundance (%)	Sum	Accession Number	Molecular Weight	Peptide count
1	Apolipoprotein B-100 OS=Homo sapiens GN=APOB PE=1 SV=2	1349	8.0312		P04114	516 kDa	238
2	Complement C3 OS=Homo sapiens GN=C3 PE=1 SV=2	1301	7.74543	16797	P01024	187 kDa	146
3	Complement C4-A OS=Homo sapiens GN=C4A PE=1 SV=2	706	4.20313		P0C0L4	193 kDa	7
4	Complement C4-B OS=Homo sapiens GN=C4B PE=1 SV=2	702	4.17932		P0C0L5	193 kDa	127
5	Serum albumin OS=Homo sapiens GN=ALB PE=1 SV=2	682	4.06025		P02768	69 kDa	70
6	Alpha-2-macroglobulin OS=Homo sapiens GN=A2M PE=1 SV=3	585	3.48276		P01023	163 kDa	74
7	Complement factor H OS=Homo sapiens GN=CFH PE=1 SV=4	577	3.43514		P08603	139 kDa	92
8	C4b-binding protein alpha chain OS=Homo sapiens GN=C4BPA PE=1 SV=2	445	2.64928		P04003	67 kDa	53
9	Apolipoprotein A-I OS=Homo sapiens GN=APOA1 PE=1 SV=1	434	2.58379		P02647	31 kDa	65
10	Plasminogen OS=Homo sapiens GN=PLG PE=1 SV=2	431	2.56593		P00747	91 kDa	77
11	Prothrombin OS=Homo sapiens GN=F2 PE=1 SV=2	401	2.38733		P00734	70 kDa	54
12	Antithrombin-III OS=Homo sapiens GN=SERPINC1 PE=1 SV=1	371	2.20873		P01008	53 kDa	42
13	Histidine-rich glycoprotein OS=Homo sapiens GN=HRG PE=1 SV=1	286	1.70269		P04196	60 kDa	39
14	Coagulation factor V OS=Homo sapiens GN=F5 PE=1 SV=1	238	1.41692		A0A0A0MRJ7 (+1)	252 kDa	51
15	Apolipoprotein E OS=Homo sapiens GN=APOE PE=1 SV=1	237	1.41097		P02649	36 kDa	35
16	Plasma kallikrein (Fragment) OS=Homo sapiens GN=KLKB1 PE=1 SV=1	235	1.39906		H0YAC1	77 kDa	41
17	Isoform LMW of Kininogen-1 OS=Homo sapiens GN=KNG1	209	1.24427		P01042-2	48 kDa	2
18	Kininogen-1 OS=Homo sapiens GN=KNG1 PE=1 SV=2	209	1.24427		P01042	72 kDa	37
19	Coagulation factor XII OS=Homo sapiens GN=F12 PE=1 SV=3	201	1.19664		P00748	68 kDa	46
20	Ig mu chain C region OS=Homo sapiens GN=IGHM PE=1 SV=1	180	1.07162		A0A087X2C0	64 kDa	25
21	Vitronectin OS=Homo sapiens GN=VTN PE=1 SV=1	173	1.02995		P04004	54 kDa	30
22	Complement C5 OS=Homo sapiens GN=C5 PE=1 SV=4	172	1.02399		P01031	188 kDa	60
23	Inter-alpha-trypsin inhibitor heavy chain H2 OS=Homo sapiens GN=ITIH2 PE=1 SV=1	172	1.02399		Q5T985	105 kDa	32
24	Plasma protease C1 inhibitor OS=Homo sapiens GN=SERPING1 PE=1 SV=2	172	1.02399		P05155 (+1)	55 kDa	26
25	Uncharacterized protein OS=Homo sapiens PE=1 SV=1	171	1.01804		B4E1Z4	141 kDa	32
26	Inter-alpha-trypsin inhibitor heavy chain H1 OS=Homo sapiens GN=ITIH1 PE=1 SV=3	149	0.887063		P19827	101 kDa	27
27	Ig gamma-1 chain C region OS=Homo sapiens GN=IGHG1 PE=1 SV=1	144	0.857296		A0A087WV47	51 kDa	18
28	Complement C1r subcomponent OS=Homo sapiens GN=C1R PE=1 SV=1	140	0.833482		B4DPQ0	82 kDa	37
29	Alpha-1-antitrypsin OS=Homo sapiens GN=SERPINA1 PE=1 SV=3	134	0.797762		P01009	47 kDa	28
30	Ig gamma-1 chain C region OS=Homo sapiens GN=IGHG1 PE=1 SV=1	133	0.791808		A0A087WYC5	52 kDa	2
31	Gelsolin OS=Homo sapiens GN=GSN PE=1 SV=1	129	0.767994		P06396	86 kDa	37
32	Apolipoprotein A-IV OS=Homo sapiens GN=APOA4 PE=1 SV=3	127	0.756087		P06727	45 kDa	30
33	Ig gamma-3 chain C region OS=Homo sapiens GN=IGHG3 PE=1 SV=1	122	0.72632		A0A087WXL8	57 kDa	13
34	Coagulation factor XI OS=Homo sapiens GN=F11 PE=1 SV=1	120	0.714413		P03951	70 kDa	33
35	Complement C1s subcomponent OS=Homo sapiens GN=C1S PE=1 SV=1	116	0.6906		P09871	77 kDa	30
36	Protein IGKV3-11 OS=Homo sapiens GN=IGKV3-11 PE=4 SV=1	108	0.642972		A0A087WZW8	26 kDa	27
37	Ig kappa chain C region OS=Homo sapiens GN=IGKC PE=1 SV=1	104	0.619158		A0A087WTX5	26 kDa	4
38	Ig kappa chain C region OS=Homo sapiens GN=IGKC PE=1 SV=1	104	0.619158		A0A087X130	25 kDa	3
39	Ig kappa chain C region OS=Homo sapiens GN=IGKC PE=1 SV=1	102	0.607251		A0A087WYL9	26 kDa	5
40	Carboxypeptidase B2 OS=Homo sapiens GN=CPB2 PE=1 SV=2	98	0.583438		Q96IY4	48 kDa	17
41	Hornerin OS=Homo sapiens GN=HRNR PE=1 SV=2	96	0.571531		Q86YZ3	282 kDa	26
42	Vitamin K-dependent protein S OS=Homo sapiens GN=PROS1 PE=1 SV=1	95	0.565577		P07225	75 kDa	23
43	Complement factor H-related protein 1 OS=Homo sapiens GN=CFHR1 PE=1 SV=2	92	0.547717		Q03591	38 kDa	8
44	Ig gamma-2 chain C region OS=Homo sapiens GN=IGHG2 PE=1 SV=2	91	0.541763		P01859	36 kDa	7
45	Heparin cofactor 2 OS=Homo sapiens GN=SERPIND1 PE=1 SV=3	84	0.500089		P05546	57 kDa	16
46	Complement C1q subcomponent subunit B OS=Homo sapiens GN=C1QB PE=1 SV=1	78	0.464369		D6R934 (+1)	26 kDa	14
47	Ig alpha-1 chain C region OS=Homo sapiens GN=IGHA1 PE=1 SV=2	78	0.464369		P01876	38 kDa	17
48	Ceruloplasmin OS=Homo sapiens GN=CP PE=1 SV=1	76	0.452462		P00450	122 kDa	23
49	Complement factor H-related protein 5 OS=Homo sapiens GN=CFHR5 PE=1 SV=1	76	0.452462		Q9BXR6	64 kDa	27
50	Serotransferrin OS=Homo sapiens GN=TF PE=1 SV=3	72	0.428648		P02787	77 kDa	36
51	Isoform 2 of Apolipoprotein L1 OS=Homo sapiens GN=APOL1	69	0.410788		O14791-2	46 kDa	21
52	Plasma serine protease inhibitor OS=Homo sapiens GN=SERPINA5 PE=1 SV=3	67	0.398881		P05154	46 kDa	16
53	Insulin-like growth factor-binding protein complex acid labile subunit OS=Homo sapiens GN=IGFALS PE=1 SV=1	66	0.392927		P35858 (+1)	66 kDa	19
54	Beta-2-glycoprotein 1 OS=Homo sapiens GN=APOH PE=1 SV=3	62	0.369114		P02749	38 kDa	14
55	Pregnancy zone protein OS=Homo sapiens GN=PZP PE=1 SV=4	62	0.369114		P20742	164 kDa	7
56	Sulfhydryl oxidase 1 OS=Homo sapiens GN=QSOX1 PE=1 SV=3	62	0.369114		O00391	83 kDa	23
57	Properdin OS=Homo sapiens GN=CFP PE=1 SV=2	61	0.36316		P27918	51 kDa	16
58	Complement C1q subcomponent subunit C OS=Homo sapiens GN=C1QC PE=1 SV=3	60	0.357207		P02747	26 kDa	13
59	Coagulation factor IX OS=Homo sapiens GN=F9 PE=1 SV=2	59	0.351253		P00740	52 kDa	15
60	Complement component C8 beta chain OS=Homo sapiens GN=C8B PE=1 SV=3	59	0.351253		P07358	67 kDa	25
61	Ig lambda-3 chain C regions (Fragment) OS=Homo sapiens GN=IGLC3 PE=1 SV=2	59	0.351253		A0A075B6L0	11 kDa	2
62	Protein SAA2-SAA4 OS=Homo sapiens GN=SAA2-SAA4 PE=4 SV=1	58	0.3453		A0A096LPE2	23 kDa	8
63	Complement component C9 OS=Homo sapiens GN=C9 PE=1 SV=2	57	0.339346		P02748	63 kDa	21
64	Hyaluronan-binding protein 2 OS=Homo sapiens GN=HABP2 PE=1 SV=1	56	0.333393		Q14520	63 kDa	14
65	Immunoglobulin lambda-like polypeptide 5 OS=Homo sapiens GN=IGLL5 PE=1 SV=1	53	0.315533		A0A087WYR4	25 kDa	15
66	Inter-alpha-trypsin inhibitor heavy chain H4 OS=Homo sapiens GN=ITIH4 PE=1 SV=4	53	0.315533		Q14624	103 kDa	20
67	Ig alpha-2 chain C region OS=Homo sapiens GN=IGHA2 PE=1 SV=3	51	0.303626		P01877	37 kDa	4
68	Haptoglobin-related protein OS=Homo sapiens GN=HPR PE=2 SV=2	50	0.297672		P00739 (+1)	39 kDa	23
69	Alpha-2-antiplasmin OS=Homo sapiens GN=SERPINF2 PE=1 SV=3	49	0.291719		P08697	55 kDa	15
70	Haptoglobin OS=Homo sapiens GN=HP PE=1 SV=4	49	0.291719		H0Y300	49 kDa	11
71	Complement component C6 OS=Homo sapiens GN=C6 PE=1 SV=3	47	0.279812		P13671	105 kDa	21
72	Carboxypeptidase N catalytic chain OS=Homo sapiens GN=CPN1 PE=1 SV=1	44	0.261952		P15169	52 kDa	14
73	Apolipoprotein(a) OS=Homo sapiens GN=LPA PE=1 SV=1	41	0.244091		P08519	501 kDa	18
74	Fibronectin OS=Homo sapiens GN=FN1 PE=1 SV=4	41	0.244091		P02751 (+5)	263 kDa	27
75	Isoform 2 of Clusterin OS=Homo sapiens GN=CLU	41	0.244091		P10909-2	58 kDa	15
76	Coagulation factor X OS=Homo sapiens GN=F10 PE=1 SV=2	38	0.226231		P00742	55 kDa	12
77	Complement factor H-related protein 2 OS=Homo sapiens GN=CFHR2 PE=1 SV=1	37	0.220277		P36980 (+1)	31 kDa	3
78	Hepatocyte growth factor-like protein OS=Homo sapiens GN=MST1 PE=1 SV=1	37	0.220277		G3XAK1 (+1)	82 kDa	19
79	Mannan-binding lectin serine protease 1 OS=Homo sapiens GN=MASP1 PE=1 SV=3	37	0.220277		P48740	79 kDa	14
80	Transthyretin OS=Homo sapiens GN=TTR PE=1 SV=1	37	0.220277		A0A087WV45	15 kDa	10
81	Selenoprotein P OS=Homo sapiens GN=SEPP1 PE=1 SV=3	34	0.202417		P49908	43 kDa	8
82	Thrombospondin-1 OS=Homo sapiens GN=THBS1 PE=1 SV=2	34	0.202417		P07996	129 kDa	23
83	78 kDa glucose-regulated protein OS=Homo sapiens GN=HSPA5 PE=1 SV=2	33	0.196464		P11021	72 kDa	15
84	Complement component C8 alpha chain OS=Homo sapiens GN=C8A PE=1 SV=2	33	0.196464		P07357	65 kDa	16
85	CD5 antigen-like OS=Homo sapiens GN=CD5L PE=1 SV=1	31	0.184557		O43866	38 kDa	12
86	Lactotransferrin (Fragment) OS=Homo sapiens GN=LTF PE=1 SV=1	31	0.184557		E7EQB2	77 kDa	26
87	Apolipoprotein C-I (Fragment) OS=Homo sapiens GN=APOC1 PE=1 SV=1	30	0.178603		K7ERI9 (+1)	9 kDa	10
88	Complement component C7 OS=Homo sapiens GN=C7 PE=1 SV=2	30	0.178603		P10643	94 kDa	21
89	Complement factor D OS=Homo sapiens GN=CFD PE=1 SV=1	30	0.178603		K7ERG9 (+1)	28 kDa	13
90	Ig alpha-2 chain C region (Fragment) OS=Homo sapiens GN=IGHA2 PE=1 SV=1	30	0.178603		A0A075B6N7	37 kDa	2
91	Kallistatin OS=Homo sapiens GN=SERPINA4 PE=1 SV=3	30	0.178603		P29622	49 kDa	17
92	Protein AMBP OS=Homo sapiens GN=AMBP PE=1 SV=1	29	0.17265		P02760	39 kDa	12
93	Complement factor H-related protein 3 OS=Homo sapiens GN=CFHR3 PE=1 SV=2	28	0.166696		Q02985	37 kDa	5
94	Isoform 2 of Mannan-binding lectin serine protease 1 OS=Homo sapiens GN=MASP1	28	0.166696		P48740-2	82 kDa	2
95	Ig delta chain C region (Fragment) OS=Homo sapiens GN=IGHD PE=1 SV=1	27	0.160743		A0A0A0MS09	48 kDa	11
96	Vitamin K-dependent protein C OS=Homo sapiens GN=PROC PE=1 SV=1	26	0.15479		E7END6 (+2)	55 kDa	12
97	Cartilage acidic protein 1 OS=Homo sapiens GN=CRTAC1 PE=1 SV=1	25	0.148836		A0A0C4DFP6 (+2)	70 kDa	16
98	Fibrinogen gamma chain OS=Homo sapiens GN=FGG PE=1 SV=3	25	0.148836		P02679 (+1)	52 kDa	14
99	Ig kappa chain V-III region HAH OS=Homo sapiens PE=2 SV=1	25	0.148836		P18135	14 kDa	9
100	Isoform F of Proteoglycan 4 OS=Homo sapiens GN=PRG4	25	0.148836		Q92954-6	146 kDa	11
101	Protein IGHV3-74 (Fragment) OS=Homo sapiens GN=IGHV3-74 PE=1 SV=1	25	0.148836		A0A0B4J1X5	13 kDa	2
102	Tetranectin OS=Homo sapiens GN=CLEC3B PE=1 SV=1	25	0.148836		E9PHK0	18 kDa	12
103	Fibrinogen beta chain OS=Homo sapiens GN=FGB PE=1 SV=2	24	0.142883		P02675	56 kDa	15
104	Hepatocyte growth factor activator OS=Homo sapiens GN=HGFAC PE=1 SV=1	24	0.142883		D6RAR4 (+1)	71 kDa	8
105	Dermcidin OS=Homo sapiens GN=DCD PE=1 SV=2	23	0.136929		P81605	11 kDa	5
106	Procollagen C-endopeptidase enhancer 1 OS=Homo sapiens GN=PCOLCE PE=1 SV=2	23	0.136929		Q15113	48 kDa	11
107	Serum paraoxonase/arylesterase 1 OS=Homo sapiens GN=PON1 PE=1 SV=3	22	0.130976		P27169	40 kDa	9
108	Alpha-2-HS-glycoprotein OS=Homo sapiens GN=AHSG PE=1 SV=1	21	0.125022		P02765	39 kDa	8
109	Complement C1q subcomponent subunit A OS=Homo sapiens GN=C1QA PE=1 SV=2	21	0.125022		P02745	26 kDa	9
110	Vitamin D-binding protein OS=Homo sapiens GN=GC PE=1 SV=1	21	0.125022		D6RF35	53 kDa	2
111	Hemoglobin subunit beta OS=Homo sapiens GN=HBB PE=1 SV=2	20	0.119069		P68871	16 kDa	10
112	Protein Z-dependent protease inhibitor OS=Homo sapiens GN=SERPINA10 PE=1 SV=1	20	0.119069		G3V2W1 (+1)	55 kDa	9
113	Vitamin D-binding protein OS=Homo sapiens GN=GC PE=1 SV=1	20	0.119069		P02774 (+1)	53 kDa	13
114	Apolipoprotein A-II OS=Homo sapiens GN=APOA2 PE=1 SV=1	19	0.113115		V9GYM3	15 kDa	4
115	Complement factor I OS=Homo sapiens GN=CFI PE=1 SV=1	19	0.113115		E7ETH0	67 kDa	13
116	Isoform 2 of Insulin-like growth factor-binding protein 3 OS=Homo sapiens GN=IGFBP3	19	0.113115		P17936-2	32 kDa	7
117	Inter-alpha-trypsin inhibitor heavy chain H3 OS=Homo sapiens GN=ITIH3 PE=1 SV=2	18	0.107162		Q06033 (+1)	100 kDa	13
118	Isoform 2 of N-acetylmuramoyl-L-alanine amidase OS=Homo sapiens GN=PGLYRP2	18	0.107162		Q96PD5-2	68 kDa	9
119	Protein IGHV3-72 OS=Homo sapiens GN=IGHV3-72 PE=1 SV=1	18	0.107162		A0A087WW89	11 kDa	4
120	Apolipoprotein D (Fragment) OS=Homo sapiens GN=APOD PE=1 SV=1	17	0.101209		C9JF17 (+1)	24 kDa	6
121	Complement component C8 gamma chain OS=Homo sapiens GN=C8G PE=1 SV=3	17	0.101209		P07360	22 kDa	10
122	Isoform 2 of C4b-binding protein beta chain OS=Homo sapiens GN=C4BPB	17	0.101209		P20851-2	28 kDa	8
123	Fibrinogen alpha chain OS=Homo sapiens GN=FGA PE=1 SV=2	16	0.0952551		P02671	95 kDa	8
124	Fibulin-1 OS=Homo sapiens GN=FBLN1 PE=1 SV=4	16	0.0952551		P23142	77 kDa	12
125	Lipopolysaccharide-binding protein OS=Homo sapiens GN=LBP PE=1 SV=3	16	0.0952551		P18428	53 kDa	9
126	Prenylcysteine oxidase 1 OS=Homo sapiens GN=PCYOX1 PE=1 SV=3	16	0.0952551		Q9UHG3	57 kDa	8
127	Alpha-1-antichymotrypsin OS=Homo sapiens GN=SERPINA3 PE=1 SV=2	15	0.0893017		P01011	48 kDa	8
128	Hemoglobin subunit alpha OS=Homo sapiens GN=HBA1 PE=1 SV=2	15	0.0893017		P69905	15 kDa	7
129	Hemopexin OS=Homo sapiens GN=HPX PE=1 SV=2	14	0.0833482		P02790	52 kDa	8
130	Apolipoprotein M OS=Homo sapiens GN=APOM PE=1 SV=2	13	0.0773948		O95445	21 kDa	7
131	Cathelicidin antimicrobial peptide OS=Homo sapiens GN=CAMP PE=1 SV=1	13	0.0773948		J3KNB4	20 kDa	8
132	IgGFc-binding protein OS=Homo sapiens GN=FCGBP PE=1 SV=1	13	0.0773948		A0A087WXI2 (+1)	445 kDa	11
133	Protein IGHV5-51 (Fragment) OS=Homo sapiens GN=IGHV5-51 PE=1 SV=1	13	0.0773948		A0A0C4DH38	13 kDa	5
134	Transforming growth factor-beta-induced protein ig-h3 OS=Homo sapiens GN=TGFBI PE=1 SV=1	13	0.0773948		Q15582	75 kDa	11
135	Trypsin-1 OS=Homo sapiens GN=PRSS1 PE=1 SV=1	13	0.0773948		P07477	27 kDa	2
136	Apolipoprotein C-IV OS=Homo sapiens GN=APOC4 PE=1 SV=1	12	0.0714413		P55056	15 kDa	4
137	Heat shock cognate 71 kDa protein OS=Homo sapiens GN=HSPA8 PE=1 SV=1	12	0.0714413		E9PKE3 (+1)	69 kDa	3
138	Isoform 2 of Calsyntenin-1 OS=Homo sapiens GN=CLSTN1	12	0.0714413		O94985-2	109 kDa	9
139	Isoform 2 of Ficolin-3 OS=Homo sapiens GN=FCN3	12	0.0714413		O75636-2	32 kDa	9
140	Phosphatidylinositol-glycan-specific phospholipase D OS=Homo sapiens GN=GPLD1 PE=1 SV=3	12	0.0714413		P80108	92 kDa	9
141	Pyruvate kinase PKM OS=Homo sapiens GN=PKM PE=1 SV=4	12	0.0714413		P14618	58 kDa	10
142	Secreted phosphoprotein 24 OS=Homo sapiens GN=SPP2 PE=1 SV=1	12	0.0714413		Q13103	24 kDa	5
143	Serum amyloid P-component OS=Homo sapiens GN=APCS PE=1 SV=2	12	0.0714413		P02743	25 kDa	8
144	Amyloid beta A4 protein OS=Homo sapiens GN=APP PE=1 SV=1	11	0.0654879		A0A0A0MRG2 (+2)	75 kDa	2
145	Desmoglein-1 OS=Homo sapiens GN=DSG1 PE=1 SV=2	11	0.0654879		Q02413	114 kDa	6
146	Ig heavy chain V-III region BUT OS=Homo sapiens PE=1 SV=1	11	0.0654879		P01767	12 kDa	3
147	Keratinocyte proline-rich protein OS=Homo sapiens GN=KPRP PE=1 SV=1	11	0.0654879		Q5T749	64 kDa	5
148	Apolipoprotein C-III OS=Homo sapiens GN=APOC3 PE=1 SV=1	10	0.0595344		B0YIW2 (+1)	13 kDa	3
149	Carboxypeptidase N subunit 2 OS=Homo sapiens GN=CPN2 PE=1 SV=3	10	0.0595344		P22792	61 kDa	8
150	Ig heavy chain V-III region WEA OS=Homo sapiens PE=1 SV=1	10	0.0595344		P01763	12 kDa	2
151	Ig kappa chain V-I region Scw OS=Homo sapiens PE=1 SV=1	10	0.0595344		P01609	12 kDa	2
152	Ig kappa chain V-III region B6 OS=Homo sapiens PE=1 SV=1	10	0.0595344		P01619	12 kDa	3
153	Ig kappa chain V-IV region Len OS=Homo sapiens PE=1 SV=2	10	0.0595344		P01625	13 kDa	4
154	Protein IGKV1-39 (Fragment) OS=Homo sapiens GN=IGKV1-39 PE=1 SV=1	10	0.0595344		A0A0B4J1Z7 (+1)	13 kDa	2
155	Suprabasin OS=Homo sapiens GN=SBSN PE=1 SV=2	10	0.0595344		Q6UWP8	61 kDa	8
156	Actin, cytoplasmic 1 OS=Homo sapiens GN=ACTB PE=1 SV=1	9	0.053581		P60709 (+1)	42 kDa	3
157	Angiogenin OS=Homo sapiens GN=ANG PE=1 SV=1	9	0.053581		P03950	17 kDa	6
158	Angiopoietin-related protein 3 OS=Homo sapiens GN=ANGPTL3 PE=1 SV=1	9	0.053581		Q9Y5C1	54 kDa	7
159	Multiple inositol polyphosphate phosphatase 1 OS=Homo sapiens GN=MINPP1 PE=1 SV=1	9	0.053581		Q9UNW1	55 kDa	8
160	Phospholipid transfer protein OS=Homo sapiens GN=PLTP PE=1 SV=1	9	0.053581		P55058	55 kDa	7
161	Pigment epithelium-derived factor OS=Homo sapiens GN=SERPINF1 PE=1 SV=4	9	0.053581		P36955	46 kDa	8
162	Protein S100-A8 OS=Homo sapiens GN=S100A8 PE=1 SV=1	9	0.053581		P05109	11 kDa	4
163	Retinoic acid receptor responder protein 2 OS=Homo sapiens GN=RARRES2 PE=1 SV=1	9	0.053581		Q99969	19 kDa	3
164	Alpha-1B-glycoprotein OS=Homo sapiens GN=A1BG PE=1 SV=4	8	0.0476276		P04217	54 kDa	6
165	Glutathione peroxidase OS=Homo sapiens GN=GPX3 PE=1 SV=1	8	0.0476276		A0A087X1J7 (+1)	25 kDa	4
166	Glyceraldehyde-3-phosphate dehydrogenase OS=Homo sapiens GN=GAPDH PE=1 SV=3	8	0.0476276		P04406	36 kDa	4
167	Isoform B of Coagulation factor VII OS=Homo sapiens GN=F7	8	0.0476276		P08709-2	49 kDa	5
168	Platelet-activating factor acetylhydrolase OS=Homo sapiens GN=PLA2G7 PE=1 SV=1	8	0.0476276		Q13093	50 kDa	7
169	Protein IGLV3-25 (Fragment) OS=Homo sapiens GN=IGLV3-25 PE=1 SV=2	8	0.0476276		A0A075B6J4	12 kDa	4
170	Alpha-enolase OS=Homo sapiens GN=ENO1 PE=1 SV=2	7	0.0416741		P06733	47 kDa	5
171	Apolipoprotein A-V OS=Homo sapiens GN=APOA5 PE=1 SV=1	7	0.0416741		Q6Q788	41 kDa	7
172	Desmoplakin OS=Homo sapiens GN=DSP PE=1 SV=3	7	0.0416741		P15924	332 kDa	4
173	Exostosin-2 OS=Homo sapiens GN=EXT2 PE=1 SV=1	7	0.0416741		Q93063 (+1)	82 kDa	6
174	Filaggrin-2 OS=Homo sapiens GN=FLG2 PE=1 SV=1	7	0.0416741		Q5D862	248 kDa	2
175	Filamin-A OS=Homo sapiens GN=FLNA PE=1 SV=4	7	0.0416741		P21333 (+2)	281 kDa	7
176	Isoform 3 of L-lactate dehydrogenase A chain OS=Homo sapiens GN=LDHA	7	0.0416741		P00338-3	40 kDa	6
177	Adipocyte plasma membrane-associated protein OS=Homo sapiens GN=APMAP PE=1 SV=2	6	0.0357207		Q9HDC9	46 kDa	5
178	Afamin OS=Homo sapiens GN=AFM PE=1 SV=1	6	0.0357207		P43652	69 kDa	6
179	Alpha-1-acid glycoprotein 2 OS=Homo sapiens GN=ORM2 PE=1 SV=2	6	0.0357207		P19652	24 kDa	4
180	Cartilage oligomeric matrix protein OS=Homo sapiens GN=COMP PE=1 SV=1	6	0.0357207		G3XAP6 (+1)	80 kDa	6
181	Coagulation factor VIII OS=Homo sapiens GN=F8 PE=1 SV=1	6	0.0357207		P00451	267 kDa	4
182	Flavin reductase (NADPH) OS=Homo sapiens GN=BLVRB PE=1 SV=3	6	0.0357207		P30043	22 kDa	5
183	Fructose-bisphosphate aldolase OS=Homo sapiens GN=ALDOA PE=1 SV=1	6	0.0357207		J3KPS3 (+1)	40 kDa	6
184	Ig kappa chain V-II region TEW OS=Homo sapiens PE=1 SV=1	6	0.0357207		P01617	12 kDa	2
185	Isoform 3 of Collagen alpha-1(XVIII) chain OS=Homo sapiens GN=COL18A1	6	0.0357207		P39060-2	136 kDa	5
186	Junction plakoglobin OS=Homo sapiens GN=JUP PE=1 SV=3	6	0.0357207		P14923	82 kDa	5
187	Moesin OS=Homo sapiens GN=MSN PE=1 SV=3	6	0.0357207		P26038	68 kDa	6
188	Protein APOC4-APOC2 OS=Homo sapiens GN=APOC4-APOC2 PE=4 SV=1	6	0.0357207		K7ER74	20 kDa	2
189	Protein IGKV1-17 (Fragment) OS=Homo sapiens GN=IGKV1-17 PE=1 SV=1	6	0.0357207		A0A0B4J1Z4	13 kDa	3
190	Protein IGLV1-47 (Fragment) OS=Homo sapiens GN=IGLV1-47 PE=1 SV=1	6	0.0357207		A0A075B6I8	12 kDa	3
191	Actin, aortic smooth muscle OS=Homo sapiens GN=ACTA2 PE=1 SV=1	5	0.0297672		P62736 (+1)	42 kDa	4
192	Alpha-synuclein OS=Homo sapiens GN=SNCA PE=1 SV=1	5	0.0297672		E7EPV7 (+2)	12 kDa	2
193	Angiotensinogen OS=Homo sapiens GN=AGT PE=1 SV=1	5	0.0297672		P01019	53 kDa	5
194	Cathepsin S OS=Homo sapiens GN=CTSS PE=1 SV=3	5	0.0297672		P25774	37 kDa	5
195	Creatine kinase M-type OS=Homo sapiens GN=CKM PE=1 SV=2	5	0.0297672		P06732	43 kDa	3
196	Ficolin-2 OS=Homo sapiens GN=FCN2 PE=1 SV=2	5	0.0297672		Q15485	34 kDa	5
197	Ig kappa chain V-I region DEE OS=Homo sapiens PE=1 SV=1	5	0.0297672		P01597	12 kDa	3
198	Ig lambda chain V-III region SH OS=Homo sapiens PE=1 SV=1	5	0.0297672		P01714	11 kDa	2
199	Insulin-like growth factor-binding protein 2 OS=Homo sapiens GN=IGFBP2 PE=1 SV=2	5	0.0297672		P18065	35 kDa	5
200	Lysozyme C OS=Homo sapiens GN=LYZ PE=1 SV=1	5	0.0297672		P61626	17 kDa	5
201	Mannan-binding lectin serine protease 2 OS=Homo sapiens GN=MASP2 PE=1 SV=4	5	0.0297672		O00187	76 kDa	4
202	Platelet basic protein OS=Homo sapiens GN=PPBP PE=1 SV=3	5	0.0297672		P02775	14 kDa	3
203	Protein IGHV3-15 (Fragment) OS=Homo sapiens GN=IGHV3-15 PE=1 SV=1	5	0.0297672		A0A0B4J1V0	13 kDa	2
204	Protein IGKV2D-29 OS=Homo sapiens GN=IGKV2D-29 PE=1 SV=1	5	0.0297672		A0A087X0P6	11 kDa	3
205	Protein IGLV4-69 (Fragment) OS=Homo sapiens GN=IGLV4-69 PE=1 SV=1	5	0.0297672		A0A075B6H9	13 kDa	3
206	Ribonuclease 4 OS=Homo sapiens GN=RNASE4 PE=1 SV=3	5	0.0297672		P34096	17 kDa	4
207	Zinc-alpha-2-glycoprotein OS=Homo sapiens GN=AZGP1 PE=1 SV=2	5	0.0297672		P25311	34 kDa	2
208	Bone morphogenetic protein 1 OS=Homo sapiens GN=BMP1 PE=1 SV=2	4	0.0238138		P13497	111 kDa	4
209	Catalase OS=Homo sapiens GN=CAT PE=1 SV=3	4	0.0238138		P04040	60 kDa	2
210	HCG2043239 (Fragment) OS=Homo sapiens GN=IGLV3-9 PE=1 SV=1	4	0.0238138		A0A075B6K5	12 kDa	3
211	Ig heavy chain V-II region NEWM OS=Homo sapiens PE=1 SV=1	4	0.0238138		P01825	13 kDa	2
212	L-lactate dehydrogenase B chain OS=Homo sapiens GN=LDHB PE=1 SV=2	4	0.0238138		P07195	37 kDa	2
213	Phosphoglycerate kinase 1 OS=Homo sapiens GN=PGK1 PE=1 SV=3	4	0.0238138		P00558	45 kDa	4
214	Protein IGHV3-49 OS=Homo sapiens GN=IGHV3-49 PE=1 SV=1	4	0.0238138		A0A087WU91 (+1)	12 kDa	2
215	Protein IGHV3-73 (Fragment) OS=Homo sapiens GN=IGHV3-73 PE=1 SV=1	4	0.0238138		A0A0B4J1V6	13 kDa	2
216	Protein S100-A9 OS=Homo sapiens GN=S100A9 PE=1 SV=1	4	0.0238138		P06702	13 kDa	2
217	C-reactive protein OS=Homo sapiens GN=CRP PE=1 SV=1	3	0.0178603		P02741	25 kDa	3
218	Calpain-1 catalytic subunit OS=Homo sapiens GN=CAPN1 PE=1 SV=1	3	0.0178603		P07384	82 kDa	3
219	Caspase-14 OS=Homo sapiens GN=CASP14 PE=1 SV=2	3	0.0178603		P31944	28 kDa	3
220	Coagulation factor XIII A chain OS=Homo sapiens GN=F13A1 PE=1 SV=4	3	0.0178603		P00488	83 kDa	3
221	Corticosteroid-binding globulin OS=Homo sapiens GN=SERPINA6 PE=1 SV=1	3	0.0178603		P08185	45 kDa	3
222	Endoplasmin OS=Homo sapiens GN=HSP90B1 PE=1 SV=1	3	0.0178603		P14625	92 kDa	3
223	Ficolin-1 OS=Homo sapiens GN=FCN1 PE=1 SV=2	3	0.0178603		O00602	35 kDa	3
224	HLA class I histocompatibility antigen, A-30 alpha chain OS=Homo sapiens GN=HLA-A PE=1 SV=2	3	0.0178603		P16188	41 kDa	3
225	Ig kappa chain V-I region HK102 (Fragment) OS=Homo sapiens GN=IGKV1-5 PE=4 SV=1	3	0.0178603		P01602	13 kDa	2
226	Isoform 2 of Dermokine OS=Homo sapiens GN=DMKN	3	0.0178603		Q6E0U4-2	47 kDa	3
227	Mannose-binding protein C OS=Homo sapiens GN=MBL2 PE=1 SV=2	3	0.0178603		P11226	26 kDa	3
228	Neuropilin-1 OS=Homo sapiens GN=NRP1 PE=1 SV=3	3	0.0178603		O14786	103 kDa	2
229	Peptidyl-prolyl cis-trans isomerase B OS=Homo sapiens GN=PPIB PE=1 SV=2	3	0.0178603		P23284	24 kDa	3
230	Platelet factor 4 OS=Homo sapiens GN=PF4 PE=1 SV=2	3	0.0178603		P02776	11 kDa	2
231	Proprotein convertase subtilisin/kexin type 9 OS=Homo sapiens GN=PCSK9 PE=1 SV=3	3	0.0178603		Q8NBP7	74 kDa	3
232	Protein IGLV2-14 (Fragment) OS=Homo sapiens GN=IGLV2-14 PE=1 SV=1	3	0.0178603		A0A075B6K1	13 kDa	2
233	Protein IGLV3-27 (Fragment) OS=Homo sapiens GN=IGLV3-27 PE=1 SV=1	3	0.0178603		A0A075B6J3	12 kDa	2
234	Protein IGLV4-60 (Fragment) OS=Homo sapiens GN=IGLV4-60 PE=1 SV=1	3	0.0178603		A0A075B6I1	13 kDa	3
235	Protein IGLV7-43 (Fragment) OS=Homo sapiens GN=IGLV7-43 PE=4 SV=1	3	0.0178603		A0A0B4J1U2 (+1)	12 kDa	2
236	Protein IGLV8-61 (Fragment) OS=Homo sapiens GN=IGLV8-61 PE=1 SV=4	3	0.0178603		A0A075B6I0	13 kDa	2
237	Serpin A11 OS=Homo sapiens GN=SERPINA11 PE=2 SV=2	3	0.0178603		Q86U17	47 kDa	2
238	Serum amyloid A-1 protein OS=Homo sapiens GN=SAA1 PE=1 SV=1	3	0.0178603		P0DJI8	14 kDa	2
239	Transcobalamin-2 OS=Homo sapiens GN=TCN2 PE=1 SV=1	3	0.0178603		B5MBX2 (+2)	47 kDa	2
240	Alcohol dehydrogenase 1B OS=Homo sapiens GN=ADH1B PE=1 SV=2	2	0.0119069		P00325	40 kDa	2
241	Cadherin-1 OS=Homo sapiens GN=CDH1 PE=1 SV=1	2	0.0119069		A0A087WXI5	100 kDa	2
242	Cartilage intermediate layer protein 1 OS=Homo sapiens GN=CILP PE=1 SV=4	2	0.0119069		O75339	133 kDa	2
243	Chondroadherin OS=Homo sapiens GN=CHAD PE=2 SV=2	2	0.0119069		O15335	40 kDa	2
244	Cofilin-1 OS=Homo sapiens GN=CFL1 PE=1 SV=3	2	0.0119069		P23528	19 kDa	2
245	Collectin-10 OS=Homo sapiens GN=COLEC10 PE=2 SV=2	2	0.0119069		Q9Y6Z7	31 kDa	2
246	Extracellular matrix protein 1 OS=Homo sapiens GN=ECM1 PE=1 SV=2	2	0.0119069		Q16610 (+1)	61 kDa	2
247	Ig heavy chain V-II region WAH OS=Homo sapiens PE=1 SV=1	2	0.0119069		P01824	14 kDa	2
248	Ig lambda chain V-I region NEW OS=Homo sapiens PE=1 SV=1	2	0.0119069		P01701	11 kDa	2
249	Insulin-like growth factor I OS=Homo sapiens GN=IGF1 PE=1 SV=1	2	0.0119069		P05019 (+4)	22 kDa	2
250	Isoform 3 of Complement C1q tumor necrosis factor-related protein 3 OS=Homo sapiens GN=C1QTNF3	2	0.0119069		Q9BXJ4-3	35 kDa	2
251	Isoform 3 of Insulin-like growth factor II OS=Homo sapiens GN=IGF2	2	0.0119069		P01344-3	26 kDa	2
252	Isoform 3 of Olfactomedin-like protein 3 OS=Homo sapiens GN=OLFML3	2	0.0119069		Q9NRN5-3	32 kDa	2
253	Multimerin-2 OS=Homo sapiens GN=MMRN2 PE=1 SV=2	2	0.0119069		Q9H8L6	104 kDa	2
254	Neutrophil defensin 1 OS=Homo sapiens GN=DEFA1 PE=1 SV=1	2	0.0119069		P59665 (+1)	10 kDa	2
255	Neutrophil gelatinase-associated lipocalin OS=Homo sapiens GN=LCN2 PE=1 SV=2	2	0.0119069		P80188 (+2)	23 kDa	2
256	Peptidyl-prolyl cis-trans isomerase C OS=Homo sapiens GN=PPIC PE=1 SV=1	2	0.0119069		P45877	23 kDa	2
257	Protein IGKV2-24 (Fragment) OS=Homo sapiens GN=IGKV2-24 PE=1 SV=1	2	0.0119069		A0A0C4DH68	13 kDa	2
258	Protein JCHAIN (Fragment) OS=Homo sapiens GN=JCHAIN PE=1 SV=5	2	0.0119069		D6RD17 (+1)	18 kDa	2
259	Sushi domain-containing protein 1 OS=Homo sapiens GN=SUSD1 PE=1 SV=1	2	0.0119069		F8WAQ1-DECOY (+1)	?	2
260	Sushi, nidogen and EGF-like domain-containing protein 1 OS=Homo sapiens GN=SNED1 PE=2 SV=2	2	0.0119069		Q8TER0 (+3)	152 kDa	2
261	Tumor necrosis factor alpha-induced protein 8-like protein 1 OS=Homo sapiens GN=TNFAIP8L1 PE=1 SV=2	2	0.0119069		Q8WVP5	21 kDa	2

## Sheet: B20 diluted 5 times
Number	Identified Proteins	Total Spectrum Count B20 diluted 5 times	Relative abundance (%)	Sum	Accession Number	Molecular Weight	Peptide count
1	Apolipoprotein B-100 OS=Homo sapiens GN=APOB PE=1 SV=2	1032	9.07572		P04114	516 kDa	199
2	Complement C3 OS=Homo sapiens GN=C3 PE=1 SV=2	858	7.54551	11371	P01024	187 kDa	122
3	Serum albumin OS=Homo sapiens GN=ALB PE=1 SV=2	512	4.50268		P02768	69 kDa	65
4	Complement C4-A OS=Homo sapiens GN=C4A PE=1 SV=2	460	4.04538		P0C0L4	193 kDa	4
5	Complement C4-B OS=Homo sapiens GN=C4B PE=1 SV=2	457	4.019		P0C0L5	193 kDa	79
6	Alpha-2-macroglobulin OS=Homo sapiens GN=A2M PE=1 SV=3	373	3.28027		P01023	163 kDa	62
7	Complement factor H OS=Homo sapiens GN=CFH PE=1 SV=4	373	3.28027		P08603	139 kDa	68
8	Plasminogen OS=Homo sapiens GN=PLG PE=1 SV=2	305	2.68226		P00747	91 kDa	54
9	C4b-binding protein alpha chain OS=Homo sapiens GN=C4BPA PE=1 SV=2	285	2.50638		P04003	67 kDa	41
10	Antithrombin-III OS=Homo sapiens GN=SERPINC1 PE=1 SV=1	284	2.49758		P01008	53 kDa	35
11	Prothrombin OS=Homo sapiens GN=F2 PE=1 SV=2	269	2.36567		P00734	70 kDa	45
12	Apolipoprotein A-I OS=Homo sapiens GN=APOA1 PE=1 SV=1	263	2.3129		P02647	31 kDa	38
13	Isoform LMW of Kininogen-1 OS=Homo sapiens GN=KNG1	172	1.51262		P01042-2	48 kDa	2
14	Kininogen-1 OS=Homo sapiens GN=KNG1 PE=1 SV=2	172	1.51262		P01042	72 kDa	40
15	Apolipoprotein E OS=Homo sapiens GN=APOE PE=1 SV=1	166	1.45985		P02649	36 kDa	30
16	Coagulation factor V OS=Homo sapiens GN=F5 PE=1 SV=1	159	1.39829		A0A0A0MRJ7 (+1)	252 kDa	46
17	Plasma kallikrein (Fragment) OS=Homo sapiens GN=KLKB1 PE=1 SV=1	159	1.39829		H0YAC1	77 kDa	33
18	Histidine-rich glycoprotein OS=Homo sapiens GN=HRG PE=1 SV=1	158	1.3895		P04196	60 kDa	29
19	Hornerin OS=Homo sapiens GN=HRNR PE=1 SV=2	147	1.29276		Q86YZ3	282 kDa	25
20	Vitronectin OS=Homo sapiens GN=VTN PE=1 SV=1	142	1.24879		P04004	54 kDa	29
21	Coagulation factor XII OS=Homo sapiens GN=F12 PE=1 SV=3	136	1.19602		P00748	68 kDa	30
22	Inter-alpha-trypsin inhibitor heavy chain H2 OS=Homo sapiens GN=ITIH2 PE=1 SV=1	131	1.15205		Q5T985	105 kDa	26
23	Ig mu chain C region OS=Homo sapiens GN=IGHM PE=1 SV=1	121	1.06411		A0A087X2C0	64 kDa	21
24	Inter-alpha-trypsin inhibitor heavy chain H1 OS=Homo sapiens GN=ITIH1 PE=1 SV=3	108	0.949785		P19827	101 kDa	24
25	Uncharacterized protein OS=Homo sapiens PE=1 SV=1	106	0.932196		B4E1Z4	141 kDa	27
26	Plasma protease C1 inhibitor OS=Homo sapiens GN=SERPING1 PE=1 SV=2	102	0.897019		P05155 (+1)	55 kDa	17
27	Complement C5 OS=Homo sapiens GN=C5 PE=1 SV=4	101	0.888224		P01031	188 kDa	38
28	Gelsolin OS=Homo sapiens GN=GSN PE=1 SV=1	99	0.870636		P06396	86 kDa	29
29	Complement C1r subcomponent OS=Homo sapiens GN=C1R PE=1 SV=1	92	0.809076		B4DPQ0	82 kDa	26
30	Alpha-1-antitrypsin OS=Homo sapiens GN=SERPINA1 PE=1 SV=3	89	0.782693		P01009	47 kDa	23
31	Coagulation factor XI OS=Homo sapiens GN=F11 PE=1 SV=1	89	0.782693		P03951	70 kDa	23
32	Ig gamma-1 chain C region OS=Homo sapiens GN=IGHG1 PE=1 SV=1	87	0.765104		A0A087WV47	51 kDa	19
33	Apolipoprotein A-IV OS=Homo sapiens GN=APOA4 PE=1 SV=3	83	0.729927		P06727	45 kDa	25
34	Ig gamma-3 chain C region OS=Homo sapiens GN=IGHG3 PE=1 SV=1	80	0.703544		A0A087WXL8	57 kDa	7
35	Ig gamma-1 chain C region OS=Homo sapiens GN=IGHG1 PE=1 SV=1	78	0.685956		A0A087WYC5	52 kDa	2
36	Heparin cofactor 2 OS=Homo sapiens GN=SERPIND1 PE=1 SV=3	75	0.659573		P05546	57 kDa	15
37	Vitamin K-dependent protein S OS=Homo sapiens GN=PROS1 PE=1 SV=1	75	0.659573		P07225	75 kDa	17
38	Complement C1s subcomponent OS=Homo sapiens GN=C1S PE=1 SV=1	72	0.63319		P09871	77 kDa	22
39	Carboxypeptidase B2 OS=Homo sapiens GN=CPB2 PE=1 SV=2	68	0.598012		Q96IY4	48 kDa	15
40	Desmoplakin OS=Homo sapiens GN=DSP PE=1 SV=3	57	0.501275		P15924	332 kDa	21
41	Protein IGKV3-11 OS=Homo sapiens GN=IGKV3-11 PE=4 SV=1	56	0.492481		A0A087WZW8	26 kDa	15
42	Complement factor H-related protein 1 OS=Homo sapiens GN=CFHR1 PE=1 SV=2	55	0.483687		Q03591	38 kDa	6
43	Serotransferrin OS=Homo sapiens GN=TF PE=1 SV=3	55	0.483687		P02787	77 kDa	28
44	Ig kappa chain C region OS=Homo sapiens GN=IGKC PE=1 SV=1	54	0.474892		A0A087X130	25 kDa	2
45	Complement component C8 beta chain OS=Homo sapiens GN=C8B PE=1 SV=3	50	0.439715		P07358	67 kDa	21
46	Desmoglein-1 OS=Homo sapiens GN=DSG1 PE=1 SV=2	50	0.439715		Q02413	114 kDa	15
47	Ig alpha-1 chain C region OS=Homo sapiens GN=IGHA1 PE=1 SV=2	50	0.439715		P01876	38 kDa	13
48	Beta-2-glycoprotein 1 OS=Homo sapiens GN=APOH PE=1 SV=3	48	0.422126		P02749	38 kDa	14
49	Ig gamma-2 chain C region OS=Homo sapiens GN=IGHG2 PE=1 SV=2	45	0.395744		P01859	36 kDa	4
50	Sulfhydryl oxidase 1 OS=Homo sapiens GN=QSOX1 PE=1 SV=3	44	0.386949		O00391	83 kDa	20
51	Plasma serine protease inhibitor OS=Homo sapiens GN=SERPINA5 PE=1 SV=3	43	0.378155		P05154	46 kDa	14
52	Properdin OS=Homo sapiens GN=CFP PE=1 SV=2	43	0.378155		P27918	51 kDa	14
53	Ig lambda-3 chain C regions (Fragment) OS=Homo sapiens GN=IGLC3 PE=1 SV=2	42	0.369361		A0A075B6L0	11 kDa	2
54	Keratinocyte proline-rich protein OS=Homo sapiens GN=KPRP PE=1 SV=1	42	0.369361		Q5T749	64 kDa	11
55	Apolipoprotein(a) OS=Homo sapiens GN=LPA PE=1 SV=1	40	0.351772		P08519	501 kDa	19
56	Ceruloplasmin OS=Homo sapiens GN=CP PE=1 SV=1	40	0.351772		P00450	122 kDa	16
57	Isoform 2 of Apolipoprotein L1 OS=Homo sapiens GN=APOL1	40	0.351772		O14791-2	46 kDa	16
58	Junction plakoglobin OS=Homo sapiens GN=JUP PE=1 SV=3	40	0.351772		P14923	82 kDa	14
59	Coagulation factor IX OS=Homo sapiens GN=F9 PE=1 SV=2	38	0.334183		P00740	52 kDa	9
60	Complement C1q subcomponent subunit B OS=Homo sapiens GN=C1QB PE=1 SV=1	38	0.334183		D6R934 (+1)	26 kDa	7
61	Complement component C9 OS=Homo sapiens GN=C9 PE=1 SV=2	38	0.334183		P02748	63 kDa	17
62	Complement factor H-related protein 5 OS=Homo sapiens GN=CFHR5 PE=1 SV=1	38	0.334183		Q9BXR6	64 kDa	20
63	Insulin-like growth factor-binding protein complex acid labile subunit OS=Homo sapiens GN=IGFALS PE=1 SV=1	36	0.316595		P35858 (+1)	66 kDa	14
64	Complement C1q subcomponent subunit C OS=Homo sapiens GN=C1QC PE=1 SV=3	35	0.307801		P02747	26 kDa	6
65	Fibronectin OS=Homo sapiens GN=FN1 PE=1 SV=4	34	0.299006		P02751 (+5)	263 kDa	26
66	Inter-alpha-trypsin inhibitor heavy chain H4 OS=Homo sapiens GN=ITIH4 PE=1 SV=4	34	0.299006		Q14624	103 kDa	14
67	Ig alpha-2 chain C region OS=Homo sapiens GN=IGHA2 PE=1 SV=3	33	0.290212		P01877	37 kDa	3
68	Protein SAA2-SAA4 OS=Homo sapiens GN=SAA2-SAA4 PE=4 SV=1	33	0.290212		A0A096LPE2	23 kDa	6
69	Immunoglobulin lambda-like polypeptide 5 OS=Homo sapiens GN=IGLL5 PE=1 SV=1	31	0.272623		A0A087WYR4	25 kDa	7
70	Isoform 2 of Clusterin OS=Homo sapiens GN=CLU	31	0.272623		P10909-2	58 kDa	12
71	Complement component C6 OS=Homo sapiens GN=C6 PE=1 SV=3	30	0.263829		P13671	105 kDa	16
72	Alpha-2-antiplasmin OS=Homo sapiens GN=SERPINF2 PE=1 SV=3	29	0.255035		P08697	55 kDa	12
73	Coagulation factor X OS=Homo sapiens GN=F10 PE=1 SV=2	27	0.237446		P00742	55 kDa	12
74	Haptoglobin OS=Homo sapiens GN=HP PE=1 SV=4	26	0.228652		H0Y300	49 kDa	7
75	Hyaluronan-binding protein 2 OS=Homo sapiens GN=HABP2 PE=1 SV=1	26	0.228652		Q14520	63 kDa	11
76	Selenoprotein P OS=Homo sapiens GN=SEPP1 PE=1 SV=3	26	0.228652		P49908	43 kDa	11
77	Complement factor H-related protein 2 OS=Homo sapiens GN=CFHR2 PE=1 SV=1	25	0.219858		P36980 (+1)	31 kDa	3
78	Haptoglobin-related protein OS=Homo sapiens GN=HPR PE=2 SV=2	24	0.211063		P00739 (+1)	39 kDa	14
79	Carboxypeptidase N catalytic chain OS=Homo sapiens GN=CPN1 PE=1 SV=1	22	0.193475		P15169	52 kDa	9
80	Filaggrin-2 OS=Homo sapiens GN=FLG2 PE=1 SV=1	22	0.193475		Q5D862	248 kDa	8
81	Mannan-binding lectin serine protease 1 OS=Homo sapiens GN=MASP1 PE=1 SV=3	22	0.193475		P48740	79 kDa	10
82	78 kDa glucose-regulated protein OS=Homo sapiens GN=HSPA5 PE=1 SV=2	21	0.18468		P11021	72 kDa	10
83	Apolipoprotein C-I (Fragment) OS=Homo sapiens GN=APOC1 PE=1 SV=1	21	0.18468		K7ERI9 (+1)	9 kDa	6
84	Complement component C8 alpha chain OS=Homo sapiens GN=C8A PE=1 SV=2	21	0.18468		P07357	65 kDa	12
85	Trypsin-1 OS=Homo sapiens GN=PRSS1 PE=1 SV=1	21	0.18468		P07477	27 kDa	3
86	Kallistatin OS=Homo sapiens GN=SERPINA4 PE=1 SV=3	20	0.175886		P29622	49 kDa	11
87	Fibrinogen beta chain OS=Homo sapiens GN=FGB PE=1 SV=2	19	0.167092		P02675	56 kDa	11
88	Lactotransferrin (Fragment) OS=Homo sapiens GN=LTF PE=1 SV=1	19	0.167092		E7EQB2	77 kDa	18
89	Caspase-14 OS=Homo sapiens GN=CASP14 PE=1 SV=2	18	0.158297		P31944	28 kDa	7
90	Complement component C7 OS=Homo sapiens GN=C7 PE=1 SV=2	18	0.158297		P10643	94 kDa	17
91	Dermcidin OS=Homo sapiens GN=DCD PE=1 SV=2	18	0.158297		P81605	11 kDa	4
92	Fibrinogen gamma chain OS=Homo sapiens GN=FGG PE=1 SV=3	18	0.158297		P02679 (+1)	52 kDa	12
93	Isoform 2 of Mannan-binding lectin serine protease 1 OS=Homo sapiens GN=MASP1	18	0.158297		P48740-2	82 kDa	2
94	Protein AMBP OS=Homo sapiens GN=AMBP PE=1 SV=1	18	0.158297		P02760	39 kDa	8
95	Protein IGHV3-74 (Fragment) OS=Homo sapiens GN=IGHV3-74 PE=1 SV=1	18	0.158297		A0A0B4J1X5	13 kDa	2
96	Transthyretin OS=Homo sapiens GN=TTR PE=1 SV=1	18	0.158297		A0A087WV45	15 kDa	6
97	Desmocollin-1 OS=Homo sapiens GN=DSC1 PE=1 SV=2	17	0.149503		Q08554	100 kDa	4
98	Isoform F of Proteoglycan 4 OS=Homo sapiens GN=PRG4	17	0.149503		Q92954-6	146 kDa	9
99	Amyloid beta A4 protein OS=Homo sapiens GN=APP PE=1 SV=1	16	0.140709		A0A0A0MRG2 (+2)	75 kDa	2
100	Hepatocyte growth factor activator OS=Homo sapiens GN=HGFAC PE=1 SV=1	16	0.140709		D6RAR4 (+1)	71 kDa	6
101	Isoform 2 of N-acetylmuramoyl-L-alanine amidase OS=Homo sapiens GN=PGLYRP2	16	0.140709		Q96PD5-2	68 kDa	8
102	Protein S100-A8 OS=Homo sapiens GN=S100A8 PE=1 SV=1	16	0.140709		P05109	11 kDa	3
103	Tetranectin OS=Homo sapiens GN=CLEC3B PE=1 SV=1	16	0.140709		E9PHK0	18 kDa	9
104	Vitamin D-binding protein OS=Homo sapiens GN=GC PE=1 SV=1	16	0.140709		P02774 (+1)	53 kDa	10
105	Zinc-alpha-2-glycoprotein OS=Homo sapiens GN=AZGP1 PE=1 SV=2	16	0.140709		P25311	34 kDa	4
106	Alpha-synuclein OS=Homo sapiens GN=SNCA PE=1 SV=1	15	0.131915		E7EPV7 (+2)	12 kDa	4
107	Hepatocyte growth factor-like protein OS=Homo sapiens GN=MST1 PE=1 SV=1	15	0.131915		G3XAK1 (+1)	82 kDa	10
108	Ig delta chain C region (Fragment) OS=Homo sapiens GN=IGHD PE=1 SV=1	15	0.131915		A0A0A0MS09	48 kDa	6
109	Isoform 2 of Insulin-like growth factor-binding protein 3 OS=Homo sapiens GN=IGFBP3	15	0.131915		P17936-2	32 kDa	8
110	Procollagen C-endopeptidase enhancer 1 OS=Homo sapiens GN=PCOLCE PE=1 SV=2	15	0.131915		Q15113	48 kDa	7
111	Serum paraoxonase/arylesterase 1 OS=Homo sapiens GN=PON1 PE=1 SV=3	15	0.131915		P27169	40 kDa	8
112	Alpha-2-HS-glycoprotein OS=Homo sapiens GN=AHSG PE=1 SV=1	14	0.12312		P02765	39 kDa	6
113	Apolipoprotein A-II OS=Homo sapiens GN=APOA2 PE=1 SV=1	14	0.12312		V9GYM3	15 kDa	5
114	Cartilage acidic protein 1 OS=Homo sapiens GN=CRTAC1 PE=1 SV=1	14	0.12312		A0A0C4DFP6 (+2)	70 kDa	12
115	CD5 antigen-like OS=Homo sapiens GN=CD5L PE=1 SV=1	14	0.12312		O43866	38 kDa	9
116	Complement component C8 gamma chain OS=Homo sapiens GN=C8G PE=1 SV=3	14	0.12312		P07360	22 kDa	8
117	Hemoglobin subunit beta OS=Homo sapiens GN=HBB PE=1 SV=2	14	0.12312		P68871	16 kDa	8
118	Isoform 2 of C4b-binding protein beta chain OS=Homo sapiens GN=C4BPB	14	0.12312		P20851-2	28 kDa	9
119	Protein S100-A7 OS=Homo sapiens GN=S100A7 PE=1 SV=4	14	0.12312		P31151	11 kDa	3
120	Annexin A2 OS=Homo sapiens GN=ANXA2 PE=1 SV=2	13	0.114326		P07355 (+1)	39 kDa	6
121	Filaggrin OS=Homo sapiens GN=FLG PE=1 SV=3	13	0.114326		P20930	435 kDa	4
122	Serpin B12 OS=Homo sapiens GN=SERPINB12 PE=1 SV=1	13	0.114326		Q96P63 (+1)	46 kDa	4
123	Thrombospondin-1 OS=Homo sapiens GN=THBS1 PE=1 SV=2	13	0.114326		P07996	129 kDa	10
124	Actin, cytoplasmic 1 OS=Homo sapiens GN=ACTB PE=1 SV=1	12	0.105532		P60709 (+1)	42 kDa	3
125	Ig kappa chain V-III region HAH OS=Homo sapiens PE=2 SV=1	12	0.105532		P18135	14 kDa	4
126	Lipopolysaccharide-binding protein OS=Homo sapiens GN=LBP PE=1 SV=3	12	0.105532		P18428	53 kDa	8
127	Protein IGHV3-72 OS=Homo sapiens GN=IGHV3-72 PE=1 SV=1	12	0.105532		A0A087WW89	11 kDa	3
128	Protein Z-dependent protease inhibitor OS=Homo sapiens GN=SERPINA10 PE=1 SV=1	12	0.105532		G3V2W1 (+1)	55 kDa	6
129	Vitamin K-dependent protein C OS=Homo sapiens GN=PROC PE=1 SV=1	12	0.105532		E7END6 (+2)	55 kDa	6
130	Apolipoprotein D (Fragment) OS=Homo sapiens GN=APOD PE=1 SV=1	11	0.0967373		C9JF17 (+1)	24 kDa	5
131	Catalase OS=Homo sapiens GN=CAT PE=1 SV=3	11	0.0967373		P04040	60 kDa	5
132	Fibulin-1 OS=Homo sapiens GN=FBLN1 PE=1 SV=4	11	0.0967373		P23142	77 kDa	11
133	Serpin B3 OS=Homo sapiens GN=SERPINB3 PE=1 SV=2	11	0.0967373		P29508	45 kDa	6
134	Complement C1q subcomponent subunit A OS=Homo sapiens GN=C1QA PE=1 SV=2	10	0.087943		P02745	26 kDa	4
135	Complement factor D OS=Homo sapiens GN=CFD PE=1 SV=1	10	0.087943		K7ERG9 (+1)	28 kDa	6
136	Fatty acid-binding protein, epidermal OS=Homo sapiens GN=FABP5 PE=1 SV=3	10	0.087943		Q01469	15 kDa	4
137	Plakophilin-1 OS=Homo sapiens GN=PKP1 PE=1 SV=2	10	0.087943		Q13835	83 kDa	3
138	Prolactin-inducible protein OS=Homo sapiens GN=PIP PE=1 SV=1	10	0.087943		P12273	17 kDa	3
139	Pyruvate kinase PKM OS=Homo sapiens GN=PKM PE=1 SV=4	10	0.087943		P14618	58 kDa	5
140	Transforming growth factor-beta-induced protein ig-h3 OS=Homo sapiens GN=TGFBI PE=1 SV=1	10	0.087943		Q15582	75 kDa	10
141	Carboxypeptidase N subunit 2 OS=Homo sapiens GN=CPN2 PE=1 SV=3	9	0.0791487		P22792	61 kDa	6
142	Glyceraldehyde-3-phosphate dehydrogenase OS=Homo sapiens GN=GAPDH PE=1 SV=3	9	0.0791487		P04406	36 kDa	3
143	Ig heavy chain V-III region WEA OS=Homo sapiens PE=1 SV=1	9	0.0791487		P01763	12 kDa	2
144	Isoform 2 of Ficolin-3 OS=Homo sapiens GN=FCN3	9	0.0791487		O75636-2	32 kDa	7
145	Protein IGHV5-51 (Fragment) OS=Homo sapiens GN=IGHV5-51 PE=1 SV=1	9	0.0791487		A0A0C4DH38	13 kDa	4
146	Serum amyloid P-component OS=Homo sapiens GN=APCS PE=1 SV=2	9	0.0791487		P02743	25 kDa	5
147	Alpha-1-antichymotrypsin OS=Homo sapiens GN=SERPINA3 PE=1 SV=2	8	0.0703544		P01011	48 kDa	6
148	Complement factor I OS=Homo sapiens GN=CFI PE=1 SV=1	8	0.0703544		E7ETH0	67 kDa	5
149	Pigment epithelium-derived factor OS=Homo sapiens GN=SERPINF1 PE=1 SV=4	8	0.0703544		P36955	46 kDa	7
150	Angiotensinogen OS=Homo sapiens GN=AGT PE=1 SV=1	7	0.0615601		P01019	53 kDa	6
151	Cystatin-A OS=Homo sapiens GN=CSTA PE=1 SV=1	7	0.0615601		P01040	11 kDa	3
152	Heat shock cognate 71 kDa protein OS=Homo sapiens GN=HSPA8 PE=1 SV=1	7	0.0615601		E9PKE3 (+1)	69 kDa	2
153	Peroxiredoxin-2 OS=Homo sapiens GN=PRDX2 PE=1 SV=5	7	0.0615601		P32119	22 kDa	3
154	Phosphatidylinositol-glycan-specific phospholipase D OS=Homo sapiens GN=GPLD1 PE=1 SV=3	7	0.0615601		P80108	92 kDa	6
155	Protein IGHV3-15 (Fragment) OS=Homo sapiens GN=IGHV3-15 PE=1 SV=1	7	0.0615601		A0A0B4J1V0	13 kDa	2
156	Protein IGHV3-30 (Fragment) OS=Homo sapiens GN=IGHV3-30 PE=1 SV=1	7	0.0615601		A0A0B4J2B7	13 kDa	2
157	Skin-specific protein 32 OS=Homo sapiens GN=XP32 PE=1 SV=1	7	0.0615601		Q5T750	26 kDa	4
158	Actin, aortic smooth muscle OS=Homo sapiens GN=ACTA2 PE=1 SV=1	6	0.0527658		P62736 (+1)	42 kDa	3
159	Alpha-1-acid glycoprotein 2 OS=Homo sapiens GN=ORM2 PE=1 SV=2	6	0.0527658		P19652	24 kDa	4
160	Apolipoprotein C-IV OS=Homo sapiens GN=APOC4 PE=1 SV=1	6	0.0527658		P55056	15 kDa	3
161	Apolipoprotein M OS=Homo sapiens GN=APOM PE=1 SV=2	6	0.0527658		O95445	21 kDa	4
162	Arginase-1 OS=Homo sapiens GN=ARG1 PE=1 SV=2	6	0.0527658		P05089	35 kDa	4
163	Cathelicidin antimicrobial peptide OS=Homo sapiens GN=CAMP PE=1 SV=1	6	0.0527658		J3KNB4	20 kDa	4
164	Galectin-7 OS=Homo sapiens GN=LGALS7 PE=1 SV=2	6	0.0527658		P47929	15 kDa	2
165	Insulin-like growth factor-binding protein 2 OS=Homo sapiens GN=IGFBP2 PE=1 SV=2	6	0.0527658		P18065	35 kDa	3
166	Multiple inositol polyphosphate phosphatase 1 OS=Homo sapiens GN=MINPP1 PE=1 SV=1	6	0.0527658		Q9UNW1	55 kDa	5
167	Secreted phosphoprotein 24 OS=Homo sapiens GN=SPP2 PE=1 SV=1	6	0.0527658		Q13103	24 kDa	5
168	Thioredoxin OS=Homo sapiens GN=TXN PE=1 SV=3	6	0.0527658		P10599 (+1)	12 kDa	2
169	Fibrinogen alpha chain OS=Homo sapiens GN=FGA PE=1 SV=2	5	0.0439715		P02671	95 kDa	4
170	Hemoglobin subunit alpha OS=Homo sapiens GN=HBA1 PE=1 SV=2	5	0.0439715		P69905	15 kDa	3
171	Hemopexin OS=Homo sapiens GN=HPX PE=1 SV=2	5	0.0439715		P02790	52 kDa	3
172	Ig kappa chain V-IV region Len OS=Homo sapiens PE=1 SV=2	5	0.0439715		P01625	13 kDa	3
173	Lysozyme C OS=Homo sapiens GN=LYZ PE=1 SV=1	5	0.0439715		P61626	17 kDa	2
174	Prenylcysteine oxidase 1 OS=Homo sapiens GN=PCYOX1 PE=1 SV=3	5	0.0439715		Q9UHG3	57 kDa	3
175	Protein APOC4-APOC2 OS=Homo sapiens GN=APOC4-APOC2 PE=4 SV=1	5	0.0439715		K7ER74	20 kDa	2
176	Protein IGLV1-47 (Fragment) OS=Homo sapiens GN=IGLV1-47 PE=1 SV=1	5	0.0439715		A0A075B6I8	12 kDa	3
177	Protein IGLV3-25 (Fragment) OS=Homo sapiens GN=IGLV3-25 PE=1 SV=2	5	0.0439715		A0A075B6J4	12 kDa	2
178	Protein S100-A9 OS=Homo sapiens GN=S100A9 PE=1 SV=1	5	0.0439715		P06702	13 kDa	2
179	Protein-glutamine gamma-glutamyltransferase E OS=Homo sapiens GN=TGM3 PE=1 SV=4	5	0.0439715		Q08188	77 kDa	5
180	Suprabasin OS=Homo sapiens GN=SBSN PE=1 SV=2	5	0.0439715		Q6UWP8	61 kDa	2
181	Adipocyte plasma membrane-associated protein OS=Homo sapiens GN=APMAP PE=1 SV=2	4	0.0351772		Q9HDC9	46 kDa	4
182	Apolipoprotein C-III OS=Homo sapiens GN=APOC3 PE=1 SV=1	4	0.0351772		B0YIW2 (+1)	13 kDa	2
183	Cornifin-B OS=Homo sapiens GN=SPRR1B PE=1 SV=2	4	0.0351772		P22528	10 kDa	2
184	Dihydrolipoyl dehydrogenase, mitochondrial OS=Homo sapiens GN=DLD PE=1 SV=2	4	0.0351772		P09622	54 kDa	2
185	Ig heavy chain V-II region NEWM OS=Homo sapiens PE=1 SV=1	4	0.0351772		P01825	13 kDa	2
186	Ig lambda chain V-III region SH OS=Homo sapiens PE=1 SV=1	4	0.0351772		P01714	11 kDa	2
187	Inter-alpha-trypsin inhibitor heavy chain H3 OS=Homo sapiens GN=ITIH3 PE=1 SV=2	4	0.0351772		Q06033 (+1)	100 kDa	4
188	Isoform 3 of Collagen alpha-1(XVIII) chain OS=Homo sapiens GN=COL18A1	4	0.0351772		P39060-2	136 kDa	3
189	Isoform 3 of L-lactate dehydrogenase A chain OS=Homo sapiens GN=LDHA	4	0.0351772		P00338-3	40 kDa	4
190	Isoform B of Coagulation factor VII OS=Homo sapiens GN=F7	4	0.0351772		P08709-2	49 kDa	4
191	Mannosyl-oligosaccharide 1,2-alpha-mannosidase IA OS=Homo sapiens GN=MAN1A1 PE=1 SV=3	4	0.0351772		P33908	73 kDa	4
192	Neutrophil defensin 1 OS=Homo sapiens GN=DEFA1 PE=1 SV=1	4	0.0351772		P59665 (+1)	10 kDa	2
193	Polyubiquitin-C (Fragment) OS=Homo sapiens GN=UBC PE=1 SV=2	4	0.0351772		F5GXK7 (+1)	19 kDa	2
194	Alstrom syndrome protein 1 OS=Homo sapiens GN=ALMS1 PE=1 SV=1	3	0.0263829		A0A087WTU9-DECOY (+2)	?	3
195	Angiopoietin-related protein 3 OS=Homo sapiens GN=ANGPTL3 PE=1 SV=1	3	0.0263829		Q9Y5C1	54 kDa	3
196	Cathepsin S OS=Homo sapiens GN=CTSS PE=1 SV=3	3	0.0263829		P25774	37 kDa	3
197	Extracellular matrix protein 1 OS=Homo sapiens GN=ECM1 PE=1 SV=2	3	0.0263829		Q16610 (+1)	61 kDa	2
198	Ficolin-2 OS=Homo sapiens GN=FCN2 PE=1 SV=2	3	0.0263829		Q15485	34 kDa	3
199	Gamma-glutamylcyclotransferase OS=Homo sapiens GN=GGCT PE=1 SV=1	3	0.0263829		O75223	21 kDa	2
200	Ig heavy chain V-III region NIE OS=Homo sapiens PE=1 SV=1	3	0.0263829		P01770	13 kDa	2
201	IgGFc-binding protein OS=Homo sapiens GN=FCGBP PE=1 SV=1	3	0.0263829		A0A087WXI2 (+1)	445 kDa	3
202	Phospholipid transfer protein OS=Homo sapiens GN=PLTP PE=1 SV=1	3	0.0263829		P55058	55 kDa	2
203	Angiogenin OS=Homo sapiens GN=ANG PE=1 SV=1	2	0.0175886		P03950	17 kDa	2
204	Annexin A1 OS=Homo sapiens GN=ANXA1 PE=1 SV=2	2	0.0175886		P04083	39 kDa	2
205	C-reactive protein OS=Homo sapiens GN=CRP PE=1 SV=1	2	0.0175886		P02741	25 kDa	2
206	Cartilage oligomeric matrix protein OS=Homo sapiens GN=COMP PE=1 SV=1	2	0.0175886		G3XAP6 (+1)	80 kDa	2
207	Creatine kinase M-type OS=Homo sapiens GN=CKM PE=1 SV=2	2	0.0175886		P06732	43 kDa	2
208	Endoplasmin OS=Homo sapiens GN=HSP90B1 PE=1 SV=1	2	0.0175886		P14625	92 kDa	2
209	Exostosin-2 OS=Homo sapiens GN=EXT2 PE=1 SV=1	2	0.0175886		Q93063 (+1)	82 kDa	2
210	Fructose-bisphosphate aldolase OS=Homo sapiens GN=ALDOA PE=1 SV=1	2	0.0175886		J3KPS3 (+1)	40 kDa	2
211	GEM-interacting protein (Fragment) OS=Homo sapiens GN=GMIP PE=1 SV=1	2	0.0175886		K7EJC2	33 kDa	2
212	Glutathione peroxidase OS=Homo sapiens GN=GPX3 PE=1 SV=1	2	0.0175886		A0A087X1J7 (+1)	25 kDa	2
213	Mannan-binding lectin serine protease 2 OS=Homo sapiens GN=MASP2 PE=1 SV=4	2	0.0175886		O00187	76 kDa	2
214	Neuropilin-1 OS=Homo sapiens GN=NRP1 PE=1 SV=3	2	0.0175886		O14786	103 kDa	2
215	Protein IGLV8-61 (Fragment) OS=Homo sapiens GN=IGLV8-61 PE=1 SV=4	2	0.0175886		A0A075B6I0	13 kDa	2
216	Protein-glutamine gamma-glutamyltransferase K OS=Homo sapiens GN=TGM1 PE=1 SV=4	2	0.0175886		P22735	90 kDa	2
217	Ribonuclease 4 OS=Homo sapiens GN=RNASE4 PE=1 SV=3	2	0.0175886		P34096	17 kDa	2
