# Supplementary material for: Methods of protein corona isolation for magnetic nanoparticles
Source: Royal Society of Chemistry journal article supplement (doi:10.1039/c7an00646b), 2017-01-01
Supplement: c7an00646b4.xlsx [file c7an00646b4.xlsx]

## Sheet: B1400 MagSep
Number	Identified Proteins	B1400 MagSep	Relative abundance (%)	Sum	Accession Number	Molecular Weight	B1400 Peptide Count
1	Serum albumin OS=Homo sapiens GN=ALB PE=1 SV=2	803	8.22325		P02768	69 kDa	79
2	Complement C3 OS=Homo sapiens GN=C3 PE=1 SV=2	479	4.90527	9765	P01024	187 kDa	109
3	Fibrinogen gamma chain OS=Homo sapiens GN=FGG PE=1 SV=3	459	4.70046		P02679 (+1)	52 kDa	60
4	Fibrinogen beta chain OS=Homo sapiens GN=FGB PE=1 SV=2	441	4.51613		P02675	56 kDa	61
5	Complement factor H OS=Homo sapiens GN=CFH PE=1 SV=4	410	4.19867		P08603	139 kDa	92
6	Complement C4-A OS=Homo sapiens GN=C4A PE=1 SV=2	341	3.49206		P0C0L4	193 kDa	105
7	Complement C4-B OS=Homo sapiens GN=C4B PE=1 SV=2	339	3.47158		P0C0L5	193 kDa	4
8	Apolipoprotein B-100 OS=Homo sapiens GN=APOB PE=1 SV=2	323	3.30773		P04114	516 kDa	168
9	Apolipoprotein A-I OS=Homo sapiens GN=APOA1 PE=1 SV=1	301	3.08244		P02647	31 kDa	38
10	Ig gamma-1 chain C region OS=Homo sapiens GN=IGHG1 PE=1 SV=1	295	3.02099		P01857	36 kDa	46
11	Complement component C9 OS=Homo sapiens GN=C9 PE=1 SV=2	241	2.468		P02748	63 kDa	43
12	Ceruloplasmin OS=Homo sapiens GN=CP PE=1 SV=1	226	2.31439		P00450	122 kDa	64
13	Fibrinogen alpha chain OS=Homo sapiens GN=FGA PE=1 SV=2	208	2.13006		P02671	95 kDa	42
14	Fibronectin OS=Homo sapiens GN=FN1 PE=1 SV=4	208	2.13006		P02751 (+1)	263 kDa	88
15	C4b-binding protein alpha chain OS=Homo sapiens GN=C4BPA PE=1 SV=2	201	2.05837		P04003	67 kDa	41
16	Ig kappa chain C region OS=Homo sapiens GN=IGKC PE=1 SV=1	185	1.89452		P01834	12 kDa	15
17	Complement C1r subcomponent OS=Homo sapiens GN=C1R PE=1 SV=2	181	1.85356		P00736	80 kDa	42
18	Ig gamma-3 chain C region OS=Homo sapiens GN=IGHG3 PE=1 SV=2	179	1.83308		P01860	41 kDa	14
19	Complement C1s subcomponent OS=Homo sapiens GN=C1S PE=1 SV=1	168	1.72043		P09871	77 kDa	37
20	Beta-2-glycoprotein 1 OS=Homo sapiens GN=APOH PE=1 SV=3	146	1.49514		P02749	38 kDa	38
21	Plasminogen OS=Homo sapiens GN=PLG PE=1 SV=2	121	1.23912		P00747	91 kDa	38
22	Ig gamma-2 chain C region OS=Homo sapiens GN=IGHG2 PE=1 SV=2	119	1.21864		P01859	36 kDa	8
23	Kaliocin-1 (Fragment) OS=Homo sapiens GN=LTF PE=1 SV=1	110	1.12647		E7EQB2 (+2)	77 kDa	47
24	Serotransferrin OS=Homo sapiens GN=TF PE=1 SV=3	107	1.09575		P02787	77 kDa	34
25	Gelsolin OS=Homo sapiens GN=GSN PE=1 SV=1	104	1.06503		P06396	86 kDa	35
26	Alpha-1-antitrypsin OS=Homo sapiens GN=SERPINA1 PE=1 SV=3	96	0.983103		P01009	47 kDa	27
27	Isoform LMW of Kininogen-1 OS=Homo sapiens GN=KNG1	89	0.911418		P01042-2	48 kDa	25
28	Histidine-rich glycoprotein OS=Homo sapiens GN=HRG PE=1 SV=1	88	0.901178		P04196	60 kDa	21
29	Complement factor B OS=Homo sapiens GN=CFB PE=2 SV=1	86	0.880696		B4E1Z4	141 kDa	30
30	Prothrombin OS=Homo sapiens GN=F2 PE=1 SV=2	86	0.880696		P00734	70 kDa	23
31	Plasma kallikrein heavy chain (Fragment) OS=Homo sapiens GN=KLKB1 PE=3 SV=1	83	0.849974		H0YAC1 (+1)	77 kDa	37
32	Alpha-2-macroglobulin OS=Homo sapiens GN=A2M PE=1 SV=3	81	0.829493		P01023	163 kDa	39
33	Complement factor H-related protein 1 OS=Homo sapiens GN=CFHR1 PE=1 SV=2	79	0.809012		Q03591	38 kDa	13
34	Alpha-2-HS-glycoprotein OS=Homo sapiens GN=AHSG PE=1 SV=1	77	0.78853		P02765	39 kDa	16
35	Haptoglobin OS=Homo sapiens GN=HP PE=1 SV=1	75	0.768049		P00738	45 kDa	21
36	Antithrombin-III OS=Homo sapiens GN=SERPINC1 PE=1 SV=1	73	0.747568		P01008	53 kDa	18
37	Apolipoprotein A-II OS=Homo sapiens GN=APOA2 PE=1 SV=1	69	0.706605		P02652 (+1)	11 kDa	21
38	Complement C1q subcomponent subunit B OS=Homo sapiens GN=C1QB PE=2 SV=1	64	0.655402		D6R934 (+1)	26 kDa	13
39	Truncated apolipoprotein C-I (Fragment) OS=Homo sapiens GN=APOC1 PE=2 SV=1	56	0.573477		K7ERI9 (+1)	9 kDa	17
40	Plasma protease C1 inhibitor OS=Homo sapiens GN=SERPING1 PE=2 SV=1	55	0.563236		B4E1F0 (+2)	56 kDa	19
41	Coagulation factor XII OS=Homo sapiens GN=F12 PE=1 SV=3	53	0.542755		P00748	68 kDa	24
42	Vitronectin OS=Homo sapiens GN=VTN PE=1 SV=1	53	0.542755		P04004	54 kDa	19
43	Alpha-1-antichymotrypsin OS=Homo sapiens GN=SERPINA3 PE=1 SV=2	50	0.512033		P01011	48 kDa	18
44	Ig mu chain C region OS=Homo sapiens GN=IGHM PE=1 SV=3	49	0.501792		P01871 (+1)	49 kDa	15
45	Apolipoprotein E OS=Homo sapiens GN=APOE PE=1 SV=1	48	0.491551		P02649	36 kDa	17
46	Ig alpha-1 chain C region OS=Homo sapiens GN=IGHA1 PE=1 SV=2	48	0.491551		P01876	38 kDa	16
47	Complement C1q subcomponent subunit C OS=Homo sapiens GN=C1QC PE=1 SV=3	46	0.47107		P02747	26 kDa	7
48	Pigment epithelium-derived factor OS=Homo sapiens GN=SERPINF1 PE=1 SV=4	46	0.47107		P36955	46 kDa	22
49	C-reactive protein OS=Homo sapiens GN=CRP PE=1 SV=1	44	0.450589		P02741	25 kDa	12
50	Complement component C8 beta chain OS=Homo sapiens GN=C8B PE=1 SV=3	44	0.450589		P07358	67 kDa	21
51	Isoform F of Proteoglycan 4 OS=Homo sapiens GN=PRG4	40	0.409626		Q92954-6	146 kDa	24
52	Complement C5 OS=Homo sapiens GN=C5 PE=1 SV=4	38	0.389145		P01031	188 kDa	25
53	Lipopolysaccharide-binding protein OS=Homo sapiens GN=LBP PE=1 SV=3	38	0.389145		P18428	53 kDa	17
54	Ig lambda-2 chain C regions OS=Homo sapiens GN=IGLC2 PE=1 SV=1	36	0.368664		P0CG05	11 kDa	3
55	Ig mu heavy chain disease protein OS=Homo sapiens PE=1 SV=1	36	0.368664		P04220	43 kDa	2
56	Serum amyloid P-component OS=Homo sapiens GN=APCS PE=1 SV=2	36	0.368664		P02743	25 kDa	13
57	Sulfhydryl oxidase 1 OS=Homo sapiens GN=QSOX1 PE=1 SV=3	36	0.368664		O00391	83 kDa	26
58	Immunoglobulin lambda-like polypeptide 5 OS=Homo sapiens GN=IGLL5 PE=2 SV=2	34	0.348182		B9A064	23 kDa	14
59	Haptoglobin-related protein OS=Homo sapiens GN=HPR PE=1 SV=2	33	0.337942		P00739	39 kDa	2
60	Complement component C8 alpha chain OS=Homo sapiens GN=C8A PE=1 SV=2	31	0.31746		P07357	65 kDa	20
61	Procollagen C-endopeptidase enhancer 1 OS=Homo sapiens GN=PCOLCE PE=1 SV=2	31	0.31746		Q15113	48 kDa	16
62	Collagen alpha-1(I) chain OS=Homo sapiens GN=COL1A1 PE=1 SV=5	30	0.30722		P02452	139 kDa	15
63	Tenascin OS=Homo sapiens GN=TNC PE=1 SV=3	29	0.296979		P24821	241 kDa	25
64	Complement component C7 OS=Homo sapiens GN=C7 PE=1 SV=2	28	0.286738		P10643	94 kDa	18
65	Ig kappa chain V-III region HAH OS=Homo sapiens PE=2 SV=1	28	0.286738		P18135	14 kDa	11
66	Collagen alpha-1(XII) chain OS=Homo sapiens GN=COL12A1 PE=1 SV=1	27	0.276498		D6RGG3 (+2)	333 kDa	17
67	Complement factor H-related protein 3 OS=Homo sapiens GN=CFHR3 PE=1 SV=2	27	0.276498		Q02985 (+1)	37 kDa	5
68	Inter-alpha-trypsin inhibitor heavy chain H1 OS=Homo sapiens GN=ITIH1 PE=1 SV=3	27	0.276498		P19827	101 kDa	14
69	Inter-alpha-trypsin inhibitor heavy chain H2 OS=Homo sapiens GN=ITIH2 PE=1 SV=2	27	0.276498		P19823 (+1)	106 kDa	14
70	Complement component C6 OS=Homo sapiens GN=C6 PE=1 SV=3	26	0.266257		P13671	105 kDa	23
71	Complement factor H-related protein 2 OS=Homo sapiens GN=CFHR2 PE=1 SV=1	26	0.266257		P36980 (+1)	31 kDa	2
72	Actin, cytoplasmic 1 OS=Homo sapiens GN=ACTB PE=1 SV=1	23	0.235535		P60709	42 kDa	14
73	Carboxypeptidase B2 OS=Homo sapiens GN=CPB2 PE=1 SV=2	23	0.235535		Q96IY4	48 kDa	12
74	Complement C1q subcomponent subunit A OS=Homo sapiens GN=C1QA PE=1 SV=2	22	0.225294		P02745	26 kDa	6
75	Hemopexin OS=Homo sapiens GN=HPX PE=1 SV=2	22	0.225294		P02790	52 kDa	10
76	Annexin A1 OS=Homo sapiens GN=ANXA1 PE=1 SV=2	20	0.204813		P04083	39 kDa	13
77	Collagen alpha-2(I) chain OS=Homo sapiens GN=COL1A2 PE=1 SV=7	20	0.204813		P08123	129 kDa	16
78	Complement factor H-related protein 5 OS=Homo sapiens GN=CFHR5 PE=2 SV=1	20	0.204813		Q5VYL6 (+1)	67 kDa	10
79	Hornerin OS=Homo sapiens GN=HRNR PE=1 SV=2	19	0.194572		Q86YZ3	282 kDa	8
80	Alpha-2-antiplasmin OS=Homo sapiens GN=SERPINF2 PE=1 SV=3	18	0.184332		P08697	55 kDa	9
81	Alpha-1-acid glycoprotein 1 OS=Homo sapiens GN=ORM1 PE=1 SV=1	17	0.174091		P02763	24 kDa	7
82	Complement factor D OS=Homo sapiens GN=CFD PE=2 SV=1	17	0.174091		K7ERG9 (+1)	28 kDa	11
83	Transforming growth factor-beta-induced protein ig-h3 OS=Homo sapiens GN=TGFBI PE=2 SV=1	17	0.174091		G8JLA8 (+1)	75 kDa	15
84	Inter-alpha-trypsin inhibitor heavy chain H4 OS=Homo sapiens GN=ITIH4 PE=1 SV=4	15	0.15361		Q14624	103 kDa	11
85	Moesin OS=Homo sapiens GN=MSN PE=1 SV=3	15	0.15361		P26038	68 kDa	13
86	Insulin-like growth factor-binding protein complex acid labile subunit OS=Homo sapiens GN=IGFALS PE=1 SV=1	14	0.143369		P35858 (+1)	66 kDa	13
87	Protein S (Alpha), isoform CRA_b OS=Homo sapiens GN=PROS1 PE=4 SV=1	14	0.143369		G5E9F8 (+1)	60 kDa	9
88	Tetranectin OS=Homo sapiens GN=CLEC3B PE=4 SV=1	14	0.143369		E9PHK0 (+1)	18 kDa	10
89	Vitamin D-binding protein OS=Homo sapiens GN=GC PE=1 SV=1	14	0.143369		D6RF35 (+2)	53 kDa	12
90	Apolipoprotein A-IV OS=Homo sapiens GN=APOA4 PE=1 SV=3	13	0.133129		P06727	45 kDa	10
91	Apolipoprotein(a) OS=Homo sapiens GN=LPA PE=1 SV=1	13	0.133129		P08519	501 kDa	9
92	Clusterin OS=Homo sapiens GN=CLU PE=1 SV=1	13	0.133129		P10909 (+3)	52 kDa	8
93	Phospholipid transfer protein OS=Homo sapiens GN=PLTP PE=1 SV=1	12	0.122888		B3KUE5 (+1)	57 kDa	9
94	Properdin OS=Homo sapiens GN=CFP PE=1 SV=2	12	0.122888		P27918	51 kDa	9
95	Thrombospondin-1 OS=Homo sapiens GN=THBS1 PE=1 SV=2	12	0.122888		P07996	129 kDa	10
96	Alpha-enolase OS=Homo sapiens GN=ENO1 PE=1 SV=2	11	0.112647		P06733	47 kDa	9
97	Coagulation factor XI OS=Homo sapiens GN=F11 PE=1 SV=1	11	0.112647		P03951	70 kDa	10
98	Glyceraldehyde-3-phosphate dehydrogenase OS=Homo sapiens GN=GAPDH PE=1 SV=3	10	0.102407		P04406 (+1)	36 kDa	7
99	Chitinase-3-like protein 1 OS=Homo sapiens GN=CHI3L1 PE=1 SV=2	9	0.0921659		P36222	43 kDa	9
100	Ig heavy chain V-III region BRO OS=Homo sapiens PE=1 SV=1	9	0.0921659		P01766	13 kDa	3
101	Protein AMBP OS=Homo sapiens GN=AMBP PE=1 SV=1	9	0.0921659		P02760	39 kDa	6
102	Hyaluronan-binding protein 2 OS=Homo sapiens GN=HABP2 PE=1 SV=1	8	0.0819252		Q14520 (+1)	63 kDa	6
103	Myeloperoxidase OS=Homo sapiens GN=MPO PE=1 SV=1	8	0.0819252		P05164 (+2)	84 kDa	7
104	Protein Z-dependent protease inhibitor OS=Homo sapiens GN=SERPINA10 PE=3 SV=1	8	0.0819252		G3V2W1 (+1)	55 kDa	6
105	Cartilage intermediate layer protein 1 OS=Homo sapiens GN=CILP PE=1 SV=4	7	0.0716846		O75339	133 kDa	7
106	Fructose-bisphosphate aldolase A OS=Homo sapiens GN=ALDOA PE=1 SV=2	7	0.0716846		P04075 (+1)	39 kDa	7
107	Metalloproteinase inhibitor 1 OS=Homo sapiens GN=TIMP1 PE=1 SV=1	7	0.0716846		P01033 (+1)	23 kDa	6
108	Plasma serine protease inhibitor OS=Homo sapiens GN=SERPINA5 PE=1 SV=3	7	0.0716846		P05154	46 kDa	6
109	Protein APOC4-APOC2 OS=Homo sapiens GN=APOC4-APOC2 PE=4 SV=1	7	0.0716846		K7ER74	20 kDa	5
110	Serum paraoxonase/arylesterase 1 OS=Homo sapiens GN=PON1 PE=1 SV=3	7	0.0716846		P27169	40 kDa	5
111	Angiotensinogen OS=Homo sapiens GN=AGT PE=1 SV=1	6	0.0614439		P01019	53 kDa	4
112	Annexin A2 OS=Homo sapiens GN=ANXA2 PE=1 SV=2	6	0.0614439		P07355 (+1)	39 kDa	5
113	Hemoglobin subunit beta OS=Homo sapiens GN=HBB PE=1 SV=2	6	0.0614439		P68871	16 kDa	3
114	Ig kappa chain V-II region TEW OS=Homo sapiens PE=1 SV=1	6	0.0614439		P01617	12 kDa	4
115	Ig kappa chain V-III region B6 OS=Homo sapiens PE=1 SV=1	6	0.0614439		P01619	12 kDa	2
116	Ig kappa chain V-III region VG (Fragment) OS=Homo sapiens PE=1 SV=1	6	0.0614439		P04433	13 kDa	2
117	Isoform 2 of C4b-binding protein beta chain OS=Homo sapiens GN=C4BPB	6	0.0614439		P20851-2	28 kDa	5
118	Nicotinamide phosphoribosyltransferase OS=Homo sapiens GN=NAMPT PE=1 SV=1	6	0.0614439		P43490	56 kDa	6
119	Phosphoglycerate kinase OS=Homo sapiens GN=PGK1 PE=1 SV=1	6	0.0614439		B7Z7A9 (+1)	41 kDa	6
120	Serum amyloid A-4 protein OS=Homo sapiens GN=SAA4 PE=1 SV=2	6	0.0614439		P35542	15 kDa	5
121	Tenascin-X OS=Homo sapiens GN=TNXB PE=2 SV=1	6	0.0614439		E7EPZ9 (+2)	458 kDa	6
122	Actin-related protein 2 OS=Homo sapiens GN=ACTR2 PE=1 SV=1	5	0.0512033		F5H6T1 (+2)	35 kDa	5
123	Apolipoprotein D (Fragment) OS=Homo sapiens GN=APOD PE=2 SV=1	5	0.0512033		C9JF17 (+1)	24 kDa	3
124	Apolipoprotein L1 OS=Homo sapiens GN=APOL1 PE=2 SV=1	5	0.0512033		G8JL88 (+3)	31 kDa	5
125	Collagen alpha-1(V) chain OS=Homo sapiens GN=COL5A1 PE=1 SV=3	5	0.0512033		P20908	184 kDa	4
126	Complement factor I light chain OS=Homo sapiens GN=CFI PE=2 SV=1	5	0.0512033		E7ETH0 (+2)	67 kDa	4
127	Ig heavy chain V-III region VH26 OS=Homo sapiens PE=1 SV=1	5	0.0512033		P01764	13 kDa	3
128	Leukocyte elastase inhibitor OS=Homo sapiens GN=SERPINB1 PE=1 SV=1	5	0.0512033		P30740	43 kDa	5
129	Plastin-2 OS=Homo sapiens GN=LCP1 PE=1 SV=6	5	0.0512033		P13796	70 kDa	5
130	Transketolase OS=Homo sapiens GN=TKT PE=1 SV=1	5	0.0512033		B4E022 (+2)	63 kDa	4
131	6-phosphogluconate dehydrogenase, decarboxylating OS=Homo sapiens GN=PGD PE=1 SV=1	4	0.0409626		B4DQJ8 (+2)	52 kDa	3
132	78 kDa glucose-regulated protein OS=Homo sapiens GN=HSPA5 PE=1 SV=2	4	0.0409626		P11021	72 kDa	2
133	Apolipoprotein C-IV OS=Homo sapiens GN=APOC4 PE=1 SV=1	4	0.0409626		P55056	15 kDa	2
134	CD5 antigen-like OS=Homo sapiens GN=CD5L PE=1 SV=1	4	0.0409626		O43866	38 kDa	4
135	Collagen alpha-1(III) chain OS=Homo sapiens GN=COL3A1 PE=2 SV=1	4	0.0409626		E7ENY8 (+2)	112 kDa	3
136	Collagen alpha-3(VI) chain OS=Homo sapiens GN=COL6A3 PE=1 SV=1	4	0.0409626		E9PCV6 (+1)	322 kDa	4
137	Dermcidin OS=Homo sapiens GN=DCD PE=1 SV=2	4	0.0409626		P81605 (+1)	11 kDa	2
138	EGF-containing fibulin-like extracellular matrix protein 1 OS=Homo sapiens GN=EFEMP1 PE=1 SV=2	4	0.0409626		Q12805 (+3)	55 kDa	3
139	Heat shock cognate 71 kDa protein OS=Homo sapiens GN=HSPA8 PE=1 SV=1	4	0.0409626		E9PKE3 (+2)	69 kDa	4
140	Ig kappa chain V-IV region Len OS=Homo sapiens PE=1 SV=2	4	0.0409626		P01625	13 kDa	3
141	Ig lambda chain V-I region WAH OS=Homo sapiens PE=1 SV=1	4	0.0409626		P04208	12 kDa	3
142	Neutrophil gelatinase-associated lipocalin OS=Homo sapiens GN=LCN2 PE=1 SV=1	4	0.0409626		H9KV70 (+2)	23 kDa	3
143	Protein disulfide-isomerase OS=Homo sapiens GN=PDIA3 PE=1 SV=1	4	0.0409626		G5EA52 (+1)	55 kDa	2
144	Pyruvate kinase OS=Homo sapiens GN=PKM PE=1 SV=1	4	0.0409626		H3BQ34 (+3)	31 kDa	3
145	Spondin-1 OS=Homo sapiens GN=SPON1 PE=1 SV=2	4	0.0409626		Q9HCB6	91 kDa	4
146	72 kDa type IV collagenase OS=Homo sapiens GN=MMP2 PE=1 SV=2	3	0.030722		P08253 (+2)	74 kDa	3
147	Alpha-1B-glycoprotein (Fragment) OS=Homo sapiens GN=A1BG PE=4 SV=2	3	0.030722		M0R009 (+1)	33 kDa	3
148	Azurocidin OS=Homo sapiens GN=AZU1 PE=1 SV=3	3	0.030722		P20160	27 kDa	3
149	Cathepsin B OS=Homo sapiens GN=CTSB PE=1 SV=3	3	0.030722		P07858	38 kDa	2
150	Cathepsin G OS=Homo sapiens GN=CTSG PE=1 SV=2	3	0.030722		P08311	29 kDa	3
151	Fibulin-1 OS=Homo sapiens GN=FBLN1 PE=2 SV=1	3	0.030722		B1AHL2 (+6)	78 kDa	3
152	Hepatocyte growth factor activator OS=Homo sapiens GN=HGFAC PE=2 SV=1	3	0.030722		D6RAR4 (+1)	71 kDa	3
153	Ig kappa chain V-I region AG OS=Homo sapiens PE=1 SV=1	3	0.030722		P01593	12 kDa	2
154	Ig lambda chain V-III region LOI OS=Homo sapiens PE=1 SV=1	3	0.030722		P80748	12 kDa	3
155	Isoform 3 of Insulin-like growth factor II OS=Homo sapiens GN=IGF2	3	0.030722		P01344-3	26 kDa	3
156	Keratinocyte proline-rich protein OS=Homo sapiens GN=KPRP PE=1 SV=1	3	0.030722		Q5T749	64 kDa	3
157	Laminin subunit alpha-4 OS=Homo sapiens GN=LAMA4 PE=1 SV=4	3	0.030722		Q16363 (+1)	203 kDa	3
158	Plasminogen activator inhibitor 1 OS=Homo sapiens GN=SERPINE1 PE=1 SV=1	3	0.030722		P05121	45 kDa	3
159	Carboxypeptidase N catalytic chain OS=Homo sapiens GN=CPN1 PE=1 SV=1	2	0.0204813		P15169	52 kDa	2
160	Coagulation factor IX OS=Homo sapiens GN=F9 PE=1 SV=2	2	0.0204813		P00740 (+1)	52 kDa	2
161	Complement component C8 gamma chain OS=Homo sapiens GN=C8G PE=1 SV=3	2	0.0204813		P07360	22 kDa	2
162	EF-hand calcium-binding domain-containing protein 3 OS=Homo sapiens GN=EFCAB3 PE=2 SV=1	2	0.0204813		Q8N7B9 (+1)	50 kDa	2
163	Elongation factor 1-alpha 1 OS=Homo sapiens GN=EEF1A1 PE=1 SV=1	2	0.0204813		P68104 (+1)	50 kDa	2
164	F-actin-capping protein subunit beta OS=Homo sapiens GN=CAPZB PE=1 SV=1	2	0.0204813		B1AK85 (+6)	29 kDa	2
165	Heparin cofactor 2 OS=Homo sapiens GN=SERPIND1 PE=1 SV=3	2	0.0204813		P05546	57 kDa	2
166	Ig heavy chain V-I region HG3 OS=Homo sapiens PE=4 SV=1	2	0.0204813		P01743	13 kDa	2
167	Ig heavy chain V-II region NEWM OS=Homo sapiens PE=1 SV=1	2	0.0204813		P01825	13 kDa	2
168	Ig heavy chain V-III region NIE OS=Homo sapiens PE=1 SV=1	2	0.0204813		P01770	13 kDa	2
169	Ig kappa chain V-III region CLL OS=Homo sapiens PE=1 SV=2	2	0.0204813		P04207	14 kDa	2
170	Immunoglobulin J chain (Fragment) OS=Homo sapiens GN=IGJ PE=1 SV=1	2	0.0204813		D6RHJ6	18 kDa	2
171	Neutrophil defensin 1 OS=Homo sapiens GN=DEFA1 PE=1 SV=1	2	0.0204813		P59665 (+1)	10 kDa	2
172	Peroxiredoxin 2, isoform CRA_a OS=Homo sapiens GN=PRDX2 PE=1 SV=2	2	0.0204813		A6NIW5 (+1)	15 kDa	2
173	Ribonuclease pancreatic OS=Homo sapiens GN=RNASE1 PE=2 SV=1	2	0.0204813		G3V357 (+1)	13 kDa	2
174	Soluble scavenger receptor cysteine-rich domain-containing protein SSC5D OS=Homo sapiens GN=SSC5D PE=2 SV=3	2	0.0204813		A1L4H1	166 kDa	2
175	Zinc-alpha-2-glycoprotein OS=Homo sapiens GN=AZGP1 PE=1 SV=2	2	0.0204813		P25311	34 kDa	2
		9765	100

## Sheet: B1400 MSCM
Number	Identified Proteins (853->211)	B1400 MSCM	Relative abundance (%)	Sum	Accession Number	Molecular Weight	Gel_05 Peptide Count
1	Apolipoprotein B-100 OS=Homo sapiens GN=APOB PE=1 SV=2	1094	11.3005		P04114	516 kDa	195
2	Complement C3 OS=Homo sapiens GN=C3 PE=1 SV=2	906	9.35854	9681	P01024	187 kDa	93
3	Serum albumin OS=Homo sapiens GN=ALB PE=1 SV=2	608	6.28034		P02768	69 kDa	60
4	Complement C4-A OS=Homo sapiens GN=C4A PE=1 SV=2	441	4.55531		P0C0L4	193 kDa	70
5	Complement C4-B OS=Homo sapiens GN=C4B PE=1 SV=2	433	4.47268		P0C0L5	193 kDa	2
6	Apolipoprotein A-I OS=Homo sapiens GN=APOA1 PE=1 SV=1	413	4.26609		P02647	31 kDa	33
7	Apolipoprotein E OS=Homo sapiens GN=APOE PE=1 SV=1	349	3.605		P02649	36 kDa	27
8	Antithrombin-III OS=Homo sapiens GN=SERPINC1 PE=1 SV=1	234	2.41711		P01008	53 kDa	34
9	Alpha-2-macroglobulin OS=Homo sapiens GN=A2M PE=1 SV=3	220	2.27249		P01023	163 kDa	36
10	Histidine-rich glycoprotein OS=Homo sapiens GN=HRG PE=1 SV=1	186	1.92129		P04196	60 kDa	33
11	Plasminogen OS=Homo sapiens GN=PLG PE=1 SV=2	167	1.72503		P00747	91 kDa	32
12	Isoform 3 of Plasma protease C1 inhibitor OS=Homo sapiens GN=SERPING1	160	1.65272		P05155-3	56 kDa	27
13	Complement factor H OS=Homo sapiens GN=CFH PE=1 SV=4	129	1.33251		P08603	139 kDa	31
14	Complement C1q subcomponent subunit C OS=Homo sapiens GN=C1QC PE=1 SV=3	124	1.28086		P02747	26 kDa	7
15	Kininogen-1 OS=Homo sapiens GN=KNG1 PE=1 SV=2	113	1.16723		P01042	72 kDa	29
16	Plasma kallikrein (Fragment) OS=Homo sapiens GN=KLKB1 PE=1 SV=1	112	1.15691		H0YAC1	77 kDa	20
17	Alpha-1-antitrypsin OS=Homo sapiens GN=SERPINA1 PE=1 SV=3	111	1.14658		P01009	47 kDa	19
18	Coagulation factor V OS=Homo sapiens GN=F5 PE=1 SV=1	111	1.14658		A0A0A0MRJ7 (+1)	252 kDa	30
19	Inter-alpha-trypsin inhibitor heavy chain H2 OS=Homo sapiens GN=ITIH2 PE=1 SV=1	110	1.13625		Q5T985	105 kDa	21
20	Gelsolin OS=Homo sapiens GN=GSN PE=1 SV=1	108	1.11559		P06396	86 kDa	26
21	Isoform LMW of Kininogen-1 OS=Homo sapiens GN=KNG1	108	1.11559		P01042-2	48 kDa	2
22	Uncharacterized protein OS=Homo sapiens PE=1 SV=1	106	1.09493		B4E1Z4	141 kDa	19
23	Ig mu chain C region OS=Homo sapiens GN=IGHM PE=1 SV=1	96	0.991633		A0A087X2C0	64 kDa	18
24	Apolipoprotein L1 OS=Homo sapiens GN=APOL1 PE=1 SV=5	92	0.950315		O14791	44 kDa	17
25	C4b-binding protein alpha chain OS=Homo sapiens GN=C4BPA PE=1 SV=2	91	0.939986		P04003	67 kDa	23
26	Complement C1s subcomponent OS=Homo sapiens GN=C1S PE=1 SV=1	90	0.929656		P09871	77 kDa	17
27	Isoform 4 of Clusterin OS=Homo sapiens GN=CLU	90	0.929656		P10909-4	49 kDa	16
28	Ig kappa chain C region OS=Homo sapiens GN=IGKC PE=1 SV=1	85	0.878008		A0A087WYL9	26 kDa	3
29	Protein IGKV3-11 OS=Homo sapiens GN=IGKV3-11 PE=4 SV=1	82	0.84702		A0A087WZW8	26 kDa	9
30	Apolipoprotein A-IV OS=Homo sapiens GN=APOA4 PE=1 SV=3	81	0.83669		P06727	45 kDa	21
31	Vitronectin OS=Homo sapiens GN=VTN PE=1 SV=1	80	0.826361		P04004	54 kDa	24
32	Complement C1q subcomponent subunit B OS=Homo sapiens GN=C1QB PE=1 SV=1	73	0.754054		D6R934 (+1)	26 kDa	9
33	Prothrombin OS=Homo sapiens GN=F2 PE=1 SV=2	70	0.723066		P00734	70 kDa	22
34	Ig gamma-3 chain C region OS=Homo sapiens GN=IGHG3 PE=1 SV=1	67	0.692077		A0A087WXL8	57 kDa	4
35	Hornerin OS=Homo sapiens GN=HRNR PE=1 SV=2	65	0.671418		Q86YZ3	282 kDa	18
36	Coagulation factor XII OS=Homo sapiens GN=F12 PE=1 SV=3	63	0.650759		P00748	68 kDa	14
37	Ig gamma-1 chain C region OS=Homo sapiens GN=IGHG1 PE=1 SV=1	60	0.619771		A0A087WYE1	52 kDa	17
38	Vitamin K-dependent protein S OS=Homo sapiens GN=PROS1 PE=1 SV=1	58	0.599112		P07225	75 kDa	15
39	Serotransferrin OS=Homo sapiens GN=TF PE=1 SV=3	57	0.588782		P02787	77 kDa	15
40	Ig gamma-1 chain C region OS=Homo sapiens GN=IGHG1 PE=1 SV=1	56	0.578453		A0A087WYC5	52 kDa	2
41	Inter-alpha-trypsin inhibitor heavy chain H1 OS=Homo sapiens GN=ITIH1 PE=1 SV=3	53	0.547464		P19827	101 kDa	9
42	Carboxypeptidase B2 OS=Homo sapiens GN=CPB2 PE=1 SV=2	52	0.537135		Q96IY4	48 kDa	12
43	Complement C5 OS=Homo sapiens GN=C5 PE=1 SV=4	52	0.537135		P01031	188 kDa	23
44	Inter-alpha-trypsin inhibitor heavy chain H4 OS=Homo sapiens GN=ITIH4 PE=1 SV=4	48	0.495817		Q14624	103 kDa	13
45	Coagulation factor X OS=Homo sapiens GN=F10 PE=1 SV=2	46	0.475158		P00742	55 kDa	11
46	Protein SAA2-SAA4 OS=Homo sapiens GN=SAA2-SAA4 PE=4 SV=1	42	0.433839		A0A096LPE2	23 kDa	3
47	Complement C1r subcomponent OS=Homo sapiens GN=C1R PE=1 SV=1	40	0.41318		B4DPQ0	82 kDa	17
48	Apolipoprotein C-I (Fragment) OS=Homo sapiens GN=APOC1 PE=1 SV=1	39	0.402851		K7ERI9	9 kDa	8
49	Selenoprotein P OS=Homo sapiens GN=SEPP1 PE=1 SV=3	39	0.402851		P49908	43 kDa	6
50	Alpha-2-antiplasmin OS=Homo sapiens GN=SERPINF2 PE=1 SV=3	38	0.392521		P08697	55 kDa	11
51	Fibronectin OS=Homo sapiens GN=FN1 PE=1 SV=4	34	0.351203		P02751	263 kDa	18
52	Complement component C8 alpha chain OS=Homo sapiens GN=C8A PE=1 SV=2	33	0.340874		P07357	65 kDa	12
53	Sulfhydryl oxidase 1 OS=Homo sapiens GN=QSOX1 PE=1 SV=3	32	0.330544		O00391	83 kDa	15
54	Coagulation factor XI OS=Homo sapiens GN=F11 PE=1 SV=1	31	0.320215		P03951	70 kDa	13
55	Insulin-like growth factor-binding protein complex acid labile subunit OS=Homo sapiens GN=IGFALS PE=1 SV=1	31	0.320215		P35858	66 kDa	11
56	Complement component C9 OS=Homo sapiens GN=C9 PE=1 SV=2	28	0.289226		P02748	63 kDa	9
57	Heparin cofactor 2 OS=Homo sapiens GN=SERPIND1 PE=1 SV=3	28	0.289226		P05546	57 kDa	10
58	Immunoglobulin lambda-like polypeptide 5 OS=Homo sapiens GN=IGLL5 PE=1 SV=1	27	0.278897		A0A087WWT5	25 kDa	8
59	Apolipoprotein(a) OS=Homo sapiens GN=LPA PE=1 SV=1	26	0.268567		P08519	501 kDa	14
60	Hyaluronan-binding protein 2 OS=Homo sapiens GN=HABP2 PE=1 SV=1	26	0.268567		Q14520	63 kDa	8
61	Apolipoprotein A-II OS=Homo sapiens GN=APOA2 PE=1 SV=1	25	0.258238		P02652	11 kDa	5
62	Complement component C6 OS=Homo sapiens GN=C6 PE=1 SV=3	25	0.258238		P13671	105 kDa	11
63	Carboxypeptidase N catalytic chain OS=Homo sapiens GN=CPN1 PE=1 SV=1	24	0.247908		P15169	52 kDa	8
64	Ceruloplasmin OS=Homo sapiens GN=CP PE=1 SV=1	24	0.247908		P00450	122 kDa	9
65	Ig alpha-1 chain C region OS=Homo sapiens GN=IGHA1 PE=1 SV=2	24	0.247908		P01876	38 kDa	6
66	78 kDa glucose-regulated protein OS=Homo sapiens GN=HSPA5 PE=1 SV=2	23	0.237579		P11021	72 kDa	10
67	Haptoglobin OS=Homo sapiens GN=HP PE=1 SV=4	22	0.227249		H0Y300	49 kDa	11
68	Ig lambda-2 chain C regions (Fragment) OS=Homo sapiens GN=IGLC2 PE=4 SV=1	22	0.227249		A0A075B6K9	11 kDa	3
69	Complement component C7 OS=Homo sapiens GN=C7 PE=1 SV=2	21	0.21692		P10643	94 kDa	10
70	Complement component C8 beta chain OS=Homo sapiens GN=C8B PE=1 SV=3	21	0.21692		P07358	67 kDa	10
71	Complement factor H-related protein 1 OS=Homo sapiens GN=CFHR1 PE=1 SV=2	21	0.21692		Q03591	38 kDa	5
72	Protein Z-dependent protease inhibitor OS=Homo sapiens GN=SERPINA10 PE=1 SV=1	21	0.21692		G3V2W1	55 kDa	5
73	Coagulation factor IX OS=Homo sapiens GN=F9 PE=1 SV=2	20	0.20659		P00740	52 kDa	8
74	Lipopolysaccharide-binding protein OS=Homo sapiens GN=LBP PE=1 SV=3	20	0.20659		P18428	53 kDa	6
75	Plasma serine protease inhibitor OS=Homo sapiens GN=SERPINA5 PE=1 SV=3	19	0.196261		P05154	46 kDa	4
76	Thrombospondin-1 OS=Homo sapiens GN=THBS1 PE=1 SV=2	19	0.196261		P07996	129 kDa	12
77	Complement factor H-related protein 5 OS=Homo sapiens GN=CFHR5 PE=1 SV=1	18	0.185931		Q9BXR6	64 kDa	5
78	Hepatocyte growth factor activator OS=Homo sapiens GN=HGFAC PE=1 SV=1	18	0.185931		D6RAR4 (+1)	71 kDa	3
79	Properdin OS=Homo sapiens GN=CFP PE=1 SV=2	18	0.185931		P27918	51 kDa	7
80	Insulin-like growth factor-binding protein 3 OS=Homo sapiens GN=IGFBP3 PE=1 SV=2	17	0.175602		P17936 (+1)	32 kDa	11
81	Apolipoprotein D (Fragment) OS=Homo sapiens GN=APOD PE=1 SV=1	16	0.165272		C9JF17 (+1)	24 kDa	5
82	Complement C1q subcomponent subunit A OS=Homo sapiens GN=C1QA PE=1 SV=2	16	0.165272		P02745	26 kDa	4
83	Ig kappa chain V-III region HAH OS=Homo sapiens PE=2 SV=1	16	0.165272		P18135	14 kDa	5
84	Isoform 2 of Dermcidin OS=Homo sapiens GN=DCD	16	0.165272		P81605-2	12 kDa	5
85	Haptoglobin-related protein OS=Homo sapiens GN=HPR PE=2 SV=2	15	0.154943		P00739	39 kDa	2
86	Alpha-1-antichymotrypsin OS=Homo sapiens GN=SERPINA3 PE=1 SV=2	14	0.144613		P01011	48 kDa	4
87	Complement factor D OS=Homo sapiens GN=CFD PE=1 SV=5	13	0.134284		P00746	27 kDa	5
88	Fibrinogen gamma chain OS=Homo sapiens GN=FGG PE=1 SV=3	13	0.134284		P02679 (+1)	52 kDa	5
89	Serum paraoxonase/arylesterase 1 OS=Homo sapiens GN=PON1 PE=1 SV=3	13	0.134284		P27169	40 kDa	5
90	Transthyretin OS=Homo sapiens GN=TTR PE=1 SV=1	13	0.134284		P02766	16 kDa	4
91	Beta-2-glycoprotein 1 OS=Homo sapiens GN=APOH PE=1 SV=3	12	0.123954		P02749	38 kDa	5
92	Ig delta chain C region (Fragment) OS=Homo sapiens GN=IGHD PE=1 SV=1	12	0.123954		A0A0A0MS09	48 kDa	2
93	Isoform 2 of Vitamin K-dependent protein C OS=Homo sapiens GN=PROC	12	0.123954		P04070-2	58 kDa	5
94	Mannan-binding lectin serine protease 1 OS=Homo sapiens GN=MASP1 PE=1 SV=3	12	0.123954		P48740	79 kDa	2
95	Pyruvate kinase PKM OS=Homo sapiens GN=PKM PE=1 SV=4	12	0.123954		P14618	58 kDa	7
96	Apolipoprotein A-V OS=Homo sapiens GN=APOA5 PE=1 SV=1	11	0.113625		Q6Q788	41 kDa	8
97	Desmoglein-1 OS=Homo sapiens GN=DSG1 PE=1 SV=2	11	0.113625		Q02413	114 kDa	6
98	Ig kappa chain V-II region TEW OS=Homo sapiens PE=1 SV=1	11	0.113625		P01617	12 kDa	2
99	Lactotransferrin OS=Homo sapiens GN=LTF PE=1 SV=1	11	0.113625		E7ER44	78 kDa	10
100	Phosphatidylinositol-glycan-specific phospholipase D OS=Homo sapiens GN=GPLD1 PE=1 SV=3	11	0.113625		P80108	92 kDa	6
101	C4b-binding protein beta chain OS=Homo sapiens GN=C4BPB PE=1 SV=1	10	0.103295		P20851	28 kDa	3
102	Caspase-14 OS=Homo sapiens GN=CASP14 PE=1 SV=2	10	0.103295		P31944	28 kDa	6
103	Filaggrin-2 OS=Homo sapiens GN=FLG2 PE=1 SV=1	10	0.103295		Q5D862	248 kDa	4
104	Isoform F of Proteoglycan 4 OS=Homo sapiens GN=PRG4	10	0.103295		Q92954-6	146 kDa	10
105	Protein AMBP OS=Homo sapiens GN=AMBP PE=1 SV=1	10	0.103295		P02760	39 kDa	5
106	CD5 antigen-like OS=Homo sapiens GN=CD5L PE=1 SV=1	9	0.0929656		O43866	38 kDa	5
107	Complement component C8 gamma chain OS=Homo sapiens GN=C8G PE=1 SV=3	9	0.0929656		P07360	22 kDa	4
108	Desmoplakin OS=Homo sapiens GN=DSP PE=1 SV=3	9	0.0929656		P15924	332 kDa	7
109	Fibrinogen alpha chain OS=Homo sapiens GN=FGA PE=1 SV=2	9	0.0929656		P02671	95 kDa	6
110	Ig kappa chain V-I region DEE OS=Homo sapiens PE=1 SV=1	9	0.0929656		P01597	12 kDa	2
111	Mannosyl-oligosaccharide 1,2-alpha-mannosidase IA OS=Homo sapiens GN=MAN1A1 PE=1 SV=3	9	0.0929656		P33908	73 kDa	6
112	Pigment epithelium-derived factor OS=Homo sapiens GN=SERPINF1 PE=1 SV=4	9	0.0929656		P36955	46 kDa	7
113	Procollagen C-endopeptidase enhancer 1 OS=Homo sapiens GN=PCOLCE PE=1 SV=2	9	0.0929656		Q15113	48 kDa	4
114	Protein IGHV5-51 (Fragment) OS=Homo sapiens GN=IGHV5-51 PE=1 SV=1	9	0.0929656		A0A0C4DH38	13 kDa	3
115	Apolipoprotein C-IV OS=Homo sapiens GN=APOC4 PE=1 SV=1	8	0.0826361		P55056	15 kDa	4
116	Apolipoprotein M OS=Homo sapiens GN=APOM PE=1 SV=2	8	0.0826361		O95445	21 kDa	3
117	Cathelicidin antimicrobial peptide OS=Homo sapiens GN=CAMP PE=1 SV=1	8	0.0826361		J3KNB4	20 kDa	6
118	Fructose-bisphosphate aldolase OS=Homo sapiens GN=ALDOA PE=1 SV=1	8	0.0826361		J3KPS3 (+2)	40 kDa	5
119	Hemoglobin subunit beta OS=Homo sapiens GN=HBB PE=1 SV=2	8	0.0826361		P68871	16 kDa	4
120	IgGFc-binding protein OS=Homo sapiens GN=FCGBP PE=1 SV=3	8	0.0826361		Q9Y6R7	572 kDa	8
121	Isoform C of Fibulin-1 OS=Homo sapiens GN=FBLN1	8	0.0826361		P23142-4	74 kDa	2
122	Kallistatin OS=Homo sapiens GN=SERPINA4 PE=1 SV=3	8	0.0826361		P29622	49 kDa	4
123	Phospholipid transfer protein OS=Homo sapiens GN=PLTP PE=1 SV=1	8	0.0826361		P55058	55 kDa	4
124	Trypsin-1 OS=Homo sapiens GN=PRSS1 PE=1 SV=1	8	0.0826361		P07477	27 kDa	2
125	Vitamin D-binding protein OS=Homo sapiens GN=GC PE=1 SV=1	8	0.0826361		P02774 (+1)	53 kDa	6
126	Fibrinogen beta chain OS=Homo sapiens GN=FGB PE=1 SV=2	7	0.0723066		P02675	56 kDa	3
127	Fibulin-1 OS=Homo sapiens GN=FBLN1 PE=1 SV=4	7	0.0723066		P23142	77 kDa	4
128	Moesin OS=Homo sapiens GN=MSN PE=1 SV=3	7	0.0723066		P26038	68 kDa	5
129	Protein IGHV3-74 (Fragment) OS=Homo sapiens GN=IGHV3-74 PE=1 SV=1	7	0.0723066		A0A0B4J1X5	13 kDa	2
130	Secreted phosphoprotein 24 OS=Homo sapiens GN=SPP2 PE=1 SV=1	7	0.0723066		Q13103	24 kDa	4
131	Tetranectin OS=Homo sapiens GN=CLEC3B PE=1 SV=1	7	0.0723066		E9PHK0	18 kDa	2
132	Transforming growth factor-beta-induced protein ig-h3 OS=Homo sapiens GN=TGFBI PE=1 SV=1	7	0.0723066		Q15582	75 kDa	5
133	Actin, alpha cardiac muscle 1 OS=Homo sapiens GN=ACTC1 PE=1 SV=1	6	0.0619771		P68032	42 kDa	3
134	Alpha-2-HS-glycoprotein OS=Homo sapiens GN=AHSG PE=1 SV=1	6	0.0619771		P02765	39 kDa	5
135	Angiopoietin-related protein 3 OS=Homo sapiens GN=ANGPTL3 PE=1 SV=1	6	0.0619771		Q9Y5C1	54 kDa	4
136	Endoplasmin OS=Homo sapiens GN=HSP90B1 PE=1 SV=1	6	0.0619771		P14625	92 kDa	4
137	Heat shock 70 kDa protein 1A OS=Homo sapiens GN=HSPA1A PE=1 SV=1	6	0.0619771		P0DMV8 (+1)	70 kDa	3
138	Insulin-like growth factor-binding protein 2 OS=Homo sapiens GN=IGFBP2 PE=1 SV=2	6	0.0619771		P18065	35 kDa	6
139	Inter-alpha-trypsin inhibitor heavy chain H3 OS=Homo sapiens GN=ITIH3 PE=1 SV=2	6	0.0619771		Q06033 (+1)	100 kDa	4
140	Isoform 2 of N-acetylmuramoyl-L-alanine amidase OS=Homo sapiens GN=PGLYRP2	6	0.0619771		Q96PD5-2	68 kDa	3
141	Protein IGLV3-21 (Fragment) OS=Homo sapiens GN=IGLV3-21 PE=1 SV=1	6	0.0619771		A0A075B6J7	12 kDa	2
142	Serum paraoxonase/lactonase 3 OS=Homo sapiens GN=PON3 PE=1 SV=3	6	0.0619771		Q15166	40 kDa	2
143	Alpha-1-acid glycoprotein 1 OS=Homo sapiens GN=ORM1 PE=1 SV=1	5	0.0516476		P02763	24 kDa	2
144	Beta-Ala-His dipeptidase OS=Homo sapiens GN=CNDP1 PE=1 SV=4	5	0.0516476		Q96KN2	57 kDa	5
145	Complement factor H-related protein 3 OS=Homo sapiens GN=CFHR3 PE=1 SV=2	5	0.0516476		Q02985	37 kDa	2
146	Complement factor I OS=Homo sapiens GN=CFI PE=1 SV=1	5	0.0516476		E7ETH0	67 kDa	3
147	Extracellular matrix protein 1 OS=Homo sapiens GN=ECM1 PE=1 SV=2	5	0.0516476		Q16610 (+1)	61 kDa	3
148	Ficolin-3 OS=Homo sapiens GN=FCN3 PE=1 SV=2	5	0.0516476		O75636	33 kDa	3
149	Heat shock cognate 71 kDa protein OS=Homo sapiens GN=HSPA8 PE=1 SV=1	5	0.0516476		E9PKE3	69 kDa	2
150	Ig kappa chain V-III region B6 OS=Homo sapiens PE=1 SV=1	5	0.0516476		P01619	12 kDa	2
151	Isoform 3 of Cartilage acidic protein 1 OS=Homo sapiens GN=CRTAC1	5	0.0516476		Q9NQ79-3	68 kDa	5
152	Isoform 3 of Collagen alpha-1(XVIII) chain OS=Homo sapiens GN=COL18A1	5	0.0516476		P39060-2	136 kDa	3
153	Isoform 3 of L-lactate dehydrogenase A chain OS=Homo sapiens GN=LDHA	5	0.0516476		P00338-3	40 kDa	4
154	Keratinocyte proline-rich protein OS=Homo sapiens GN=KPRP PE=1 SV=1	5	0.0516476		Q5T749	64 kDa	2
155	Mannose-binding protein C OS=Homo sapiens GN=MBL2 PE=1 SV=2	5	0.0516476		P11226	26 kDa	5
156	Phosphoglycerate kinase 1 OS=Homo sapiens GN=PGK1 PE=1 SV=3	5	0.0516476		P00558	45 kDa	5
157	Protein IGLV3-25 (Fragment) OS=Homo sapiens GN=IGLV3-25 PE=1 SV=2	5	0.0516476		A0A075B6J4	12 kDa	2
158	Retinoic acid receptor responder protein 2 OS=Homo sapiens GN=RARRES2 PE=1 SV=1	5	0.0516476		Q99969	19 kDa	2
159	Adipocyte plasma membrane-associated protein OS=Homo sapiens GN=APMAP PE=1 SV=2	4	0.041318		Q9HDC9	46 kDa	3
160	Afamin OS=Homo sapiens GN=AFM PE=1 SV=1	4	0.041318		P43652	69 kDa	4
161	Cartilage oligomeric matrix protein OS=Homo sapiens GN=COMP PE=1 SV=1	4	0.041318		G3XAP6 (+2)	80 kDa	3
162	Catalase OS=Homo sapiens GN=CAT PE=1 SV=3	4	0.041318		P04040	60 kDa	3
163	Coagulation factor VII OS=Homo sapiens GN=F7 PE=1 SV=1	4	0.041318		P08709 (+1)	52 kDa	2
164	Creatine kinase M-type OS=Homo sapiens GN=CKM PE=1 SV=2	4	0.041318		P06732	43 kDa	2
165	Fructose-bisphosphate aldolase B OS=Homo sapiens GN=ALDOB PE=1 SV=2	4	0.041318		P05062	39 kDa	4
166	Isoform 2 of Filamin-A OS=Homo sapiens GN=FLNA	4	0.041318		P21333-2 (+1)	280 kDa	4
167	Junction plakoglobin OS=Homo sapiens GN=JUP PE=1 SV=3	4	0.041318		P14923	82 kDa	4
168	Proprotein convertase subtilisin/kexin type 9 OS=Homo sapiens GN=PCSK9 PE=1 SV=3	4	0.041318		Q8NBP7	74 kDa	2
169	Protein IGLV3-19 (Fragment) OS=Homo sapiens GN=IGLV3-19 PE=1 SV=1	4	0.041318		A0A075B6J8	12 kDa	3
170	Protein IGLV6-57 OS=Homo sapiens GN=IGLV6-57 PE=1 SV=2	4	0.041318		A0A075B6I2	16 kDa	2
171	Ribonuclease 4 OS=Homo sapiens GN=RNASE4 PE=1 SV=3	4	0.041318		P34096	17 kDa	2
172	Suprabasin OS=Homo sapiens GN=SBSN PE=1 SV=2	4	0.041318		Q6UWP8	61 kDa	2
173	6-phosphogluconate dehydrogenase, decarboxylating OS=Homo sapiens GN=PGD PE=1 SV=3	3	0.0309885		P52209	53 kDa	2
174	Angiogenin OS=Homo sapiens GN=ANG PE=1 SV=1	3	0.0309885		P03950	17 kDa	3
175	Carboxypeptidase N subunit 2 OS=Homo sapiens GN=CPN2 PE=1 SV=3	3	0.0309885		P22792	61 kDa	2
176	Cholesteryl ester transfer protein OS=Homo sapiens GN=CETP PE=1 SV=2	3	0.0309885		P11597	55 kDa	3
177	Ficolin-1 OS=Homo sapiens GN=FCN1 PE=1 SV=2	3	0.0309885		O00602	35 kDa	3
178	Flavin reductase (NADPH) OS=Homo sapiens GN=BLVRB PE=1 SV=3	3	0.0309885		P30043	22 kDa	2
179	Galectin-3-binding protein OS=Homo sapiens GN=LGALS3BP PE=1 SV=1	3	0.0309885		Q08380	65 kDa	2
180	Ig lambda chain V-I region NEW OS=Homo sapiens PE=1 SV=1	3	0.0309885		P01701	11 kDa	2
181	Isoform 2 of Anthrax toxin receptor 2 OS=Homo sapiens GN=ANTXR2	3	0.0309885		P58335-2	43 kDa	2
182	Isoform 3 of Complement C1q tumor necrosis factor-related protein 3 OS=Homo sapiens GN=C1QTNF3	3	0.0309885		Q9BXJ4-3	35 kDa	3
183	L-lactate dehydrogenase B chain OS=Homo sapiens GN=LDHB PE=1 SV=2	3	0.0309885		P07195	37 kDa	2
184	Lysozyme C OS=Homo sapiens GN=LYZ PE=1 SV=1	3	0.0309885		P61626	17 kDa	2
185	Nicotinate phosphoribosyltransferase (Fragment) OS=Homo sapiens GN=NAPRT PE=1 SV=1	3	0.0309885		H0YDA6	14 kDa	3
186	Alpha-1B-glycoprotein OS=Homo sapiens GN=A1BG PE=1 SV=4	2	0.020659		P04217	54 kDa	2
187	Alpha-enolase OS=Homo sapiens GN=ENO1 PE=1 SV=2	2	0.020659		P06733	47 kDa	2
188	Cadherin-1 OS=Homo sapiens GN=CDH1 PE=1 SV=1	2	0.020659		A0A087WXI5	100 kDa	2
189	Calsyntenin-1 OS=Homo sapiens GN=CLSTN1 PE=1 SV=1	2	0.020659		O94985 (+1)	110 kDa	2
190	Cathepsin S OS=Homo sapiens GN=CTSS PE=1 SV=3	2	0.020659		P25774	37 kDa	2
191	Coagulation factor XIII A chain OS=Homo sapiens GN=F13A1 PE=1 SV=4	2	0.020659		P00488	83 kDa	2
192	Corticosteroid-binding globulin OS=Homo sapiens GN=SERPINA6 PE=1 SV=1	2	0.020659		P08185	45 kDa	2
193	C-reactive protein OS=Homo sapiens GN=CRP PE=1 SV=1	2	0.020659		P02741	25 kDa	2
194	Extracellular superoxide dismutase [Cu-Zn] OS=Homo sapiens GN=SOD3 PE=1 SV=2	2	0.020659		P08294	26 kDa	2
195	Hemoglobin subunit alpha OS=Homo sapiens GN=HBA1 PE=1 SV=2	2	0.020659		P69905	15 kDa	2
196	Insulin-like growth factor-binding protein 5 OS=Homo sapiens GN=IGFBP5 PE=1 SV=1	2	0.020659		P24593	31 kDa	2
197	Insulin-like growth factor-binding protein 7 OS=Homo sapiens GN=IGFBP7 PE=1 SV=1	2	0.020659		Q16270 (+1)	29 kDa	2
198	Isoform 3 of Leukotriene A-4 hydrolase OS=Homo sapiens GN=LTA4H	2	0.020659		P09960-3	57 kDa	2
199	Multimerin-2 OS=Homo sapiens GN=MMRN2 PE=1 SV=2	2	0.020659		Q9H8L6	104 kDa	2
200	Neutral alpha-glucosidase AB OS=Homo sapiens GN=GANAB PE=1 SV=3	2	0.020659		Q14697	107 kDa	2
201	Olfactomedin-like protein 3 OS=Homo sapiens GN=OLFML3 PE=2 SV=1	2	0.020659		Q9NRN5	46 kDa	2
202	Peptidyl-prolyl cis-trans isomerase B OS=Homo sapiens GN=PPIB PE=1 SV=2	2	0.020659		P23284	24 kDa	2
203	Peroxiredoxin-1 OS=Homo sapiens GN=PRDX1 PE=1 SV=1	2	0.020659		Q06830	22 kDa	2
204	Platelet-activating factor acetylhydrolase OS=Homo sapiens GN=PLA2G7 PE=1 SV=1	2	0.020659		Q13093	50 kDa	2
205	Protein TKFC OS=Homo sapiens GN=TKFC PE=1 SV=1	2	0.020659		A0A087WUL0 (+1)	59 kDa	2
206	Serpin A11 OS=Homo sapiens GN=SERPINA11 PE=2 SV=2	2	0.020659		Q86U17	47 kDa	2
207	Serum amyloid P-component OS=Homo sapiens GN=APCS PE=1 SV=2	2	0.020659		P02743	25 kDa	2
208	Talin-1 OS=Homo sapiens GN=TLN1 PE=1 SV=3	2	0.020659		Q9Y490	270 kDa	2
209	Tetratricopeptide repeat protein 25 OS=Homo sapiens GN=TTC25 PE=1 SV=1	2	0.020659		A0A087WYN4 (+1)	76 kDa	2
210	Transcobalamin-2 OS=Homo sapiens GN=TCN2 PE=1 SV=1	2	0.020659		B5MBX2 (+2)	47 kDa	2
211	Vinculin OS=Homo sapiens GN=VCL PE=1 SV=4	2	0.020659		P18206 (+1)	124 kDa	2
		9681	100

## Sheet: L1400 MagSep
Number	Identified Proteins	L1400 MagSep	Relative abundance (%)	Sum	Accession Number	Molecular Weight	L1400 Peptide Count
1	Serum albumin OS=Homo sapiens GN=ALB PE=1 SV=2	930	7.07171		P02768	69 kDa	87
2	Fibrinogen beta chain OS=Homo sapiens GN=FGB PE=1 SV=2	669	5.08707	13151	P02675	56 kDa	74
3	Complement C3 OS=Homo sapiens GN=C3 PE=1 SV=2	636	4.83613		P01024	187 kDa	126
4	Fibrinogen gamma chain OS=Homo sapiens GN=FGG PE=1 SV=3	526	3.9997		P02679 (+1)	52 kDa	65
5	Complement factor H OS=Homo sapiens GN=CFH PE=1 SV=4	505	3.84001		P08603	139 kDa	95
6	Apolipoprotein B-100 OS=Homo sapiens GN=APOB PE=1 SV=2	504	3.83241		P04114	516 kDa	230
7	Complement C4-A OS=Homo sapiens GN=C4A PE=1 SV=2	463	3.52064		P0C0L4	193 kDa	126
8	Complement C4-B OS=Homo sapiens GN=C4B PE=1 SV=2	459	3.49023		P0C0L5	193 kDa	4
9	Fibrinogen alpha chain OS=Homo sapiens GN=FGA PE=1 SV=2	445	3.38377		P02671 (+1)	95 kDa	55
10	Ig gamma-1 chain C region OS=Homo sapiens GN=IGHG1 PE=1 SV=1	341	2.59296		P01857	36 kDa	50
11	Fibronectin OS=Homo sapiens GN=FN1 PE=1 SV=4	339	2.57775		P02751	263 kDa	124
12	Ceruloplasmin OS=Homo sapiens GN=CP PE=1 SV=1	295	2.24318		P00450	122 kDa	69
13	Ig kappa chain C region OS=Homo sapiens GN=IGKC PE=1 SV=1	274	2.08349		P01834	12 kDa	25
14	Complement component C9 OS=Homo sapiens GN=C9 PE=1 SV=2	269	2.04547		P02748	63 kDa	45
15	C4b-binding protein alpha chain OS=Homo sapiens GN=C4BPA PE=1 SV=2	223	1.69569		P04003	67 kDa	44
16	Ig gamma-3 chain C region OS=Homo sapiens GN=IGHG3 PE=1 SV=2	210	1.59684		P01860	41 kDa	11
17	Complement factor H OS=Homo sapiens GN=CFH PE=2 SV=1	206	1.56642		F8WDX4	51 kDa	2
18	Complement C1r subcomponent OS=Homo sapiens GN=C1R PE=1 SV=2	203	1.54361		P00736	80 kDa	43
19	Complement C1s subcomponent OS=Homo sapiens GN=C1S PE=1 SV=1	190	1.44476		P09871	77 kDa	38
20	Beta-2-glycoprotein 1 OS=Homo sapiens GN=APOH PE=1 SV=3	155	1.17862		P02749	38 kDa	37
21	Ig gamma-2 chain C region OS=Homo sapiens GN=IGHG2 PE=1 SV=2	136	1.03414		P01859	36 kDa	5
22	Haptoglobin OS=Homo sapiens GN=HP PE=1 SV=1	128	0.97331		P00738	45 kDa	37
23	Plasminogen OS=Homo sapiens GN=PLG PE=1 SV=2	127	0.965706		P00747	91 kDa	42
24	Ig gamma-4 chain C region OS=Homo sapiens GN=IGHG4 PE=1 SV=1	125	0.950498		P01861	36 kDa	3
25	Alpha-2-macroglobulin OS=Homo sapiens GN=A2M PE=1 SV=3	120	0.912478		P01023	163 kDa	56
26	Complement factor H-related protein 1 OS=Homo sapiens GN=CFHR1 PE=1 SV=2	115	0.874458		Q03591	38 kDa	15
27	Serotransferrin OS=Homo sapiens GN=TF PE=1 SV=3	113	0.85925		P02787	77 kDa	35
28	Complement factor B OS=Homo sapiens GN=CFB PE=2 SV=1	110	0.836438		B4E1Z4	141 kDa	37
29	Alpha-1-antitrypsin OS=Homo sapiens GN=SERPINA1 PE=1 SV=3	108	0.82123		P01009	47 kDa	25
30	Kaliocin-1 (Fragment) OS=Homo sapiens GN=LTF PE=1 SV=1	108	0.82123		E7EQB2 (+2)	77 kDa	45
31	Plasma kallikrein heavy chain (Fragment) OS=Homo sapiens GN=KLKB1 PE=3 SV=1	108	0.82123		H0YAC1 (+1)	77 kDa	47
32	Gelsolin OS=Homo sapiens GN=GSN PE=1 SV=1	107	0.813626		P06396	86 kDa	33
33	Histidine-rich glycoprotein OS=Homo sapiens GN=HRG PE=1 SV=1	107	0.813626		P04196	60 kDa	23
34	Complement C1q subcomponent subunit B OS=Homo sapiens GN=C1QB PE=2 SV=1	103	0.78321		D6R934 (+1)	26 kDa	13
35	Apolipoprotein A-I OS=Homo sapiens GN=APOA1 PE=1 SV=1	93	0.707171		P02647	31 kDa	21
36	Alpha-2-HS-glycoprotein OS=Homo sapiens GN=AHSG PE=1 SV=1	91	0.691963		P02765	39 kDa	19
37	Prothrombin OS=Homo sapiens GN=F2 PE=1 SV=2	87	0.661547		P00734	70 kDa	24
38	Isoform LMW of Kininogen-1 OS=Homo sapiens GN=KNG1	84	0.638735		P01042-2	48 kDa	22
39	Isoform C of Proteoglycan 4 OS=Homo sapiens GN=PRG4	79	0.600715		Q92954-3	141 kDa	2
40	Pigment epithelium-derived factor OS=Homo sapiens GN=SERPINF1 PE=1 SV=4	79	0.600715		P36955	46 kDa	29
41	C-reactive protein OS=Homo sapiens GN=CRP PE=1 SV=1	77	0.585507		P02741	25 kDa	16
42	Isoform F of Proteoglycan 4 OS=Homo sapiens GN=PRG4	77	0.585507		Q92954-6	146 kDa	39
43	Protein S100-A8 OS=Homo sapiens GN=S100A8 PE=1 SV=1	68	0.517071		P05109	11 kDa	12
44	Coagulation factor XII OS=Homo sapiens GN=F12 PE=1 SV=3	65	0.494259		P00748	68 kDa	24
45	Plasma protease C1 inhibitor OS=Homo sapiens GN=SERPING1 PE=2 SV=1	65	0.494259		B4E1F0 (+2)	56 kDa	20
46	Complement C1q subcomponent subunit A OS=Homo sapiens GN=C1QA PE=1 SV=2	63	0.479051		P02745	26 kDa	11
47	Protein S100-A9 OS=Homo sapiens GN=S100A9 PE=1 SV=1	63	0.479051		P06702	13 kDa	12
48	Apolipoprotein E OS=Homo sapiens GN=APOE PE=1 SV=1	62	0.471447		P02649	36 kDa	20
49	Ig mu chain C region OS=Homo sapiens GN=IGHM PE=1 SV=3	60	0.456239		P01871 (+1)	49 kDa	17
50	Vitronectin OS=Homo sapiens GN=VTN PE=1 SV=1	60	0.456239		P04004	54 kDa	21
51	Complement C1q subcomponent subunit C OS=Homo sapiens GN=C1QC PE=1 SV=3	59	0.448635		P02747	26 kDa	9
52	Hornerin OS=Homo sapiens GN=HRNR PE=1 SV=2	57	0.433427		Q86YZ3	282 kDa	20
53	Ig lambda-2 chain C regions OS=Homo sapiens GN=IGLC2 PE=1 SV=1	56	0.425823		P0CG05	11 kDa	3
54	Ig alpha-1 chain C region OS=Homo sapiens GN=IGHA1 PE=1 SV=2	54	0.410615		P01876	38 kDa	16
55	Inter-alpha-trypsin inhibitor heavy chain H2 OS=Homo sapiens GN=ITIH2 PE=1 SV=2	52	0.395407		P19823 (+1)	106 kDa	25
56	Immunoglobulin lambda-like polypeptide 5 OS=Homo sapiens GN=IGLL5 PE=2 SV=2	51	0.387803		B9A064	23 kDa	17
57	Alpha-1-antichymotrypsin OS=Homo sapiens GN=SERPINA3 PE=1 SV=2	50	0.380199		P01011	48 kDa	20
58	Complement C5 OS=Homo sapiens GN=C5 PE=1 SV=4	50	0.380199		P01031	188 kDa	32
59	Hemoglobin subunit beta OS=Homo sapiens GN=HBB PE=1 SV=2	50	0.380199		P68871	16 kDa	21
60	Complement factor H-related protein 2 OS=Homo sapiens GN=CFHR2 PE=1 SV=1	49	0.372595		P36980 (+1)	31 kDa	5
61	Procollagen C-endopeptidase enhancer 1 OS=Homo sapiens GN=PCOLCE PE=1 SV=2	48	0.364991		Q15113	48 kDa	20
62	Tenascin OS=Homo sapiens GN=TNC PE=1 SV=3	48	0.364991		P24821	241 kDa	38
63	Complement component C8 beta chain OS=Homo sapiens GN=C8B PE=2 SV=1	46	0.349783		F5GY80 (+2)	60 kDa	19
64	Inter-alpha-trypsin inhibitor heavy chain H1 OS=Homo sapiens GN=ITIH1 PE=1 SV=3	46	0.349783		P19827	101 kDa	20
65	Collagen alpha-1(I) chain OS=Homo sapiens GN=COL1A1 PE=1 SV=5	44	0.334575		P02452	139 kDa	20
66	Serum amyloid P-component OS=Homo sapiens GN=APCS PE=1 SV=2	42	0.319367		P02743	25 kDa	12
67	Lipopolysaccharide-binding protein OS=Homo sapiens GN=LBP PE=1 SV=3	41	0.311763		P18428	53 kDa	15
68	Lysozyme C OS=Homo sapiens GN=LYZ PE=1 SV=1	39	0.296555		P61626	17 kDa	15
69	Antithrombin-III OS=Homo sapiens GN=SERPINC1 PE=1 SV=1	38	0.288951		P01008	53 kDa	16
70	Complement component C6 OS=Homo sapiens GN=C6 PE=1 SV=3	37	0.281347		P13671	105 kDa	24
71	Ig kappa chain V-III region HAH OS=Homo sapiens PE=2 SV=1	37	0.281347		P18135	14 kDa	12
72	Complement component C8 gamma chain OS=Homo sapiens GN=C8G PE=1 SV=3	35	0.266139		P07360	22 kDa	12
73	Collagen alpha-1(XII) chain OS=Homo sapiens GN=COL12A1 PE=1 SV=1	34	0.258535		D6RGG3 (+2)	333 kDa	24
74	Vitamin D-binding protein OS=Homo sapiens GN=GC PE=1 SV=1	34	0.258535		P02774 (+1)	53 kDa	14
75	Complement factor H-related protein 3 OS=Homo sapiens GN=CFHR3 PE=1 SV=2	33	0.250931		Q02985	37 kDa	6
76	Sulfhydryl oxidase 1 OS=Homo sapiens GN=QSOX1 PE=1 SV=3	33	0.250931		O00391 (+1)	83 kDa	23
77	Complement component C7 OS=Homo sapiens GN=C7 PE=1 SV=2	32	0.243328		P10643	94 kDa	18
78	Tetranectin OS=Homo sapiens GN=CLEC3B PE=4 SV=1	32	0.243328		E9PHK0 (+1)	18 kDa	11
79	Ig lambda-7 chain C region OS=Homo sapiens GN=IGLC7 PE=1 SV=2	31	0.235724		A0M8Q6	11 kDa	2
80	Complement component C8 alpha chain OS=Homo sapiens GN=C8A PE=1 SV=2	30	0.22812		P07357	65 kDa	18
81	Hemopexin OS=Homo sapiens GN=HPX PE=1 SV=2	28	0.212912		P02790	52 kDa	12
82	Actin, cytoplasmic 1 OS=Homo sapiens GN=ACTB PE=1 SV=1	26	0.197704		P60709	42 kDa	14
83	Apolipoprotein(a) OS=Homo sapiens GN=LPA PE=1 SV=1	26	0.197704		P08519	501 kDa	18
84	Annexin A1 OS=Homo sapiens GN=ANXA1 PE=1 SV=2	25	0.1901		P04083	39 kDa	15
85	Collagen alpha-2(I) chain OS=Homo sapiens GN=COL1A2 PE=1 SV=7	24	0.182496		P08123	129 kDa	15
86	Alpha-2-antiplasmin OS=Homo sapiens GN=SERPINF2 PE=1 SV=3	23	0.174892		P08697	55 kDa	9
87	Alpha-enolase OS=Homo sapiens GN=ENO1 PE=1 SV=2	21	0.159684		P06733	47 kDa	14
88	Complement factor D OS=Homo sapiens GN=CFD PE=2 SV=1	20	0.15208		K7ERG9 (+1)	28 kDa	12
89	Hemoglobin subunit alpha OS=Homo sapiens GN=HBA1 PE=1 SV=2	19	0.144476		P69905	15 kDa	9
90	Alpha-1-acid glycoprotein 1 OS=Homo sapiens GN=ORM1 PE=1 SV=1	18	0.136872		P02763	24 kDa	7
91	Apolipoprotein A-II OS=Homo sapiens GN=APOA2 PE=1 SV=1	18	0.136872		P02652 (+1)	11 kDa	7
92	Complement factor H-related protein 5 OS=Homo sapiens GN=CFHR5 PE=2 SV=1	18	0.136872		Q5VYL6 (+1)	67 kDa	7
93	Isoform 2 of Inter-alpha-trypsin inhibitor heavy chain H4 OS=Homo sapiens GN=ITIH4	18	0.136872		Q14624-2 (+2)	101 kDa	13
94	Isoform 4 of Collagen alpha-3(VI) chain OS=Homo sapiens GN=COL6A3	18	0.136872		P12111-4	278 kDa	15
95	Tenascin-X OS=Homo sapiens GN=TNXB PE=2 SV=1	18	0.136872		E7EPZ9 (+2)	458 kDa	14
96	Thrombospondin-1 OS=Homo sapiens GN=THBS1 PE=1 SV=2	18	0.136872		P07996	129 kDa	12
97	Moesin OS=Homo sapiens GN=MSN PE=1 SV=3	17	0.129268		P26038	68 kDa	13
98	Clusterin OS=Homo sapiens GN=CLU PE=1 SV=1	16	0.121664		P10909 (+3)	52 kDa	10
99	Glyceraldehyde-3-phosphate dehydrogenase OS=Homo sapiens GN=GAPDH PE=1 SV=3	16	0.121664		P04406 (+1)	36 kDa	8
100	Transforming growth factor-beta-induced protein ig-h3 OS=Homo sapiens GN=TGFBI PE=2 SV=1	16	0.121664		G8JLA8 (+1)	75 kDa	14
101	Phospholipid transfer protein OS=Homo sapiens GN=PLTP PE=1 SV=1	15	0.11406		B3KUE5 (+1)	57 kDa	9
102	Properdin OS=Homo sapiens GN=CFP PE=1 SV=2	15	0.11406		P27918	51 kDa	9
103	Serum amyloid A-1 protein OS=Homo sapiens GN=SAA1 PE=1 SV=1	15	0.11406		P0DJI8	14 kDa	8
104	Cofilin-1 OS=Homo sapiens GN=CFL1 PE=1 SV=3	14	0.106456		P23528	19 kDa	11
105	Pyruvate kinase (Fragment) OS=Homo sapiens GN=PKM PE=1 SV=1	14	0.106456		H3BTN5 (+2)	53 kDa	8
106	Transthyretin OS=Homo sapiens GN=TTR PE=1 SV=1	14	0.106456		P02766	16 kDa	8
107	Angiogenin OS=Homo sapiens GN=ANG PE=1 SV=1	12	0.0912478		P03950	17 kDa	7
108	Carboxypeptidase B2 OS=Homo sapiens GN=CPB2 PE=1 SV=2	12	0.0912478		Q96IY4	48 kDa	7
109	Cartilage intermediate layer protein 1 OS=Homo sapiens GN=CILP PE=1 SV=4	12	0.0912478		O75339	133 kDa	12
110	Coagulation factor XI OS=Homo sapiens GN=F11 PE=1 SV=1	12	0.0912478		P03951	70 kDa	10
111	Ig heavy chain V-III region BRO OS=Homo sapiens PE=1 SV=1	12	0.0912478		P01766	13 kDa	3
112	Insulin-like growth factor-binding protein complex acid labile subunit OS=Homo sapiens GN=IGFALS PE=1 SV=1	12	0.0912478		P35858 (+1)	66 kDa	12
113	Protein AMBP OS=Homo sapiens GN=AMBP PE=1 SV=1	12	0.0912478		P02760	39 kDa	6
114	Chitinase-3-like protein 1 OS=Homo sapiens GN=CHI3L1 PE=1 SV=2	11	0.0836438		P36222	43 kDa	9
115	Collagen alpha-1(V) chain OS=Homo sapiens GN=COL5A1 PE=1 SV=3	11	0.0836438		P20908	184 kDa	7
116	Neutrophil defensin 1 OS=Homo sapiens GN=DEFA1 PE=1 SV=1	11	0.0836438		P59665 (+1)	10 kDa	3
117	Hyaluronan-binding protein 2 OS=Homo sapiens GN=HABP2 PE=1 SV=1	10	0.0760398		Q14520 (+1)	63 kDa	7
118	Isoform H7 of Myeloperoxidase OS=Homo sapiens GN=MPO	10	0.0760398		P05164-3	87 kDa	8
119	Keratinocyte proline-rich protein OS=Homo sapiens GN=KPRP PE=1 SV=1	10	0.0760398		Q5T749	64 kDa	7
120	Phosphoglycerate kinase OS=Homo sapiens GN=PGK1 PE=1 SV=1	10	0.0760398		B7Z7A9 (+1)	41 kDa	8
121	Serum amyloid A-4 protein OS=Homo sapiens GN=SAA4 PE=1 SV=2	10	0.0760398		P35542	15 kDa	6
122	Vitamin K-dependent protein S OS=Homo sapiens GN=PROS1 PE=1 SV=1	10	0.0760398		P07225	75 kDa	6
123	Annexin A2 OS=Homo sapiens GN=ANXA2 PE=1 SV=2	9	0.0684359		P07355 (+1)	39 kDa	6
124	Azurocidin OS=Homo sapiens GN=AZU1 PE=1 SV=3	9	0.0684359		P20160	27 kDa	7
125	Heat shock 70 kDa protein 1A/1B OS=Homo sapiens GN=HSPA1A PE=1 SV=5	9	0.0684359		P08107 (+1)	70 kDa	4
126	Ig kappa chain V-III region VG (Fragment) OS=Homo sapiens PE=1 SV=1	9	0.0684359		P04433	13 kDa	5
127	Isoform 12 of Titin OS=Homo sapiens GN=TTN	9	0.0684359		Q8WZ42-12	3994 kDa	9
128	Isoform 2 of C4b-binding protein beta chain OS=Homo sapiens GN=C4BPB	9	0.0684359		P20851-2	28 kDa	6
129	Leukocyte elastase inhibitor OS=Homo sapiens GN=SERPINB1 PE=1 SV=1	9	0.0684359		P30740	43 kDa	8
130	Metalloproteinase inhibitor 1 OS=Homo sapiens GN=TIMP1 PE=1 SV=1	9	0.0684359		P01033 (+1)	23 kDa	7
131	Serum paraoxonase/arylesterase 1 OS=Homo sapiens GN=PON1 PE=1 SV=3	9	0.0684359		P27169	40 kDa	9
132	Trypsin-2 OS=Homo sapiens GN=PRSS2 PE=1 SV=1	9	0.0684359		P07478	26 kDa	3
133	Cathepsin B OS=Homo sapiens GN=CTSB PE=1 SV=3	8	0.0608319		P07858	38 kDa	7
134	CD5 antigen-like OS=Homo sapiens GN=CD5L PE=1 SV=1	8	0.0608319		O43866	38 kDa	8
135	Eosinophil cationic protein OS=Homo sapiens GN=RNASE3 PE=1 SV=2	8	0.0608319		P12724	18 kDa	6
136	6-phosphogluconate dehydrogenase, decarboxylating OS=Homo sapiens GN=PGD PE=1 SV=1	7	0.0532279		B4DQJ8 (+1)	52 kDa	5
137	Apolipoprotein D (Fragment) OS=Homo sapiens GN=APOD PE=2 SV=1	7	0.0532279		C9JF17 (+1)	24 kDa	4
138	Collagen alpha-1(III) chain OS=Homo sapiens GN=COL3A1 PE=2 SV=1	7	0.0532279		E7ENY8 (+2)	112 kDa	6
139	Complement factor I light chain OS=Homo sapiens GN=CFI PE=2 SV=1	7	0.0532279		E7ETH0 (+2)	67 kDa	6
140	Cystatin-C OS=Homo sapiens GN=CST3 PE=1 SV=1	7	0.0532279		P01034	16 kDa	4
141	Dermcidin OS=Homo sapiens GN=DCD PE=1 SV=2	7	0.0532279		P81605 (+1)	11 kDa	2
142	Histone H2A type 1-B/E OS=Homo sapiens GN=HIST1H2AB PE=1 SV=2	7	0.0532279		P04908 (+9)	14 kDa	5
143	Ig lambda chain V-I region WAH OS=Homo sapiens PE=1 SV=1	7	0.0532279		P04208	12 kDa	4
144	Laminin subunit alpha-4 OS=Homo sapiens GN=LAMA4 PE=1 SV=4	7	0.0532279		Q16363 (+1)	203 kDa	7
145	Nicotinamide phosphoribosyltransferase OS=Homo sapiens GN=NAMPT PE=1 SV=1	7	0.0532279		P43490 (+1)	56 kDa	7
146	Protein Z-dependent protease inhibitor OS=Homo sapiens GN=SERPINA10 PE=3 SV=1	7	0.0532279		G3V2W1 (+1)	55 kDa	5
147	Ribonuclease 4 OS=Homo sapiens GN=RNASE4 PE=1 SV=3	7	0.0532279		P34096	17 kDa	6
148	Soluble scavenger receptor cysteine-rich domain-containing protein SSC5D OS=Homo sapiens GN=SSC5D PE=2 SV=3	7	0.0532279		A1L4H1	166 kDa	4
149	Angiotensinogen OS=Homo sapiens GN=AGT PE=1 SV=1	6	0.0456239		P01019	53 kDa	5
150	Apolipoprotein L1 OS=Homo sapiens GN=APOL1 PE=2 SV=1	6	0.0456239		G8JL88 (+3)	31 kDa	4
151	C-X-C motif chemokine 5 OS=Homo sapiens GN=CXCL5 PE=1 SV=1	6	0.0456239		P42830	12 kDa	5
152	Cathepsin G OS=Homo sapiens GN=CTSG PE=1 SV=2	6	0.0456239		P08311	29 kDa	4
153	Coagulation factor IX OS=Homo sapiens GN=F9 PE=1 SV=2	6	0.0456239		P00740 (+1)	52 kDa	5
154	Filaggrin-2 OS=Homo sapiens GN=FLG2 PE=1 SV=1	6	0.0456239		Q5D862	248 kDa	3
155	Neutrophil gelatinase-associated lipocalin OS=Homo sapiens GN=LCN2 PE=1 SV=1	6	0.0456239		H9KV70 (+2)	23 kDa	4
156	Peptidyl-prolyl cis-trans isomerase A OS=Homo sapiens GN=PPIA PE=1 SV=2	6	0.0456239		P62937	18 kDa	6
157	Peroxiredoxin-2 OS=Homo sapiens GN=PRDX2 PE=1 SV=5	6	0.0456239		P32119	22 kDa	5
158	Plasma serine protease inhibitor OS=Homo sapiens GN=SERPINA5 PE=1 SV=3	6	0.0456239		P05154	46 kDa	5
159	Protein APOC4-APOC2 OS=Homo sapiens GN=APOC4-APOC2 PE=4 SV=1	6	0.0456239		K7ER74 (+1)	20 kDa	4
160	Protein ARPC4-TTLL3 OS=Homo sapiens GN=ARPC4-TTLL3 PE=2 SV=1	6	0.0456239		F8WCF6	21 kDa	4
161	Regenerating islet-derived protein 3-alpha OS=Homo sapiens GN=REG3A PE=1 SV=1	6	0.0456239		Q06141	19 kDa	4
162	Truncated apolipoprotein C-I (Fragment) OS=Homo sapiens GN=APOC1 PE=2 SV=1	6	0.0456239		K7ERI9 (+1)	9 kDa	6
163	Actin-related protein 2 OS=Homo sapiens GN=ACTR2 PE=1 SV=1	5	0.0380199		P61160	45 kDa	5
164	Fibrocystin OS=Homo sapiens GN=PKHD1 PE=1 SV=1	5	0.0380199		P08F94 (+1)	447 kDa	2
165	Ig heavy chain V-III region VH26 OS=Homo sapiens PE=1 SV=1	5	0.0380199		P01764	13 kDa	4
166	Ig kappa chain V-I region AU OS=Homo sapiens PE=1 SV=1	5	0.0380199		P01594	12 kDa	3
167	Ig lambda chain V-III region LOI OS=Homo sapiens PE=1 SV=1	5	0.0380199		P80748	12 kDa	4
168	Plasminogen activator inhibitor 1 OS=Homo sapiens GN=SERPINE1 PE=1 SV=1	5	0.0380199		P05121 (+1)	45 kDa	5
169	Platelet basic protein OS=Homo sapiens GN=PPBP PE=1 SV=3	5	0.0380199		P02775	14 kDa	3
170	Protein Shroom3 OS=Homo sapiens GN=SHROOM3 PE=1 SV=2	5	0.0380199		Q8TF72	217 kDa	2
171	Retinol-binding protein 4 OS=Homo sapiens GN=RBP4 PE=1 SV=3	5	0.0380199		P02753 (+1)	23 kDa	5
172	Ribonuclease pancreatic OS=Homo sapiens GN=RNASE1 PE=1 SV=4	5	0.0380199		P07998	18 kDa	2
173	Versican core protein OS=Homo sapiens GN=VCAN PE=1 SV=3	5	0.0380199		P13611 (+1)	373 kDa	5
174	78 kDa glucose-regulated protein OS=Homo sapiens GN=HSPA5 PE=1 SV=2	4	0.0304159		P11021	72 kDa	2
175	Adenylyl cyclase-associated protein 1 OS=Homo sapiens GN=CAP1 PE=1 SV=5	4	0.0304159		Q01518 (+7)	52 kDa	2
176	Antileukoproteinase OS=Homo sapiens GN=SLPI PE=1 SV=2	4	0.0304159		P03973	14 kDa	3
177	C-C motif chemokine 18 OS=Homo sapiens GN=CCL18 PE=1 SV=1	4	0.0304159		P55774	10 kDa	3
178	Cathelicidin antimicrobial peptide OS=Homo sapiens GN=CAMP PE=4 SV=1	4	0.0304159		J3KNB4 (+1)	20 kDa	4
179	Histone H2B OS=Homo sapiens GN=HIST2H2BF PE=1 SV=1	4	0.0304159		B4DR52 (+11)	18 kDa	3
180	Ig heavy chain V-II region NEWM OS=Homo sapiens PE=1 SV=1	4	0.0304159		P01825	13 kDa	2
181	Ig heavy chain V-III region NIE OS=Homo sapiens PE=1 SV=1	4	0.0304159		P01770	13 kDa	2
182	Ig kappa chain V-I region HK102 (Fragment) OS=Homo sapiens GN=IGKV1-5 PE=4 SV=1	4	0.0304159		P01602	13 kDa	4
183	Ig kappa chain V-II region RPMI 6410 OS=Homo sapiens PE=4 SV=1	4	0.0304159		P06310	15 kDa	2
184	Ig kappa chain V-II region TEW OS=Homo sapiens PE=1 SV=1	4	0.0304159		P01617	12 kDa	3
185	Ig kappa chain V-III region CLL OS=Homo sapiens PE=1 SV=2	4	0.0304159		P04207	14 kDa	3
186	Ig kappa chain V-IV region (Fragment) OS=Homo sapiens GN=IGKV4-1 PE=4 SV=1	4	0.0304159		P06312 (+1)	13 kDa	4
187	Insulin-like growth factor-binding protein 2 OS=Homo sapiens GN=IGFBP2 PE=2 SV=1	4	0.0304159		C9JMY1 (+1)	20 kDa	3
188	Kinesin-like protein KIF26B OS=Homo sapiens GN=KIF26B PE=1 SV=1	4	0.0304159		Q2KJY2-DECOY	?	3
189	Laminin subunit beta-1 OS=Homo sapiens GN=LAMB1 PE=1 SV=1	4	0.0304159		G3XAI2 (+1)	200 kDa	4
190	Laminin subunit gamma-1 OS=Homo sapiens GN=LAMC1 PE=1 SV=3	4	0.0304159		P11047	178 kDa	4
191	Nucleoside diphosphate kinase B OS=Homo sapiens GN=NME2 PE=1 SV=1	4	0.0304159		J3KPD9 (+3)	22 kDa	3
192	Peptidyl-prolyl cis-trans isomerase B OS=Homo sapiens GN=PPIB PE=1 SV=2	4	0.0304159		P23284	24 kDa	4
193	Profilin-1 OS=Homo sapiens GN=PFN1 PE=1 SV=2	4	0.0304159		P07737	15 kDa	4
194	Protein disulfide-isomerase OS=Homo sapiens GN=PDIA3 PE=1 SV=1	4	0.0304159		G5EA52 (+1)	55 kDa	3
195	Protein S100-A6 OS=Homo sapiens GN=S100A6 PE=1 SV=1	4	0.0304159		P06703	10 kDa	4
196	72 kDa type IV collagenase OS=Homo sapiens GN=MMP2 PE=1 SV=2	3	0.022812		P08253 (+2)	74 kDa	3
197	Actin-related protein 2/3 complex subunit 2 OS=Homo sapiens GN=ARPC2 PE=1 SV=1	3	0.022812		O15144	34 kDa	3
198	Actin-related protein 3 OS=Homo sapiens GN=ACTR3 PE=1 SV=1	3	0.022812		B4DXW1 (+2)	42 kDa	3
199	Alpha-1B-glycoprotein OS=Homo sapiens GN=A1BG PE=1 SV=4	3	0.022812		P04217	54 kDa	3
200	Apolipoprotein C-III OS=Homo sapiens GN=APOC3 PE=1 SV=1	3	0.022812		B0YIW2 (+1)	13 kDa	2
201	C-C motif chemokine 14 OS=Homo sapiens GN=CCL14 PE=1 SV=1	3	0.022812		Q16627	11 kDa	3
202	Elongation factor 2 OS=Homo sapiens GN=EEF2 PE=1 SV=4	3	0.022812		P13639	95 kDa	3
203	Fibulin-1 OS=Homo sapiens GN=FBLN1 PE=2 SV=1	3	0.022812		F8W7M9 (+2)	77 kDa	3
204	Flavin reductase (NADPH) OS=Homo sapiens GN=BLVRB PE=1 SV=3	3	0.022812		P30043	22 kDa	3
205	Fructose-bisphosphate aldolase A (Fragment) OS=Homo sapiens GN=ALDOA PE=1 SV=1	3	0.022812		H3BPS8 (+5)	30 kDa	3
206	Histone H4 OS=Homo sapiens GN=HIST1H4A PE=1 SV=2	3	0.022812		P62805	11 kDa	2
207	Ig heavy chain V-III region CAM OS=Homo sapiens PE=1 SV=1	3	0.022812		P01768	14 kDa	2
208	Ig heavy chain V-III region GAL OS=Homo sapiens PE=1 SV=1	3	0.022812		P01781	13 kDa	2
209	Ig lambda chain V-IV region Hil OS=Homo sapiens PE=1 SV=1	3	0.022812		P01717	12 kDa	2
210	Immunoglobulin J chain (Fragment) OS=Homo sapiens GN=IGJ PE=1 SV=2	3	0.022812		D6RD17 (+2)	18 kDa	3
211	Insulin-like growth factor I OS=Homo sapiens GN=IGF1 PE=1 SV=1	3	0.022812		P05019 (+4)	22 kDa	2
212	Insulin-like growth factor II OS=Homo sapiens GN=IGF2 PE=1 SV=1	3	0.022812		P01344 (+2)	20 kDa	2
213	Insulin-like growth factor-binding protein 3 OS=Homo sapiens GN=IGFBP3 PE=1 SV=2	3	0.022812		P17936 (+1)	32 kDa	3
214	Mimecan OS=Homo sapiens GN=OGN PE=1 SV=1	3	0.022812		P20774	34 kDa	3
215	Phospholipase A2, membrane associated OS=Homo sapiens GN=PLA2G2A PE=1 SV=2	3	0.022812		P14555	16 kDa	2
216	Platelet factor 4 OS=Homo sapiens GN=PF4 PE=1 SV=2	3	0.022812		P02776 (+1)	11 kDa	2
217	Protein S100-A12 OS=Homo sapiens GN=S100A12 PE=1 SV=2	3	0.022812		P80511	11 kDa	2
218	Protein S100-P OS=Homo sapiens GN=S100P PE=1 SV=2	3	0.022812		P25815	10 kDa	2
219	Resistin OS=Homo sapiens GN=RETN PE=2 SV=1	3	0.022812		Q9HD89	11 kDa	2
220	Retinoic acid receptor responder protein 2 OS=Homo sapiens GN=RARRES2 PE=1 SV=1	3	0.022812		Q99969	19 kDa	3
221	Selenoprotein P (Fragment) OS=Homo sapiens GN=SEPP1 PE=4 SV=1	3	0.022812		D6REX5 (+1)	35 kDa	3
222	Spondin-1 OS=Homo sapiens GN=SPON1 PE=1 SV=2	3	0.022812		Q9HCB6	91 kDa	3
223	Talin-1 OS=Homo sapiens GN=TLN1 PE=1 SV=1	3	0.022812		Q5TCU6 (+1)	258 kDa	3
224	Transforming protein RhoA OS=Homo sapiens GN=RHOA PE=1 SV=1	3	0.022812		P61586	22 kDa	3
225	Zinc-alpha-2-glycoprotein OS=Homo sapiens GN=AZGP1 PE=1 SV=2	3	0.022812		P25311	34 kDa	3
226	Annexin OS=Homo sapiens GN=ANXA3 PE=1 SV=1	2	0.015208		D6RA82 (+1)	32 kDa	2
227	Apolipoprotein A-IV OS=Homo sapiens GN=APOA4 PE=1 SV=3	2	0.015208		P06727	45 kDa	2
228	Bone marrow proteoglycan OS=Homo sapiens GN=PRG2 PE=2 SV=1	2	0.015208		A6XMW0 (+1)	24 kDa	2
229	Calsyntenin-1 OS=Homo sapiens GN=CLSTN1 PE=2 SV=1	2	0.015208		B4E3Q1 (+2)	108 kDa	2
230	Coagulation factor V OS=Homo sapiens GN=F5 PE=1 SV=4	2	0.015208		P12259	252 kDa	2
231	Corticoliberin OS=Homo sapiens GN=CRH PE=1 SV=1	2	0.015208		P06850	21 kDa	2
232	Cystatin-A OS=Homo sapiens GN=CSTA PE=1 SV=1	2	0.015208		P01040	11 kDa	2
233	EF-hand domain-containing protein D2 (Fragment) OS=Homo sapiens GN=EFHD2 PE=1 SV=1	2	0.015208		H0Y4Y4 (+1)	20 kDa	2
234	Fatty acid-binding protein, epidermal OS=Homo sapiens GN=FABP5 PE=1 SV=3	2	0.015208		Q01469	15 kDa	2
235	Fibrillin-1 OS=Homo sapiens GN=FBN1 PE=1 SV=3	2	0.015208		P35555	312 kDa	2
236	Glutathione peroxidase 3 OS=Homo sapiens GN=GPX3 PE=1 SV=2	2	0.015208		P22352	26 kDa	2
237	Hemicentin-1 OS=Homo sapiens GN=HMCN1 PE=1 SV=2	2	0.015208		Q96RW7 (+1)	613 kDa	2
238	Ig heavy chain V-I region V35 OS=Homo sapiens PE=1 SV=1	2	0.015208		P23083	13 kDa	2
239	Ig lambda chain V-I region NIG-64 OS=Homo sapiens PE=1 SV=1	2	0.015208		P01702 (+1)	11 kDa	2
240	Insulin-like growth factor-binding protein 4 OS=Homo sapiens GN=IGFBP4 PE=1 SV=2	2	0.015208		P22692	28 kDa	2
241	Myosin-9 OS=Homo sapiens GN=MYH9 PE=1 SV=4	2	0.015208		P35579 (+1)	227 kDa	2
242	Plastin-2 OS=Homo sapiens GN=LCP1 PE=1 SV=6	2	0.015208		P13796	70 kDa	2
243	Protein S100-A11 OS=Homo sapiens GN=S100A11 PE=1 SV=2	2	0.015208		P31949	12 kDa	2
244	Regulator of G-protein signaling 3 OS=Homo sapiens GN=RGS3 PE=1 SV=2	2	0.015208		P49796 (+1)	132 kDa	2
245	Transaldolase OS=Homo sapiens GN=TALDO1 PE=1 SV=1	2	0.015208		F2Z393	35 kDa	2
246	Transketolase OS=Homo sapiens GN=TKT PE=1 SV=1	2	0.015208		B4E022 (+2)	63 kDa	2
247	Unconventional myosin-Vc OS=Homo sapiens GN=MYO5C PE=1 SV=2	2	0.015208		Q9NQX4	203 kDa	2
		13151	100

## Sheet: L1400 MSCM
Number	Identified Proteins (853->213)	L1400 MSCM	Relative abundance (%)	Sum	Accession Number	Molecular Weight	Gel_06 Peptide Count
1	Apolipoprotein B-100 OS=Homo sapiens GN=APOB PE=1 SV=2	1211	12.3761		P04114	516 kDa	209
2	Complement C3 OS=Homo sapiens GN=C3 PE=1 SV=2	847	8.65611	9785	P01024	187 kDa	99
3	Serum albumin OS=Homo sapiens GN=ALB PE=1 SV=2	654	6.6837		P02768	69 kDa	73
4	Complement C4-A OS=Homo sapiens GN=C4A PE=1 SV=2	450	4.59888		P0C0L4	193 kDa	75
5	Alpha-2-macroglobulin OS=Homo sapiens GN=A2M PE=1 SV=3	323	3.30097		P01023	163 kDa	47
6	Apolipoprotein A-I OS=Homo sapiens GN=APOA1 PE=1 SV=1	318	3.24987		P02647	31 kDa	37
7	Apolipoprotein E OS=Homo sapiens GN=APOE PE=1 SV=1	262	2.67757		P02649	36 kDa	30
8	Antithrombin-III OS=Homo sapiens GN=SERPINC1 PE=1 SV=1	243	2.48339		P01008	53 kDa	30
9	Histidine-rich glycoprotein OS=Homo sapiens GN=HRG PE=1 SV=1	210	2.14614		P04196	60 kDa	43
10	Plasminogen OS=Homo sapiens GN=PLG PE=1 SV=2	180	1.83955		P00747	91 kDa	42
11	Complement factor H OS=Homo sapiens GN=CFH PE=1 SV=4	172	1.75779		P08603	139 kDa	42
12	Isoform 3 of Plasma protease C1 inhibitor OS=Homo sapiens GN=SERPING1	166	1.69647		P05155-3	56 kDa	23
13	Plasma kallikrein (Fragment) OS=Homo sapiens GN=KLKB1 PE=1 SV=1	134	1.36944		H0YAC1	77 kDa	30
14	Coagulation factor V OS=Homo sapiens GN=F5 PE=1 SV=1	132	1.349		A0A0A0MRJ7 (+1)	252 kDa	34
15	Alpha-1-antitrypsin OS=Homo sapiens GN=SERPINA1 PE=1 SV=3	129	1.31834		P01009	47 kDa	22
16	Kininogen-1 OS=Homo sapiens GN=KNG1 PE=1 SV=2	129	1.31834		P01042	72 kDa	33
17	Inter-alpha-trypsin inhibitor heavy chain H2 OS=Homo sapiens GN=ITIH2 PE=1 SV=1	125	1.27747		Q5T985	105 kDa	23
18	C4b-binding protein alpha chain OS=Homo sapiens GN=C4BPA PE=1 SV=2	121	1.23659		P04003	67 kDa	25
19	Isoform LMW of Kininogen-1 OS=Homo sapiens GN=KNG1	121	1.23659		P01042-2	48 kDa	2
20	Gelsolin OS=Homo sapiens GN=GSN PE=1 SV=1	120	1.22637		P06396	86 kDa	29
21	Vitronectin OS=Homo sapiens GN=VTN PE=1 SV=1	120	1.22637		P04004	54 kDa	32
22	Prothrombin OS=Homo sapiens GN=F2 PE=1 SV=2	112	1.14461		P00734	70 kDa	26
23	Apolipoprotein A-IV OS=Homo sapiens GN=APOA4 PE=1 SV=3	105	1.07307		P06727	45 kDa	25
24	Uncharacterized protein OS=Homo sapiens PE=1 SV=1	96	0.981094		B4E1Z4	141 kDa	21
25	Ig mu chain C region OS=Homo sapiens GN=IGHM PE=1 SV=1	94	0.960654		A0A087X2C0	64 kDa	14
26	Complement C1s subcomponent OS=Homo sapiens GN=C1S PE=1 SV=1	92	0.940215		P09871	77 kDa	16
27	Ig gamma-3 chain C region OS=Homo sapiens GN=IGHG3 PE=1 SV=1	80	0.817578		A0A087WXL8	57 kDa	8
28	Hornerin OS=Homo sapiens GN=HRNR PE=1 SV=2	79	0.807358		Q86YZ3	282 kDa	17
29	Complement C1q subcomponent subunit C OS=Homo sapiens GN=C1QC PE=1 SV=3	73	0.74604		P02747	26 kDa	7
30	Coagulation factor XII OS=Homo sapiens GN=F12 PE=1 SV=3	70	0.715381		P00748	68 kDa	17
31	Inter-alpha-trypsin inhibitor heavy chain H1 OS=Homo sapiens GN=ITIH1 PE=1 SV=3	70	0.715381		P19827	101 kDa	14
32	Complement C1q subcomponent subunit B OS=Homo sapiens GN=C1QB PE=1 SV=1	62	0.633623		D6R934 (+1)	26 kDa	9
33	Ig gamma-1 chain C region OS=Homo sapiens GN=IGHG1 PE=1 SV=1	62	0.633623		A0A087WYE1	52 kDa	14
34	Ig gamma-1 chain C region OS=Homo sapiens GN=IGHG1 PE=1 SV=1	62	0.633623		A0A087WYC5	52 kDa	3
35	Complement C5 OS=Homo sapiens GN=C5 PE=1 SV=4	61	0.623403		P01031	188 kDa	26
36	Apolipoprotein L1 OS=Homo sapiens GN=APOL1 PE=1 SV=5	58	0.592744		O14791	44 kDa	19
37	Isoform 4 of Clusterin OS=Homo sapiens GN=CLU	57	0.582524		P10909-4	49 kDa	16
38	Vitamin K-dependent protein S OS=Homo sapiens GN=PROS1 PE=1 SV=1	57	0.582524		P07225	75 kDa	17
39	Carboxypeptidase B2 OS=Homo sapiens GN=CPB2 PE=1 SV=2	55	0.562085		Q96IY4	48 kDa	12
40	Coagulation factor XI OS=Homo sapiens GN=F11 PE=1 SV=1	54	0.551865		P03951	70 kDa	20
41	Complement C1r subcomponent OS=Homo sapiens GN=C1R PE=1 SV=1	50	0.510986		B4DPQ0	82 kDa	17
42	Ig kappa chain C region OS=Homo sapiens GN=IGKC PE=1 SV=1	50	0.510986		A0A087WYL9	26 kDa	2
43	Inter-alpha-trypsin inhibitor heavy chain H4 OS=Homo sapiens GN=ITIH4 PE=1 SV=4	50	0.510986		Q14624	103 kDa	14
44	Protein IGKV3-11 OS=Homo sapiens GN=IGKV3-11 PE=4 SV=1	49	0.500766		A0A087WZW8	26 kDa	9
45	Serotransferrin OS=Homo sapiens GN=TF PE=1 SV=3	49	0.500766		P02787	77 kDa	17
46	Fibronectin OS=Homo sapiens GN=FN1 PE=1 SV=4	47	0.480327		P02751	263 kDa	26
47	Protein SAA2-SAA4 OS=Homo sapiens GN=SAA2-SAA4 PE=4 SV=1	42	0.429228		A0A096LPE2	23 kDa	10
48	Coagulation factor X OS=Homo sapiens GN=F10 PE=1 SV=2	41	0.419009		P00742	55 kDa	11
49	Heparin cofactor 2 OS=Homo sapiens GN=SERPIND1 PE=1 SV=3	40	0.408789		P05546	57 kDa	13
50	Pregnancy zone protein OS=Homo sapiens GN=PZP PE=1 SV=4	40	0.408789		P20742	164 kDa	3
51	Selenoprotein P OS=Homo sapiens GN=SEPP1 PE=1 SV=3	40	0.408789		P49908	43 kDa	8
52	Alpha-2-antiplasmin OS=Homo sapiens GN=SERPINF2 PE=1 SV=3	39	0.398569		P08697	55 kDa	12
53	Hyaluronan-binding protein 2 OS=Homo sapiens GN=HABP2 PE=1 SV=1	39	0.398569		Q14520	63 kDa	12
54	Complement component C9 OS=Homo sapiens GN=C9 PE=1 SV=2	38	0.38835		P02748	63 kDa	13
55	Sulfhydryl oxidase 1 OS=Homo sapiens GN=QSOX1 PE=1 SV=3	37	0.37813		O00391	83 kDa	16
56	Apolipoprotein C-I (Fragment) OS=Homo sapiens GN=APOC1 PE=1 SV=1	36	0.36791		K7ERI9	9 kDa	11
57	Haptoglobin OS=Homo sapiens GN=HP PE=1 SV=4	36	0.36791		H0Y300	49 kDa	15
58	Complement component C8 alpha chain OS=Homo sapiens GN=C8A PE=1 SV=2	35	0.35769		P07357	65 kDa	13
59	Complement component C8 beta chain OS=Homo sapiens GN=C8B PE=1 SV=3	34	0.347471		P07358	67 kDa	16
60	Complement factor H-related protein 1 OS=Homo sapiens GN=CFHR1 PE=1 SV=2	34	0.347471		Q03591	38 kDa	6
61	Properdin OS=Homo sapiens GN=CFP PE=1 SV=2	33	0.337251		P27918	51 kDa	10
62	Ceruloplasmin OS=Homo sapiens GN=CP PE=1 SV=1	32	0.327031		P00450	122 kDa	13
63	Insulin-like growth factor-binding protein complex acid labile subunit OS=Homo sapiens GN=IGFALS PE=1 SV=1	32	0.327031		P35858	66 kDa	10
64	Haptoglobin-related protein OS=Homo sapiens GN=HPR PE=2 SV=2	30	0.306592		P00739	39 kDa	3
65	Immunoglobulin lambda-like polypeptide 5 OS=Homo sapiens GN=IGLL5 PE=1 SV=1	30	0.306592		A0A087WWT5	25 kDa	9
66	Apolipoprotein A-II OS=Homo sapiens GN=APOA2 PE=1 SV=1	28	0.286152		P02652	11 kDa	6
67	Apolipoprotein(a) OS=Homo sapiens GN=LPA PE=1 SV=1	28	0.286152		P08519	501 kDa	18
68	Complement factor H-related protein 5 OS=Homo sapiens GN=CFHR5 PE=1 SV=1	26	0.265713		Q9BXR6	64 kDa	6
69	Coagulation factor IX OS=Homo sapiens GN=F9 PE=1 SV=2	25	0.255493		P00740	52 kDa	9
70	Ig lambda-2 chain C regions (Fragment) OS=Homo sapiens GN=IGLC2 PE=4 SV=1	25	0.255493		A0A075B6K9	11 kDa	3
71	Ig gamma-2 chain C region OS=Homo sapiens GN=IGHG2 PE=1 SV=2	24	0.245273		P01859	36 kDa	2
72	Carboxypeptidase N catalytic chain OS=Homo sapiens GN=CPN1 PE=1 SV=1	22	0.224834		P15169	52 kDa	9
73	Ig alpha-1 chain C region OS=Homo sapiens GN=IGHA1 PE=1 SV=2	22	0.224834		P01876	38 kDa	5
74	78 kDa glucose-regulated protein OS=Homo sapiens GN=HSPA5 PE=1 SV=2	21	0.214614		P11021	72 kDa	10
75	Insulin-like growth factor-binding protein 3 OS=Homo sapiens GN=IGFBP3 PE=1 SV=2	19	0.194175		P17936 (+1)	32 kDa	8
76	Complement component C6 OS=Homo sapiens GN=C6 PE=1 SV=3	17	0.173735		P13671	105 kDa	11
77	Complement component C7 OS=Homo sapiens GN=C7 PE=1 SV=2	17	0.173735		P10643	94 kDa	11
78	Transthyretin OS=Homo sapiens GN=TTR PE=1 SV=1	17	0.173735		P02766	16 kDa	5
79	Vitamin D-binding protein OS=Homo sapiens GN=GC PE=1 SV=1	17	0.173735		D6RF35	53 kDa	2
80	Fibrinogen alpha chain OS=Homo sapiens GN=FGA PE=1 SV=2	16	0.163516		P02671	95 kDa	9
81	Lipopolysaccharide-binding protein OS=Homo sapiens GN=LBP PE=1 SV=3	16	0.163516		P18428	53 kDa	5
82	Plasma serine protease inhibitor OS=Homo sapiens GN=SERPINA5 PE=1 SV=3	16	0.163516		P05154	46 kDa	6
83	Alpha-2-HS-glycoprotein OS=Homo sapiens GN=AHSG PE=1 SV=1	15	0.153296		P02765	39 kDa	7
84	C4b-binding protein beta chain OS=Homo sapiens GN=C4BPB PE=1 SV=1	15	0.153296		P20851	28 kDa	6
85	Desmoplakin OS=Homo sapiens GN=DSP PE=1 SV=3	15	0.153296		P15924	332 kDa	11
86	Isoform 2 of Vitamin K-dependent protein C OS=Homo sapiens GN=PROC	15	0.153296		P04070-2	58 kDa	6
87	Trypsin-1 OS=Homo sapiens GN=PRSS1 PE=1 SV=1	15	0.153296		P07477	27 kDa	3
88	Alpha-1-antichymotrypsin OS=Homo sapiens GN=SERPINA3 PE=1 SV=2	14	0.143076		P01011	48 kDa	6
89	Apolipoprotein C-IV OS=Homo sapiens GN=APOC4 PE=1 SV=1	14	0.143076		P55056	15 kDa	4
90	Cathelicidin antimicrobial peptide OS=Homo sapiens GN=CAMP PE=1 SV=1	14	0.143076		J3KNB4	20 kDa	8
91	Fibrinogen beta chain OS=Homo sapiens GN=FGB PE=1 SV=2	14	0.143076		P02675	56 kDa	7
92	Hepatocyte growth factor activator OS=Homo sapiens GN=HGFAC PE=1 SV=1	14	0.143076		D6RAR4 (+1)	71 kDa	4
93	Ig kappa chain V-III region HAH OS=Homo sapiens PE=2 SV=1	14	0.143076		P18135	14 kDa	4
94	Protein Z-dependent protease inhibitor OS=Homo sapiens GN=SERPINA10 PE=1 SV=1	14	0.143076		G3V2W1	55 kDa	4
95	Apolipoprotein A-V OS=Homo sapiens GN=APOA5 PE=1 SV=1	13	0.132856		Q6Q788	41 kDa	9
96	Beta-2-glycoprotein 1 OS=Homo sapiens GN=APOH PE=1 SV=3	13	0.132856		P02749	38 kDa	4
97	CD5 antigen-like OS=Homo sapiens GN=CD5L PE=1 SV=1	13	0.132856		O43866	38 kDa	6
98	Complement C1q subcomponent subunit A OS=Homo sapiens GN=C1QA PE=1 SV=2	13	0.132856		P02745	26 kDa	5
99	Isoform 2 of Dermcidin OS=Homo sapiens GN=DCD	13	0.132856		P81605-2	12 kDa	3
100	Lactotransferrin OS=Homo sapiens GN=LTF PE=1 SV=1	13	0.132856		E7ER44	78 kDa	11
101	Protein APOC4-APOC2 OS=Homo sapiens GN=APOC4-APOC2 PE=4 SV=1	13	0.132856		K7ER74	20 kDa	2
102	Vitamin D-binding protein OS=Homo sapiens GN=GC PE=1 SV=1	13	0.132856		P02774 (+1)	53 kDa	9
103	Apolipoprotein C-III OS=Homo sapiens GN=APOC3 PE=1 SV=1	12	0.122637		B0YIW2	13 kDa	3
104	Fibrinogen gamma chain OS=Homo sapiens GN=FGG PE=1 SV=3	12	0.122637		P02679 (+1)	52 kDa	7
105	Ig delta chain C region (Fragment) OS=Homo sapiens GN=IGHD PE=1 SV=1	12	0.122637		A0A0A0MS09	48 kDa	5
106	Apolipoprotein D (Fragment) OS=Homo sapiens GN=APOD PE=1 SV=1	11	0.112417		C9JF17 (+1)	24 kDa	7
107	Isoform 2 of Filamin-A OS=Homo sapiens GN=FLNA	11	0.112417		P21333-2 (+1)	280 kDa	8
108	Mannan-binding lectin serine protease 1 OS=Homo sapiens GN=MASP1 PE=1 SV=3	11	0.112417		P48740	79 kDa	3
109	Procollagen C-endopeptidase enhancer 1 OS=Homo sapiens GN=PCOLCE PE=1 SV=2	11	0.112417		Q15113	48 kDa	6
110	Protein AMBP OS=Homo sapiens GN=AMBP PE=1 SV=1	11	0.112417		P02760	39 kDa	5
111	Tetranectin OS=Homo sapiens GN=CLEC3B PE=1 SV=1	11	0.112417		E9PHK0	18 kDa	4
112	Thrombospondin-1 OS=Homo sapiens GN=THBS1 PE=1 SV=2	11	0.112417		P07996	129 kDa	9
113	Desmoglein-1 OS=Homo sapiens GN=DSG1 PE=1 SV=2	10	0.102197		Q02413	114 kDa	4
114	Filaggrin-2 OS=Homo sapiens GN=FLG2 PE=1 SV=1	10	0.102197		Q5D862	248 kDa	4
115	Kallistatin OS=Homo sapiens GN=SERPINA4 PE=1 SV=3	10	0.102197		P29622	49 kDa	5
116	Phosphatidylinositol-glycan-specific phospholipase D OS=Homo sapiens GN=GPLD1 PE=1 SV=3	10	0.102197		P80108	92 kDa	6
117	Apolipoprotein M OS=Homo sapiens GN=APOM PE=1 SV=2	9	0.0919775		O95445	21 kDa	5
118	Caspase-14 OS=Homo sapiens GN=CASP14 PE=1 SV=2	9	0.0919775		P31944	28 kDa	5
119	Complement component C8 gamma chain OS=Homo sapiens GN=C8G PE=1 SV=3	9	0.0919775		P07360	22 kDa	4
120	Complement factor D OS=Homo sapiens GN=CFD PE=1 SV=5	9	0.0919775		P00746	27 kDa	5
121	Endoplasmin OS=Homo sapiens GN=HSP90B1 PE=1 SV=1	9	0.0919775		P14625	92 kDa	6
122	Hemoglobin subunit beta OS=Homo sapiens GN=HBB PE=1 SV=2	9	0.0919775		P68871	16 kDa	5
123	Isoform C of Fibulin-1 OS=Homo sapiens GN=FBLN1	9	0.0919775		P23142-4	74 kDa	2
124	Isoform F of Proteoglycan 4 OS=Homo sapiens GN=PRG4	9	0.0919775		Q92954-6	146 kDa	8
125	Protein IGHV5-51 (Fragment) OS=Homo sapiens GN=IGHV5-51 PE=1 SV=1	9	0.0919775		A0A0C4DH38	13 kDa	3
126	Secreted phosphoprotein 24 OS=Homo sapiens GN=SPP2 PE=1 SV=1	9	0.0919775		Q13103	24 kDa	6
127	Serum paraoxonase/arylesterase 1 OS=Homo sapiens GN=PON1 PE=1 SV=3	9	0.0919775		P27169	40 kDa	6
128	Complement factor H-related protein 3 OS=Homo sapiens GN=CFHR3 PE=1 SV=2	8	0.0817578		Q02985	37 kDa	4
129	IgGFc-binding protein OS=Homo sapiens GN=FCGBP PE=1 SV=3	8	0.0817578		Q9Y6R7	572 kDa	8
130	Isoform 3 of Cartilage acidic protein 1 OS=Homo sapiens GN=CRTAC1	8	0.0817578		Q9NQ79-3	68 kDa	7
131	Pyruvate kinase PKM OS=Homo sapiens GN=PKM PE=1 SV=4	8	0.0817578		P14618	58 kDa	4
132	Actin, cytoplasmic 1 OS=Homo sapiens GN=ACTB PE=1 SV=1	7	0.0715381		P60709 (+1)	42 kDa	2
133	Angiogenin OS=Homo sapiens GN=ANG PE=1 SV=1	7	0.0715381		P03950	17 kDa	5
134	Ig kappa chain V-II region TEW OS=Homo sapiens PE=1 SV=1	7	0.0715381		P01617	12 kDa	2
135	Keratinocyte proline-rich protein OS=Homo sapiens GN=KPRP PE=1 SV=1	7	0.0715381		Q5T749	64 kDa	3
136	Moesin OS=Homo sapiens GN=MSN PE=1 SV=3	7	0.0715381		P26038	68 kDa	5
137	Proprotein convertase subtilisin/kexin type 9 OS=Homo sapiens GN=PCSK9 PE=1 SV=3	7	0.0715381		Q8NBP7	74 kDa	4
138	Protein IGHV3-74 (Fragment) OS=Homo sapiens GN=IGHV3-74 PE=1 SV=1	7	0.0715381		A0A0B4J1X5	13 kDa	2
139	Protein IGLV3-21 (Fragment) OS=Homo sapiens GN=IGLV3-21 PE=1 SV=1	7	0.0715381		A0A075B6J7	12 kDa	2
140	Protein IGLV3-25 (Fragment) OS=Homo sapiens GN=IGLV3-25 PE=1 SV=2	7	0.0715381		A0A075B6J4	12 kDa	2
141	Alpha-1-acid glycoprotein 1 OS=Homo sapiens GN=ORM1 PE=1 SV=1	6	0.0613183		P02763	24 kDa	2
142	Fibulin-1 OS=Homo sapiens GN=FBLN1 PE=1 SV=4	6	0.0613183		P23142	77 kDa	3
143	Ficolin-3 OS=Homo sapiens GN=FCN3 PE=1 SV=2	6	0.0613183		O75636	33 kDa	5
144	Fructose-bisphosphate aldolase OS=Homo sapiens GN=ALDOA PE=1 SV=1	6	0.0613183		J3KPS3 (+2)	40 kDa	6
145	Ig kappa chain V-I region DEE OS=Homo sapiens PE=1 SV=1	6	0.0613183		P01597	12 kDa	2
146	Insulin-like growth factor-binding protein 2 OS=Homo sapiens GN=IGFBP2 PE=1 SV=2	6	0.0613183		P18065	35 kDa	5
147	Inter-alpha-trypsin inhibitor heavy chain H3 OS=Homo sapiens GN=ITIH3 PE=1 SV=2	6	0.0613183		Q06033 (+1)	100 kDa	3
148	Isoform 2 of N-acetylmuramoyl-L-alanine amidase OS=Homo sapiens GN=PGLYRP2	6	0.0613183		Q96PD5-2	68 kDa	3
149	Mannosyl-oligosaccharide 1,2-alpha-mannosidase IA OS=Homo sapiens GN=MAN1A1 PE=1 SV=3	6	0.0613183		P33908	73 kDa	6
150	Retinoic acid receptor responder protein 2 OS=Homo sapiens GN=RARRES2 PE=1 SV=1	6	0.0613183		Q99969	19 kDa	2
151	Angiopoietin-related protein 3 OS=Homo sapiens GN=ANGPTL3 PE=1 SV=1	5	0.0510986		Q9Y5C1	54 kDa	4
152	Fatty acid-binding protein, epidermal OS=Homo sapiens GN=FABP5 PE=1 SV=3	5	0.0510986		Q01469	15 kDa	2
153	Hemoglobin subunit alpha OS=Homo sapiens GN=HBA1 PE=1 SV=2	5	0.0510986		P69905	15 kDa	2
154	Phospholipid transfer protein OS=Homo sapiens GN=PLTP PE=1 SV=1	5	0.0510986		P55058	55 kDa	3
155	Ribonuclease 4 OS=Homo sapiens GN=RNASE4 PE=1 SV=3	5	0.0510986		P34096	17 kDa	3
156	Serum amyloid P-component OS=Homo sapiens GN=APCS PE=1 SV=2	5	0.0510986		P02743	25 kDa	4
157	Transforming growth factor-beta-induced protein ig-h3 OS=Homo sapiens GN=TGFBI PE=1 SV=1	5	0.0510986		Q15582	75 kDa	3
158	Actin, alpha cardiac muscle 1 OS=Homo sapiens GN=ACTC1 PE=1 SV=1	4	0.0408789		P68032	42 kDa	4
159	Adipocyte plasma membrane-associated protein OS=Homo sapiens GN=APMAP PE=1 SV=2	4	0.0408789		Q9HDC9	46 kDa	4
160	Beta-Ala-His dipeptidase OS=Homo sapiens GN=CNDP1 PE=1 SV=4	4	0.0408789		Q96KN2	57 kDa	4
161	Calsyntenin-1 OS=Homo sapiens GN=CLSTN1 PE=1 SV=1	4	0.0408789		O94985 (+1)	110 kDa	4
162	Carboxypeptidase N subunit 2 OS=Homo sapiens GN=CPN2 PE=1 SV=3	4	0.0408789		P22792	61 kDa	3
163	Complement factor I OS=Homo sapiens GN=CFI PE=1 SV=1	4	0.0408789		E7ETH0	67 kDa	2
164	Filaggrin OS=Homo sapiens GN=FLG PE=1 SV=3	4	0.0408789		P20930	435 kDa	3
165	Heat shock 70 kDa protein 1A OS=Homo sapiens GN=HSPA1A PE=1 SV=1	4	0.0408789		P0DMV8 (+1)	70 kDa	2
166	Hemopexin OS=Homo sapiens GN=HPX PE=1 SV=2	4	0.0408789		P02790	52 kDa	2
167	Ig kappa chain V-III region B6 OS=Homo sapiens PE=1 SV=1	4	0.0408789		P01619	12 kDa	2
168	Insulin-like growth factor-binding protein 5 OS=Homo sapiens GN=IGFBP5 PE=1 SV=1	4	0.0408789		P24593	31 kDa	4
169	Isoform 3 of L-lactate dehydrogenase A chain OS=Homo sapiens GN=LDHA	4	0.0408789		P00338-3	40 kDa	2
170	Multiple inositol polyphosphate phosphatase 1 OS=Homo sapiens GN=MINPP1 PE=1 SV=1	4	0.0408789		Q9UNW1	55 kDa	3
171	Myosin-9 OS=Homo sapiens GN=MYH9 PE=1 SV=4	4	0.0408789		P35579	227 kDa	4
172	Protein IGHV3-15 (Fragment) OS=Homo sapiens GN=IGHV3-15 PE=1 SV=1	4	0.0408789		A0A0B4J1V0	13 kDa	2
173	Alpha-enolase OS=Homo sapiens GN=ENO1 PE=1 SV=2	3	0.0306592		P06733	47 kDa	3
174	Cadherin-1 OS=Homo sapiens GN=CDH1 PE=1 SV=1	3	0.0306592		A0A087WXI5	100 kDa	2
175	Cartilage oligomeric matrix protein OS=Homo sapiens GN=COMP PE=1 SV=1	3	0.0306592		G3XAP6 (+2)	80 kDa	2
176	Catalase OS=Homo sapiens GN=CAT PE=1 SV=3	3	0.0306592		P04040	60 kDa	2
177	C-C motif chemokine OS=Homo sapiens GN=CCL14 PE=1 SV=1	3	0.0306592		A0A087X089	13 kDa	3
178	Extracellular matrix protein 1 OS=Homo sapiens GN=ECM1 PE=1 SV=2	3	0.0306592		Q16610 (+1)	61 kDa	2
179	Hepatocyte growth factor-like protein OS=Homo sapiens GN=MST1 PE=1 SV=1	3	0.0306592		G3XAK1 (+1)	82 kDa	2
180	Isoform 3 of Collagen alpha-1(XVIII) chain OS=Homo sapiens GN=COL18A1	3	0.0306592		P39060-2	136 kDa	2
181	Neutrophil defensin 1 OS=Homo sapiens GN=DEFA1 PE=1 SV=1	3	0.0306592		P59665	10 kDa	2
182	Nicotinate phosphoribosyltransferase (Fragment) OS=Homo sapiens GN=NAPRT PE=1 SV=1	3	0.0306592		H0YDA6	14 kDa	2
183	Peptidyl-prolyl cis-trans isomerase B OS=Homo sapiens GN=PPIB PE=1 SV=2	3	0.0306592		P23284	24 kDa	3
184	Phosphoglycerate kinase 1 OS=Homo sapiens GN=PGK1 PE=1 SV=3	3	0.0306592		P00558	45 kDa	3
185	Pigment epithelium-derived factor OS=Homo sapiens GN=SERPINF1 PE=1 SV=4	3	0.0306592		P36955	46 kDa	3
186	Platelet-activating factor acetylhydrolase OS=Homo sapiens GN=PLA2G7 PE=1 SV=1	3	0.0306592		Q13093	50 kDa	3
187	Polymeric immunoglobulin receptor OS=Homo sapiens GN=PIGR PE=1 SV=4	3	0.0306592		P01833	83 kDa	3
188	Protein IGLV3-19 (Fragment) OS=Homo sapiens GN=IGLV3-19 PE=1 SV=1	3	0.0306592		A0A075B6J8	12 kDa	2
189	Retinol-binding protein 4 OS=Homo sapiens GN=RBP4 PE=1 SV=1	3	0.0306592		A0A0C4DGV7 (+2)	23 kDa	3
190	Thrombospondin-4 OS=Homo sapiens GN=THBS4 PE=1 SV=2	3	0.0306592		P35443	106 kDa	2
191	Vinculin OS=Homo sapiens GN=VCL PE=1 SV=4	3	0.0306592		P18206 (+1)	124 kDa	3
192	Afamin OS=Homo sapiens GN=AFM PE=1 SV=1	2	0.0204394		P43652	69 kDa	2
193	Alpha-1B-glycoprotein OS=Homo sapiens GN=A1BG PE=1 SV=4	2	0.0204394		P04217	54 kDa	2
194	Angiotensinogen OS=Homo sapiens GN=AGT PE=1 SV=1	2	0.0204394		P01019	53 kDa	2
195	Coagulation factor VII OS=Homo sapiens GN=F7 PE=1 SV=1	2	0.0204394		P08709 (+1)	52 kDa	2
196	Coagulation factor XIII A chain OS=Homo sapiens GN=F13A1 PE=1 SV=4	2	0.0204394		P00488	83 kDa	2
197	C-reactive protein OS=Homo sapiens GN=CRP PE=1 SV=1	2	0.0204394		P02741	25 kDa	2
198	Creatine kinase M-type OS=Homo sapiens GN=CKM PE=1 SV=2	2	0.0204394		P06732	43 kDa	2
199	Ficolin-2 OS=Homo sapiens GN=FCN2 PE=1 SV=2	2	0.0204394		Q15485	34 kDa	2
200	Flavin reductase (NADPH) OS=Homo sapiens GN=BLVRB PE=1 SV=3	2	0.0204394		P30043	22 kDa	2
201	Galectin-3-binding protein OS=Homo sapiens GN=LGALS3BP PE=1 SV=1	2	0.0204394		Q08380	65 kDa	2
202	Glutathione peroxidase OS=Homo sapiens GN=GPX3 PE=1 SV=1	2	0.0204394		A0A087X1J7 (+1)	25 kDa	2
203	GTP-binding nuclear protein Ran OS=Homo sapiens GN=RAN PE=1 SV=1	2	0.0204394		B5MDF5 (+1)	26 kDa	2
204	Isoform 2 of Anthrax toxin receptor 2 OS=Homo sapiens GN=ANTXR2	2	0.0204394		P58335-2	43 kDa	2
205	Platelet basic protein OS=Homo sapiens GN=PPBP PE=1 SV=3	2	0.0204394		P02775	14 kDa	2
206	Prenylcysteine oxidase 1 OS=Homo sapiens GN=PCYOX1 PE=1 SV=3	2	0.0204394		Q9UHG3	57 kDa	2
207	Protein disulfide-isomerase A3 OS=Homo sapiens GN=PDIA3 PE=1 SV=4	2	0.0204394		P30101	57 kDa	2
208	Protein S100-A9 OS=Homo sapiens GN=S100A9 PE=1 SV=1	2	0.0204394		P06702	13 kDa	2
209	Ras-related protein Rap-1b OS=Homo sapiens GN=RAP1B PE=1 SV=1	2	0.0204394		P61224	21 kDa	2
210	Replication factor C subunit 1 OS=Homo sapiens GN=RFC1 PE=1 SV=4	2	0.0204394		P35251 (+1)	128 kDa	2
211	Serpin A11 OS=Homo sapiens GN=SERPINA11 PE=2 SV=2	2	0.0204394		Q86U17	47 kDa	2
212	Tenascin OS=Homo sapiens GN=TNC PE=1 SV=3	2	0.0204394		P24821	241 kDa	2
213	Vitamin K-dependent protein Z OS=Homo sapiens GN=PROZ PE=1 SV=2	2	0.0204394		P22891 (+1)	45 kDa	2
		9785	100
