# Supplementary material for: Methods of protein corona isolation for magnetic nanoparticles
Source: Royal Society of Chemistry journal article supplement (doi:10.1039/c7an00646b), 2017-01-01
Supplement: c7an00646b5.xlsx [file c7an00646b5.xlsx]

## Sheet: B1400
Number of total proteins	175	211
Soft PC	67	103
% Soft PC	38.2857	48.8152
Real HPC	MagSep	MSCM
	6-phosphogluconate dehydrogenase, decarboxylating OS=Homo sapiens GN=PGD PE=1 SV=1	6-phosphogluconate dehydrogenase, decarboxylating OS=Homo sapiens GN=PGD PE=1 SV=3
	72 kDa type IV collagenase OS=Homo sapiens GN=MMP2 PE=1 SV=2	78 kDa glucose-regulated protein OS=Homo sapiens GN=HSPA5 PE=1 SV=2
	78 kDa glucose-regulated protein OS=Homo sapiens GN=HSPA5 PE=1 SV=2	Actin, alpha cardiac muscle 1 OS=Homo sapiens GN=ACTC1 PE=1 SV=1
	Actin-related protein 2 OS=Homo sapiens GN=ACTR2 PE=1 SV=1	Adipocyte plasma membrane-associated protein OS=Homo sapiens GN=APMAP PE=1 SV=2
	Actin, cytoplasmic 1 OS=Homo sapiens GN=ACTB PE=1 SV=1	Afamin OS=Homo sapiens GN=AFM PE=1 SV=1
	Alpha-1-acid glycoprotein 1 OS=Homo sapiens GN=ORM1 PE=1 SV=1	Alpha-1-acid glycoprotein 1 OS=Homo sapiens GN=ORM1 PE=1 SV=1
	Alpha-1-antichymotrypsin OS=Homo sapiens GN=SERPINA3 PE=1 SV=2	Alpha-1-antichymotrypsin OS=Homo sapiens GN=SERPINA3 PE=1 SV=2
	Alpha-1-antitrypsin OS=Homo sapiens GN=SERPINA1 PE=1 SV=3	Alpha-1-antitrypsin OS=Homo sapiens GN=SERPINA1 PE=1 SV=3
	Alpha-1B-glycoprotein (Fragment) OS=Homo sapiens GN=A1BG PE=4 SV=2	Alpha-1B-glycoprotein OS=Homo sapiens GN=A1BG PE=1 SV=4
	Alpha-2-antiplasmin OS=Homo sapiens GN=SERPINF2 PE=1 SV=3	Alpha-2-antiplasmin OS=Homo sapiens GN=SERPINF2 PE=1 SV=3
	Alpha-2-HS-glycoprotein OS=Homo sapiens GN=AHSG PE=1 SV=1	Alpha-2-HS-glycoprotein OS=Homo sapiens GN=AHSG PE=1 SV=1
	Alpha-2-macroglobulin OS=Homo sapiens GN=A2M PE=1 SV=3	Alpha-2-macroglobulin OS=Homo sapiens GN=A2M PE=1 SV=3
	Alpha-enolase OS=Homo sapiens GN=ENO1 PE=1 SV=2	Alpha-enolase OS=Homo sapiens GN=ENO1 PE=1 SV=2
	Angiotensinogen OS=Homo sapiens GN=AGT PE=1 SV=1	Angiogenin OS=Homo sapiens GN=ANG PE=1 SV=1
	Annexin A1 OS=Homo sapiens GN=ANXA1 PE=1 SV=2	Angiopoietin-related protein 3 OS=Homo sapiens GN=ANGPTL3 PE=1 SV=1
	Annexin A2 OS=Homo sapiens GN=ANXA2 PE=1 SV=2	Antithrombin-III OS=Homo sapiens GN=SERPINC1 PE=1 SV=1
	Antithrombin-III OS=Homo sapiens GN=SERPINC1 PE=1 SV=1	Apolipoprotein A-I OS=Homo sapiens GN=APOA1 PE=1 SV=1
	Apolipoprotein A-I OS=Homo sapiens GN=APOA1 PE=1 SV=1	Apolipoprotein A-II OS=Homo sapiens GN=APOA2 PE=1 SV=1
	Apolipoprotein A-II OS=Homo sapiens GN=APOA2 PE=1 SV=1	Apolipoprotein A-IV OS=Homo sapiens GN=APOA4 PE=1 SV=3
	Apolipoprotein A-IV OS=Homo sapiens GN=APOA4 PE=1 SV=3	Apolipoprotein A-V OS=Homo sapiens GN=APOA5 PE=1 SV=1
	Apolipoprotein B-100 OS=Homo sapiens GN=APOB PE=1 SV=2	Apolipoprotein B-100 OS=Homo sapiens GN=APOB PE=1 SV=2
	Apolipoprotein C-IV OS=Homo sapiens GN=APOC4 PE=1 SV=1	Apolipoprotein C-I (Fragment) OS=Homo sapiens GN=APOC1 PE=1 SV=1
	Apolipoprotein D (Fragment) OS=Homo sapiens GN=APOD PE=2 SV=1	Apolipoprotein C-IV OS=Homo sapiens GN=APOC4 PE=1 SV=1
	Apolipoprotein E OS=Homo sapiens GN=APOE PE=1 SV=1	Apolipoprotein D (Fragment) OS=Homo sapiens GN=APOD PE=1 SV=1
	Apolipoprotein L1 OS=Homo sapiens GN=APOL1 PE=2 SV=1	Apolipoprotein E OS=Homo sapiens GN=APOE PE=1 SV=1
	Apolipoprotein(a) OS=Homo sapiens GN=LPA PE=1 SV=1	Apolipoprotein L1 OS=Homo sapiens GN=APOL1 PE=1 SV=5
	Azurocidin OS=Homo sapiens GN=AZU1 PE=1 SV=3	Apolipoprotein M OS=Homo sapiens GN=APOM PE=1 SV=2
	Beta-2-glycoprotein 1 OS=Homo sapiens GN=APOH PE=1 SV=3	Apolipoprotein(a) OS=Homo sapiens GN=LPA PE=1 SV=1
	C-reactive protein OS=Homo sapiens GN=CRP PE=1 SV=1	Beta-2-glycoprotein 1 OS=Homo sapiens GN=APOH PE=1 SV=3
	C4b-binding protein alpha chain OS=Homo sapiens GN=C4BPA PE=1 SV=2	Beta-Ala-His dipeptidase OS=Homo sapiens GN=CNDP1 PE=1 SV=4
	Carboxypeptidase B2 OS=Homo sapiens GN=CPB2 PE=1 SV=2	C-reactive protein OS=Homo sapiens GN=CRP PE=1 SV=1
	Carboxypeptidase N catalytic chain OS=Homo sapiens GN=CPN1 PE=1 SV=1	C4b-binding protein alpha chain OS=Homo sapiens GN=C4BPA PE=1 SV=2
	Cartilage intermediate layer protein 1 OS=Homo sapiens GN=CILP PE=1 SV=4	C4b-binding protein beta chain OS=Homo sapiens GN=C4BPB PE=1 SV=1
	Cathepsin B OS=Homo sapiens GN=CTSB PE=1 SV=3	Cadherin-1 OS=Homo sapiens GN=CDH1 PE=1 SV=1
	Cathepsin G OS=Homo sapiens GN=CTSG PE=1 SV=2	Calsyntenin-1 OS=Homo sapiens GN=CLSTN1 PE=1 SV=1
	CD5 antigen-like OS=Homo sapiens GN=CD5L PE=1 SV=1	Carboxypeptidase B2 OS=Homo sapiens GN=CPB2 PE=1 SV=2
	Ceruloplasmin OS=Homo sapiens GN=CP PE=1 SV=1	Carboxypeptidase N catalytic chain OS=Homo sapiens GN=CPN1 PE=1 SV=1
	Chitinase-3-like protein 1 OS=Homo sapiens GN=CHI3L1 PE=1 SV=2	Carboxypeptidase N subunit 2 OS=Homo sapiens GN=CPN2 PE=1 SV=3
	Clusterin OS=Homo sapiens GN=CLU PE=1 SV=1	Cartilage oligomeric matrix protein OS=Homo sapiens GN=COMP PE=1 SV=1
	Coagulation factor IX OS=Homo sapiens GN=F9 PE=1 SV=2	Caspase-14 OS=Homo sapiens GN=CASP14 PE=1 SV=2
	Coagulation factor XI OS=Homo sapiens GN=F11 PE=1 SV=1	Catalase OS=Homo sapiens GN=CAT PE=1 SV=3
	Coagulation factor XII OS=Homo sapiens GN=F12 PE=1 SV=3	Cathelicidin antimicrobial peptide OS=Homo sapiens GN=CAMP PE=1 SV=1
	Collagen alpha-1(I) chain OS=Homo sapiens GN=COL1A1 PE=1 SV=5	Cathepsin S OS=Homo sapiens GN=CTSS PE=1 SV=3
	Collagen alpha-1(III) chain OS=Homo sapiens GN=COL3A1 PE=2 SV=1	CD5 antigen-like OS=Homo sapiens GN=CD5L PE=1 SV=1
	Collagen alpha-1(V) chain OS=Homo sapiens GN=COL5A1 PE=1 SV=3	Ceruloplasmin OS=Homo sapiens GN=CP PE=1 SV=1
	Collagen alpha-1(XII) chain OS=Homo sapiens GN=COL12A1 PE=1 SV=1	Cholesteryl ester transfer protein OS=Homo sapiens GN=CETP PE=1 SV=2
	Collagen alpha-2(I) chain OS=Homo sapiens GN=COL1A2 PE=1 SV=7	Coagulation factor IX OS=Homo sapiens GN=F9 PE=1 SV=2
	Collagen alpha-3(VI) chain OS=Homo sapiens GN=COL6A3 PE=1 SV=1	Coagulation factor V OS=Homo sapiens GN=F5 PE=1 SV=1
	Complement C1q subcomponent subunit A OS=Homo sapiens GN=C1QA PE=1 SV=2	Coagulation factor VII OS=Homo sapiens GN=F7 PE=1 SV=1
	Complement C1q subcomponent subunit B OS=Homo sapiens GN=C1QB PE=2 SV=1	Coagulation factor X OS=Homo sapiens GN=F10 PE=1 SV=2
	Complement C1q subcomponent subunit C OS=Homo sapiens GN=C1QC PE=1 SV=3	Coagulation factor XI OS=Homo sapiens GN=F11 PE=1 SV=1
	Complement C1r subcomponent OS=Homo sapiens GN=C1R PE=1 SV=2	Coagulation factor XII OS=Homo sapiens GN=F12 PE=1 SV=3
	Complement C1s subcomponent OS=Homo sapiens GN=C1S PE=1 SV=1	Coagulation factor XIII A chain OS=Homo sapiens GN=F13A1 PE=1 SV=4
	Complement C3 OS=Homo sapiens GN=C3 PE=1 SV=2	Complement C1q subcomponent subunit A OS=Homo sapiens GN=C1QA PE=1 SV=2
	Complement C4-A OS=Homo sapiens GN=C4A PE=1 SV=2	Complement C1q subcomponent subunit B OS=Homo sapiens GN=C1QB PE=1 SV=1
	Complement C4-B OS=Homo sapiens GN=C4B PE=1 SV=2	Complement C1q subcomponent subunit C OS=Homo sapiens GN=C1QC PE=1 SV=3
	Complement C5 OS=Homo sapiens GN=C5 PE=1 SV=4	Complement C1r subcomponent OS=Homo sapiens GN=C1R PE=1 SV=1
	Complement component C6 OS=Homo sapiens GN=C6 PE=1 SV=3	Complement C1s subcomponent OS=Homo sapiens GN=C1S PE=1 SV=1
	Complement component C7 OS=Homo sapiens GN=C7 PE=1 SV=2	Complement C3 OS=Homo sapiens GN=C3 PE=1 SV=2
	Complement component C8 alpha chain OS=Homo sapiens GN=C8A PE=1 SV=2	Complement C4-A OS=Homo sapiens GN=C4A PE=1 SV=2
	Complement component C8 beta chain OS=Homo sapiens GN=C8B PE=1 SV=3	Complement C4-B OS=Homo sapiens GN=C4B PE=1 SV=2
	Complement component C8 gamma chain OS=Homo sapiens GN=C8G PE=1 SV=3	Complement C5 OS=Homo sapiens GN=C5 PE=1 SV=4
	Complement component C9 OS=Homo sapiens GN=C9 PE=1 SV=2	Complement component C6 OS=Homo sapiens GN=C6 PE=1 SV=3
	Complement factor B OS=Homo sapiens GN=CFB PE=2 SV=1	Complement component C7 OS=Homo sapiens GN=C7 PE=1 SV=2
	Complement factor D OS=Homo sapiens GN=CFD PE=2 SV=1	Complement component C8 alpha chain OS=Homo sapiens GN=C8A PE=1 SV=2
	Complement factor H OS=Homo sapiens GN=CFH PE=1 SV=4	Complement component C8 beta chain OS=Homo sapiens GN=C8B PE=1 SV=3
	Complement factor H-related protein 1 OS=Homo sapiens GN=CFHR1 PE=1 SV=2	Complement component C8 gamma chain OS=Homo sapiens GN=C8G PE=1 SV=3
	Complement factor H-related protein 2 OS=Homo sapiens GN=CFHR2 PE=1 SV=1	Complement component C9 OS=Homo sapiens GN=C9 PE=1 SV=2
	Complement factor H-related protein 3 OS=Homo sapiens GN=CFHR3 PE=1 SV=2	Complement factor D OS=Homo sapiens GN=CFD PE=1 SV=5
	Complement factor H-related protein 5 OS=Homo sapiens GN=CFHR5 PE=2 SV=1	Complement factor H OS=Homo sapiens GN=CFH PE=1 SV=4
	Complement factor I light chain OS=Homo sapiens GN=CFI PE=2 SV=1	Complement factor H-related protein 1 OS=Homo sapiens GN=CFHR1 PE=1 SV=2
	Dermcidin OS=Homo sapiens GN=DCD PE=1 SV=2	Complement factor H-related protein 3 OS=Homo sapiens GN=CFHR3 PE=1 SV=2
	EF-hand calcium-binding domain-containing protein 3 OS=Homo sapiens GN=EFCAB3 PE=2 SV=1	Complement factor H-related protein 5 OS=Homo sapiens GN=CFHR5 PE=1 SV=1
	EGF-containing fibulin-like extracellular matrix protein 1 OS=Homo sapiens GN=EFEMP1 PE=1 SV=2	Complement factor I OS=Homo sapiens GN=CFI PE=1 SV=1
	Elongation factor 1-alpha 1 OS=Homo sapiens GN=EEF1A1 PE=1 SV=1	Corticosteroid-binding globulin OS=Homo sapiens GN=SERPINA6 PE=1 SV=1
	F-actin-capping protein subunit beta OS=Homo sapiens GN=CAPZB PE=1 SV=1	Creatine kinase M-type OS=Homo sapiens GN=CKM PE=1 SV=2
	Fibrinogen alpha chain OS=Homo sapiens GN=FGA PE=1 SV=2	Desmoglein-1 OS=Homo sapiens GN=DSG1 PE=1 SV=2
	Fibrinogen beta chain OS=Homo sapiens GN=FGB PE=1 SV=2	Desmoplakin OS=Homo sapiens GN=DSP PE=1 SV=3
	Fibrinogen gamma chain OS=Homo sapiens GN=FGG PE=1 SV=3	Endoplasmin OS=Homo sapiens GN=HSP90B1 PE=1 SV=1
	Fibronectin OS=Homo sapiens GN=FN1 PE=1 SV=4	Extracellular matrix protein 1 OS=Homo sapiens GN=ECM1 PE=1 SV=2
	Fibulin-1 OS=Homo sapiens GN=FBLN1 PE=2 SV=1	Extracellular superoxide dismutase [Cu-Zn] OS=Homo sapiens GN=SOD3 PE=1 SV=2
	Fructose-bisphosphate aldolase A OS=Homo sapiens GN=ALDOA PE=1 SV=2	Fibrinogen alpha chain OS=Homo sapiens GN=FGA PE=1 SV=2
	Gelsolin OS=Homo sapiens GN=GSN PE=1 SV=1	Fibrinogen beta chain OS=Homo sapiens GN=FGB PE=1 SV=2
	Glyceraldehyde-3-phosphate dehydrogenase OS=Homo sapiens GN=GAPDH PE=1 SV=3	Fibrinogen gamma chain OS=Homo sapiens GN=FGG PE=1 SV=3
	Haptoglobin OS=Homo sapiens GN=HP PE=1 SV=1	Fibronectin OS=Homo sapiens GN=FN1 PE=1 SV=4
	Haptoglobin-related protein OS=Homo sapiens GN=HPR PE=1 SV=2	Fibulin-1 OS=Homo sapiens GN=FBLN1 PE=1 SV=4
	Heat shock cognate 71 kDa protein OS=Homo sapiens GN=HSPA8 PE=1 SV=1	Ficolin-1 OS=Homo sapiens GN=FCN1 PE=1 SV=2
	Hemoglobin subunit beta OS=Homo sapiens GN=HBB PE=1 SV=2	Ficolin-3 OS=Homo sapiens GN=FCN3 PE=1 SV=2
	Hemopexin OS=Homo sapiens GN=HPX PE=1 SV=2	Filaggrin-2 OS=Homo sapiens GN=FLG2 PE=1 SV=1
	Heparin cofactor 2 OS=Homo sapiens GN=SERPIND1 PE=1 SV=3	Flavin reductase (NADPH) OS=Homo sapiens GN=BLVRB PE=1 SV=3
	Hepatocyte growth factor activator OS=Homo sapiens GN=HGFAC PE=2 SV=1	Fructose-bisphosphate aldolase B OS=Homo sapiens GN=ALDOB PE=1 SV=2
	Histidine-rich glycoprotein OS=Homo sapiens GN=HRG PE=1 SV=1	Fructose-bisphosphate aldolase OS=Homo sapiens GN=ALDOA PE=1 SV=1
	Hornerin OS=Homo sapiens GN=HRNR PE=1 SV=2	Galectin-3-binding protein OS=Homo sapiens GN=LGALS3BP PE=1 SV=1
	Hyaluronan-binding protein 2 OS=Homo sapiens GN=HABP2 PE=1 SV=1	Gelsolin OS=Homo sapiens GN=GSN PE=1 SV=1
	Ig alpha-1 chain C region OS=Homo sapiens GN=IGHA1 PE=1 SV=2	Haptoglobin OS=Homo sapiens GN=HP PE=1 SV=4
	Ig gamma-1 chain C region OS=Homo sapiens GN=IGHG1 PE=1 SV=1	Haptoglobin-related protein OS=Homo sapiens GN=HPR PE=2 SV=2
	Ig gamma-2 chain C region OS=Homo sapiens GN=IGHG2 PE=1 SV=2	Heat shock 70 kDa protein 1A OS=Homo sapiens GN=HSPA1A PE=1 SV=1
	Ig gamma-3 chain C region OS=Homo sapiens GN=IGHG3 PE=1 SV=2	Heat shock cognate 71 kDa protein OS=Homo sapiens GN=HSPA8 PE=1 SV=1
	Ig heavy chain V-I region HG3 OS=Homo sapiens PE=4 SV=1	Hemoglobin subunit alpha OS=Homo sapiens GN=HBA1 PE=1 SV=2
	Ig heavy chain V-II region NEWM OS=Homo sapiens PE=1 SV=1	Hemoglobin subunit beta OS=Homo sapiens GN=HBB PE=1 SV=2
	Ig heavy chain V-III region BRO OS=Homo sapiens PE=1 SV=1	Heparin cofactor 2 OS=Homo sapiens GN=SERPIND1 PE=1 SV=3
	Ig heavy chain V-III region NIE OS=Homo sapiens PE=1 SV=1	Hepatocyte growth factor activator OS=Homo sapiens GN=HGFAC PE=1 SV=1
	Ig heavy chain V-III region VH26 OS=Homo sapiens PE=1 SV=1	Histidine-rich glycoprotein OS=Homo sapiens GN=HRG PE=1 SV=1
	Ig kappa chain C region OS=Homo sapiens GN=IGKC PE=1 SV=1	Hornerin OS=Homo sapiens GN=HRNR PE=1 SV=2
	Ig kappa chain V-I region AG OS=Homo sapiens PE=1 SV=1	Hyaluronan-binding protein 2 OS=Homo sapiens GN=HABP2 PE=1 SV=1
	Ig kappa chain V-II region TEW OS=Homo sapiens PE=1 SV=1	Ig alpha-1 chain C region OS=Homo sapiens GN=IGHA1 PE=1 SV=2
	Ig kappa chain V-III region B6 OS=Homo sapiens PE=1 SV=1	Ig delta chain C region (Fragment) OS=Homo sapiens GN=IGHD PE=1 SV=1
	Ig kappa chain V-III region CLL OS=Homo sapiens PE=1 SV=2	Ig gamma-1 chain C region OS=Homo sapiens GN=IGHG1 PE=1 SV=1
	Ig kappa chain V-III region HAH OS=Homo sapiens PE=2 SV=1	Ig gamma-1 chain C region OS=Homo sapiens GN=IGHG1 PE=1 SV=1
	Ig kappa chain V-III region VG (Fragment) OS=Homo sapiens PE=1 SV=1	Ig gamma-3 chain C region OS=Homo sapiens GN=IGHG3 PE=1 SV=1
	Ig kappa chain V-IV region Len OS=Homo sapiens PE=1 SV=2	Ig kappa chain C region OS=Homo sapiens GN=IGKC PE=1 SV=1
	Ig lambda chain V-I region WAH OS=Homo sapiens PE=1 SV=1	Ig kappa chain V-I region DEE OS=Homo sapiens PE=1 SV=1
	Ig lambda chain V-III region LOI OS=Homo sapiens PE=1 SV=1	Ig kappa chain V-II region TEW OS=Homo sapiens PE=1 SV=1
	Ig lambda-2 chain C regions OS=Homo sapiens GN=IGLC2 PE=1 SV=1	Ig kappa chain V-III region B6 OS=Homo sapiens PE=1 SV=1
	Ig mu chain C region OS=Homo sapiens GN=IGHM PE=1 SV=3	Ig kappa chain V-III region HAH OS=Homo sapiens PE=2 SV=1
	Ig mu heavy chain disease protein OS=Homo sapiens PE=1 SV=1	Ig lambda chain V-I region NEW OS=Homo sapiens PE=1 SV=1
	Immunoglobulin J chain (Fragment) OS=Homo sapiens GN=IGJ PE=1 SV=1	Ig lambda-2 chain C regions (Fragment) OS=Homo sapiens GN=IGLC2 PE=4 SV=1
	Immunoglobulin lambda-like polypeptide 5 OS=Homo sapiens GN=IGLL5 PE=2 SV=2	Ig mu chain C region OS=Homo sapiens GN=IGHM PE=1 SV=1
	Insulin-like growth factor-binding protein complex acid labile subunit OS=Homo sapiens GN=IGFALS PE=1 SV=1	IgGFc-binding protein OS=Homo sapiens GN=FCGBP PE=1 SV=3
	Inter-alpha-trypsin inhibitor heavy chain H1 OS=Homo sapiens GN=ITIH1 PE=1 SV=3	Immunoglobulin lambda-like polypeptide 5 OS=Homo sapiens GN=IGLL5 PE=1 SV=1
	Inter-alpha-trypsin inhibitor heavy chain H2 OS=Homo sapiens GN=ITIH2 PE=1 SV=2	Insulin-like growth factor-binding protein 2 OS=Homo sapiens GN=IGFBP2 PE=1 SV=2
	Inter-alpha-trypsin inhibitor heavy chain H4 OS=Homo sapiens GN=ITIH4 PE=1 SV=4	Insulin-like growth factor-binding protein 3 OS=Homo sapiens GN=IGFBP3 PE=1 SV=2
	Isoform 2 of C4b-binding protein beta chain OS=Homo sapiens GN=C4BPB	Insulin-like growth factor-binding protein 5 OS=Homo sapiens GN=IGFBP5 PE=1 SV=1
	Isoform 3 of Insulin-like growth factor II OS=Homo sapiens GN=IGF2	Insulin-like growth factor-binding protein 7 OS=Homo sapiens GN=IGFBP7 PE=1 SV=1
	Isoform F of Proteoglycan 4 OS=Homo sapiens GN=PRG4	Insulin-like growth factor-binding protein complex acid labile subunit OS=Homo sapiens GN=IGFALS PE=1 SV=1
	Isoform LMW of Kininogen-1 OS=Homo sapiens GN=KNG1	Inter-alpha-trypsin inhibitor heavy chain H1 OS=Homo sapiens GN=ITIH1 PE=1 SV=3
	Kaliocin-1 (Fragment) OS=Homo sapiens GN=LTF PE=1 SV=1	Inter-alpha-trypsin inhibitor heavy chain H2 OS=Homo sapiens GN=ITIH2 PE=1 SV=1
	Keratinocyte proline-rich protein OS=Homo sapiens GN=KPRP PE=1 SV=1	Inter-alpha-trypsin inhibitor heavy chain H3 OS=Homo sapiens GN=ITIH3 PE=1 SV=2
	Laminin subunit alpha-4 OS=Homo sapiens GN=LAMA4 PE=1 SV=4	Inter-alpha-trypsin inhibitor heavy chain H4 OS=Homo sapiens GN=ITIH4 PE=1 SV=4
	Leukocyte elastase inhibitor OS=Homo sapiens GN=SERPINB1 PE=1 SV=1	Isoform 2 of Anthrax toxin receptor 2 OS=Homo sapiens GN=ANTXR2
	Lipopolysaccharide-binding protein OS=Homo sapiens GN=LBP PE=1 SV=3	Isoform 2 of Dermcidin OS=Homo sapiens GN=DCD
	Metalloproteinase inhibitor 1 OS=Homo sapiens GN=TIMP1 PE=1 SV=1	Isoform 2 of Filamin-A OS=Homo sapiens GN=FLNA
	Moesin OS=Homo sapiens GN=MSN PE=1 SV=3	Isoform 2 of N-acetylmuramoyl-L-alanine amidase OS=Homo sapiens GN=PGLYRP2
	Myeloperoxidase OS=Homo sapiens GN=MPO PE=1 SV=1	Isoform 2 of Vitamin K-dependent protein C OS=Homo sapiens GN=PROC
	Neutrophil defensin 1 OS=Homo sapiens GN=DEFA1 PE=1 SV=1	Isoform 3 of Cartilage acidic protein 1 OS=Homo sapiens GN=CRTAC1
	Neutrophil gelatinase-associated lipocalin OS=Homo sapiens GN=LCN2 PE=1 SV=1	Isoform 3 of Collagen alpha-1(XVIII) chain OS=Homo sapiens GN=COL18A1
	Nicotinamide phosphoribosyltransferase OS=Homo sapiens GN=NAMPT PE=1 SV=1	Isoform 3 of Complement C1q tumor necrosis factor-related protein 3 OS=Homo sapiens GN=C1QTNF3
	Peroxiredoxin 2, isoform CRA_a OS=Homo sapiens GN=PRDX2 PE=1 SV=2	Isoform 3 of L-lactate dehydrogenase A chain OS=Homo sapiens GN=LDHA
	Phosphoglycerate kinase OS=Homo sapiens GN=PGK1 PE=1 SV=1	Isoform 3 of Leukotriene A-4 hydrolase OS=Homo sapiens GN=LTA4H
	Phospholipid transfer protein OS=Homo sapiens GN=PLTP PE=1 SV=1	Isoform 3 of Plasma protease C1 inhibitor OS=Homo sapiens GN=SERPING1
	Pigment epithelium-derived factor OS=Homo sapiens GN=SERPINF1 PE=1 SV=4	Isoform 4 of Clusterin OS=Homo sapiens GN=CLU
	Plasma kallikrein heavy chain (Fragment) OS=Homo sapiens GN=KLKB1 PE=3 SV=1	Isoform C of Fibulin-1 OS=Homo sapiens GN=FBLN1
	Plasma protease C1 inhibitor OS=Homo sapiens GN=SERPING1 PE=2 SV=1	Isoform F of Proteoglycan 4 OS=Homo sapiens GN=PRG4
	Plasma serine protease inhibitor OS=Homo sapiens GN=SERPINA5 PE=1 SV=3	Isoform LMW of Kininogen-1 OS=Homo sapiens GN=KNG1
	Plasminogen activator inhibitor 1 OS=Homo sapiens GN=SERPINE1 PE=1 SV=1	Junction plakoglobin OS=Homo sapiens GN=JUP PE=1 SV=3
	Plasminogen OS=Homo sapiens GN=PLG PE=1 SV=2	Kallistatin OS=Homo sapiens GN=SERPINA4 PE=1 SV=3
	Plastin-2 OS=Homo sapiens GN=LCP1 PE=1 SV=6	Keratinocyte proline-rich protein OS=Homo sapiens GN=KPRP PE=1 SV=1
	Procollagen C-endopeptidase enhancer 1 OS=Homo sapiens GN=PCOLCE PE=1 SV=2	Kininogen-1 OS=Homo sapiens GN=KNG1 PE=1 SV=2
	Properdin OS=Homo sapiens GN=CFP PE=1 SV=2	L-lactate dehydrogenase B chain OS=Homo sapiens GN=LDHB PE=1 SV=2
	Protein AMBP OS=Homo sapiens GN=AMBP PE=1 SV=1	Lactotransferrin OS=Homo sapiens GN=LTF PE=1 SV=1
	Protein APOC4-APOC2 OS=Homo sapiens GN=APOC4-APOC2 PE=4 SV=1	Lipopolysaccharide-binding protein OS=Homo sapiens GN=LBP PE=1 SV=3
	Protein disulfide-isomerase OS=Homo sapiens GN=PDIA3 PE=1 SV=1	Lysozyme C OS=Homo sapiens GN=LYZ PE=1 SV=1
	Protein S (Alpha), isoform CRA_b OS=Homo sapiens GN=PROS1 PE=4 SV=1	Mannan-binding lectin serine protease 1 OS=Homo sapiens GN=MASP1 PE=1 SV=3
	Protein Z-dependent protease inhibitor OS=Homo sapiens GN=SERPINA10 PE=3 SV=1	Mannose-binding protein C OS=Homo sapiens GN=MBL2 PE=1 SV=2
	Prothrombin OS=Homo sapiens GN=F2 PE=1 SV=2	Mannosyl-oligosaccharide 1,2-alpha-mannosidase IA OS=Homo sapiens GN=MAN1A1 PE=1 SV=3
	Pyruvate kinase OS=Homo sapiens GN=PKM PE=1 SV=1	Moesin OS=Homo sapiens GN=MSN PE=1 SV=3
	Ribonuclease pancreatic OS=Homo sapiens GN=RNASE1 PE=2 SV=1	Multimerin-2 OS=Homo sapiens GN=MMRN2 PE=1 SV=2
	Serotransferrin OS=Homo sapiens GN=TF PE=1 SV=3	Neutral alpha-glucosidase AB OS=Homo sapiens GN=GANAB PE=1 SV=3
	Serum albumin OS=Homo sapiens GN=ALB PE=1 SV=2	Nicotinate phosphoribosyltransferase (Fragment) OS=Homo sapiens GN=NAPRT PE=1 SV=1
	Serum amyloid A-4 protein OS=Homo sapiens GN=SAA4 PE=1 SV=2	Olfactomedin-like protein 3 OS=Homo sapiens GN=OLFML3 PE=2 SV=1
	Serum amyloid P-component OS=Homo sapiens GN=APCS PE=1 SV=2	Peptidyl-prolyl cis-trans isomerase B OS=Homo sapiens GN=PPIB PE=1 SV=2
	Serum paraoxonase/arylesterase 1 OS=Homo sapiens GN=PON1 PE=1 SV=3	Peroxiredoxin-1 OS=Homo sapiens GN=PRDX1 PE=1 SV=1
	Soluble scavenger receptor cysteine-rich domain-containing protein SSC5D OS=Homo sapiens GN=SSC5D PE=2 SV=3	Phosphatidylinositol-glycan-specific phospholipase D OS=Homo sapiens GN=GPLD1 PE=1 SV=3
	Spondin-1 OS=Homo sapiens GN=SPON1 PE=1 SV=2	Phosphoglycerate kinase 1 OS=Homo sapiens GN=PGK1 PE=1 SV=3
	Sulfhydryl oxidase 1 OS=Homo sapiens GN=QSOX1 PE=1 SV=3	Phospholipid transfer protein OS=Homo sapiens GN=PLTP PE=1 SV=1
	Tenascin OS=Homo sapiens GN=TNC PE=1 SV=3	Pigment epithelium-derived factor OS=Homo sapiens GN=SERPINF1 PE=1 SV=4
	Tenascin-X OS=Homo sapiens GN=TNXB PE=2 SV=1	Plasma kallikrein (Fragment) OS=Homo sapiens GN=KLKB1 PE=1 SV=1
	Tetranectin OS=Homo sapiens GN=CLEC3B PE=4 SV=1	Plasma serine protease inhibitor OS=Homo sapiens GN=SERPINA5 PE=1 SV=3
	Thrombospondin-1 OS=Homo sapiens GN=THBS1 PE=1 SV=2	Plasminogen OS=Homo sapiens GN=PLG PE=1 SV=2
	Transforming growth factor-beta-induced protein ig-h3 OS=Homo sapiens GN=TGFBI PE=2 SV=1	Platelet-activating factor acetylhydrolase OS=Homo sapiens GN=PLA2G7 PE=1 SV=1
	Transketolase OS=Homo sapiens GN=TKT PE=1 SV=1	Procollagen C-endopeptidase enhancer 1 OS=Homo sapiens GN=PCOLCE PE=1 SV=2
	Truncated apolipoprotein C-I (Fragment) OS=Homo sapiens GN=APOC1 PE=2 SV=1	Properdin OS=Homo sapiens GN=CFP PE=1 SV=2
	Vitamin D-binding protein OS=Homo sapiens GN=GC PE=1 SV=1	Proprotein convertase subtilisin/kexin type 9 OS=Homo sapiens GN=PCSK9 PE=1 SV=3
	Vitronectin OS=Homo sapiens GN=VTN PE=1 SV=1	Protein AMBP OS=Homo sapiens GN=AMBP PE=1 SV=1
	Zinc-alpha-2-glycoprotein OS=Homo sapiens GN=AZGP1 PE=1 SV=2	Protein IGHV3-74 (Fragment) OS=Homo sapiens GN=IGHV3-74 PE=1 SV=1
		Protein IGHV5-51 (Fragment) OS=Homo sapiens GN=IGHV5-51 PE=1 SV=1
		Protein IGKV3-11 OS=Homo sapiens GN=IGKV3-11 PE=4 SV=1
		Protein IGLV3-19 (Fragment) OS=Homo sapiens GN=IGLV3-19 PE=1 SV=1
		Protein IGLV3-21 (Fragment) OS=Homo sapiens GN=IGLV3-21 PE=1 SV=1
		Protein IGLV3-25 (Fragment) OS=Homo sapiens GN=IGLV3-25 PE=1 SV=2
		Protein IGLV6-57 OS=Homo sapiens GN=IGLV6-57 PE=1 SV=2
		Protein SAA2-SAA4 OS=Homo sapiens GN=SAA2-SAA4 PE=4 SV=1
		Protein TKFC OS=Homo sapiens GN=TKFC PE=1 SV=1
		Protein Z-dependent protease inhibitor OS=Homo sapiens GN=SERPINA10 PE=1 SV=1
		Prothrombin OS=Homo sapiens GN=F2 PE=1 SV=2
		Pyruvate kinase PKM OS=Homo sapiens GN=PKM PE=1 SV=4
		Retinoic acid receptor responder protein 2 OS=Homo sapiens GN=RARRES2 PE=1 SV=1
		Ribonuclease 4 OS=Homo sapiens GN=RNASE4 PE=1 SV=3
		Secreted phosphoprotein 24 OS=Homo sapiens GN=SPP2 PE=1 SV=1
		Selenoprotein P OS=Homo sapiens GN=SEPP1 PE=1 SV=3
		Serotransferrin OS=Homo sapiens GN=TF PE=1 SV=3
		Serpin A11 OS=Homo sapiens GN=SERPINA11 PE=2 SV=2
		Serum albumin OS=Homo sapiens GN=ALB PE=1 SV=2
		Serum amyloid P-component OS=Homo sapiens GN=APCS PE=1 SV=2
		Serum paraoxonase/arylesterase 1 OS=Homo sapiens GN=PON1 PE=1 SV=3
		Serum paraoxonase/lactonase 3 OS=Homo sapiens GN=PON3 PE=1 SV=3
		Sulfhydryl oxidase 1 OS=Homo sapiens GN=QSOX1 PE=1 SV=3
		Suprabasin OS=Homo sapiens GN=SBSN PE=1 SV=2
		Talin-1 OS=Homo sapiens GN=TLN1 PE=1 SV=3
		Tetranectin OS=Homo sapiens GN=CLEC3B PE=1 SV=1
		Tetratricopeptide repeat protein 25 OS=Homo sapiens GN=TTC25 PE=1 SV=1
		Thrombospondin-1 OS=Homo sapiens GN=THBS1 PE=1 SV=2
		Transcobalamin-2 OS=Homo sapiens GN=TCN2 PE=1 SV=1
		Transforming growth factor-beta-induced protein ig-h3 OS=Homo sapiens GN=TGFBI PE=1 SV=1
		Transthyretin OS=Homo sapiens GN=TTR PE=1 SV=1
		Trypsin-1 OS=Homo sapiens GN=PRSS1 PE=1 SV=1
		Uncharacterized protein OS=Homo sapiens PE=1 SV=1
		Vinculin OS=Homo sapiens GN=VCL PE=1 SV=4
		Vitamin D-binding protein OS=Homo sapiens GN=GC PE=1 SV=1
		Vitamin K-dependent protein S OS=Homo sapiens GN=PROS1 PE=1 SV=1
		Vitronectin OS=Homo sapiens GN=VTN PE=1 SV=1

## Sheet: L1400
Number of total proteins	247	213
Soft PC	122	86
% Soft PC	49.3927	40.3756
Real HPC	MagSep	MSCM
	6-phosphogluconate dehydrogenase, decarboxylating OS=Homo sapiens GN=PGD PE=1 SV=1	78 kDa glucose-regulated protein OS=Homo sapiens GN=HSPA5 PE=1 SV=2
	72 kDa type IV collagenase OS=Homo sapiens GN=MMP2 PE=1 SV=2	Actin, alpha cardiac muscle 1 OS=Homo sapiens GN=ACTC1 PE=1 SV=1
	78 kDa glucose-regulated protein OS=Homo sapiens GN=HSPA5 PE=1 SV=2	Actin, cytoplasmic 1 OS=Homo sapiens GN=ACTB PE=1 SV=1
	Actin-related protein 2 OS=Homo sapiens GN=ACTR2 PE=1 SV=1	Adipocyte plasma membrane-associated protein OS=Homo sapiens GN=APMAP PE=1 SV=2
	Actin-related protein 2/3 complex subunit 2 OS=Homo sapiens GN=ARPC2 PE=1 SV=1	Afamin OS=Homo sapiens GN=AFM PE=1 SV=1
	Actin-related protein 3 OS=Homo sapiens GN=ACTR3 PE=1 SV=1	Alpha-1-acid glycoprotein 1 OS=Homo sapiens GN=ORM1 PE=1 SV=1
	Actin, cytoplasmic 1 OS=Homo sapiens GN=ACTB PE=1 SV=1	Alpha-1-antichymotrypsin OS=Homo sapiens GN=SERPINA3 PE=1 SV=2
	Adenylyl cyclase-associated protein 1 OS=Homo sapiens GN=CAP1 PE=1 SV=5	Alpha-1-antitrypsin OS=Homo sapiens GN=SERPINA1 PE=1 SV=3
	Alpha-1-acid glycoprotein 1 OS=Homo sapiens GN=ORM1 PE=1 SV=1	Alpha-1B-glycoprotein OS=Homo sapiens GN=A1BG PE=1 SV=4
	Alpha-1-antichymotrypsin OS=Homo sapiens GN=SERPINA3 PE=1 SV=2	Alpha-2-antiplasmin OS=Homo sapiens GN=SERPINF2 PE=1 SV=3
	Alpha-1-antitrypsin OS=Homo sapiens GN=SERPINA1 PE=1 SV=3	Alpha-2-HS-glycoprotein OS=Homo sapiens GN=AHSG PE=1 SV=1
	Alpha-1B-glycoprotein OS=Homo sapiens GN=A1BG PE=1 SV=4	Alpha-2-macroglobulin OS=Homo sapiens GN=A2M PE=1 SV=3
	Alpha-2-antiplasmin OS=Homo sapiens GN=SERPINF2 PE=1 SV=3	Alpha-enolase OS=Homo sapiens GN=ENO1 PE=1 SV=2
	Alpha-2-HS-glycoprotein OS=Homo sapiens GN=AHSG PE=1 SV=1	Angiogenin OS=Homo sapiens GN=ANG PE=1 SV=1
	Alpha-2-macroglobulin OS=Homo sapiens GN=A2M PE=1 SV=3	Angiopoietin-related protein 3 OS=Homo sapiens GN=ANGPTL3 PE=1 SV=1
	Alpha-enolase OS=Homo sapiens GN=ENO1 PE=1 SV=2	Angiotensinogen OS=Homo sapiens GN=AGT PE=1 SV=1
	Angiogenin OS=Homo sapiens GN=ANG PE=1 SV=1	Antithrombin-III OS=Homo sapiens GN=SERPINC1 PE=1 SV=1
	Angiotensinogen OS=Homo sapiens GN=AGT PE=1 SV=1	Apolipoprotein A-I OS=Homo sapiens GN=APOA1 PE=1 SV=1
	Annexin A1 OS=Homo sapiens GN=ANXA1 PE=1 SV=2	Apolipoprotein A-II OS=Homo sapiens GN=APOA2 PE=1 SV=1
	Annexin A2 OS=Homo sapiens GN=ANXA2 PE=1 SV=2	Apolipoprotein A-IV OS=Homo sapiens GN=APOA4 PE=1 SV=3
	Annexin OS=Homo sapiens GN=ANXA3 PE=1 SV=1	Apolipoprotein A-V OS=Homo sapiens GN=APOA5 PE=1 SV=1
	Antileukoproteinase OS=Homo sapiens GN=SLPI PE=1 SV=2	Apolipoprotein B-100 OS=Homo sapiens GN=APOB PE=1 SV=2
	Antithrombin-III OS=Homo sapiens GN=SERPINC1 PE=1 SV=1	Apolipoprotein C-I (Fragment) OS=Homo sapiens GN=APOC1 PE=1 SV=1
	Apolipoprotein A-I OS=Homo sapiens GN=APOA1 PE=1 SV=1	Apolipoprotein C-III OS=Homo sapiens GN=APOC3 PE=1 SV=1
	Apolipoprotein A-II OS=Homo sapiens GN=APOA2 PE=1 SV=1	Apolipoprotein C-IV OS=Homo sapiens GN=APOC4 PE=1 SV=1
	Apolipoprotein A-IV OS=Homo sapiens GN=APOA4 PE=1 SV=3	Apolipoprotein D (Fragment) OS=Homo sapiens GN=APOD PE=1 SV=1
	Apolipoprotein B-100 OS=Homo sapiens GN=APOB PE=1 SV=2	Apolipoprotein E OS=Homo sapiens GN=APOE PE=1 SV=1
	Apolipoprotein C-III OS=Homo sapiens GN=APOC3 PE=1 SV=1	Apolipoprotein L1 OS=Homo sapiens GN=APOL1 PE=1 SV=5
	Apolipoprotein D (Fragment) OS=Homo sapiens GN=APOD PE=2 SV=1	Apolipoprotein M OS=Homo sapiens GN=APOM PE=1 SV=2
	Apolipoprotein E OS=Homo sapiens GN=APOE PE=1 SV=1	Apolipoprotein(a) OS=Homo sapiens GN=LPA PE=1 SV=1
	Apolipoprotein L1 OS=Homo sapiens GN=APOL1 PE=2 SV=1	Beta-2-glycoprotein 1 OS=Homo sapiens GN=APOH PE=1 SV=3
	Apolipoprotein(a) OS=Homo sapiens GN=LPA PE=1 SV=1	Beta-Ala-His dipeptidase OS=Homo sapiens GN=CNDP1 PE=1 SV=4
	Azurocidin OS=Homo sapiens GN=AZU1 PE=1 SV=3	C-C motif chemokine OS=Homo sapiens GN=CCL14 PE=1 SV=1
	Beta-2-glycoprotein 1 OS=Homo sapiens GN=APOH PE=1 SV=3	C-reactive protein OS=Homo sapiens GN=CRP PE=1 SV=1
	Bone marrow proteoglycan OS=Homo sapiens GN=PRG2 PE=2 SV=1	C4b-binding protein alpha chain OS=Homo sapiens GN=C4BPA PE=1 SV=2
	C-C motif chemokine 14 OS=Homo sapiens GN=CCL14 PE=1 SV=1	C4b-binding protein beta chain OS=Homo sapiens GN=C4BPB PE=1 SV=1
	C-C motif chemokine 18 OS=Homo sapiens GN=CCL18 PE=1 SV=1	Cadherin-1 OS=Homo sapiens GN=CDH1 PE=1 SV=1
	C-reactive protein OS=Homo sapiens GN=CRP PE=1 SV=1	Calsyntenin-1 OS=Homo sapiens GN=CLSTN1 PE=1 SV=1
	C-X-C motif chemokine 5 OS=Homo sapiens GN=CXCL5 PE=1 SV=1	Carboxypeptidase B2 OS=Homo sapiens GN=CPB2 PE=1 SV=2
	C4b-binding protein alpha chain OS=Homo sapiens GN=C4BPA PE=1 SV=2	Carboxypeptidase N catalytic chain OS=Homo sapiens GN=CPN1 PE=1 SV=1
	Calsyntenin-1 OS=Homo sapiens GN=CLSTN1 PE=2 SV=1	Carboxypeptidase N subunit 2 OS=Homo sapiens GN=CPN2 PE=1 SV=3
	Carboxypeptidase B2 OS=Homo sapiens GN=CPB2 PE=1 SV=2	Cartilage oligomeric matrix protein OS=Homo sapiens GN=COMP PE=1 SV=1
	Cartilage intermediate layer protein 1 OS=Homo sapiens GN=CILP PE=1 SV=4	Caspase-14 OS=Homo sapiens GN=CASP14 PE=1 SV=2
	Cathelicidin antimicrobial peptide OS=Homo sapiens GN=CAMP PE=4 SV=1	Catalase OS=Homo sapiens GN=CAT PE=1 SV=3
	Cathepsin B OS=Homo sapiens GN=CTSB PE=1 SV=3	Cathelicidin antimicrobial peptide OS=Homo sapiens GN=CAMP PE=1 SV=1
	Cathepsin G OS=Homo sapiens GN=CTSG PE=1 SV=2	CD5 antigen-like OS=Homo sapiens GN=CD5L PE=1 SV=1
	CD5 antigen-like OS=Homo sapiens GN=CD5L PE=1 SV=1	Ceruloplasmin OS=Homo sapiens GN=CP PE=1 SV=1
	Ceruloplasmin OS=Homo sapiens GN=CP PE=1 SV=1	Coagulation factor IX OS=Homo sapiens GN=F9 PE=1 SV=2
	Chitinase-3-like protein 1 OS=Homo sapiens GN=CHI3L1 PE=1 SV=2	Coagulation factor V OS=Homo sapiens GN=F5 PE=1 SV=1
	Clusterin OS=Homo sapiens GN=CLU PE=1 SV=1	Coagulation factor VII OS=Homo sapiens GN=F7 PE=1 SV=1
	Coagulation factor IX OS=Homo sapiens GN=F9 PE=1 SV=2	Coagulation factor X OS=Homo sapiens GN=F10 PE=1 SV=2
	Coagulation factor V OS=Homo sapiens GN=F5 PE=1 SV=4	Coagulation factor XI OS=Homo sapiens GN=F11 PE=1 SV=1
	Coagulation factor XI OS=Homo sapiens GN=F11 PE=1 SV=1	Coagulation factor XII OS=Homo sapiens GN=F12 PE=1 SV=3
	Coagulation factor XII OS=Homo sapiens GN=F12 PE=1 SV=3	Coagulation factor XIII A chain OS=Homo sapiens GN=F13A1 PE=1 SV=4
	Cofilin-1 OS=Homo sapiens GN=CFL1 PE=1 SV=3	Complement C1q subcomponent subunit A OS=Homo sapiens GN=C1QA PE=1 SV=2
	Collagen alpha-1(I) chain OS=Homo sapiens GN=COL1A1 PE=1 SV=5	Complement C1q subcomponent subunit B OS=Homo sapiens GN=C1QB PE=1 SV=1
	Collagen alpha-1(III) chain OS=Homo sapiens GN=COL3A1 PE=2 SV=1	Complement C1q subcomponent subunit C OS=Homo sapiens GN=C1QC PE=1 SV=3
	Collagen alpha-1(V) chain OS=Homo sapiens GN=COL5A1 PE=1 SV=3	Complement C1r subcomponent OS=Homo sapiens GN=C1R PE=1 SV=1
	Collagen alpha-1(XII) chain OS=Homo sapiens GN=COL12A1 PE=1 SV=1	Complement C1s subcomponent OS=Homo sapiens GN=C1S PE=1 SV=1
	Collagen alpha-2(I) chain OS=Homo sapiens GN=COL1A2 PE=1 SV=7	Complement C3 OS=Homo sapiens GN=C3 PE=1 SV=2
	Complement C1q subcomponent subunit A OS=Homo sapiens GN=C1QA PE=1 SV=2	Complement C4-A OS=Homo sapiens GN=C4A PE=1 SV=2
	Complement C1q subcomponent subunit B OS=Homo sapiens GN=C1QB PE=2 SV=1	Complement C5 OS=Homo sapiens GN=C5 PE=1 SV=4
	Complement C1q subcomponent subunit C OS=Homo sapiens GN=C1QC PE=1 SV=3	Complement component C6 OS=Homo sapiens GN=C6 PE=1 SV=3
	Complement C1r subcomponent OS=Homo sapiens GN=C1R PE=1 SV=2	Complement component C7 OS=Homo sapiens GN=C7 PE=1 SV=2
	Complement C1s subcomponent OS=Homo sapiens GN=C1S PE=1 SV=1	Complement component C8 alpha chain OS=Homo sapiens GN=C8A PE=1 SV=2
	Complement C3 OS=Homo sapiens GN=C3 PE=1 SV=2	Complement component C8 beta chain OS=Homo sapiens GN=C8B PE=1 SV=3
	Complement C4-A OS=Homo sapiens GN=C4A PE=1 SV=2	Complement component C8 gamma chain OS=Homo sapiens GN=C8G PE=1 SV=3
	Complement C4-B OS=Homo sapiens GN=C4B PE=1 SV=2	Complement component C9 OS=Homo sapiens GN=C9 PE=1 SV=2
	Complement C5 OS=Homo sapiens GN=C5 PE=1 SV=4	Complement factor D OS=Homo sapiens GN=CFD PE=1 SV=5
	Complement component C6 OS=Homo sapiens GN=C6 PE=1 SV=3	Complement factor H OS=Homo sapiens GN=CFH PE=1 SV=4
	Complement component C7 OS=Homo sapiens GN=C7 PE=1 SV=2	Complement factor H-related protein 1 OS=Homo sapiens GN=CFHR1 PE=1 SV=2
	Complement component C8 alpha chain OS=Homo sapiens GN=C8A PE=1 SV=2	Complement factor H-related protein 3 OS=Homo sapiens GN=CFHR3 PE=1 SV=2
	Complement component C8 beta chain OS=Homo sapiens GN=C8B PE=2 SV=1	Complement factor H-related protein 5 OS=Homo sapiens GN=CFHR5 PE=1 SV=1
	Complement component C8 gamma chain OS=Homo sapiens GN=C8G PE=1 SV=3	Complement factor I OS=Homo sapiens GN=CFI PE=1 SV=1
	Complement component C9 OS=Homo sapiens GN=C9 PE=1 SV=2	Creatine kinase M-type OS=Homo sapiens GN=CKM PE=1 SV=2
	Complement factor B OS=Homo sapiens GN=CFB PE=2 SV=1	Desmoglein-1 OS=Homo sapiens GN=DSG1 PE=1 SV=2
	Complement factor D OS=Homo sapiens GN=CFD PE=2 SV=1	Desmoplakin OS=Homo sapiens GN=DSP PE=1 SV=3
	Complement factor H OS=Homo sapiens GN=CFH PE=1 SV=4	Endoplasmin OS=Homo sapiens GN=HSP90B1 PE=1 SV=1
	Complement factor H OS=Homo sapiens GN=CFH PE=2 SV=1	Extracellular matrix protein 1 OS=Homo sapiens GN=ECM1 PE=1 SV=2
	Complement factor H-related protein 1 OS=Homo sapiens GN=CFHR1 PE=1 SV=2	Fatty acid-binding protein, epidermal OS=Homo sapiens GN=FABP5 PE=1 SV=3
	Complement factor H-related protein 2 OS=Homo sapiens GN=CFHR2 PE=1 SV=1	Fibrinogen alpha chain OS=Homo sapiens GN=FGA PE=1 SV=2
	Complement factor H-related protein 3 OS=Homo sapiens GN=CFHR3 PE=1 SV=2	Fibrinogen beta chain OS=Homo sapiens GN=FGB PE=1 SV=2
	Complement factor H-related protein 5 OS=Homo sapiens GN=CFHR5 PE=2 SV=1	Fibrinogen gamma chain OS=Homo sapiens GN=FGG PE=1 SV=3
	Complement factor I light chain OS=Homo sapiens GN=CFI PE=2 SV=1	Fibronectin OS=Homo sapiens GN=FN1 PE=1 SV=4
	Corticoliberin OS=Homo sapiens GN=CRH PE=1 SV=1	Fibulin-1 OS=Homo sapiens GN=FBLN1 PE=1 SV=4
	Cystatin-A OS=Homo sapiens GN=CSTA PE=1 SV=1	Ficolin-2 OS=Homo sapiens GN=FCN2 PE=1 SV=2
	Cystatin-C OS=Homo sapiens GN=CST3 PE=1 SV=1	Ficolin-3 OS=Homo sapiens GN=FCN3 PE=1 SV=2
	Dermcidin OS=Homo sapiens GN=DCD PE=1 SV=2	Filaggrin OS=Homo sapiens GN=FLG PE=1 SV=3
	EF-hand domain-containing protein D2 (Fragment) OS=Homo sapiens GN=EFHD2 PE=1 SV=1	Filaggrin-2 OS=Homo sapiens GN=FLG2 PE=1 SV=1
	Elongation factor 2 OS=Homo sapiens GN=EEF2 PE=1 SV=4	Flavin reductase (NADPH) OS=Homo sapiens GN=BLVRB PE=1 SV=3
	Eosinophil cationic protein OS=Homo sapiens GN=RNASE3 PE=1 SV=2	Fructose-bisphosphate aldolase OS=Homo sapiens GN=ALDOA PE=1 SV=1
	Fatty acid-binding protein, epidermal OS=Homo sapiens GN=FABP5 PE=1 SV=3	Galectin-3-binding protein OS=Homo sapiens GN=LGALS3BP PE=1 SV=1
	Fibrillin-1 OS=Homo sapiens GN=FBN1 PE=1 SV=3	Gelsolin OS=Homo sapiens GN=GSN PE=1 SV=1
	Fibrinogen alpha chain OS=Homo sapiens GN=FGA PE=1 SV=2	Glutathione peroxidase OS=Homo sapiens GN=GPX3 PE=1 SV=1
	Fibrinogen beta chain OS=Homo sapiens GN=FGB PE=1 SV=2	GTP-binding nuclear protein Ran OS=Homo sapiens GN=RAN PE=1 SV=1
	Fibrinogen gamma chain OS=Homo sapiens GN=FGG PE=1 SV=3	Haptoglobin OS=Homo sapiens GN=HP PE=1 SV=4
	Fibrocystin OS=Homo sapiens GN=PKHD1 PE=1 SV=1	Haptoglobin-related protein OS=Homo sapiens GN=HPR PE=2 SV=2
	Fibronectin OS=Homo sapiens GN=FN1 PE=1 SV=4	Heat shock 70 kDa protein 1A OS=Homo sapiens GN=HSPA1A PE=1 SV=1
	Fibulin-1 OS=Homo sapiens GN=FBLN1 PE=2 SV=1	Hemoglobin subunit alpha OS=Homo sapiens GN=HBA1 PE=1 SV=2
	Filaggrin-2 OS=Homo sapiens GN=FLG2 PE=1 SV=1	Hemoglobin subunit beta OS=Homo sapiens GN=HBB PE=1 SV=2
	Flavin reductase (NADPH) OS=Homo sapiens GN=BLVRB PE=1 SV=3	Hemopexin OS=Homo sapiens GN=HPX PE=1 SV=2
	Fructose-bisphosphate aldolase A (Fragment) OS=Homo sapiens GN=ALDOA PE=1 SV=1	Heparin cofactor 2 OS=Homo sapiens GN=SERPIND1 PE=1 SV=3
	Gelsolin OS=Homo sapiens GN=GSN PE=1 SV=1	Hepatocyte growth factor activator OS=Homo sapiens GN=HGFAC PE=1 SV=1
	Glutathione peroxidase 3 OS=Homo sapiens GN=GPX3 PE=1 SV=2	Hepatocyte growth factor-like protein OS=Homo sapiens GN=MST1 PE=1 SV=1
	Glyceraldehyde-3-phosphate dehydrogenase OS=Homo sapiens GN=GAPDH PE=1 SV=3	Histidine-rich glycoprotein OS=Homo sapiens GN=HRG PE=1 SV=1
	Haptoglobin OS=Homo sapiens GN=HP PE=1 SV=1	Hornerin OS=Homo sapiens GN=HRNR PE=1 SV=2
	Heat shock 70 kDa protein 1A/1B OS=Homo sapiens GN=HSPA1A PE=1 SV=5	Hyaluronan-binding protein 2 OS=Homo sapiens GN=HABP2 PE=1 SV=1
	Hemicentin-1 OS=Homo sapiens GN=HMCN1 PE=1 SV=2	Ig alpha-1 chain C region OS=Homo sapiens GN=IGHA1 PE=1 SV=2
	Hemoglobin subunit alpha OS=Homo sapiens GN=HBA1 PE=1 SV=2	Ig delta chain C region (Fragment) OS=Homo sapiens GN=IGHD PE=1 SV=1
	Hemoglobin subunit beta OS=Homo sapiens GN=HBB PE=1 SV=2	Ig gamma-1 chain C region OS=Homo sapiens GN=IGHG1 PE=1 SV=1
	Hemopexin OS=Homo sapiens GN=HPX PE=1 SV=2	Ig gamma-1 chain C region OS=Homo sapiens GN=IGHG1 PE=1 SV=1
	Histidine-rich glycoprotein OS=Homo sapiens GN=HRG PE=1 SV=1	Ig gamma-2 chain C region OS=Homo sapiens GN=IGHG2 PE=1 SV=2
	Histone H2A type 1-B/E OS=Homo sapiens GN=HIST1H2AB PE=1 SV=2	Ig gamma-3 chain C region OS=Homo sapiens GN=IGHG3 PE=1 SV=1
	Histone H2B OS=Homo sapiens GN=HIST2H2BF PE=1 SV=1	Ig kappa chain C region OS=Homo sapiens GN=IGKC PE=1 SV=1
	Histone H4 OS=Homo sapiens GN=HIST1H4A PE=1 SV=2	Ig kappa chain V-I region DEE OS=Homo sapiens PE=1 SV=1
	Hornerin OS=Homo sapiens GN=HRNR PE=1 SV=2	Ig kappa chain V-II region TEW OS=Homo sapiens PE=1 SV=1
	Hyaluronan-binding protein 2 OS=Homo sapiens GN=HABP2 PE=1 SV=1	Ig kappa chain V-III region B6 OS=Homo sapiens PE=1 SV=1
	Ig alpha-1 chain C region OS=Homo sapiens GN=IGHA1 PE=1 SV=2	Ig kappa chain V-III region HAH OS=Homo sapiens PE=2 SV=1
	Ig gamma-1 chain C region OS=Homo sapiens GN=IGHG1 PE=1 SV=1	Ig lambda-2 chain C regions (Fragment) OS=Homo sapiens GN=IGLC2 PE=4 SV=1
	Ig gamma-2 chain C region OS=Homo sapiens GN=IGHG2 PE=1 SV=2	Ig mu chain C region OS=Homo sapiens GN=IGHM PE=1 SV=1
	Ig gamma-3 chain C region OS=Homo sapiens GN=IGHG3 PE=1 SV=2	IgGFc-binding protein OS=Homo sapiens GN=FCGBP PE=1 SV=3
	Ig gamma-4 chain C region OS=Homo sapiens GN=IGHG4 PE=1 SV=1	Immunoglobulin lambda-like polypeptide 5 OS=Homo sapiens GN=IGLL5 PE=1 SV=1
	Ig heavy chain V-I region V35 OS=Homo sapiens PE=1 SV=1	Insulin-like growth factor-binding protein 2 OS=Homo sapiens GN=IGFBP2 PE=1 SV=2
	Ig heavy chain V-II region NEWM OS=Homo sapiens PE=1 SV=1	Insulin-like growth factor-binding protein 3 OS=Homo sapiens GN=IGFBP3 PE=1 SV=2
	Ig heavy chain V-III region BRO OS=Homo sapiens PE=1 SV=1	Insulin-like growth factor-binding protein 5 OS=Homo sapiens GN=IGFBP5 PE=1 SV=1
	Ig heavy chain V-III region CAM OS=Homo sapiens PE=1 SV=1	Insulin-like growth factor-binding protein complex acid labile subunit OS=Homo sapiens GN=IGFALS PE=1 SV=1
	Ig heavy chain V-III region GAL OS=Homo sapiens PE=1 SV=1	Inter-alpha-trypsin inhibitor heavy chain H1 OS=Homo sapiens GN=ITIH1 PE=1 SV=3
	Ig heavy chain V-III region NIE OS=Homo sapiens PE=1 SV=1	Inter-alpha-trypsin inhibitor heavy chain H2 OS=Homo sapiens GN=ITIH2 PE=1 SV=1
	Ig heavy chain V-III region VH26 OS=Homo sapiens PE=1 SV=1	Inter-alpha-trypsin inhibitor heavy chain H3 OS=Homo sapiens GN=ITIH3 PE=1 SV=2
	Ig kappa chain C region OS=Homo sapiens GN=IGKC PE=1 SV=1	Inter-alpha-trypsin inhibitor heavy chain H4 OS=Homo sapiens GN=ITIH4 PE=1 SV=4
	Ig kappa chain V-I region AU OS=Homo sapiens PE=1 SV=1	Isoform 2 of Anthrax toxin receptor 2 OS=Homo sapiens GN=ANTXR2
	Ig kappa chain V-I region HK102 (Fragment) OS=Homo sapiens GN=IGKV1-5 PE=4 SV=1	Isoform 2 of Dermcidin OS=Homo sapiens GN=DCD
	Ig kappa chain V-II region RPMI 6410 OS=Homo sapiens PE=4 SV=1	Isoform 2 of Filamin-A OS=Homo sapiens GN=FLNA
	Ig kappa chain V-II region TEW OS=Homo sapiens PE=1 SV=1	Isoform 2 of N-acetylmuramoyl-L-alanine amidase OS=Homo sapiens GN=PGLYRP2
	Ig kappa chain V-III region CLL OS=Homo sapiens PE=1 SV=2	Isoform 2 of Vitamin K-dependent protein C OS=Homo sapiens GN=PROC
	Ig kappa chain V-III region HAH OS=Homo sapiens PE=2 SV=1	Isoform 3 of Cartilage acidic protein 1 OS=Homo sapiens GN=CRTAC1
	Ig kappa chain V-III region VG (Fragment) OS=Homo sapiens PE=1 SV=1	Isoform 3 of Collagen alpha-1(XVIII) chain OS=Homo sapiens GN=COL18A1
	Ig kappa chain V-IV region (Fragment) OS=Homo sapiens GN=IGKV4-1 PE=4 SV=1	Isoform 3 of L-lactate dehydrogenase A chain OS=Homo sapiens GN=LDHA
	Ig lambda chain V-I region NIG-64 OS=Homo sapiens PE=1 SV=1	Isoform 3 of Plasma protease C1 inhibitor OS=Homo sapiens GN=SERPING1
	Ig lambda chain V-I region WAH OS=Homo sapiens PE=1 SV=1	Isoform 4 of Clusterin OS=Homo sapiens GN=CLU
	Ig lambda chain V-III region LOI OS=Homo sapiens PE=1 SV=1	Isoform C of Fibulin-1 OS=Homo sapiens GN=FBLN1
	Ig lambda chain V-IV region Hil OS=Homo sapiens PE=1 SV=1	Isoform F of Proteoglycan 4 OS=Homo sapiens GN=PRG4
	Ig lambda-2 chain C regions OS=Homo sapiens GN=IGLC2 PE=1 SV=1	Isoform LMW of Kininogen-1 OS=Homo sapiens GN=KNG1
	Ig lambda-7 chain C region OS=Homo sapiens GN=IGLC7 PE=1 SV=2	Kallistatin OS=Homo sapiens GN=SERPINA4 PE=1 SV=3
	Ig mu chain C region OS=Homo sapiens GN=IGHM PE=1 SV=3	Keratinocyte proline-rich protein OS=Homo sapiens GN=KPRP PE=1 SV=1
	Immunoglobulin J chain (Fragment) OS=Homo sapiens GN=IGJ PE=1 SV=2	Kininogen-1 OS=Homo sapiens GN=KNG1 PE=1 SV=2
	Immunoglobulin lambda-like polypeptide 5 OS=Homo sapiens GN=IGLL5 PE=2 SV=2	Lactotransferrin OS=Homo sapiens GN=LTF PE=1 SV=1
	Insulin-like growth factor I OS=Homo sapiens GN=IGF1 PE=1 SV=1	Lipopolysaccharide-binding protein OS=Homo sapiens GN=LBP PE=1 SV=3
	Insulin-like growth factor II OS=Homo sapiens GN=IGF2 PE=1 SV=1	Mannan-binding lectin serine protease 1 OS=Homo sapiens GN=MASP1 PE=1 SV=3
	Insulin-like growth factor-binding protein 2 OS=Homo sapiens GN=IGFBP2 PE=2 SV=1	Mannosyl-oligosaccharide 1,2-alpha-mannosidase IA OS=Homo sapiens GN=MAN1A1 PE=1 SV=3
	Insulin-like growth factor-binding protein 3 OS=Homo sapiens GN=IGFBP3 PE=1 SV=2	Moesin OS=Homo sapiens GN=MSN PE=1 SV=3
	Insulin-like growth factor-binding protein 4 OS=Homo sapiens GN=IGFBP4 PE=1 SV=2	Multiple inositol polyphosphate phosphatase 1 OS=Homo sapiens GN=MINPP1 PE=1 SV=1
	Insulin-like growth factor-binding protein complex acid labile subunit OS=Homo sapiens GN=IGFALS PE=1 SV=1	Myosin-9 OS=Homo sapiens GN=MYH9 PE=1 SV=4
	Inter-alpha-trypsin inhibitor heavy chain H1 OS=Homo sapiens GN=ITIH1 PE=1 SV=3	Neutrophil defensin 1 OS=Homo sapiens GN=DEFA1 PE=1 SV=1
	Inter-alpha-trypsin inhibitor heavy chain H2 OS=Homo sapiens GN=ITIH2 PE=1 SV=2	Nicotinate phosphoribosyltransferase (Fragment) OS=Homo sapiens GN=NAPRT PE=1 SV=1
	Isoform 12 of Titin OS=Homo sapiens GN=TTN	Peptidyl-prolyl cis-trans isomerase B OS=Homo sapiens GN=PPIB PE=1 SV=2
	Isoform 2 of C4b-binding protein beta chain OS=Homo sapiens GN=C4BPB	Phosphatidylinositol-glycan-specific phospholipase D OS=Homo sapiens GN=GPLD1 PE=1 SV=3
	Isoform 2 of Inter-alpha-trypsin inhibitor heavy chain H4 OS=Homo sapiens GN=ITIH4	Phosphoglycerate kinase 1 OS=Homo sapiens GN=PGK1 PE=1 SV=3
	Isoform 4 of Collagen alpha-3(VI) chain OS=Homo sapiens GN=COL6A3	Phospholipid transfer protein OS=Homo sapiens GN=PLTP PE=1 SV=1
	Isoform C of Proteoglycan 4 OS=Homo sapiens GN=PRG4	Pigment epithelium-derived factor OS=Homo sapiens GN=SERPINF1 PE=1 SV=4
	Isoform F of Proteoglycan 4 OS=Homo sapiens GN=PRG4	Plasma kallikrein (Fragment) OS=Homo sapiens GN=KLKB1 PE=1 SV=1
	Isoform H7 of Myeloperoxidase OS=Homo sapiens GN=MPO	Plasma serine protease inhibitor OS=Homo sapiens GN=SERPINA5 PE=1 SV=3
	Isoform LMW of Kininogen-1 OS=Homo sapiens GN=KNG1	Plasminogen OS=Homo sapiens GN=PLG PE=1 SV=2
	Kaliocin-1 (Fragment) OS=Homo sapiens GN=LTF PE=1 SV=1	Platelet basic protein OS=Homo sapiens GN=PPBP PE=1 SV=3
	Keratinocyte proline-rich protein OS=Homo sapiens GN=KPRP PE=1 SV=1	Platelet-activating factor acetylhydrolase OS=Homo sapiens GN=PLA2G7 PE=1 SV=1
	Kinesin-like protein KIF26B OS=Homo sapiens GN=KIF26B PE=1 SV=1	Polymeric immunoglobulin receptor OS=Homo sapiens GN=PIGR PE=1 SV=4
	Laminin subunit alpha-4 OS=Homo sapiens GN=LAMA4 PE=1 SV=4	Pregnancy zone protein OS=Homo sapiens GN=PZP PE=1 SV=4
	Laminin subunit beta-1 OS=Homo sapiens GN=LAMB1 PE=1 SV=1	Prenylcysteine oxidase 1 OS=Homo sapiens GN=PCYOX1 PE=1 SV=3
	Laminin subunit gamma-1 OS=Homo sapiens GN=LAMC1 PE=1 SV=3	Procollagen C-endopeptidase enhancer 1 OS=Homo sapiens GN=PCOLCE PE=1 SV=2
	Leukocyte elastase inhibitor OS=Homo sapiens GN=SERPINB1 PE=1 SV=1	Properdin OS=Homo sapiens GN=CFP PE=1 SV=2
	Lipopolysaccharide-binding protein OS=Homo sapiens GN=LBP PE=1 SV=3	Proprotein convertase subtilisin/kexin type 9 OS=Homo sapiens GN=PCSK9 PE=1 SV=3
	Lysozyme C OS=Homo sapiens GN=LYZ PE=1 SV=1	Protein AMBP OS=Homo sapiens GN=AMBP PE=1 SV=1
	Metalloproteinase inhibitor 1 OS=Homo sapiens GN=TIMP1 PE=1 SV=1	Protein APOC4-APOC2 OS=Homo sapiens GN=APOC4-APOC2 PE=4 SV=1
	Mimecan OS=Homo sapiens GN=OGN PE=1 SV=1	Protein disulfide-isomerase A3 OS=Homo sapiens GN=PDIA3 PE=1 SV=4
	Moesin OS=Homo sapiens GN=MSN PE=1 SV=3	Protein IGHV3-15 (Fragment) OS=Homo sapiens GN=IGHV3-15 PE=1 SV=1
	Myosin-9 OS=Homo sapiens GN=MYH9 PE=1 SV=4	Protein IGHV3-74 (Fragment) OS=Homo sapiens GN=IGHV3-74 PE=1 SV=1
	Neutrophil defensin 1 OS=Homo sapiens GN=DEFA1 PE=1 SV=1	Protein IGHV5-51 (Fragment) OS=Homo sapiens GN=IGHV5-51 PE=1 SV=1
	Neutrophil gelatinase-associated lipocalin OS=Homo sapiens GN=LCN2 PE=1 SV=1	Protein IGKV3-11 OS=Homo sapiens GN=IGKV3-11 PE=4 SV=1
	Nicotinamide phosphoribosyltransferase OS=Homo sapiens GN=NAMPT PE=1 SV=1	Protein IGLV3-19 (Fragment) OS=Homo sapiens GN=IGLV3-19 PE=1 SV=1
	Nucleoside diphosphate kinase B OS=Homo sapiens GN=NME2 PE=1 SV=1	Protein IGLV3-21 (Fragment) OS=Homo sapiens GN=IGLV3-21 PE=1 SV=1
	Peptidyl-prolyl cis-trans isomerase A OS=Homo sapiens GN=PPIA PE=1 SV=2	Protein IGLV3-25 (Fragment) OS=Homo sapiens GN=IGLV3-25 PE=1 SV=2
	Peptidyl-prolyl cis-trans isomerase B OS=Homo sapiens GN=PPIB PE=1 SV=2	Protein S100-A9 OS=Homo sapiens GN=S100A9 PE=1 SV=1
	Peroxiredoxin-2 OS=Homo sapiens GN=PRDX2 PE=1 SV=5	Protein SAA2-SAA4 OS=Homo sapiens GN=SAA2-SAA4 PE=4 SV=1
	Phosphoglycerate kinase OS=Homo sapiens GN=PGK1 PE=1 SV=1	Protein Z-dependent protease inhibitor OS=Homo sapiens GN=SERPINA10 PE=1 SV=1
	Phospholipase A2, membrane associated OS=Homo sapiens GN=PLA2G2A PE=1 SV=2	Prothrombin OS=Homo sapiens GN=F2 PE=1 SV=2
	Phospholipid transfer protein OS=Homo sapiens GN=PLTP PE=1 SV=1	Pyruvate kinase PKM OS=Homo sapiens GN=PKM PE=1 SV=4
	Pigment epithelium-derived factor OS=Homo sapiens GN=SERPINF1 PE=1 SV=4	Ras-related protein Rap-1b OS=Homo sapiens GN=RAP1B PE=1 SV=1
	Plasma kallikrein heavy chain (Fragment) OS=Homo sapiens GN=KLKB1 PE=3 SV=1	Replication factor C subunit 1 OS=Homo sapiens GN=RFC1 PE=1 SV=4
	Plasma protease C1 inhibitor OS=Homo sapiens GN=SERPING1 PE=2 SV=1	Retinoic acid receptor responder protein 2 OS=Homo sapiens GN=RARRES2 PE=1 SV=1
	Plasma serine protease inhibitor OS=Homo sapiens GN=SERPINA5 PE=1 SV=3	Retinol-binding protein 4 OS=Homo sapiens GN=RBP4 PE=1 SV=1
	Plasminogen activator inhibitor 1 OS=Homo sapiens GN=SERPINE1 PE=1 SV=1	Ribonuclease 4 OS=Homo sapiens GN=RNASE4 PE=1 SV=3
	Plasminogen OS=Homo sapiens GN=PLG PE=1 SV=2	Secreted phosphoprotein 24 OS=Homo sapiens GN=SPP2 PE=1 SV=1
	Plastin-2 OS=Homo sapiens GN=LCP1 PE=1 SV=6	Selenoprotein P OS=Homo sapiens GN=SEPP1 PE=1 SV=3
	Platelet basic protein OS=Homo sapiens GN=PPBP PE=1 SV=3	Serotransferrin OS=Homo sapiens GN=TF PE=1 SV=3
	Platelet factor 4 OS=Homo sapiens GN=PF4 PE=1 SV=2	Serpin A11 OS=Homo sapiens GN=SERPINA11 PE=2 SV=2
	Procollagen C-endopeptidase enhancer 1 OS=Homo sapiens GN=PCOLCE PE=1 SV=2	Serum albumin OS=Homo sapiens GN=ALB PE=1 SV=2
	Profilin-1 OS=Homo sapiens GN=PFN1 PE=1 SV=2	Serum amyloid P-component OS=Homo sapiens GN=APCS PE=1 SV=2
	Properdin OS=Homo sapiens GN=CFP PE=1 SV=2	Serum paraoxonase/arylesterase 1 OS=Homo sapiens GN=PON1 PE=1 SV=3
	Protein AMBP OS=Homo sapiens GN=AMBP PE=1 SV=1	Sulfhydryl oxidase 1 OS=Homo sapiens GN=QSOX1 PE=1 SV=3
	Protein APOC4-APOC2 OS=Homo sapiens GN=APOC4-APOC2 PE=4 SV=1	Tenascin OS=Homo sapiens GN=TNC PE=1 SV=3
	Protein ARPC4-TTLL3 OS=Homo sapiens GN=ARPC4-TTLL3 PE=2 SV=1	Tetranectin OS=Homo sapiens GN=CLEC3B PE=1 SV=1
	Protein disulfide-isomerase OS=Homo sapiens GN=PDIA3 PE=1 SV=1	Thrombospondin-1 OS=Homo sapiens GN=THBS1 PE=1 SV=2
	Protein S100-A11 OS=Homo sapiens GN=S100A11 PE=1 SV=2	Thrombospondin-4 OS=Homo sapiens GN=THBS4 PE=1 SV=2
	Protein S100-A12 OS=Homo sapiens GN=S100A12 PE=1 SV=2	Transforming growth factor-beta-induced protein ig-h3 OS=Homo sapiens GN=TGFBI PE=1 SV=1
	Protein S100-A6 OS=Homo sapiens GN=S100A6 PE=1 SV=1	Transthyretin OS=Homo sapiens GN=TTR PE=1 SV=1
	Protein S100-A8 OS=Homo sapiens GN=S100A8 PE=1 SV=1	Trypsin-1 OS=Homo sapiens GN=PRSS1 PE=1 SV=1
	Protein S100-A9 OS=Homo sapiens GN=S100A9 PE=1 SV=1	Uncharacterized protein OS=Homo sapiens PE=1 SV=1
	Protein S100-P OS=Homo sapiens GN=S100P PE=1 SV=2	Vinculin OS=Homo sapiens GN=VCL PE=1 SV=4
	Protein Shroom3 OS=Homo sapiens GN=SHROOM3 PE=1 SV=2	Vitamin D-binding protein OS=Homo sapiens GN=GC PE=1 SV=1
	Protein Z-dependent protease inhibitor OS=Homo sapiens GN=SERPINA10 PE=3 SV=1	Vitamin D-binding protein OS=Homo sapiens GN=GC PE=1 SV=1
	Prothrombin OS=Homo sapiens GN=F2 PE=1 SV=2	Vitamin K-dependent protein S OS=Homo sapiens GN=PROS1 PE=1 SV=1
	Pyruvate kinase (Fragment) OS=Homo sapiens GN=PKM PE=1 SV=1	Vitamin K-dependent protein Z OS=Homo sapiens GN=PROZ PE=1 SV=2
	Regenerating islet-derived protein 3-alpha OS=Homo sapiens GN=REG3A PE=1 SV=1	Vitronectin OS=Homo sapiens GN=VTN PE=1 SV=1
	Regulator of G-protein signaling 3 OS=Homo sapiens GN=RGS3 PE=1 SV=2
	Resistin OS=Homo sapiens GN=RETN PE=2 SV=1
	Retinoic acid receptor responder protein 2 OS=Homo sapiens GN=RARRES2 PE=1 SV=1
	Retinol-binding protein 4 OS=Homo sapiens GN=RBP4 PE=1 SV=3
	Ribonuclease 4 OS=Homo sapiens GN=RNASE4 PE=1 SV=3
	Ribonuclease pancreatic OS=Homo sapiens GN=RNASE1 PE=1 SV=4
	Selenoprotein P (Fragment) OS=Homo sapiens GN=SEPP1 PE=4 SV=1
	Serotransferrin OS=Homo sapiens GN=TF PE=1 SV=3
	Serum albumin OS=Homo sapiens GN=ALB PE=1 SV=2
	Serum amyloid A-1 protein OS=Homo sapiens GN=SAA1 PE=1 SV=1
	Serum amyloid A-4 protein OS=Homo sapiens GN=SAA4 PE=1 SV=2
	Serum amyloid P-component OS=Homo sapiens GN=APCS PE=1 SV=2
	Serum paraoxonase/arylesterase 1 OS=Homo sapiens GN=PON1 PE=1 SV=3
	Soluble scavenger receptor cysteine-rich domain-containing protein SSC5D OS=Homo sapiens GN=SSC5D PE=2 SV=3
	Spondin-1 OS=Homo sapiens GN=SPON1 PE=1 SV=2
	Sulfhydryl oxidase 1 OS=Homo sapiens GN=QSOX1 PE=1 SV=3
	Talin-1 OS=Homo sapiens GN=TLN1 PE=1 SV=1
	Tenascin OS=Homo sapiens GN=TNC PE=1 SV=3
	Tenascin-X OS=Homo sapiens GN=TNXB PE=2 SV=1
	Tetranectin OS=Homo sapiens GN=CLEC3B PE=4 SV=1
	Thrombospondin-1 OS=Homo sapiens GN=THBS1 PE=1 SV=2
	Transaldolase OS=Homo sapiens GN=TALDO1 PE=1 SV=1
	Transforming growth factor-beta-induced protein ig-h3 OS=Homo sapiens GN=TGFBI PE=2 SV=1
	Transforming protein RhoA OS=Homo sapiens GN=RHOA PE=1 SV=1
	Transketolase OS=Homo sapiens GN=TKT PE=1 SV=1
	Transthyretin OS=Homo sapiens GN=TTR PE=1 SV=1
	Truncated apolipoprotein C-I (Fragment) OS=Homo sapiens GN=APOC1 PE=2 SV=1
	Trypsin-2 OS=Homo sapiens GN=PRSS2 PE=1 SV=1
	Unconventional myosin-Vc OS=Homo sapiens GN=MYO5C PE=1 SV=2
	Versican core protein OS=Homo sapiens GN=VCAN PE=1 SV=3
	Vitamin D-binding protein OS=Homo sapiens GN=GC PE=1 SV=1
	Vitamin K-dependent protein S OS=Homo sapiens GN=PROS1 PE=1 SV=1
	Vitronectin OS=Homo sapiens GN=VTN PE=1 SV=1
	Zinc-alpha-2-glycoprotein OS=Homo sapiens GN=AZGP1 PE=1 SV=2
